# Supplementary material for: Dendritic cell-mediated cross presentation of tumor-derived peptides is biased against plasma membrane proteins
Source: HighWire-hosted journal article supplement (doi:10.1136/jitc-2021-004159), 2022-07-01
Supplement: jitc-2021-004159supp001_data_supplement.xlsx [file jitc-2021-004159supp001_data_supplement.xlsx]

## Sheet: Sheet1
Supplementary Data 1. Label free quantification of pMHCs
B16F10									DCs
Sequence	Master Protein Descriptions	Gene	Abundances	Length	Log10 Abundance	Rank	Percentile		Sequence	Master Protein Descriptions	Gene	Abundances	Length	Log10 Abundance	Rank	Percentile
FQIVNPHLL	Ribonucleoside-diphosphate reductase large subunit OS=Mus musculus OX=10090 GN=Rrm1 PE=1 SV=2	Rrm1	3640745728	9	9.56119	1586	100		PPLLAARLVPP	RNA-binding protein 27 OS=Mus musculus OX=10090 GN=Rbm27 PE=1 SV=3	Rbm27	2484682364	11	9.39527	627	100
SIYRYYGL	SIY [mouse]	SIY	1858585856	8	9.26918	1585	99.9369		AFAVLLGLGLG	Tumor necrosis factor receptor superfamily member 4 OS=Mus musculus OX=10090 GN=Tnfrsf4 PE=1 SV=1	Tnfrsf4	971613972	11	8.98749	626	99.8405
SQVMNLHNL	L-dopachrome tautomerase OS=Mus musculus OX=10090 GN=Dct PE=1 SV=2	Dct	1806039168	9	9.25673	1584	99.8739		KALINADEL	Spectrin alpha chain, non-erythrocytic 1 OS=Mus musculus OX=10090 GN=Sptan1 PE=1 SV=4	Sptan1	590236096	9	8.77103	625	99.681
PPLLAARLVPP	RNA-binding protein 27 OS=Mus musculus OX=10090 GN=Rbm27 PE=1 SV=3	Rbm27	1106994077	11	9.04415	1583	99.8108		SQVMNLHNL	L-dopachrome tautomerase OS=Mus musculus OX=10090 GN=Dct PE=1 SV=2	Dct	576344128	9	8.76068	624	99.5215
RPGVYTNI	Testisin OS=Mus musculus OX=10090 GN=Prss21 PE=1 SV=2	Prss21	976860160	8	8.98983	1582	99.7478		RPGVYTNI	Testisin OS=Mus musculus OX=10090 GN=Prss21 PE=1 SV=2	Prss21	543579968	8	8.73526	623	99.362
RTYTYEKL	Catenin beta-1 OS=Mus musculus OX=10090 GN=Ctnnb1 PE=1 SV=1	Ctnnb1	849295136	8	8.92906	1581	99.6847		NSIRNLDTI	Ataxin-10 OS=Mus musculus OX=10090 GN=Atxn10 PE=1 SV=2	Atxn10	441789984	9	8.64522	622	99.2026
PRKIEEIKDF	60S ribosomal protein L38 OS=Mus musculus OX=10090 GN=Rpl38 PE=1 SV=3	Rpl38	725356636	10	8.86055	1580	99.6217		SIYRYYGL	SIY [mouse]	SIY	438353920	8	8.64182	621	99.0431
SLGSALRP	Vimentin OS=Mus musculus OX=10090 GN=Vim PE=1 SV=3	Vim	701897152	8	8.84627	1579	99.5586		RTYTYEKL	Catenin beta-1 OS=Mus musculus OX=10090 GN=Ctnnb1 PE=1 SV=1	Ctnnb1	428152744	8	8.6316	620	98.8836
AFAVLLGLGLG	Tumor necrosis factor receptor superfamily member 4 OS=Mus musculus OX=10090 GN=Tnfrsf4 PE=1 SV=1	Tnfrsf4	592593878	11	8.77276	1578	99.4956		ATLVFHNL	Signal transducer and activator of transcription 3 OS=Mus musculus OX=10090 GN=Stat3 PE=1 SV=2	Stat3	420225728	8	8.62348	619	98.7241
RSVTDPAMAPRT	Nascent polypeptide-associated complex subunit alpha, muscle-specific form OS=Mus musculus OX=10090 GN=Naca PE=1 SV=2	Naca	561238304	12	8.74915	1577	99.4325		LQQQLEQL	Max dimerization protein 3 OS=Mus musculus OX=10090 GN=Mxd3 PE=1 SV=1	Mxd3	332455712	8	8.52173	618	98.5646
NLSKEDDVRQY	40S ribosomal protein S6 OS=Mus musculus OX=10090 GN=Rps6 PE=1 SV=1	Rps6	553139088	11	8.74283	1576	99.3695		GGIQNVGHI	Inosine-5'-monophosphate dehydrogenase 2 OS=Mus musculus OX=10090 GN=Impdh2 PE=1 SV=2	Impdh2	308895456	9	8.48981	617	98.4051
INFDFPKL	Probable ATP-dependent RNA helicase DDX6 OS=Mus musculus OX=10090 GN=Ddx6 PE=1 SV=1	Ddx6	503332224	8	8.70185	1575	99.3064		SSRHPDSLSS	Interphotoreceptor matrix proteoglycan 2 OS=Mus musculus OX=10090 GN=Impg2 PE=1 SV=1	Impg2	274582944	10	8.43867	616	98.2456
NSIRNLDTI	Ataxin-10 OS=Mus musculus OX=10090 GN=Atxn10 PE=1 SV=2	Atxn10	465809280	9	8.66821	1574	99.2434		RLLGTEFQV	Membrane-associated transporter protein OS=Mus musculus OX=10090 GN=Slc45a2 PE=1 SV=1	Slc45a2	266894448	9	8.42634	615	98.0861
AGVRNPQQHL	Polyadenylate-binding protein 1 OS=Mus musculus OX=10090 GN=Pabpc1 PE=1 SV=2	Pabpc1	415456192	10	8.61853	1573	99.1803		PRKIEEIKDF	60S ribosomal protein L38 OS=Mus musculus OX=10090 GN=Rpl38 PE=1 SV=3	Rpl38	255555136	10	8.40748	614	97.9266
PLPVLGLGGL	Dual specificity protein phosphatase 6 OS=Mus musculus OX=10090 GN=Dusp6 PE=1 SV=1	Dusp6	410093865	10	8.61288	1572	99.1173		SLGSALRP	Vimentin OS=Mus musculus OX=10090 GN=Vim PE=1 SV=3	Vim	245254272	8	8.38962	613	97.7671
VNFEFPEF	40S ribosomal protein S7 OS=Mus musculus OX=10090 GN=Rps7 PE=2 SV=1	Rps7	391757696	8	8.59302	1571	99.0542		SAPENAVRM	Protein C10 OS=Mus musculus OX=10090 GN=Grcc10 PE=1 SV=1	Grcc10	217669968	9	8.3378	612	97.6077
KALINADEL	Spectrin alpha chain, non-erythrocytic 1 OS=Mus musculus OX=10090 GN=Sptan1 PE=1 SV=4	Sptan1	382024640	9	8.58209	1570	98.9912		SAPRNFVENF	Elongator complex protein 2 OS=Mus musculus OX=10090 GN=Elp2 PE=1 SV=1	Elp2	215287472	10	8.33302	611	97.4482
ASYEFVQRL	Cytoplasmic dynein 1 heavy chain 1 OS=Mus musculus OX=10090 GN=Dync1h1 PE=1 SV=2	Dync1h1	375924160	9	8.5751	1569	98.9281		FAHTNIESL	Protein disulfide-isomerase A3 OS=Mus musculus OX=10090 GN=Pdia3 PE=1 SV=2	Pdia3	203209424	9	8.30794	610	97.2887
RLLGTEFQV	Membrane-associated transporter protein OS=Mus musculus OX=10090 GN=Slc45a2 PE=1 SV=1	Slc45a2	3.72308e+08	9	8.5709	1568	98.8651		ASYEFVQRL	Cytoplasmic dynein 1 heavy chain 1 OS=Mus musculus OX=10090 GN=Dync1h1 PE=1 SV=2	Dync1h1	192399216	9	8.2842	609	97.1292
FAPVNVTTEVK	Elongation factor 1-alpha 1 OS=Mus musculus OX=10090 GN=Eef1a1 PE=1 SV=3	Eef1a1	350508448	11	8.5447	1567	98.802		FGPVNHEEL	Cyclin-dependent kinase inhibitor 1B OS=Mus musculus OX=10090 GN=Cdkn1b PE=1 SV=2	Cdkn1b	186094032	9	8.26973	608	96.9697
LHFFMPGFAPL	Tubulin beta-3 chain OS=Mus musculus OX=10090 GN=Tubb3 PE=1 SV=1;Tubulin beta-5 chain OS=Mus musculus OX=10090 GN=Tubb5 PE=1 SV=1;Tubulin beta-4B chain OS=Mus musculus OX=10090 GN=Tubb4b PE=1 SV=1;Tubulin beta-6 chain OS=Mus musculus OX=10090 GN=Tubb6 PE=1 SV=1	Tubb3	326859232	11	8.51436	1566	98.739		AMGVNLTSM	Proliferating cell nuclear antigen OS=Mus musculus OX=10090 GN=Pcna PE=1 SV=2	Pcna	166585664	9	8.22164	607	96.8102
FAHTNIESL	Protein disulfide-isomerase A3 OS=Mus musculus OX=10090 GN=Pdia3 PE=1 SV=2	Pdia3	326101632	9	8.51335	1565	98.6759		SSMSYPLQ	H(+)/Cl(-) exchange transporter 7 OS=Mus musculus OX=10090 GN=Clcn7 PE=1 SV=1	Clcn7	164972688	8	8.21741	606	96.6507
SAIINEDNL	Protein EFR3 homolog A OS=Mus musculus OX=10090 GN=Efr3a PE=1 SV=1	Efr3a	321777888	9	8.50756	1564	98.6129		VMVTNVTSL	Talin-2 OS=Mus musculus OX=10090 GN=Tln2 PE=1 SV=3;Talin-1 OS=Mus musculus OX=10090 GN=Tln1 PE=1 SV=2	Tln2	164427904	9	8.21598	605	96.4912
SAPRNFVENF	Elongator complex protein 2 OS=Mus musculus OX=10090 GN=Elp2 PE=1 SV=1	Elp2	308964416	10	8.48991	1563	98.5498		VNVDYSKL	Cytochrome c oxidase subunit NDUFA4 OS=Mus musculus OX=10090 GN=Ndufa4 PE=1 SV=2	Ndufa4	155636368	8	8.19211	604	96.3317
AGIFHFQF	Calpain-3 OS=Mus musculus OX=10090 GN=Capn3 PE=1 SV=2;Calpain-2 catalytic subunit OS=Mus musculus OX=10090 GN=Capn2 PE=1 SV=4	Capn3	303364896	8	8.48197	1562	98.4868		NLSKEDDVRQY	40S ribosomal protein S6 OS=Mus musculus OX=10090 GN=Rps6 PE=1 SV=1	Rps6	152993108	11	8.18467	603	96.1722
SAPENAVRM	Protein C10 OS=Mus musculus OX=10090 GN=Grcc10 PE=1 SV=1	Grcc10	300989568	9	8.47855	1561	98.4237		FLQALGLG	Neuromedin-U receptor 1 OS=Mus musculus OX=10090 GN=Nmur1 PE=2 SV=2	Nmur1	140351739	8	8.14722	602	96.0128
VGFDYKERL	Src substrate cortactin OS=Mus musculus OX=10090 GN=Cttn PE=1 SV=2	Cttn	294052808	9	8.46843	1560	98.3607		RAIENIDTL	Protein phosphatase 1 regulatory subunit 7 OS=Mus musculus OX=10090 GN=Ppp1r7 PE=1 SV=2	Ppp1r7	138940304	9	8.14283	601	95.8533
FGGSGTSSRP	Vimentin OS=Mus musculus OX=10090 GN=Vim PE=1 SV=3	Vim	270151968	10	8.43161	1559	98.2976		YVHVNRDTL	Bifunctional polynucleotide phosphatase/kinase OS=Mus musculus OX=10090 GN=Pnkp PE=1 SV=2	Pnkp	138486128	9	8.14141	600	95.6938
MAPQNLSTF	DnaJ homolog subfamily B member 11 OS=Mus musculus OX=10090 GN=Dnajb11 PE=1 SV=1	Dnajb11	252190624	9	8.40173	1558	98.2346		SAIINEDNL	Protein EFR3 homolog A OS=Mus musculus OX=10090 GN=Efr3a PE=1 SV=1	Efr3a	122665160	9	8.08872	599	95.5343
AIKKKDELERVA	40S ribosomal protein S5 OS=Mus musculus OX=10090 GN=Rps5 PE=1 SV=3	Rps5	247366600	12	8.39334	1557	98.1715		RSIKNVTEL	Replication termination factor 2 OS=Mus musculus OX=10090 GN=Rtf2 PE=1 SV=1	Rtf2	110737678	9	8.0443	598	95.3748
HGVVPLATYM	60S ribosomal protein L21 OS=Mus musculus OX=10090 GN=Rpl21 PE=1 SV=3	Rpl21	243458768	10	8.38643	1556	98.1084		AIKKKDELERVA	40S ribosomal protein S5 OS=Mus musculus OX=10090 GN=Rps5 PE=1 SV=3	Rps5	110407220	12	8.043	597	95.2153
SSIVNKEGL	Tropomodulin-1 OS=Mus musculus OX=10090 GN=Tmod1 PE=1 SV=2	Tmod1	233458496	9	8.36821	1555	98.0454		YAGSNFPEHI	Actin-related protein 2 OS=Mus musculus OX=10090 GN=Actr2 PE=1 SV=1	Actr2	109312472	10	8.03867	596	95.0558
SAVKNLQQL	GATOR complex protein NPRL3 OS=Mus musculus OX=10090 GN=Nprl3 PE=1 SV=1	Nprl3	230142368	9	8.362	1554	97.9823		FTASISAYMAA	CKLF-like MARVEL transmembrane domain-containing protein 5 OS=Mus musculus OX=10090 GN=Cmtm5 PE=1 SV=1	Cmtm5	108794568	11	8.03661	595	94.8963
VNVDYSKL	Cytochrome c oxidase subunit NDUFA4 OS=Mus musculus OX=10090 GN=Ndufa4 PE=1 SV=2	Ndufa4	224291040	8	8.35081	1553	97.9193		FIDGHTKILT	Oogenesin-2 OS=Mus musculus OX=10090 GN=Oog2 PE=2 SV=1	Oog2	108516828	10	8.0355	594	94.7368
FGPVNHEEL	Cyclin-dependent kinase inhibitor 1B OS=Mus musculus OX=10090 GN=Cdkn1b PE=1 SV=2	Cdkn1b	217424816	9	8.33731	1552	97.8562		FAPVNVTTEVK	Elongation factor 1-alpha 1 OS=Mus musculus OX=10090 GN=Eef1a1 PE=1 SV=3	Eef1a1	107369080	11	8.03088	593	94.5774
VKVGVNGF	Glyceraldehyde-3-phosphate dehydrogenase OS=Mus musculus OX=10090 GN=Gapdh PE=1 SV=2	Gapdh	211277792	8	8.32485	1551	97.7932		SAVKNLQQL	GATOR complex protein NPRL3 OS=Mus musculus OX=10090 GN=Nprl3 PE=1 SV=1	Nprl3	103907872	9	8.01665	592	94.4179
GPEGERPARF	40S ribosomal protein S10 OS=Mus musculus OX=10090 GN=Rps10 PE=1 SV=1	Rps10	210323156	10	8.32289	1550	97.7301		GGVVNMYHM	Proteasome subunit beta type-8 OS=Mus musculus OX=10090 GN=Psmb8 PE=1 SV=2	Psmb8	102673424	9	8.01146	591	94.2584
IREEYPDRIM	Tubulin beta-5 chain OS=Mus musculus OX=10090 GN=Tubb5 PE=1 SV=1;Tubulin beta-4B chain OS=Mus musculus OX=10090 GN=Tubb4b PE=1 SV=1;Tubulin beta-6 chain OS=Mus musculus OX=10090 GN=Tubb6 PE=1 SV=1	Tubb5	207819570	10	8.31769	1549	97.6671		AAILGYDEGI	Ubiquinol-cytochrome-c reductase complex assembly factor 1 OS=Mus musculus OX=10090 GN=Uqcc1 PE=1 SV=1	Uqcc1	101602336	10	8.0069	590	94.0989
RVPTPNVSVVD	Glyceraldehyde-3-phosphate dehydrogenase OS=Mus musculus OX=10090 GN=Gapdh PE=1 SV=2	Gapdh	200278384	11	8.30163	1548	97.604		MLIFSVAFIT	Lysosomal-associated transmembrane protein 5 OS=Mus musculus OX=10090 GN=Laptm5 PE=1 SV=1	Laptm5	97140744	10	7.9874	589	93.9394
RSLLLLAPL	Procollagen-lysine,2-oxoglutarate 5-dioxygenase 1 OS=Mus musculus OX=10090 GN=Plod1 PE=1 SV=1	Plod1	194650944	9	8.28926	1547	97.541		MAPQNLSTF	DnaJ homolog subfamily B member 11 OS=Mus musculus OX=10090 GN=Dnajb11 PE=1 SV=1	Dnajb11	96133504	9	7.98287	588	93.7799
RTVENVTVF	Synaptic vesicle membrane protein VAT-1 homolog OS=Mus musculus OX=10090 GN=Vat1 PE=1 SV=3	Vat1	194632240	9	8.28921	1546	97.4779		KIFEFKETL	Calcium/calmodulin-dependent protein kinase type 1D OS=Mus musculus OX=10090 GN=Camk1d PE=1 SV=2	Camk1d	93581856	9	7.97119	587	93.6204
RAIENIDTL	Protein phosphatase 1 regulatory subunit 7 OS=Mus musculus OX=10090 GN=Ppp1r7 PE=1 SV=2	Ppp1r7	194530896	9	8.28899	1545	97.4149		RDSAYISSS	Protein TANC2 OS=Mus musculus OX=10090 GN=Tanc2 PE=1 SV=1	Tanc2	91949664	9	7.96355	586	93.4609
SSPKFSEI	Cytoskeleton-associated protein 5 OS=Mus musculus OX=10090 GN=Ckap5 PE=1 SV=1;WD repeat domain phosphoinositide-interacting protein 4 OS=Mus musculus OX=10090 GN=Wdr45 PE=1 SV=1	Ckap5	190514128	8	8.27993	1544	97.3518		AGIFHFQF	Calpain-3 OS=Mus musculus OX=10090 GN=Capn3 PE=1 SV=2	Capn3	90548304	8	7.95688	585	93.3014
FTASISAYMAA	CKLF-like MARVEL transmembrane domain-containing protein 5 OS=Mus musculus OX=10090 GN=Cmtm5 PE=1 SV=1	Cmtm5	186517408	11	8.27072	1543	97.2888		EIYEFHKM	Neutrophil cytosol factor 1 OS=Mus musculus OX=10090 GN=Ncf1 PE=1 SV=3	Ncf1	84752464	8	7.92815	584	93.1419
IGIENIHYL	Malignant T-cell-amplified sequence 2 OS=Mus musculus OX=10090 GN=Mcts2 PE=1 SV=1	Mcts2	179197104	9	8.25333	1542	97.2257		VGIENIHVM	Myotubularin-related protein 6 OS=Mus musculus OX=10090 GN=Mtmr6 PE=1 SV=1	Mtmr6	78659208	9	7.89575	583	92.9825
HGFREGTTP	60S ribosomal protein L37 OS=Mus musculus OX=10090 GN=Rpl37 PE=3 SV=3	Rpl37	169984464	9	8.23041	1541	97.1627		HGVVPLATYM	60S ribosomal protein L21 OS=Mus musculus OX=10090 GN=Rpl21 PE=1 SV=3	Rpl21	76307688	10	7.88257	582	92.823
SQPVNPHSL	Zinc finger SWIM domain-containing protein 8 OS=Mus musculus OX=10090 GN=Zswim8 PE=1 SV=1	Zswim8	165994704	9	8.22009	1540	97.0996		TSVRFTQL	Nitric oxide synthase-interacting protein OS=Mus musculus OX=10090 GN=Nosip PE=1 SV=1	Nosip	75930408	8	7.88042	581	92.6635
TAQVIILNHPG	Elongation factor 1-alpha 1 OS=Mus musculus OX=10090 GN=Eef1a1 PE=1 SV=3	Eef1a1	157394448	11	8.19699	1539	97.0366		TAVVNRVFDKL	Proteasome subunit beta type-9 OS=Mus musculus bactrianus OX=35531 GN=Psmb9 PE=1 SV=1	Psmb9	75833668	11	7.87986	580	92.504
ASVLNVNHI	Ankyrin repeat domain-containing protein 17 OS=Mus musculus OX=10090 GN=Ankrd17 PE=1 SV=2	Ankrd17	156942528	9	8.19574	1538	96.9735		VKVGVNGF	Glyceraldehyde-3-phosphate dehydrogenase OS=Mus musculus OX=10090 GN=Gapdh PE=1 SV=2	Gapdh	75696512	8	7.87908	579	92.3445
YNEATGGKYVP	Tubulin beta-5 chain OS=Mus musculus OX=10090 GN=Tubb5 PE=1 SV=1;Tubulin beta-4B chain OS=Mus musculus OX=10090 GN=Tubb4b PE=1 SV=1	Tubb5	156370208	11	8.19415	1537	96.9105		AAPRPPPKPM	40S ribosomal protein S26 OS=Mus musculus OX=10090 GN=Rps26 PE=1 SV=3	Rps26	74237346	10	7.87062	578	92.185
SYYLAVSDL	Cytochrome P450 4B1 OS=Mus musculus OX=10090 GN=Cyp4b1 PE=1 SV=1	Cyp4b1	148919392	9	8.17295	1536	96.8474		KMEISQLT	Centrosomal protein of 63 kDa OS=Mus musculus OX=10090 GN=Cep63 PE=1 SV=2	Cep63	74098432	8	7.86981	577	92.0255
TALENLSTL	Fatty acid synthase OS=Mus musculus OX=10090 GN=Fasn PE=1 SV=2	Fasn	147521616	9	8.16886	1535	96.7844		RVPTPNVSVVD	Glyceraldehyde-3-phosphate dehydrogenase OS=Mus musculus OX=10090 GN=Gapdh PE=1 SV=2	Gapdh	73328024	11	7.86527	576	91.866
ATLKDITRRL	ATP synthase subunit gamma, mitochondrial OS=Mus musculus OX=10090 GN=Atp5f1c PE=1 SV=1	Atp5f1c	147289936	10	8.16817	1534	96.7213		SSPKFSEI	Cytoskeleton-associated protein 5 OS=Mus musculus OX=10090 GN=Ckap5 PE=1 SV=1	Ckap5	72985176	8	7.86323	575	91.7065
SIAAFIQRL	Large proline-rich protein BAG6 OS=Mus musculus OX=10090 GN=Bag6 PE=1 SV=1	Bag6	147217616	9	8.16796	1533	96.6583		QSIEFSRL	Eukaryotic translation initiation factor 3 subunit A OS=Mus musculus OX=10090 GN=Eif3a PE=1 SV=5	Eif3a	72865792	8	7.86252	574	91.547
SGPTNEDLYI	3-hydroxy-3-methylglutaryl-coenzyme A reductase OS=Mus musculus OX=10090 GN=Hmgcr PE=1 SV=3	Hmgcr	146503152	10	8.16585	1532	96.5952		SVYVYKVL	Histone H2B type 1-F/J/L OS=Mus musculus OX=10090 GN=H2bc7 PE=1 SV=2	H2bc7	72806064	8	7.86217	573	91.3876
FIDTTSKF	60S ribosomal protein L3 OS=Mus musculus OX=10090 GN=Rpl3 PE=1 SV=3	Rpl3	144005808	8	8.15838	1531	96.5322		GAVQNIAHL	Armadillo repeat-containing protein 8 OS=Mus musculus OX=10090 GN=Armc8 PE=1 SV=2	Armc8	72126744	9	7.8581	572	91.2281
AAPRPPPKPM	40S ribosomal protein S26 OS=Mus musculus OX=10090 GN=Rps26 PE=1 SV=3	Rps26	136513992	10	8.13518	1530	96.4691		SAIMNPASKVI	Clathrin heavy chain 1 OS=Mus musculus OX=10090 GN=Cltc PE=1 SV=3	Cltc	71043312	11	7.85152	571	91.0686
AGPTNVHLI	Homeobox protein SIX5 OS=Mus musculus OX=10090 GN=Six5 PE=1 SV=2	Six5	129362056	9	8.11181	1529	96.4061		AGVRNPQQHL	Polyadenylate-binding protein 1 OS=Mus musculus OX=10090 GN=Pabpc1 PE=1 SV=2	Pabpc1	70713760	10	7.8495	570	90.9091
LGLGLGLG	Inactive ribonuclease-like protein 10 OS=Mus musculus OX=10090 GN=Rnase10 PE=1 SV=1;Ectonucleotide pyrophosphatase/phosphodiesterase family member 3 OS=Mus musculus OX=10090 GN=Enpp3 PE=1 SV=2	Rnase10	127855882	8	8.10672	1528	96.343		RTVENVTVF	Synaptic vesicle membrane protein VAT-1 homolog OS=Mus musculus OX=10090 GN=Vat1 PE=1 SV=3	Vat1	70703152	9	7.84944	569	90.7496
GIGQDIQPKRDL	60S ribosomal protein L7a OS=Mus musculus OX=10090 GN=Rpl7a PE=1 SV=2	Rpl7a	127082482	12	8.10409	1527	96.2799		IYDKDPEGTVQP	Cysteine-rich protein 2 OS=Mus musculus OX=10090 GN=Crip2 PE=1 SV=1	Crip2	70508760	12	7.84824	568	90.5901
SSSPGGAYVTR	Vimentin OS=Mus musculus OX=10090 GN=Vim PE=1 SV=3	Vim	118023656	11	8.07197	1526	96.2169		FGIHNGVETL	Glycerophosphocholine phosphodiesterase GPCPD1 OS=Mus musculus OX=10090 GN=Gpcpd1 PE=1 SV=1	Gpcpd1	70443208	10	7.84784	567	90.4306
KIGGIGTVPVG	Elongation factor 1-alpha 1 OS=Mus musculus OX=10090 GN=Eef1a1 PE=1 SV=3	Eef1a1	115222304	11	8.06154	1525	96.1538		IGGIGTVPVGR	Elongation factor 1-alpha 1 OS=Mus musculus OX=10090 GN=Eef1a1 PE=1 SV=3	Eef1a1	68384520	11	7.83496	566	90.2711
KVGIVGKY	60S ribosomal protein L37a OS=Mus musculus OX=10090 GN=Rpl37a PE=1 SV=2	Rpl37a	113878448	8	8.05644	1524	96.0908		FAYEGRDYI	H-2 class I histocompatibility antigen, D-B alpha chain OS=Mus musculus OX=10090 GN=H2-D1 PE=1 SV=2	H2-D1	67252368	9	7.82771	565	90.1116
TSVRFTQL	Nitric oxide synthase-interacting protein OS=Mus musculus OX=10090 GN=Nosip PE=1 SV=1	Nosip	113799392	8	8.05614	1523	96.0277		SSIVNKEGL	Tropomodulin-1 OS=Mus musculus OX=10090 GN=Tmod1 PE=1 SV=2	Tmod1	63319244	9	7.80154	564	89.9522
TGPSNVDKL	Serine/threonine-protein kinase Chk1 OS=Mus musculus OX=10090 GN=Chek1 PE=1 SV=2	Chek1	111972336	9	8.04911	1522	95.9647		KKPAGATP	Histone H1.5 OS=Mus musculus OX=10090 GN=H1-5 PE=1 SV=2	H1-5	61998393	8	7.79238	563	89.7927
VESFSDYPPLGR	Elongation factor 1-alpha 1 OS=Mus musculus OX=10090 GN=Eef1a1 PE=1 SV=3	Eef1a1	111761336	12	8.04829	1521	95.9016		ASLLEEADY	Titin OS=Mus musculus OX=10090 GN=Ttn PE=1 SV=1	Ttn	60396844	9	7.78101	562	89.6332
VAPEFRRL	N-alpha-acetyltransferase 20 OS=Mus musculus OX=10090 GN=Naa20 PE=1 SV=1	Naa20	110026336	8	8.0415	1520	95.8386		ATLKDITRRL	ATP synthase subunit gamma, mitochondrial OS=Mus musculus OX=10090 GN=Atp5f1c PE=1 SV=1	Atp5f1c	59863500	10	7.77716	561	89.4737
LPNLQVLD	Leucine-rich repeat-containing G-protein coupled receptor 5 OS=Mus musculus OX=10090 GN=Lgr5 PE=2 SV=2	Lgr5	109962808	8	8.04125	1519	95.7755		SGYKFGVL	General transcription factor IIE subunit 2 OS=Mus musculus OX=10090 GN=Gtf2e2 PE=1 SV=2	Gtf2e2	59439776	8	7.77408	560	89.3142
ATIINEEVL	Signal recognition particle 54 kDa protein OS=Mus musculus OX=10090 GN=Srp54 PE=1 SV=2	Srp54	109731000	9	8.04033	1518	95.7125		AAMKNVTEL	14-3-3 protein gamma OS=Mus musculus OX=10090 GN=Ywhag PE=1 SV=2	Ywhag	55657588	9	7.74552	559	89.1547
TLLIKTVETR	Vimentin OS=Mus musculus OX=10090 GN=Vim PE=1 SV=3	Vim	109022536	10	8.03752	1517	95.6494		RAYLFAHV	Pre-rRNA-processing protein TSR1 homolog OS=Mus musculus OX=10090 GN=Tsr1 PE=1 SV=1	Tsr1	55306136	8	7.74277	558	88.9952
VGVNGFGR	Glyceraldehyde-3-phosphate dehydrogenase OS=Mus musculus OX=10090 GN=Gapdh PE=1 SV=2	Gapdh	108847304	8	8.03682	1516	95.5864		SGLLNQQSL	Mediator of RNA polymerase II transcription subunit 27 OS=Mus musculus OX=10090 GN=Med27 PE=2 SV=2	Med27	55099888	9	7.74115	557	88.8357
LEDPQTHSNRIY	Heat shock protein HSP 90-beta OS=Mus musculus OX=10090 GN=Hsp90ab1 PE=1 SV=3	Hsp90ab1	108712807	12	8.03628	1515	95.5233		SGPTNEDLYI	3-hydroxy-3-methylglutaryl-coenzyme A reductase OS=Mus musculus OX=10090 GN=Hmgcr PE=1 SV=3	Hmgcr	54804632	10	7.73882	556	88.6762
DAGAGIALNDNF	Glyceraldehyde-3-phosphate dehydrogenase OS=Mus musculus OX=10090 GN=Gapdh PE=1 SV=2	Gapdh	108272984	12	8.03452	1514	95.4603		VAFDFTKV	Phosphatidylinositol-binding clathrin assembly protein OS=Mus musculus OX=10090 GN=Picalm PE=1 SV=1	Picalm	53636228	8	7.72946	555	88.5167
KQTINPILL	Long-chain-fatty-acid--CoA ligase 3 OS=Mus musculus OX=10090 GN=Acsl3 PE=1 SV=2	Acsl3	108012968	9	8.03348	1513	95.3972		GAVKNLTYF	CMP-N-acetylneuraminate-beta-galactosamide-alpha-2,3-sialyltransferase 4 OS=Mus musculus OX=10090 GN=St3gal4 PE=1 SV=1	St3gal4	53181640	9	7.72576	554	88.3573
VGIENIHVM	Myotubularin-related protein 6 OS=Mus musculus OX=10090 GN=Mtmr6 PE=1 SV=1	Mtmr6	107394952	9	8.03098	1512	95.3342		SGLKYVNV	Adenylate kinase isoenzyme 6 OS=Mus musculus OX=10090 GN=Ak6 PE=1 SV=1	Ak6	51905648	8	7.71521	553	88.1978
NEATGGKYVP	Tubulin beta-5 chain OS=Mus musculus OX=10090 GN=Tubb5 PE=1 SV=1;Tubulin beta-4B chain OS=Mus musculus OX=10090 GN=Tubb4b PE=1 SV=1	Tubb5	107194280	10	8.03017	1511	95.2711		SQHVNLDQL	Beclin 1-associated autophagy-related key regulator OS=Mus musculus OX=10090 GN=Atg14 PE=1 SV=1	Atg14	51167208	9	7.70899	552	88.0383
RDSAYISSS	Protein TANC2 OS=Mus musculus OX=10090 GN=Tanc2 PE=1 SV=1	Tanc2	107097886	9	8.02978	1510	95.2081		TAQVIILNHPG	Elongation factor 1-alpha 1 OS=Mus musculus OX=10090 GN=Eef1a1 PE=1 SV=3	Eef1a1	51151608	11	7.70886	551	87.8788
KIKIIAPPERKY	Actin, cytoplasmic 1 OS=Mus musculus OX=10090 GN=Actb PE=1 SV=1;Actin, alpha cardiac muscle 1 OS=Mus musculus OX=10090 GN=Actc1 PE=1 SV=1	Actb	106765292	12	8.02843	1509	95.145		RQPSIELPSM	Lymphocyte-specific protein 1 OS=Mus musculus OX=10090 GN=Lsp1 PE=1 SV=2	Lsp1	51130964	10	7.70868	550	87.7193
KKDWYDVKAP	40S ribosomal protein S3a OS=Mus musculus OX=10090 GN=Rps3a PE=1 SV=3	Rps3a	106379704	10	8.02686	1508	95.082		HGFREGTTP	60S ribosomal protein L37 OS=Mus musculus OX=10090 GN=Rpl37 PE=3 SV=3	Rpl37	50458016	9	7.70293	549	87.5598
GKLTGMAF	Glyceraldehyde-3-phosphate dehydrogenase OS=Mus musculus OX=10090 GN=Gapdh PE=1 SV=2	Gapdh	106290184	8	8.02649	1507	95.0189		IREEYPDRIM	Tubulin beta-5 chain OS=Mus musculus OX=10090 GN=Tubb5 PE=1 SV=1;Tubulin beta-4B chain OS=Mus musculus OX=10090 GN=Tubb4b PE=1 SV=1	Tubb5	50216560	10	7.70085	548	87.4003
AREIFDSRGNP	Alpha-enolase OS=Mus musculus OX=10090 GN=Eno1 PE=1 SV=3	Eno1	106058360	11	8.02554	1506	94.9559		FIDTTSKF	60S ribosomal protein L3 OS=Mus musculus OX=10090 GN=Rpl3 PE=1 SV=3	Rpl3	50184356	8	7.70057	547	87.2408
KNLQTVNVDEN	60S ribosomal protein L31 OS=Mus musculus OX=10090 GN=Rpl31 PE=1 SV=1	Rpl31	105004104	11	8.02121	1505	94.8928		LQHSPTILQ	Kinesin-like protein KIF20B OS=Mus musculus OX=10090 GN=Kif20b PE=1 SV=3	Kif20b	49681776	9	7.6962	546	87.0813
VMYKFLTV	Caveolin-2 OS=Mus musculus OX=10090 GN=Cav2 PE=1 SV=1	Cav2	104384176	8	8.01863	1504	94.8298		REPDTFMDQKI	Cadherin-1 OS=Mus musculus OX=10090 GN=Cdh1 PE=1 SV=1	Cdh1	48272700	11	7.6837	545	86.9219
TLIRPDGEKKAY	60S ribosomal protein L23a OS=Mus musculus OX=10090 GN=Rpl23a PE=1 SV=1	Rpl23a	1.03562e+08	12	8.0152	1503	94.7667		KAPDNRETL	Dolichyl-diphosphooligosaccharide--protein glycosyltransferase subunit STT3B OS=Mus musculus OX=10090 GN=Stt3b PE=1 SV=2	Stt3b	48228344	9	7.6833	544	86.7624
KAPTNEFYA	Syndecan-4 OS=Mus musculus OX=10090 GN=Sdc4 PE=1 SV=1	Sdc4	103490584	9	8.0149	1502	94.7037		SQPVNPHSL	Zinc finger SWIM domain-containing protein 8 OS=Mus musculus OX=10090 GN=Zswim8 PE=1 SV=1	Zswim8	47410788	9	7.67588	543	86.6029
YLAPKIEDEEAS	Proliferating cell nuclear antigen OS=Mus musculus OX=10090 GN=Pcna PE=1 SV=2	Pcna	103480040	12	8.01486	1501	94.6406		IAFSCPVFT	Solute carrier family 35 member G1 OS=Mus musculus OX=10090 GN=Slc35g1 PE=2 SV=1	Slc35g1	47313623	9	7.67499	542	86.4434
SETGAGKHVPR	Tubulin alpha-1A chain OS=Mus musculus OX=10090 GN=Tuba1a PE=1 SV=1;Tubulin alpha-1C chain OS=Mus musculus OX=10090 GN=Tuba1c PE=1 SV=1	Tuba1a	101622776	11	8.00699	1500	94.5776		SLGKNPTDAYL	Myosin regulatory light chain 12B OS=Mus musculus OX=10090 GN=Myl12b PE=1 SV=2	Myl12b	47269108	11	7.67458	541	86.2839
FGQSGAGNNW	Tubulin beta-3 chain OS=Mus musculus OX=10090 GN=Tubb3 PE=1 SV=1;Tubulin beta-5 chain OS=Mus musculus OX=10090 GN=Tubb5 PE=1 SV=1;Tubulin beta-4B chain OS=Mus musculus OX=10090 GN=Tubb4b PE=1 SV=1	Tubb3	99820624	10	7.99922	1499	94.5145		SSYTFPKM	Enoyl-CoA delta isomerase 2 OS=Mus musculus OX=10090 GN=Eci2 PE=1 SV=2	Eci2	46693208	8	7.66925	540	86.1244
LRDNSTMGY	Heat shock protein HSP 90-alpha OS=Mus musculus OX=10090 GN=Hsp90aa1 PE=1 SV=4;Heat shock protein HSP 90-beta OS=Mus musculus OX=10090 GN=Hsp90ab1 PE=1 SV=3	Hsp90aa1	99267384	9	7.99681	1498	94.4515		AAITNKYQL	RNA polymerase I-specific transcription initiation factor RRN3 OS=Mus musculus OX=10090 GN=Rrn3 PE=1 SV=1	Rrn3	46489312	9	7.66735	539	85.9649
IGITNHDEY	Talin-1 OS=Mus musculus OX=10090 GN=Tln1 PE=1 SV=2	Tln1	97910568	9	7.99083	1497	94.3884		AGPTNVHLI	Homeobox protein SIX5 OS=Mus musculus OX=10090 GN=Six5 PE=1 SV=2	Six5	46487780	9	7.66734	538	85.8054
ERPTYTNL	Tubulin alpha-8 chain OS=Mus musculus OX=10090 GN=Tuba8 PE=1 SV=1;Tubulin alpha-1A chain OS=Mus musculus OX=10090 GN=Tuba1a PE=1 SV=1;Tubulin alpha-1C chain OS=Mus musculus OX=10090 GN=Tuba1c PE=1 SV=1	Tuba8	97324360	8	7.98822	1496	94.3253		SMVQNRVFL	Dedicator of cytokinesis protein 2 OS=Mus musculus OX=10090 GN=Dock2 PE=1 SV=3	Dock2	46177812	9	7.66443	537	85.6459
KGPEGERPA	40S ribosomal protein S10 OS=Mus musculus OX=10090 GN=Rps10 PE=1 SV=1	Rps10	96142336	9	7.98291	1495	94.2623		NGPQNIYNL	Ribonuclease kappa OS=Mus musculus OX=10090 GN=Rnasek PE=3 SV=1	Rnasek	45354144	9	7.65662	536	85.4864
LAPKIEDEEAS	Proliferating cell nuclear antigen OS=Mus musculus OX=10090 GN=Pcna PE=1 SV=2	Pcna	92818632	11	7.96764	1494	94.1992		VDQLDFWE	Neuronal acetylcholine receptor subunit alpha-4 OS=Mus musculus OX=10090 GN=Chrna4 PE=1 SV=2	Chrna4	44272464	8	7.64613	535	85.327
IPGKDPDSP	Transmembrane glycoprotein NMB OS=Mus musculus OX=10090 GN=Gpnmb PE=1 SV=2	Gpnmb	92539528	9	7.96633	1493	94.1362		GSVRNAVVL	WD repeat- and FYVE domain-containing protein 4 OS=Mus musculus OX=10090 GN=Wdfy4 PE=1 SV=2	Wdfy4	44243092	9	7.64585	534	85.1675
KIGGIGTVP	Elongation factor 1-alpha 1 OS=Mus musculus OX=10090 GN=Eef1a1 PE=1 SV=3	Eef1a1	92136056	9	7.96443	1492	94.0731		VSILNRQVL	Nuclear mitotic apparatus protein 1 OS=Mus musculus OX=10090 GN=Numa1 PE=1 SV=1	Numa1	44207108	9	7.64549	533	85.008
PEPAKSAPAPK	Histone H2B type 1-F/J/L OS=Mus musculus OX=10090 GN=H2bc7 PE=1 SV=2	H2bc7	91513728	11	7.96149	1491	94.0101		SSLVNSQTL	TGF-beta-activated kinase 1 and MAP3K7-binding protein 2 OS=Mus musculus OX=10090 GN=Tab2 PE=1 SV=1	Tab2	43426024	9	7.63775	532	84.8485
VSLLNPPETL	Cyclin-A2 OS=Mus musculus OX=10090 GN=Ccna2 PE=1 SV=2	Ccna2	91004192	10	7.95906	1490	93.947		KTVVNKDVF	60S ribosomal protein L27 OS=Mus musculus OX=10090 GN=Rpl27 PE=1 SV=2	Rpl27	43175896	9	7.63524	531	84.689
AAVIAHDFL	G1/S-specific cyclin-D3 OS=Mus musculus OX=10090 GN=Ccnd3 PE=1 SV=1	Ccnd3	90076328	9	7.95461	1489	93.884		YNEATGGKYVP	Tubulin beta-5 chain OS=Mus musculus OX=10090 GN=Tubb5 PE=1 SV=1;Tubulin beta-4B chain OS=Mus musculus OX=10090 GN=Tubb4b PE=1 SV=1	Tubb5	43057696	11	7.63405	530	84.5295
SLAQKKDRVAQ	60S ribosomal protein L5 OS=Mus musculus OX=10090 GN=Rpl5 PE=1 SV=3	Rpl5	89046408	11	7.94962	1488	93.8209		GAVTNVKVI	ELAV-like protein 3 OS=Mus musculus OX=10090 GN=Elavl3 PE=1 SV=1	Elavl3	41492720	9	7.61797	529	84.37
RTIGISVDPRR	60S ribosomal protein L13 OS=Mus musculus OX=10090 GN=Rpl13 PE=1 SV=3	Rpl13	88365624	11	7.94628	1487	93.7579		TGPSNVDKL	Serine/threonine-protein kinase Chk1 OS=Mus musculus OX=10090 GN=Chek1 PE=1 SV=2	Chek1	41129424	9	7.61415	528	84.2105
SAIMNPASKVI	Clathrin heavy chain 1 OS=Mus musculus OX=10090 GN=Cltc PE=1 SV=3	Cltc	88282272	11	7.94587	1486	93.6948		QSLVFKLS	Adhesion G-protein coupled receptor G5 OS=Mus musculus OX=10090 GN=Adgrg5 PE=1 SV=3	Adgrg5	41089060	8	7.61373	527	84.051
KAPDNRETL	Dolichyl-diphosphooligosaccharide--protein glycosyltransferase subunit STT3B OS=Mus musculus OX=10090 GN=Stt3b PE=1 SV=2	Stt3b	87866568	9	7.94382	1485	93.6318		RNYSYEKL	Junction plakoglobin OS=Mus musculus OX=10090 GN=Jup PE=1 SV=3	Jup	40326016	8	7.60559	526	83.8915
AMGVNLTSM	Proliferating cell nuclear antigen OS=Mus musculus OX=10090 GN=Pcna PE=1 SV=2	Pcna	86970864	9	7.93937	1484	93.5687		VQNKNSSYF	Tubulin beta-5 chain OS=Mus musculus OX=10090 GN=Tubb5 PE=1 SV=1;Tubulin beta-4B chain OS=Mus musculus OX=10090 GN=Tubb4b PE=1 SV=1	Tubb5	40013208	9	7.6022	525	83.7321
KDTVYCVAYAK	Intraflagellar transport protein 122 homolog OS=Mus musculus OX=10090 GN=Ift122 PE=1 SV=1	Ift122	86789727	11	7.93847	1483	93.5057		NGVINAAFM	Phosphatidylinositol-binding clathrin assembly protein OS=Mus musculus OX=10090 GN=Picalm PE=1 SV=1	Picalm	39779736	9	7.59966	524	83.5726
YNEATGGKYVPR	Tubulin beta-5 chain OS=Mus musculus OX=10090 GN=Tubb5 PE=1 SV=1;Tubulin beta-4B chain OS=Mus musculus OX=10090 GN=Tubb4b PE=1 SV=1	Tubb5	8.53361e+07	12	7.93113	1482	93.4426		PNRVTKVAVK	Fibroblast growth factor receptor 1 OS=Mus musculus OX=10090 GN=Fgfr1 PE=1 SV=2	Fgfr1	39718488	10	7.59899	523	83.4131
KSMENLIEL	Tubby-related protein 3 OS=Mus musculus OX=10090 GN=Tulp3 PE=1 SV=1	Tulp3	85165104	9	7.93026	1481	93.3796		KIGGIGTVPVG	Elongation factor 1-alpha 1 OS=Mus musculus OX=10090 GN=Eef1a1 PE=1 SV=3	Eef1a1	39606896	11	7.59777	522	83.2536
ESILGGVLK	Dedicator of cytokinesis protein 7 OS=Mus musculus OX=10090 GN=Dock7 PE=1 SV=3	Dock7	82961456	9	7.91888	1480	93.3165		YAPINANAI	Metastasis-associated protein MTA2 OS=Mus musculus OX=10090 GN=Mta2 PE=1 SV=1	Mta2	38621516	9	7.58683	521	83.0941
AVLSAEKLRDE	Serpin H1 OS=Mus musculus OX=10090 GN=Serpinh1 PE=1 SV=3	Serpinh1	82606643	11	7.91701	1479	93.2535		SSLESSFTL	Dedicator of cytokinesis protein 11 OS=Mus musculus OX=10090 GN=Dock11 PE=1 SV=1	Dock11	38249832	9	7.58263	520	82.9346
TEDVPRKLL	60S ribosomal protein L6 OS=Mus musculus OX=10090 GN=Rpl6 PE=1 SV=3	Rpl6	82516752	9	7.91654	1478	93.1904		VNIEFKDL	ATP-binding cassette sub-family G member 1 OS=Mus musculus OX=10090 GN=Abcg1 PE=1 SV=1	Abcg1	37931704	8	7.579	519	82.7751
AVGDIPGVRF	40S ribosomal protein S23 OS=Mus musculus OX=10090 GN=Rps23 PE=1 SV=3	Rps23	81298008	10	7.91008	1477	93.1274		AQYGNILKHVM	Nucleoporin NUP35 OS=Mus musculus OX=10090 GN=Nup35 PE=1 SV=2	Nup35	37708600	11	7.57644	518	82.6156
FFMPGFAPL	Tubulin beta-3 chain OS=Mus musculus OX=10090 GN=Tubb3 PE=1 SV=1;Tubulin beta-5 chain OS=Mus musculus OX=10090 GN=Tubb5 PE=1 SV=1;Tubulin beta-4B chain OS=Mus musculus OX=10090 GN=Tubb4b PE=1 SV=1;Tubulin beta-6 chain OS=Mus musculus OX=10090 GN=Tubb6 PE=1 SV=1	Tubb3	79953840	9	7.90284	1476	93.0643		SEGKPAAEEL	Syntaxin-18 OS=Mus musculus OX=10090 GN=Stx18 PE=1 SV=2	Stx18	37529604	10	7.57437	517	82.4561
GINKIGGMEGP	Heterogeneous nuclear ribonucleoprotein M OS=Mus musculus OX=10090 GN=Hnrnpm PE=1 SV=3	Hnrnpm	79628480	11	7.90107	1475	93.0013		NEATGGKYVP	Tubulin beta-5 chain OS=Mus musculus OX=10090 GN=Tubb5 PE=1 SV=1;Tubulin beta-4B chain OS=Mus musculus OX=10090 GN=Tubb4b PE=1 SV=1	Tubb5	36455268	10	7.56176	516	82.2967
VTVNESLLAP	Keratin, type II cytoskeletal 71 OS=Mus musculus OX=10090 GN=Krt71 PE=1 SV=1	Krt71	78203856	10	7.89323	1474	92.9382		KVGIVGKY	60S ribosomal protein L37a OS=Mus musculus OX=10090 GN=Rpl37a PE=1 SV=2	Rpl37a	36289352	8	7.55978	515	82.1372
KATKYLKDVTLK	60S ribosomal protein L17 OS=Mus musculus OX=10090 GN=Rpl17 PE=1 SV=3	Rpl17	77617802	12	7.88996	1473	92.8752		HAIRNSFQYL	Myotubularin-related protein 4 OS=Mus musculus OX=10090 GN=Mtmr4 PE=1 SV=1	Mtmr4	35844940	10	7.55443	514	81.9777
ELNGKLTGMAF	Glyceraldehyde-3-phosphate dehydrogenase OS=Mus musculus OX=10090 GN=Gapdh PE=1 SV=2	Gapdh	76712464	11	7.88487	1472	92.8121		NDFVFVSSSS	DmX-like protein 1 OS=Mus musculus OX=10090 GN=Dmxl1 PE=1 SV=1	Dmxl1	35688024	10	7.55252	513	81.8182
AVTVAPPGAR	Heterogeneous nuclear ribonucleoprotein U OS=Mus musculus OX=10090 GN=Hnrnpu PE=1 SV=1	Hnrnpu	75892680	10	7.8802	1471	92.7491		YLAPKIEDEEAS	Proliferating cell nuclear antigen OS=Mus musculus OX=10090 GN=Pcna PE=1 SV=2	Pcna	35447440	12	7.54958	512	81.6587
QASEGPLKGILG	Glyceraldehyde-3-phosphate dehydrogenase OS=Mus musculus OX=10090 GN=Gapdh PE=1 SV=2	Gapdh	75756040	12	7.87942	1470	92.686		VESFSDYPPLGR	Elongation factor 1-alpha 1 OS=Mus musculus OX=10090 GN=Eef1a1 PE=1 SV=3	Eef1a1	35190692	12	7.54643	511	81.4992
WALERAKL	Uronyl 2-sulfotransferase OS=Mus musculus OX=10090 GN=Ust PE=2 SV=3	Ust	75666432	8	7.8789	1469	92.623		SPGGAYVTRSS	Vimentin OS=Mus musculus OX=10090 GN=Vim PE=1 SV=3	Vim	34807848	11	7.54168	510	81.3397
PRPPPKPM	40S ribosomal protein S26 OS=Mus musculus OX=10090 GN=Rps26 PE=1 SV=3	Rps26	73209736	8	7.86457	1468	92.5599		KNLQTVNVDEN	60S ribosomal protein L31 OS=Mus musculus OX=10090 GN=Rpl31 PE=1 SV=1	Rpl31	34775460	11	7.54127	509	81.1802
IGPKNYEFL	Sorting nexin-14 OS=Mus musculus OX=10090 GN=Snx14 PE=1 SV=2	Snx14	73165416	9	7.86431	1467	92.4968		PPKVPPLG	Zinc finger protein 574 OS=Mus musculus OX=10090 GN=Znf574 PE=1 SV=1	Znf574	3.44076e+07	8	7.53665	508	81.0207
SALTNMVGSMF	Armadillo-like helical domain-containing protein 3 OS=Mus musculus OX=10090 GN=Armh3 PE=1 SV=2	Armh3	72750108	11	7.86183	1466	92.4338		KALMVYFH	EF-hand calcium-binding domain-containing protein 9 OS=Mus musculus OX=10090 GN=Efcab9 PE=1 SV=2	Efcab9	33874432	8	7.52987	507	80.8612
IGGIGTVPVGR	Elongation factor 1-alpha 1 OS=Mus musculus OX=10090 GN=Eef1a1 PE=1 SV=3	Eef1a1	72429248	11	7.85991	1465	92.3707		SETGAGKHVPR	Tubulin alpha-1B chain OS=Mus musculus OX=10090 GN=Tuba1b PE=1 SV=2	Tuba1b	33660880	11	7.52713	506	80.7018
ISPENHISL	Interferon-inducible double-stranded RNA-dependent protein kinase activator A OS=Mus musculus OX=10090 GN=Prkra PE=1 SV=1	Prkra	72334888	9	7.85935	1464	92.3077		VGVNGFGR	Glyceraldehyde-3-phosphate dehydrogenase OS=Mus musculus OX=10090 GN=Gapdh PE=1 SV=2	Gapdh	32599664	8	7.51321	505	80.5423
TLLRDRDEL	Endoplasmic reticulum resident protein 44 OS=Mus musculus OX=10090 GN=Erp44 PE=1 SV=1	Erp44	71517443	9	7.85441	1463	92.2446		GKLTGMAF	Glyceraldehyde-3-phosphate dehydrogenase OS=Mus musculus OX=10090 GN=Gapdh PE=1 SV=2	Gapdh	31609832	8	7.49982	504	80.3828
RIEVNVEL	Importin subunit alpha-1 OS=Mus musculus OX=10090 GN=Kpna2 PE=1 SV=2	Kpna2	70851328	8	7.85035	1462	92.1816		RAYRYLQL	Cytochrome c oxidase assembly protein COX14 OS=Mus musculus OX=10090 GN=Cox14 PE=3 SV=1	Cox14	31122509	8	7.49307	503	80.2233
VAFDFTKV	Phosphatidylinositol-binding clathrin assembly protein OS=Mus musculus OX=10090 GN=Picalm PE=1 SV=1	Picalm	69960448	8	7.84485	1461	92.1185		ERPTYTNL	Tubulin alpha-1B chain OS=Mus musculus OX=10090 GN=Tuba1b PE=1 SV=2	Tuba1b	31008054	8	7.49147	502	80.0638
KLIEVDDERKLR	40S ribosomal protein S6 OS=Mus musculus OX=10090 GN=Rps6 PE=1 SV=1	Rps6	69677028	12	7.84309	1460	92.0555		VGYRYETL	AMP deaminase 2 OS=Mus musculus OX=10090 GN=Ampd2 PE=1 SV=1	Ampd2	30778018	8	7.48824	501	79.9043
PAHILQEISGAY	Stearoyl-CoA desaturase 2 OS=Mus musculus OX=10090 GN=Scd2 PE=1 SV=2	Scd2	69584152	12	7.84251	1459	91.9924		RQYIFSKL	Interferon-induced very large GTPase 1 OS=Mus musculus OX=10090 GN=Gvin1 PE=1 SV=1	Gvin1	30658608	8	7.48655	500	79.7448
KLVFLGEQSV	Ras-related protein Rab-6A OS=Mus musculus OX=10090 GN=Rab6a PE=1 SV=4	Rab6a	69450240	10	7.84167	1458	91.9294		LVASPQMPII	Zinc finger protein 804A OS=Mus musculus OX=10090 GN=Znf804a PE=2 SV=1	Znf804a	30630222	10	7.48615	499	79.5853
GQLSNGDHHFM	YTH domain-containing family protein 1 OS=Mus musculus OX=10090 GN=Ythdf1 PE=1 SV=1	Ythdf1	69263508	11	7.8405	1457	91.8663		PRPPPKPM	40S ribosomal protein S26 OS=Mus musculus OX=10090 GN=Rps26 PE=1 SV=3	Rps26	30218722	8	7.48028	498	79.4258
VIVRFLTV	40S ribosomal protein S15a OS=Mus musculus OX=10090 GN=Rps15a PE=1 SV=2	Rps15a	68830384	8	7.83778	1456	91.8033		AIRVTNPNAR	60S ribosomal protein L32 OS=Mus musculus OX=10090 GN=Rpl32 PE=1 SV=2	Rpl32	30072994	10	7.47818	497	79.2663
DVNAAIATIK	Tubulin alpha-1A chain OS=Mus musculus OX=10090 GN=Tuba1a PE=1 SV=1;Tubulin alpha-1C chain OS=Mus musculus OX=10090 GN=Tuba1c PE=1 SV=1	Tuba1a	67093028	10	7.82668	1455	91.7402		SKYDFPKL	T-cell-specific guanine nucleotide triphosphate-binding protein 1 OS=Mus musculus OX=10090 GN=Tgtp1 PE=1 SV=1	Tgtp1	30036700	8	7.47765	496	79.1069
IIVLAKKMCMI	Catenin alpha-3 OS=Mus musculus OX=10090 GN=Ctnna3 PE=1 SV=2	Ctnna3	66729696	11	7.82432	1454	91.6772		SQLVKADEM	DnaJ homolog subfamily C member 3 OS=Mus musculus OX=10090 GN=Dnajc3 PE=1 SV=1	Dnajc3	29811046	9	7.47438	495	78.9474
RAYLFAHV	Pre-rRNA-processing protein TSR1 homolog OS=Mus musculus OX=10090 GN=Tsr1 PE=1 SV=1	Tsr1	66697292	8	7.82411	1453	91.6141		RSYDFEFM	Vacuolar protein sorting-associated protein 26A OS=Mus musculus OX=10090 GN=Vps26a PE=1 SV=1	Vps26a	29150594	8	7.46465	494	78.7879
EDPQTHSNRIY	Heat shock protein HSP 90-beta OS=Mus musculus OX=10090 GN=Hsp90ab1 PE=1 SV=3	Hsp90ab1	65968463	11	7.81934	1452	91.5511		DVQLQESGPG	Ig heavy chain V region MOPC 315 OS=Mus musculus OX=10090 PE=1 SV=2	?	29071814	10	7.46347	493	78.6284
GQLSNGDHHF	YTH domain-containing family protein 1 OS=Mus musculus OX=10090 GN=Ythdf1 PE=1 SV=1	Ythdf1	65696432	10	7.81754	1451	91.488		AAVIAHDFL	G1/S-specific cyclin-D3 OS=Mus musculus OX=10090 GN=Ccnd3 PE=1 SV=1	Ccnd3	28796470	9	7.45934	492	78.4689
AIRNMNTL	E3 ubiquitin-protein ligase synoviolin OS=Mus musculus OX=10090 GN=Syvn1 PE=1 SV=3	Syvn1	64042100	8	7.80647	1450	91.425		FVEQIRSQV	Small glutamine-rich tetratricopeptide repeat-containing protein alpha OS=Mus musculus OX=10090 GN=Sgta PE=1 SV=2	Sgta	28311058	9	7.45196	491	78.3094
GIQKELQF	L-lactate dehydrogenase A chain OS=Mus musculus OX=10090 GN=Ldha PE=1 SV=3	Ldha	64006344	8	7.80622	1449	91.3619		LEDPQTHSNRIY	Heat shock protein HSP 90-beta OS=Mus musculus OX=10090 GN=Hsp90ab1 PE=1 SV=3	Hsp90ab1	28116846	12	7.44897	490	78.1499
FHSGTPAASF	Ubiquitin-associated protein 2-like OS=Mus musculus OX=10090 GN=Ubap2l PE=1 SV=1	Ubap2l	63542768	10	7.80307	1448	91.2989		TGIKNGVHFL	Prolactin regulatory element-binding protein OS=Mus musculus OX=10090 GN=Preb PE=1 SV=1	Preb	27946825	10	7.44633	489	77.9904
KGPEGERPARF	40S ribosomal protein S10 OS=Mus musculus OX=10090 GN=Rps10 PE=1 SV=1	Rps10	63077096	11	7.79987	1447	91.2358		SGYIYHKL	Regulator of nonsense transcripts 1 OS=Mus musculus OX=10090 GN=Upf1 PE=1 SV=2	Upf1	27739252	8	7.44309	488	77.8309
AAPSNLPYL	Dual specificity protein phosphatase 4 OS=Mus musculus OX=10090 GN=Dusp4 PE=2 SV=1	Dusp4	63062100	9	7.79977	1446	91.1728		IGITNHDEY	Talin-1 OS=Mus musculus OX=10090 GN=Tln1 PE=1 SV=2	Tln1	27559824	9	7.44028	487	77.6715
AAITNKYQL	RNA polymerase I-specific transcription initiation factor RRN3 OS=Mus musculus OX=10090 GN=Rrn3 PE=1 SV=1	Rrn3	63017808	9	7.79946	1445	91.1097		RNFIFSRL	Lymphocyte-specific helicase OS=Mus musculus OX=10090 GN=Hells PE=1 SV=2	Hells	27432612	8	7.43827	486	77.512
AVGKVIPELNGK	Glyceraldehyde-3-phosphate dehydrogenase OS=Mus musculus OX=10090 GN=Gapdh PE=1 SV=2	Gapdh	62282240	12	7.79436	1444	91.0467		ATIINEEVL	Signal recognition particle 54 kDa protein OS=Mus musculus OX=10090 GN=Srp54 PE=1 SV=2	Srp54	26899458	9	7.42974	485	77.3525
RQLFHPEQLITG	Tubulin alpha-8 chain OS=Mus musculus OX=10090 GN=Tuba8 PE=1 SV=1;Tubulin alpha-1A chain OS=Mus musculus OX=10090 GN=Tuba1a PE=1 SV=1;Tubulin alpha-1C chain OS=Mus musculus OX=10090 GN=Tuba1c PE=1 SV=1	Tuba8	62023519	12	7.79256	1443	90.9836		TKAEMSHI	Transient receptor potential cation channel subfamily M member 7 OS=Mus musculus OX=10090 GN=Trpm7 PE=1 SV=1	Trpm7	26842790	8	7.42883	484	77.193
TRGEADRDTY	40S ribosomal protein S10 OS=Mus musculus OX=10090 GN=Rps10 PE=1 SV=1	Rps10	61543496	10	7.78918	1442	90.9206		TLIRPDGEKKAY	60S ribosomal protein L23a OS=Mus musculus OX=10090 GN=Rpl23a PE=1 SV=1	Rpl23a	26728459	12	7.42697	483	77.0335
AAPISPWTM	Zinc finger protein 746 OS=Mus musculus OX=10090 GN=Znf746 PE=1 SV=3	Znf746	60996912	9	7.78531	1441	90.8575		RVAEFTTNL	Myosin-9 OS=Mus musculus OX=10090 GN=Myh9 PE=1 SV=4	Myh9	26593544	9	7.42478	482	76.874
KVVKVANVSLL	40S ribosomal protein S23 OS=Mus musculus OX=10090 GN=Rps23 PE=1 SV=3	Rps23	60574024	11	7.78229	1440	90.7945		DVQIFNSSS	Mucin-19 OS=Mus musculus OX=10090 GN=Muc19 PE=2 SV=2	Muc19	26435610	9	7.42219	481	76.7145
VKVANVSLLAL	40S ribosomal protein S23 OS=Mus musculus OX=10090 GN=Rps23 PE=1 SV=3	Rps23	60275464	11	7.78014	1439	90.7314		ELNGKLTGMAF	Glyceraldehyde-3-phosphate dehydrogenase OS=Mus musculus OX=10090 GN=Gapdh PE=1 SV=2	Gapdh	25926762	11	7.41375	480	76.555
VRAVRPKVLM	60S ribosomal protein L34 OS=Mus musculus OX=10090 GN=Rpl34 PE=1 SV=2	Rpl34	60264125	10	7.78006	1438	90.6683		SLAQKKDRVAQ	60S ribosomal protein L5 OS=Mus musculus OX=10090 GN=Rpl5 PE=1 SV=3	Rpl5	25914906	11	7.41355	479	76.3955
TAQVIILNHP	Elongation factor 1-alpha 1 OS=Mus musculus OX=10090 GN=Eef1a1 PE=1 SV=3	Eef1a1	59512652	10	7.77461	1437	90.6053		GGVRNGVAL	Nucleolar protein 11 OS=Mus musculus OX=10090 GN=Nol11 PE=2 SV=1	Nol11	25764534	9	7.41102	478	76.236
SNRVVDLMA	Glyceraldehyde-3-phosphate dehydrogenase OS=Mus musculus OX=10090 GN=Gapdh PE=1 SV=2	Gapdh	59223432	9	7.77249	1436	90.5422		VNYRHLALL	DNA-directed RNA polymerase II subunit RPB1 OS=Mus musculus OX=10090 GN=Polr2a PE=1 SV=3	Polr2a	25516070	9	7.40681	477	76.0766
VAISPGKHYL	Protein mono-ADP-ribosyltransferase PARP14 OS=Mus musculus OX=10090 GN=Parp14 PE=1 SV=3	Parp14	58910104	10	7.77019	1435	90.4792		RTIGISVDPRR	60S ribosomal protein L13 OS=Mus musculus OX=10090 GN=Rpl13 PE=1 SV=3	Rpl13	25470612	11	7.40604	476	75.9171
VIPELNGKLTG	Glyceraldehyde-3-phosphate dehydrogenase OS=Mus musculus OX=10090 GN=Gapdh PE=1 SV=2	Gapdh	57697076	11	7.76115	1434	90.4161		KLEDGPKFLK	Elongation factor 1-alpha 1 OS=Mus musculus OX=10090 GN=Eef1a1 PE=1 SV=3	Eef1a1	25438278	10	7.40549	475	75.7576
RVPTPNVSVVDL	Glyceraldehyde-3-phosphate dehydrogenase OS=Mus musculus OX=10090 GN=Gapdh PE=1 SV=2	Gapdh	57329676	12	7.75838	1433	90.3531		VLDKLKAERER	Elongation factor 1-alpha 1 OS=Mus musculus OX=10090 GN=Eef1a1 PE=1 SV=3	Eef1a1	25058150	11	7.39895	474	75.5981
LSKEDDVRQY	40S ribosomal protein S6 OS=Mus musculus OX=10090 GN=Rps6 PE=1 SV=1	Rps6	57110562	10	7.75672	1432	90.29		DVNAAIATIK	Tubulin alpha-1B chain OS=Mus musculus OX=10090 GN=Tuba1b PE=1 SV=2	Tuba1b	25015228	10	7.3982	473	75.4386
KVVPEMTEILK	Electron transfer flavoprotein subunit alpha, mitochondrial OS=Mus musculus OX=10090 GN=Etfa PE=1 SV=2	Etfa	57095996	11	7.75661	1431	90.227		KATKYLKDVTLK	60S ribosomal protein L17 OS=Mus musculus OX=10090 GN=Rpl17 PE=1 SV=3	Rpl17	24851801	12	7.39536	472	75.2791
SKYDFPKL	T-cell-specific guanine nucleotide triphosphate-binding protein 1 OS=Mus musculus OX=10090 GN=Tgtp1 PE=1 SV=1	Tgtp1	56926428	8	7.75531	1430	90.1639		KVVKVANVSLL	40S ribosomal protein S23 OS=Mus musculus OX=10090 GN=Rps23 PE=1 SV=3	Rps23	24844985	11	7.39524	471	75.1196
TGIKNGVHFL	Prolactin regulatory element-binding protein OS=Mus musculus OX=10090 GN=Preb PE=1 SV=1	Preb	56766827	10	7.75409	1429	90.1009		STRVTAEVTT	Uncharacterized protein C11orf24 homolog OS=Mus musculus OX=10090 PE=2 SV=1	?	24623220	10	7.39134	470	74.9601
GAVKNLTYF	CMP-N-acetylneuraminate-beta-galactosamide-alpha-2,3-sialyltransferase 4 OS=Mus musculus OX=10090 GN=St3gal4 PE=1 SV=1	St3gal4	56749332	9	7.75396	1428	90.0378		GEYGFQNAILVR	Albumin OS=Mus musculus OX=10090 GN=Alb PE=1 SV=3	Alb	24562418	12	7.39027	469	74.8006
AIRVTNPNAR	60S ribosomal protein L32 OS=Mus musculus OX=10090 GN=Rpl32 PE=1 SV=2	Rpl32	55674708	10	7.74566	1427	89.9748		KKDWYDVKAP	40S ribosomal protein S3a OS=Mus musculus OX=10090 GN=Rps3a PE=1 SV=3	Rps3a	24209534	10	7.38399	468	74.6411
SSVPGVRLL	Vimentin OS=Mus musculus OX=10090 GN=Vim PE=1 SV=3	Vim	55496620	9	7.74427	1426	89.9117		ASLVNADKL	Vacuolar protein sorting-associated protein 33B OS=Mus musculus OX=10090 GN=Vps33b PE=1 SV=1	Vps33b	24073990	9	7.38155	467	74.4817
TVAVGVIK	Elongation factor 1-alpha 1 OS=Mus musculus OX=10090 GN=Eef1a1 PE=1 SV=3	Eef1a1	55031420	8	7.74061	1425	89.8487		TEDVPRKLL	60S ribosomal protein L6 OS=Mus musculus OX=10090 GN=Rpl6 PE=1 SV=3	Rpl6	2.3961e+07	9	7.37951	466	74.3222
KFIDTTSKF	60S ribosomal protein L3 OS=Mus musculus OX=10090 GN=Rpl3 PE=1 SV=3	Rpl3	55010504	9	7.74045	1424	89.7856		VQLENQMVL	Copper chaperone for superoxide dismutase OS=Mus musculus OX=10090 GN=Ccs PE=1 SV=1	Ccs	23935105	9	7.37904	465	74.1627
VILSFRSL	Nck-associated protein 1 OS=Mus musculus OX=10090 GN=Nckap1 PE=1 SV=2	Nckap1	54928568	8	7.7398	1423	89.7226		SAFSFRTL	F-box only protein 38 OS=Mus musculus OX=10090 GN=Fbxo38 PE=1 SV=1	Fbxo38	23811260	8	7.37678	464	74.0032
NEATGGKYVPR	Tubulin beta-5 chain OS=Mus musculus OX=10090 GN=Tubb5 PE=1 SV=1;Tubulin beta-4B chain OS=Mus musculus OX=10090 GN=Tubb4b PE=1 SV=1	Tubb5	54637088	11	7.73749	1422	89.6595		VGPRYTQL	Mitogen-activated protein kinase 3 OS=Mus musculus OX=10090 GN=Mapk3 PE=1 SV=5	Mapk3	23600114	8	7.37291	463	73.8437
HAIENIDTF	Breast cancer type 2 susceptibility protein homolog OS=Mus musculus OX=10090 GN=Brca2 PE=1 SV=2	Brca2	54555976	9	7.73684	1421	89.5965		ESILGGVLK	Dedicator of cytokinesis protein 7 OS=Mus musculus OX=10090 GN=Dock7 PE=1 SV=3	Dock7	23538326	9	7.37178	462	73.6842
LHFNQIETL	Peroxidasin homolog OS=Mus musculus OX=10090 GN=Pxdn PE=1 SV=2	Pxdn	54401672	9	7.73561	1420	89.5334		IPGKDPDSP	Transmembrane glycoprotein NMB OS=Mus musculus OX=10090 GN=Gpnmb PE=1 SV=2	Gpnmb	23459664	9	7.37032	461	73.5247
ATLVFHNL	Signal transducer and activator of transcription 3 OS=Mus musculus OX=10090 GN=Stat3 PE=1 SV=2	Stat3	53913316	8	7.7317	1419	89.4704		ISGVNGTHI	SRSF protein kinase 1 OS=Mus musculus OX=10090 GN=Srpk1 PE=1 SV=2	Srpk1	23449282	9	7.37013	460	73.3652
SSYTFPKM	Enoyl-CoA delta isomerase 2 OS=Mus musculus OX=10090 GN=Eci2 PE=1 SV=2	Eci2	53630128	8	7.72941	1418	89.4073		HGYTFANL	SUMO-activating enzyme subunit 1 OS=Mus musculus OX=10090 GN=Sae1 PE=1 SV=1	Sae1	23375354	8	7.36876	459	73.2057
DAGAGIALNDN	Glyceraldehyde-3-phosphate dehydrogenase OS=Mus musculus OX=10090 GN=Gapdh PE=1 SV=2	Gapdh	53496260	11	7.72832	1417	89.3443		LAIRNDEEL	Histone H2A type 1-B OS=Mus musculus OX=10090 GN=H2ac4 PE=1 SV=1	H2ac4	23249774	9	7.36642	458	73.0463
NGPQNIYNL	Ribonuclease kappa OS=Mus musculus OX=10090 GN=Rnasek PE=3 SV=1	Rnasek	53099500	9	7.72509	1416	89.2812		SGKKLEDGPK	Elongation factor 1-alpha 1 OS=Mus musculus OX=10090 GN=Eef1a1 PE=1 SV=3	Eef1a1	23114526	10	7.36388	457	72.8868
VVDPFSKKDW	40S ribosomal protein S3a OS=Mus musculus OX=10090 GN=Rps3a PE=1 SV=3	Rps3a	53063168	10	7.72479	1415	89.2182		ALIQNADTL	SH3 domain-binding protein 1 OS=Mus musculus OX=10090 GN=Sh3bp1 PE=1 SV=3	Sh3bp1	22765660	9	7.35728	456	72.7273
STVRNADVI	ATP-dependent translocase ABCB1 OS=Mus musculus OX=10090 GN=Abcb1b PE=1 SV=1	Abcb1b	52981096	9	7.72412	1414	89.1551		TAVVNVTYM	Insulin-like growth factor 2 mRNA-binding protein 2 OS=Mus musculus OX=10090 GN=Igf2bp2 PE=1 SV=1	Igf2bp2	22517016	9	7.35251	455	72.5678
LEKPAKYDDIKK	Glyceraldehyde-3-phosphate dehydrogenase OS=Mus musculus OX=10090 GN=Gapdh PE=1 SV=2	Gapdh	52787654	12	7.72253	1413	89.0921		LAPKIEDEEAS	Proliferating cell nuclear antigen OS=Mus musculus OX=10090 GN=Pcna PE=1 SV=2	Pcna	22390810	11	7.35007	454	72.4083
GGVRNGVAL	Nucleolar protein 11 OS=Mus musculus OX=10090 GN=Nol11 PE=2 SV=1	Nol11	52768936	9	7.72238	1412	89.029		KLVFLGEQSV	Ras-related protein Rab-6A OS=Mus musculus OX=10090 GN=Rab6a PE=1 SV=4	Rab6a	22388664	10	7.35003	453	72.2488
IYDKDPEGTVQP	Cysteine-rich protein 2 OS=Mus musculus OX=10090 GN=Crip2 PE=1 SV=1	Crip2	52224580	12	7.71787	1411	88.966		AREIFDSRGNP	Alpha-enolase OS=Mus musculus OX=10090 GN=Eno1 PE=1 SV=3	Eno1	22364131	11	7.34955	452	72.0893
ASLLEEADY	Titin OS=Mus musculus OX=10090 GN=Ttn PE=1 SV=1	Ttn	52194492	9	7.71762	1410	88.9029		GSLKNVTTL	Erbin OS=Mus musculus OX=10090 GN=Erbin PE=1 SV=3	Erbin	22302052	9	7.34834	451	71.9298
SQYVFTEM	Transmembrane protein 199 OS=Mus musculus OX=10090 GN=Tmem199 PE=1 SV=1	Tmem199	52122924	8	7.71703	1409	88.8398		VGFDYKERL	Src substrate cortactin OS=Mus musculus OX=10090 GN=Cttn PE=1 SV=2	Cttn	22263862	9	7.3476	450	71.7703
SFSDYPPL	Elongation factor 1-alpha 1 OS=Mus musculus OX=10090 GN=Eef1a1 PE=1 SV=3	Eef1a1	52051172	8	7.71643	1408	88.7768		YIVEDTWAEV	Myosin-IIIa OS=Mus musculus OX=10090 GN=Myo3a PE=1 SV=1	Myo3a	21795543	10	7.33837	449	71.6108
GALKNLSVI	E3 ISG15--protein ligase Herc6 OS=Mus musculus OX=10090 GN=Herc6 PE=2 SV=1	Herc6	51960220	9	7.71567	1407	88.7137		AAPQNFTPSMI	AP-3 complex subunit beta-1 OS=Mus musculus OX=10090 GN=Ap3b1 PE=1 SV=2	Ap3b1	21679654	11	7.33605	448	71.4514
SLKGVDPKFL	60S ribosomal protein L29 OS=Mus musculus OX=10090 GN=Rpl29 PE=1 SV=2	Rpl29	51943932	10	7.71553	1406	88.6507		QVVQFNRL	Ragulator complex protein LAMTOR3 OS=Mus musculus OX=10090 GN=Lamtor3 PE=1 SV=1	Lamtor3	21677060	8	7.336	447	71.2919
RIYRMIKL	Heat shock protein HSP 90-alpha OS=Mus musculus OX=10090 GN=Hsp90aa1 PE=1 SV=4;Heat shock protein HSP 90-beta OS=Mus musculus OX=10090 GN=Hsp90ab1 PE=1 SV=3	Hsp90aa1	51744216	8	7.71386	1405	88.5876		ISGVNRYYV	NADH dehydrogenase [ubiquinone] 1 alpha subcomplex subunit 1 OS=Mus musculus OX=10090 GN=Ndufa1 PE=1 SV=1	Ndufa1	21534910	9	7.33314	446	71.1324
LISKIREEYPD	Tubulin beta-5 chain OS=Mus musculus OX=10090 GN=Tubb5 PE=1 SV=1;Tubulin beta-4B chain OS=Mus musculus OX=10090 GN=Tubb4b PE=1 SV=1;Tubulin beta-6 chain OS=Mus musculus OX=10090 GN=Tubb6 PE=1 SV=1	Tubb5	51352430	11	7.71056	1404	88.5246		AMAPRTLLL	H-2 class I histocompatibility antigen, D-D alpha chain OS=Mus musculus OX=10090 GN=H2-D1 PE=1 SV=1;H-2 class I histocompatibility antigen, D-B alpha chain OS=Mus musculus OX=10090 GN=H2-D1 PE=1 SV=2	H2-D1	21490044	9	7.33224	445	70.9729
VKVANVSLL	40S ribosomal protein S23 OS=Mus musculus OX=10090 GN=Rps23 PE=1 SV=3	Rps23	51166384	9	7.70898	1403	88.4615		ASPEFTKL	Protein FAM98A OS=Mus musculus OX=10090 GN=Fam98a PE=1 SV=1	Fam98a	21489670	8	7.33223	444	70.8134
QPHVNGGP	Abl interactor 1 OS=Mus musculus OX=10090 GN=Abi1 PE=1 SV=3	Abi1	51143912	8	7.70879	1402	88.3985		QASEGPLKGILG	Glyceraldehyde-3-phosphate dehydrogenase OS=Mus musculus OX=10090 GN=Gapdh PE=1 SV=2	Gapdh	21081698	12	7.32391	443	70.6539
TKKVGIVGKY	60S ribosomal protein L37a OS=Mus musculus OX=10090 GN=Rpl37a PE=1 SV=2	Rpl37a	50921980	10	7.70691	1401	88.3354		RIYGFTAV	E3 ubiquitin-protein ligase HECTD1 OS=Mus musculus OX=10090 GN=Hectd1 PE=1 SV=2	Hectd1	21019348	8	7.32262	442	70.4944
STRVTAEVTT	Uncharacterized protein C11orf24 homolog OS=Mus musculus OX=10090 PE=2 SV=1	?	50911724	10	7.70682	1400	88.2724		SAMVFSAM	V-type proton ATPase 16 kDa proteolipid subunit OS=Mus musculus OX=10090 GN=Atp6v0c PE=1 SV=1	Atp6v0c	21015724	8	7.32254	441	70.3349
SLEDPQTHS	Heat shock protein HSP 90-beta OS=Mus musculus OX=10090 GN=Hsp90ab1 PE=1 SV=3	Hsp90ab1	50911608	9	7.70682	1399	88.2093		HFISDGVKKTL	Complement C3 OS=Mus musculus OX=10090 GN=C3 PE=1 SV=3	C3	21004144	11	7.3223	440	70.1754
SGLKYVNV	Adenylate kinase isoenzyme 6 OS=Mus musculus OX=10090 GN=Ak6 PE=1 SV=1	Ak6	50558564	8	7.70379	1398	88.1463		VAYGFRNI	Cytosolic iron-sulfur assembly component 3 OS=Mus musculus OX=10090 GN=Ciao3 PE=1 SV=2	Ciao3	20753950	8	7.3171	439	70.0159
FMPGFAPL	Tubulin beta-3 chain OS=Mus musculus OX=10090 GN=Tubb3 PE=1 SV=1;Tubulin beta-5 chain OS=Mus musculus OX=10090 GN=Tubb5 PE=1 SV=1;Tubulin beta-4B chain OS=Mus musculus OX=10090 GN=Tubb4b PE=1 SV=1;Tubulin beta-6 chain OS=Mus musculus OX=10090 GN=Tubb6 PE=1 SV=1	Tubb3	49871684	8	7.69785	1397	88.0832		AQLAKKDYL	Neutrophil cytosol factor 2 OS=Mus musculus OX=10090 GN=Ncf2 PE=1 SV=1	Ncf2	20631936	9	7.31454	438	69.8565
KADGIVSKNF	40S ribosomal protein S21 OS=Mus musculus OX=10090 GN=Rps21 PE=1 SV=1	Rps21	4.94669e+07	10	7.69431	1396	88.0202		SIGDGIARVH	ATP synthase subunit alpha, mitochondrial OS=Mus musculus OX=10090 GN=Atp5f1a PE=1 SV=1	Atp5f1a	20613088	10	7.31414	437	69.697
RYDGMVGF	Heterogeneous nuclear ribonucleoprotein K OS=Mus musculus OX=10090 GN=Hnrnpk PE=1 SV=1	Hnrnpk	49428876	8	7.69398	1395	87.9571		TAYEFAKL	Estradiol 17-beta-dehydrogenase 11 OS=Mus musculus OX=10090 GN=Hsd17b11 PE=1 SV=1	Hsd17b11	20589418	8	7.31364	436	69.5375
FSHEGPAFL	5,6-dihydroxyindole-2-carboxylic acid oxidase OS=Mus musculus OX=10090 GN=Tyrp1 PE=1 SV=1	Tyrp1	49266532	9	7.69255	1394	87.8941		SFLPLSSSM	Vomeronasal type-1 receptor 52 OS=Mus musculus OX=10090 GN=Vmn1r52 PE=3 SV=1	Vmn1r52	20497142	9	7.31169	435	69.378
NRDITGELE	PITH domain-containing protein 1 OS=Mus musculus OX=10090 GN=Pithd1 PE=1 SV=1	Pithd1	49210772	9	7.69206	1393	87.831		IQLMNTAHL	Peroxisomal carnitine O-octanoyltransferase OS=Mus musculus OX=10090 GN=Crot PE=1 SV=1	Crot	20415352	9	7.30996	434	69.2185
TVDGPSGKLWR	Glyceraldehyde-3-phosphate dehydrogenase OS=Mus musculus OX=10090 GN=Gapdh PE=1 SV=2	Gapdh	49104734	11	7.69112	1392	87.768		YMPQNPHII	Histone-binding protein RBBP7 OS=Mus musculus OX=10090 GN=Rbbp7 PE=1 SV=1	Rbbp7	19919736	9	7.29928	433	69.059
SAVENILEHL	28S ribosomal protein S6, mitochondrial OS=Mus musculus OX=10090 GN=Mrps6 PE=1 SV=3	Mrps6	48818852	10	7.68859	1391	87.7049		ASVINGHTL	Serine/threonine-protein phosphatase 6 regulatory ankyrin repeat subunit B OS=Mus musculus OX=10090 GN=Ankrd44 PE=1 SV=1	Ankrd44	19827894	9	7.29728	432	68.8995
GVDARGIAKV	Protein kinase C epsilon type OS=Mus musculus OX=10090 GN=Prkce PE=1 SV=1	Prkce	48783028	10	7.68827	1390	87.6419		SALTNMVGSMF	Armadillo-like helical domain-containing protein 3 OS=Mus musculus OX=10090 GN=Armh3 PE=1 SV=2	Armh3	19806372	11	7.2968	431	68.74
FIDGHTKILT	Oogenesin-2 OS=Mus musculus OX=10090 GN=Oog2 PE=2 SV=1	Oog2	48718660	10	7.6877	1389	87.5788		HAIENIDTF	Breast cancer type 2 susceptibility protein homolog OS=Mus musculus OX=10090 GN=Brca2 PE=1 SV=2	Brca2	19794978	9	7.29656	430	68.5805
VGVNNPVFL	Lon protease homolog 2, peroxisomal OS=Mus musculus OX=10090 GN=Lonp2 PE=1 SV=1	Lonp2	48644164	9	7.68703	1388	87.5158		FHSGTPAASF	Ubiquitin-associated protein 2-like OS=Mus musculus OX=10090 GN=Ubap2l PE=1 SV=1	Ubap2l	19502362	10	7.29009	429	68.4211
SLEELRVAGIH	60S ribosomal protein L13 OS=Mus musculus OX=10090 GN=Rpl13 PE=1 SV=3	Rpl13	4.84228e+07	11	7.68505	1387	87.4527		SVVRYVQL	U6 snRNA-associated Sm-like protein LSm2 OS=Mus musculus OX=10090 GN=Lsm2 PE=1 SV=1	Lsm2	19500692	8	7.29005	428	68.2616
KAFTYINL	Transferrin receptor protein 1 OS=Mus musculus OX=10090 GN=Tfrc PE=1 SV=1	Tfrc	48128852	8	7.68241	1386	87.3897		SGRYELGSI	Solute carrier organic anion transporter family member 4C1 OS=Mus musculus OX=10090 GN=Slco4c1 PE=1 SV=1	Slco4c1	19475440	9	7.28949	427	68.1021
RSYDFEFM	Vacuolar protein sorting-associated protein 26A OS=Mus musculus OX=10090 GN=Vps26a PE=1 SV=1	Vps26a	47905624	8	7.68039	1385	87.3266		VVYIYHSL	Ribosomal oxygenase 2 OS=Mus musculus OX=10090 GN=Riox2 PE=1 SV=2	Riox2	19325156	8	7.28612	426	67.9426
FGLGAEQRPPAA	Activity-dependent neuroprotector homeobox protein OS=Mus musculus OX=10090 GN=Adnp PE=1 SV=2	Adnp	47686452	12	7.6784	1384	87.2636		AMNVNEIFM	Ras-related protein Rab-5C OS=Mus musculus OX=10090 GN=Rab5c PE=1 SV=2	Rab5c	19237185	9	7.28414	425	67.7831
FSETGAGKHVPR	Tubulin alpha-1A chain OS=Mus musculus OX=10090 GN=Tuba1a PE=1 SV=1;Tubulin alpha-1C chain OS=Mus musculus OX=10090 GN=Tuba1c PE=1 SV=1	Tuba1a	47361580	12	7.67543	1383	87.2005		FSGSNTLHL	Apolipoprotein B-100 OS=Mus musculus OX=10090 GN=Apob PE=1 SV=1	Apob	19176286	9	7.28276	424	67.6236
SQLVKADEM	DnaJ homolog subfamily C member 3 OS=Mus musculus OX=10090 GN=Dnajc3 PE=1 SV=1	Dnajc3	46926004	9	7.67141	1382	87.1375		ASGLTCTKAL	SCO-spondin OS=Mus musculus OX=10090 GN=Sspo PE=2 SV=2	Sspo	19112760	10	7.28132	423	67.4641
TNLIYQQV	Unconventional myosin-VIIa OS=Mus musculus OX=10090 GN=Myo7a PE=1 SV=2	Myo7a	46806944	8	7.67031	1381	87.0744		AALENTHLL	Cytosolic iron-sulfur assembly component 2B OS=Mus musculus OX=10090 GN=Ciao2b PE=1 SV=1	Ciao2b	19078178	9	7.28054	422	67.3046
ALFRQVTTP	Autophagy-related protein 2 homolog A OS=Mus musculus OX=10090 GN=Atg2a PE=1 SV=2	Atg2a	46570708	9	7.66811	1380	87.0113		SRPETGRP	40S ribosomal protein S10 OS=Mus musculus OX=10090 GN=Rps10 PE=1 SV=1	Rps10	18958408	8	7.2778	421	67.1451
SSFSRVTNF	TBC1 domain family member 17 OS=Mus musculus OX=10090 GN=Tbc1d17 PE=1 SV=2	Tbc1d17	46485340	9	7.66732	1379	86.9483		YNEATGGKYVPR	Tubulin beta-5 chain OS=Mus musculus OX=10090 GN=Tubb5 PE=1 SV=1;Tubulin beta-4B chain OS=Mus musculus OX=10090 GN=Tubb4b PE=1 SV=1	Tubb5	18956369	12	7.27776	420	66.9856
AAPIDRVGQTIE	Heterogeneous nuclear ribonucleoprotein M OS=Mus musculus OX=10090 GN=Hnrnpm PE=1 SV=3	Hnrnpm	46375376	12	7.66629	1378	86.8852		SSLAVADSDH	ATP-dependent RNA helicase DHX29 OS=Mus musculus OX=10090 GN=Dhx29 PE=1 SV=1	Dhx29	18956046	10	7.27775	419	66.8262
IREEYPDR	Tubulin beta-5 chain OS=Mus musculus OX=10090 GN=Tubb5 PE=1 SV=1;Tubulin beta-4B chain OS=Mus musculus OX=10090 GN=Tubb4b PE=1 SV=1;Tubulin beta-6 chain OS=Mus musculus OX=10090 GN=Tubb6 PE=1 SV=1	Tubb5	46278244	8	7.66538	1377	86.8222		AKLVNQEVL	NADH-ubiquinone oxidoreductase 75 kDa subunit, mitochondrial OS=Mus musculus OX=10090 GN=Ndufs1 PE=1 SV=2	Ndufs1	18910494	9	7.2767	418	66.6667
LAIRNDEEL	Histone H2AX OS=Mus musculus OX=10090 GN=H2ax PE=1 SV=2	H2ax	45900092	9	7.66181	1376	86.7591		TNQDFIQRL	Nischarin OS=Mus musculus OX=10090 GN=Nisch PE=1 SV=2	Nisch	18619738	9	7.26997	417	66.5072
TKGGPDFSNLEK	NudC domain-containing protein 2 OS=Mus musculus OX=10090 GN=Nudcd2 PE=1 SV=1	Nudcd2	4.51553e+07	12	7.65471	1375	86.6961		GALKNLSVI	E3 ISG15--protein ligase Herc6 OS=Mus musculus OX=10090 GN=Herc6 PE=2 SV=1	Herc6	18574258	9	7.26891	416	66.3477
KVIPELNGKLTG	Glyceraldehyde-3-phosphate dehydrogenase OS=Mus musculus OX=10090 GN=Gapdh PE=1 SV=2	Gapdh	45072377	12	7.65391	1374	86.633		KVIPELNGKLTG	Glyceraldehyde-3-phosphate dehydrogenase OS=Mus musculus OX=10090 GN=Gapdh PE=1 SV=2	Gapdh	18515935	12	7.26755	415	66.1882
DHPIVETLR	Heat shock protein HSP 90-beta OS=Mus musculus OX=10090 GN=Hsp90ab1 PE=1 SV=3	Hsp90ab1	4.50439e+07	9	7.65364	1373	86.57		SSIQNGKYTL	Lysine-specific demethylase 7A OS=Mus musculus OX=10090 GN=Kdm7a PE=2 SV=2	Kdm7a	18515074	10	7.26753	414	66.0287
SSVPGVRLLQ	Vimentin OS=Mus musculus OX=10090 GN=Vim PE=1 SV=3	Vim	44896996	10	7.65222	1372	86.5069		TVAVGVIK	Elongation factor 1-alpha 1 OS=Mus musculus OX=10090 GN=Eef1a1 PE=1 SV=3	Eef1a1	18351190	8	7.26366	413	65.8692
SLGSALRPSTS	Vimentin OS=Mus musculus OX=10090 GN=Vim PE=1 SV=3	Vim	44796536	11	7.65124	1371	86.4439		SQVINPTAI	Host cell factor 1 OS=Mus musculus OX=10090 GN=Hcfc1 PE=1 SV=2	Hcfc1	18144238	9	7.25874	412	65.7097
KVGINYQPP	Tubulin alpha-8 chain OS=Mus musculus OX=10090 GN=Tuba8 PE=1 SV=1;Tubulin alpha chain-like 3 OS=Mus musculus OX=10090 GN=Tubal3 PE=2 SV=2;Tubulin alpha-1A chain OS=Mus musculus OX=10090 GN=Tuba1a PE=1 SV=1;Tubulin alpha-1C chain OS=Mus musculus OX=10090 GN=Tuba1c PE=1 SV=1	Tuba8	44395692	9	7.64734	1370	86.3808		SLKGVDPKFL	60S ribosomal protein L29 OS=Mus musculus OX=10090 GN=Rpl29 PE=1 SV=2	Rpl29	18132874	10	7.25847	411	65.5502
FSGSNTLHL	Apolipoprotein B-100 OS=Mus musculus OX=10090 GN=Apob PE=1 SV=1	Apob	44229900	9	7.64572	1369	86.3178		AAGAGKVTK	Elongation factor 1-alpha 1 OS=Mus musculus OX=10090 GN=Eef1a1 PE=1 SV=3	Eef1a1	18107096	9	7.25785	410	65.3907
VGAAKHGVSRT	Chromodomain-helicase-DNA-binding protein 7 OS=Mus musculus OX=10090 GN=Chd7 PE=1 SV=1	Chd7	43638964	11	7.63987	1368	86.2547		KAFTYINL	Transferrin receptor protein 1 OS=Mus musculus OX=10090 GN=Tfrc PE=1 SV=1	Tfrc	18069664	8	7.25695	409	65.2313
LEGLEGSSAAEI	Pleckstrin homology domain-containing family G member 2 OS=Mus musculus OX=10090 GN=Plekhg2 PE=2 SV=2	Plekhg2	43399508	12	7.63748	1367	86.1917		IAMEFNHL	Prostaglandin G/H synthase 1 OS=Mus musculus OX=10090 GN=Ptgs1 PE=1 SV=1	Ptgs1	1.80685e+07	8	7.25692	408	65.0718
SDYPPLGR	Elongation factor 1-alpha 1 OS=Mus musculus OX=10090 GN=Eef1a1 PE=1 SV=3	Eef1a1	43236688	8	7.63585	1366	86.1286		LQYEFTKL	Formin-like protein 2 OS=Mus musculus OX=10090 GN=Fmnl2 PE=1 SV=2	Fmnl2	17947022	8	7.25399	407	64.9123
RSIKNVTEL	Replication termination factor 2 OS=Mus musculus OX=10090 GN=Rtf2 PE=1 SV=1	Rtf2	43232215	9	7.63581	1365	86.0656		TISSTGPNGAII	Xaa-Pro aminopeptidase 1 OS=Mus musculus OX=10090 GN=Xpnpep1 PE=1 SV=1	Xpnpep1	17716962	12	7.24839	406	64.7528
SALQNAESDRL	Centromere-associated protein E OS=Mus musculus OX=10090 GN=Cenpe PE=1 SV=1	Cenpe	43152736	11	7.63501	1364	86.0025		GLQFPVGRIH	Histone H2A.Z OS=Mus musculus OX=10090 GN=H2az1 PE=1 SV=2	H2az1	17635156	10	7.24638	405	64.5933
KRLTKGGKKGA	40S ribosomal protein S3a OS=Mus musculus OX=10090 GN=Rps3a PE=1 SV=3	Rps3a	43075580	11	7.63423	1363	85.9395		ISFKFDHL	F-actin-capping protein subunit alpha-1 OS=Mus musculus OX=10090 GN=Capza1 PE=1 SV=4	Capza1	17616276	8	7.24591	404	64.4338
SNYGPMKGGSF	Heterogeneous nuclear ribonucleoprotein A3 OS=Mus musculus OX=10090 GN=Hnrnpa3 PE=1 SV=1	Hnrnpa3	42904684	11	7.6325	1362	85.8764		QTVENVEHL	TELO2-interacting protein 1 homolog OS=Mus musculus OX=10090 GN=Tti1 PE=1 SV=2	Tti1	17573404	9	7.24486	403	64.2743
IGIVKQAGLDR	Heterogeneous nuclear ribonucleoprotein F OS=Mus musculus OX=10090 GN=Hnrnpf PE=1 SV=3	Hnrnpf	4.2765e+07	11	7.63109	1361	85.8134		RSLKFYSL	Pre-mRNA-processing factor 19 OS=Mus musculus OX=10090 GN=Prpf19 PE=1 SV=1	Prpf19	17277914	8	7.23749	402	64.1148
KTVVNKDVF	60S ribosomal protein L27 OS=Mus musculus OX=10090 GN=Rpl27 PE=1 SV=2	Rpl27	42568784	9	7.62909	1360	85.7503		REEYPDRIM	Tubulin beta-5 chain OS=Mus musculus OX=10090 GN=Tubb5 PE=1 SV=1;Tubulin beta-4B chain OS=Mus musculus OX=10090 GN=Tubb4b PE=1 SV=1	Tubb5	1.7175e+07	9	7.2349	401	63.9553
IRMLGDVR	High affinity cAMP-specific 3',5'-cyclic phosphodiesterase 7A OS=Mus musculus OX=10090 GN=Pde7a PE=2 SV=2	Pde7a	42301964	8	7.62636	1359	85.6873		GALKNTDYF	Cytosolic 5'-nucleotidase 3A OS=Mus musculus OX=10090 GN=Nt5c3a PE=1 SV=4	Nt5c3a	17165138	9	7.23465	400	63.7959
SGKKLEDGPK	Elongation factor 1-alpha 1 OS=Mus musculus OX=10090 GN=Eef1a1 PE=1 SV=3	Eef1a1	42268860	10	7.62602	1358	85.6242		QPHVNGGP	Abl interactor 1 OS=Mus musculus OX=10090 GN=Abi1 PE=1 SV=3	Abi1	17060814	8	7.232	399	63.6364
EHKTSFSI	Zinc finger and BTB domain-containing protein 5 OS=Mus musculus OX=10090 GN=Zbtb5 PE=2 SV=1	Zbtb5	42218924	8	7.62551	1357	85.5612		KGVFNVEVV	Dedicator of cytokinesis protein 7 OS=Mus musculus OX=10090 GN=Dock7 PE=1 SV=3	Dock7	16841700	9	7.22639	398	63.4769
RLEKPAKY	Glyceraldehyde-3-phosphate dehydrogenase OS=Mus musculus OX=10090 GN=Gapdh PE=1 SV=2	Gapdh	42052064	8	7.62379	1356	85.4981		KEYMVTIR	Docking protein 2 OS=Mus musculus OX=10090 GN=Dok2 PE=1 SV=1	Dok2	16841186	8	7.22637	397	63.3174
ASPEFTKL	Protein FAM98A OS=Mus musculus OX=10090 GN=Fam98a PE=1 SV=1	Fam98a	41578388	8	7.61887	1355	85.4351		STVRNADVI	ATP-dependent translocase ABCB1 OS=Mus musculus OX=10090 GN=Abcb1b PE=1 SV=1	Abcb1b	16828136	9	7.22604	396	63.1579
EALELRDNDKTR	Alpha-enolase OS=Mus musculus OX=10090 GN=Eno1 PE=1 SV=3	Eno1	4.10594e+07	12	7.61341	1354	85.372		ATRSFPQL	Annexin A7 OS=Mus musculus OX=10090 GN=Anxa7 PE=1 SV=2	Anxa7	16690782	8	7.22248	395	62.9984
VGIRNTFLL	Poly(A) RNA polymerase GLD2 OS=Mus musculus OX=10090 GN=Tent2 PE=1 SV=1	Tent2	41056856	9	7.61339	1353	85.309		SSVPGVRLLQ	Vimentin OS=Mus musculus OX=10090 GN=Vim PE=1 SV=3	Vim	16645209	10	7.22129	394	62.8389
KSLLNSKDIM	Thiosulfate sulfurtransferase/rhodanese-like domain-containing protein 3 OS=Mus musculus OX=10090 GN=Tstd3 PE=1 SV=1	Tstd3	40820656	10	7.61088	1352	85.2459		LQYEFTHL	Formin-like protein 1 OS=Mus musculus OX=10090 GN=Fmnl1 PE=1 SV=1	Fmnl1	16595147	8	7.21998	393	62.6794
QIIPFKTL	Ribosomal L1 domain-containing protein 1 OS=Mus musculus OX=10090 GN=Rsl1d1 PE=1 SV=1	Rsl1d1	40650880	8	7.60907	1351	85.1828		SVVAFHNL	Probable C-mannosyltransferase DPY19L3 OS=Mus musculus OX=10090 GN=Dpy19l3 PE=2 SV=2	Dpy19l3	16240385	8	7.2106	392	62.5199
MGEVGLSWNFGP	Kinesin-like protein KIF7 OS=Mus musculus OX=10090 GN=Kif7 PE=1 SV=1	Kif7	40418816	12	7.60658	1350	85.1198		SLGSALRPSTS	Vimentin OS=Mus musculus OX=10090 GN=Vim PE=1 SV=3	Vim	16136234	11	7.2078	391	62.3604
FSPTNPAHLL	WD repeat-containing protein 76 OS=Mus musculus OX=10090 GN=Wdr76 PE=1 SV=1	Wdr76	40412892	10	7.60652	1349	85.0567		VRAVRPKVLM	60S ribosomal protein L34 OS=Mus musculus OX=10090 GN=Rpl34 PE=1 SV=2	Rpl34	16060413	10	7.20576	390	62.201
AKLVNQEVL	NADH-ubiquinone oxidoreductase 75 kDa subunit, mitochondrial OS=Mus musculus OX=10090 GN=Ndufs1 PE=1 SV=2	Ndufs1	40208480	9	7.60432	1348	84.9937		NEATGGKYVPR	Tubulin beta-5 chain OS=Mus musculus OX=10090 GN=Tubb5 PE=1 SV=1;Tubulin beta-4B chain OS=Mus musculus OX=10090 GN=Tubb4b PE=1 SV=1	Tubb5	16037549	11	7.20514	389	62.0415
RKGQVIQF	60S ribosomal protein L36a OS=Mus musculus OX=10090 GN=Rpl36a PE=3 SV=2	Rpl36a	40178016	8	7.60399	1347	84.9306		GVDARGIAKV	Protein kinase C epsilon type OS=Mus musculus OX=10090 GN=Prkce PE=1 SV=1	Prkce	16013325	10	7.20448	388	61.882
ISGVNGTHI	SRSF protein kinase 1 OS=Mus musculus OX=10090 GN=Srpk1 PE=1 SV=2	Srpk1	39622420	9	7.59794	1346	84.8676		VNFVHTNL	60S ribosomal protein L4 OS=Mus musculus OX=10090 GN=Rpl4 PE=1 SV=3	Rpl4	16003689	8	7.20422	387	61.7225
SALANYIHL	Integral membrane protein GPR180 OS=Mus musculus OX=10090 GN=Gpr180 PE=1 SV=1	Gpr180	39318004	9	7.59459	1345	84.8045		KSYSFIARM	Calcium homeostasis endoplasmic reticulum protein OS=Mus musculus OX=10090 GN=Cherp PE=1 SV=1	Cherp	15967317	9	7.20323	386	61.563
SSLSNPIANTM	F-box only protein 33 OS=Mus musculus OX=10090 GN=Fbxo33 PE=1 SV=3	Fbxo33	39289820	11	7.59428	1344	84.7415		VGLINKDSV	Histone-lysine N-methyltransferase ASH1L OS=Mus musculus OX=10090 GN=Ash1l PE=1 SV=3	Ash1l	15913891	9	7.20178	385	61.4035
RIYGFTAV	E3 ubiquitin-protein ligase HECTD1 OS=Mus musculus OX=10090 GN=Hectd1 PE=1 SV=2	Hectd1	39185212	8	7.59312	1343	84.6784		KADGIVSKNF	40S ribosomal protein S21 OS=Mus musculus OX=10090 GN=Rps21 PE=1 SV=1	Rps21	15799493	10	7.19864	384	61.244
GPMKSGNFGGS	Heterogeneous nuclear ribonucleoproteins A2/B1 OS=Mus musculus OX=10090 GN=Hnrnpa2b1 PE=1 SV=2	Hnrnpa2b1	38802256	11	7.58886	1342	84.6154		DAGAGIALNDNF	Glyceraldehyde-3-phosphate dehydrogenase OS=Mus musculus OX=10090 GN=Gapdh PE=1 SV=2	Gapdh	15688451	12	7.19558	383	61.0845
VGLINKDSV	Histone-lysine N-methyltransferase ASH1L OS=Mus musculus OX=10090 GN=Ash1l PE=1 SV=3	Ash1l	38656516	9	7.58722	1341	84.5523		SGYDFENRL	Tetratricopeptide repeat protein 39C OS=Mus musculus OX=10090 GN=Ttc39c PE=1 SV=2	Ttc39c	15660878	9	7.19482	382	60.925
TNQDFIQRL	Nischarin OS=Mus musculus OX=10090 GN=Nisch PE=1 SV=2	Nisch	38618464	9	7.58679	1340	84.4893		VSFTYRYL	Vacuolar protein sorting-associated protein 16 homolog OS=Mus musculus OX=10090 GN=Vps16 PE=1 SV=3	Vps16	15656665	8	7.1947	381	60.7656
SSWTFPVT	Mitogen-activated protein kinase kinase kinase 6 OS=Mus musculus OX=10090 GN=Map3k6 PE=1 SV=4	Map3k6	38594688	8	7.58653	1339	84.4262		AVLSFSTRL	Dolichyl-diphosphooligosaccharide--protein glycosyltransferase subunit STT3A OS=Mus musculus OX=10090 GN=Stt3a PE=1 SV=1	Stt3a	15568570	9	7.19225	380	60.6061
AAGVGDMVM	60S ribosomal protein L23 OS=Mus musculus OX=10090 GN=Rpl23 PE=1 SV=1	Rpl23	38554164	9	7.58607	1338	84.3632		ASIVNKDGL	Peroxisome proliferator-activated receptor delta OS=Mus musculus OX=10090 GN=Ppard PE=1 SV=1	Ppard	15566872	9	7.1922	379	60.4466
KSLKNFITI	Cysteine--tRNA ligase, cytoplasmic OS=Mus musculus OX=10090 GN=Cars1 PE=1 SV=2	Cars1	38437904	9	7.58476	1337	84.3001		FSHEGPAFL	5,6-dihydroxyindole-2-carboxylic acid oxidase OS=Mus musculus OX=10090 GN=Tyrp1 PE=1 SV=1	Tyrp1	15521382	9	7.19093	378	60.2871
KLPKQPVIVK	60S ribosomal protein L27a OS=Mus musculus OX=10090 GN=Rpl27a PE=1 SV=5	Rpl27a	38388204	10	7.5842	1336	84.2371		KVGINYQPP	Tubulin alpha-1B chain OS=Mus musculus OX=10090 GN=Tuba1b PE=1 SV=2	Tuba1b	15500814	9	7.19035	377	60.1276
SFNKEEVLK	T-cell-specific guanine nucleotide triphosphate-binding protein 1 OS=Mus musculus OX=10090 GN=Tgtp1 PE=1 SV=1	Tgtp1	38289776	9	7.58308	1335	84.174		VSSINQEAL	Chromatin accessibility complex protein 1 OS=Mus musculus OX=10090 GN=Chrac1 PE=1 SV=1	Chrac1	15447939	9	7.18887	376	59.9681
FAIDDHDYL	Phosphatidylinositol 5-phosphate 4-kinase type-2 gamma OS=Mus musculus OX=10090 GN=Pip4k2c PE=1 SV=1	Pip4k2c	38283264	9	7.58301	1334	84.111		AGLTHIITM	Phosphoribosyl pyrophosphate synthase-associated protein 1 OS=Mus musculus OX=10090 GN=Prpsap1 PE=1 SV=1	Prpsap1	15445670	9	7.18881	375	59.8086
AAPRSFIFL	N6-adenosine-methyltransferase non-catalytic subunit OS=Mus musculus OX=10090 GN=Mettl14 PE=1 SV=1	Mettl14	38096480	9	7.58088	1333	84.0479		SILVNQEVL	Signal transducer and activator of transcription 4 OS=Mus musculus OX=10090 GN=Stat4 PE=1 SV=1	Stat4	15370321	9	7.18668	374	59.6491
RIEEELGSKAKF	Alpha-enolase OS=Mus musculus OX=10090 GN=Eno1 PE=1 SV=3	Eno1	38050768	12	7.58036	1332	83.9849		TNLIYQQV	Unconventional myosin-VIIa OS=Mus musculus OX=10090 GN=Myo7a PE=1 SV=2	Myo7a	15135322	8	7.17999	373	59.4896
KEYMVTIR	Docking protein 2 OS=Mus musculus OX=10090 GN=Dok2 PE=1 SV=1	Dok2	37807940	8	7.57758	1331	83.9218		VSSLITTDM	DNA cross-link repair 1A protein OS=Mus musculus OX=10090 GN=Dclre1a PE=1 SV=2	Dclre1a	15087649	9	7.17862	372	59.3301
ILGTNTIMDK	Heterogeneous nuclear ribonucleoprotein U OS=Mus musculus OX=10090 GN=Hnrnpu PE=1 SV=1	Hnrnpu	37723948	10	7.57662	1330	83.8588		SSVQNGIML	E3 ubiquitin-protein ligase Praja-2 OS=Mus musculus OX=10090 GN=Pja2 PE=1 SV=2	Pja2	15084952	9	7.17854	371	59.1707
AAGAGKVTK	Elongation factor 1-alpha 1 OS=Mus musculus OX=10090 GN=Eef1a1 PE=1 SV=3	Eef1a1	37622588	9	7.57545	1329	83.7957		KRHMITHSEK	PR domain zinc finger protein 5 OS=Mus musculus OX=10090 GN=Prdm5 PE=2 SV=2	Prdm5	15043334	10	7.17734	370	59.0112
SLADAINTEF	Vimentin OS=Mus musculus OX=10090 GN=Vim PE=1 SV=3	Vim	37621328	10	7.57543	1328	83.7327		NQVANPNSAIF	Eukaryotic translation initiation factor 4H OS=Mus musculus OX=10090 GN=Eif4h PE=1 SV=3	Eif4h	15000121	11	7.17609	369	58.8517
YESLKGVDPKFL	60S ribosomal protein L29 OS=Mus musculus OX=10090 GN=Rpl29 PE=1 SV=2	Rpl29	37549552	12	7.5746	1327	83.6696		SNPDIASETL	Rho guanine nucleotide exchange factor 17 OS=Mus musculus OX=10090 GN=Arhgef17 PE=1 SV=2	Arhgef17	14914037	10	7.1736	368	58.6922
SVYVYKVL	Histone H2B type 1-B OS=Mus musculus OX=10090 GN=H2bc3 PE=1 SV=3;Histone H2B type 1-F/J/L OS=Mus musculus OX=10090 GN=H2bc7 PE=1 SV=2	H2bc3	37525020	8	7.57432	1326	83.6066		FGLGAEQRPPAA	Activity-dependent neuroprotector homeobox protein OS=Mus musculus OX=10090 GN=Adnp PE=1 SV=2	Adnp	14910614	12	7.1735	367	58.5327
WEKADINTKW	60S ribosomal protein L14 OS=Mus musculus OX=10090 GN=Rpl14 PE=1 SV=3	Rpl14	37362344	10	7.57243	1325	83.5435		ARIIFNQV	Bcl-2-related protein A1 OS=Mus musculus OX=10090 GN=Bcl2a1 PE=1 SV=1	Bcl2a1	14886141	8	7.17278	366	58.3732
FLQSLGETA	Collagen alpha-4(VI) chain OS=Mus musculus OX=10090 GN=Col6a4 PE=1 SV=2	Col6a4	37292420	9	7.57162	1324	83.4805		TKAPKIQRLVTP	40S ribosomal protein S6 OS=Mus musculus OX=10090 GN=Rps6 PE=1 SV=1	Rps6	14834192	12	7.17126	365	58.2137
IQLMNTAHL	Peroxisomal carnitine O-octanoyltransferase OS=Mus musculus OX=10090 GN=Crot PE=1 SV=1	Crot	37258711	9	7.57123	1323	83.4174		AVTVAPPGAR	Heterogeneous nuclear ribonucleoprotein U OS=Mus musculus OX=10090 GN=Hnrnpu PE=1 SV=1	Hnrnpu	14815074	10	7.1707	364	58.0542
GKKLEDGPKFL	Elongation factor 1-alpha 1 OS=Mus musculus OX=10090 GN=Eef1a1 PE=1 SV=3	Eef1a1	37214012	11	7.57071	1322	83.3544		KLIEVDDERKLR	40S ribosomal protein S6 OS=Mus musculus OX=10090 GN=Rps6 PE=1 SV=1	Rps6	14789055	12	7.16994	363	57.8947
RTLIYITL	Actin-related protein 2/3 complex subunit 3 OS=Mus musculus OX=10090 GN=Arpc3 PE=1 SV=3	Arpc3	37112612	8	7.56952	1321	83.2913		NITRMPNHL	Secreted frizzled-related sequence protein 4 OS=Mus musculus OX=10090 GN=Sfrp4 PE=2 SV=1	Sfrp4	14674453	9	7.16656	362	57.7352
LIYKFLNV	Exportin-1 OS=Mus musculus OX=10090 GN=Xpo1 PE=1 SV=1	Xpo1	37055136	8	7.56885	1320	83.2282		VAVVNKVDI	NPC intracellular cholesterol transporter 1 OS=Mus musculus OX=10090 GN=Npc1 PE=1 SV=2	Npc1	14630529	9	7.16526	361	57.5758
REEYPDRIM	Tubulin beta-3 chain OS=Mus musculus OX=10090 GN=Tubb3 PE=1 SV=1;Tubulin beta-5 chain OS=Mus musculus OX=10090 GN=Tubb5 PE=1 SV=1;Tubulin beta-4B chain OS=Mus musculus OX=10090 GN=Tubb4b PE=1 SV=1;Tubulin beta-6 chain OS=Mus musculus OX=10090 GN=Tubb6 PE=1 SV=1	Tubb3	36667334	9	7.56428	1319	83.1652		SLPLVDTHSK	Vimentin OS=Mus musculus OX=10090 GN=Vim PE=1 SV=3	Vim	14469456	10	7.16045	360	57.4163
SSPGGAYVTR	Vimentin OS=Mus musculus OX=10090 GN=Vim PE=1 SV=3	Vim	36553900	10	7.56293	1318	83.1021		RLEKPAKY	Glyceraldehyde-3-phosphate dehydrogenase OS=Mus musculus OX=10090 GN=Gapdh PE=1 SV=2	Gapdh	14424642	8	7.15911	359	57.2568
IAVANAQEL	Mitochondrial import inner membrane translocase subunit Tim13 OS=Mus musculus OX=10090 GN=Timm13 PE=1 SV=1	Timm13	36440760	9	7.56159	1317	83.0391		YGIRNSLLI	Ribonucleoside-diphosphate reductase large subunit OS=Mus musculus OX=10090 GN=Rrm1 PE=1 SV=2	Rrm1	14421124	9	7.159	358	57.0973
SETGAGKHVP	Tubulin alpha-1A chain OS=Mus musculus OX=10090 GN=Tuba1a PE=1 SV=1;Tubulin alpha-1C chain OS=Mus musculus OX=10090 GN=Tuba1c PE=1 SV=1	Tuba1a	36435404	10	7.56152	1316	82.976		WISKQEYDESGP	Actin, cytoplasmic 1 OS=Mus musculus OX=10090 GN=Actb PE=1 SV=1	Actb	14346719	12	7.15675	357	56.9378
FVIRNIVEA	40S ribosomal protein S26 OS=Mus musculus OX=10090 GN=Rps26 PE=1 SV=3	Rps26	36265776	9	7.5595	1315	82.913		FSETGAGKHVPR	Tubulin alpha-1B chain OS=Mus musculus OX=10090 GN=Tuba1b PE=1 SV=2	Tuba1b	14302359	12	7.15541	356	56.7783
NGKLTGMAF	Glyceraldehyde-3-phosphate dehydrogenase OS=Mus musculus OX=10090 GN=Gapdh PE=1 SV=2	Gapdh	36065044	9	7.55709	1314	82.8499		IAVANAQEL	Mitochondrial import inner membrane translocase subunit Tim13 OS=Mus musculus OX=10090 GN=Timm13 PE=1 SV=1	Timm13	14224565	9	7.15304	355	56.6188
YVHVNRDTL	Bifunctional polynucleotide phosphatase/kinase OS=Mus musculus OX=10090 GN=Pnkp PE=1 SV=2	Pnkp	35986116	9	7.55613	1313	82.7869		TKKVGIVGKY	60S ribosomal protein L37a OS=Mus musculus OX=10090 GN=Rpl37a PE=1 SV=2	Rpl37a	14223363	10	7.153	354	56.4593
RYRAGAKKLAP	Inner nuclear membrane protein Man1 OS=Mus musculus OX=10090 GN=Lemd3 PE=1 SV=2	Lemd3	35587056	11	7.55129	1312	82.7238		AALLVNYIT	Synaptic vesicle membrane protein VAT-1 homolog OS=Mus musculus OX=10090 GN=Vat1 PE=1 SV=3	Vat1	14163506	9	7.15117	353	56.2998
KGVFNVEVV	Dedicator of cytokinesis protein 7 OS=Mus musculus OX=10090 GN=Dock7 PE=1 SV=3	Dock7	35585376	9	7.55127	1311	82.6608		EAVVISGRKLA	Bifunctional methylenetetrahydrofolate dehydrogenase/cyclohydrolase, mitochondrial OS=Mus musculus OX=10090 GN=Mthfd2 PE=1 SV=1	Mthfd2	14129140	11	7.15012	352	56.1404
SQVLANGLDNK	40S ribosomal protein S18 OS=Mus musculus OX=10090 GN=Rps18 PE=1 SV=3	Rps18	35440304	11	7.5495	1310	82.5977		IQAENAEFM	Heme oxygenase 1 OS=Mus musculus OX=10090 GN=Hmox1 PE=1 SV=1	Hmox1	14017600	9	7.14667	351	55.9809
YFDDLDNQIKKM	Cyclin-dependent kinase 1 OS=Mus musculus OX=10090 GN=Cdk1 PE=1 SV=3	Cdk1	35429100	12	7.54936	1309	82.5347		KSIVNQVFL	E3 ubiquitin-protein ligase RNFT1 OS=Mus musculus OX=10090 GN=Rnft1 PE=2 SV=1	Rnft1	13925733	9	7.14382	350	55.8214
LQQQLEQL	Max dimerization protein 3 OS=Mus musculus OX=10090 GN=Mxd3 PE=1 SV=1	Mxd3	35233416	8	7.54695	1308	82.4716		SSLSNPIANTM	F-box only protein 33 OS=Mus musculus OX=10090 GN=Fbxo33 PE=1 SV=3	Fbxo33	13872983	11	7.14217	349	55.6619
KLTSDDVKEQIY	40S ribosomal protein S13 OS=Mus musculus OX=10090 GN=Rps13 PE=1 SV=2	Rps13	35144044	12	7.54585	1307	82.4086		ANLSNLQRL	Leucine-rich repeat and transmembrane domain-containing protein 2 OS=Mus musculus OX=10090 GN=Lrtm2 PE=2 SV=1	Lrtm2	13846123	9	7.14133	348	55.5024
TVIDEVRTGTY	Tubulin alpha-1A chain OS=Mus musculus OX=10090 GN=Tuba1a PE=1 SV=1;Tubulin alpha-1C chain OS=Mus musculus OX=10090 GN=Tuba1c PE=1 SV=1	Tuba1a	35140444	11	7.54581	1306	82.3455		TLLIKTVETR	Vimentin OS=Mus musculus OX=10090 GN=Vim PE=1 SV=3	Vim	13816934	10	7.14041	347	55.3429
ESLKGVDPKFL	60S ribosomal protein L29 OS=Mus musculus OX=10090 GN=Rpl29 PE=1 SV=2	Rpl29	35062720	11	7.54485	1305	82.2825		SLSTSSMHGG	Protein TALPID3 OS=Mus musculus OX=10090 GN=Talpid3 PE=1 SV=1	Talpid3	13737330	10	7.1379	346	55.1834
IEYMAPEII	Ribosomal protein S6 kinase alpha-4 OS=Mus musculus OX=10090 GN=Rps6ka4 PE=1 SV=2	Rps6ka4	35050732	9	7.5447	1304	82.2194		NAGVEGSLIVEK	60 kDa heat shock protein, mitochondrial OS=Mus musculus OX=10090 GN=Hspd1 PE=1 SV=1	Hspd1	13731429	12	7.13772	345	55.0239
HSILEVNVCP	Vacuolar protein sorting-associated protein 13A OS=Mus musculus OX=10090 GN=Vps13a PE=1 SV=1	Vps13a	34937972	10	7.5433	1303	82.1564		DVQLQESG	Ig heavy chain V region MOPC 315 OS=Mus musculus OX=10090 PE=1 SV=2	?	13710128	8	7.13704	344	54.8644
SLEVSSLNIL	E3 ISG15--protein ligase Herc6 OS=Mus musculus OX=10090 GN=Herc6 PE=2 SV=1	Herc6	34903624	10	7.54287	1302	82.0933		LEKPAKYDDIKK	Glyceraldehyde-3-phosphate dehydrogenase OS=Mus musculus OX=10090 GN=Gapdh PE=1 SV=2	Gapdh	13668590	12	7.13572	343	54.7049
AGLTHIITM	Phosphoribosyl pyrophosphate synthase-associated protein 1 OS=Mus musculus OX=10090 GN=Prpsap1 PE=1 SV=1;Phosphoribosyl pyrophosphate synthase-associated protein 2 OS=Mus musculus OX=10090 GN=Prpsap2 PE=1 SV=1	Prpsap1	34828524	9	7.54194	1301	82.0303		IVVSHILED	ATP-binding cassette sub-family A member 13 OS=Mus musculus OX=10090 GN=Abca13 PE=2 SV=1	Abca13	13594944	9	7.13338	342	54.5455
SLVRKIVER	Trifunctional purine biosynthetic protein adenosine-3 OS=Mus musculus OX=10090 GN=Gart PE=1 SV=3	Gart	34687724	9	7.54018	1300	81.9672		SGTLMMAF	IQ motif and SEC7 domain-containing protein 3 OS=Mus musculus OX=10090 GN=Iqsec3 PE=1 SV=1	Iqsec3	13525619	8	7.13116	341	54.386
IVGINLTEM	ELMO domain-containing protein 2 OS=Mus musculus OX=10090 GN=Elmod2 PE=1 SV=1	Elmod2	34400840	9	7.53657	1299	81.9042		SALQNAESDRL	Centromere-associated protein E OS=Mus musculus OX=10090 GN=Cenpe PE=1 SV=1	Cenpe	13424985	11	7.12791	340	54.2265
ASIVNKDGL	Peroxisome proliferator-activated receptor delta OS=Mus musculus OX=10090 GN=Ppard PE=1 SV=1	Ppard	34385144	9	7.53637	1298	81.8411		PKFEVIDKPQS	ATP synthase-coupling factor 6, mitochondrial OS=Mus musculus OX=10090 GN=Atp5pf PE=1 SV=1	Atp5pf	13412805	11	7.12752	339	54.067
GWTANMERIMKA	Heat shock protein HSP 90-alpha OS=Mus musculus OX=10090 GN=Hsp90aa1 PE=1 SV=4;Heat shock protein HSP 90-beta OS=Mus musculus OX=10090 GN=Hsp90ab1 PE=1 SV=3	Hsp90aa1	34333800	12	7.53572	1297	81.7781		FLSSTMQTL	Canalicular multispecific organic anion transporter 2 OS=Mus musculus OX=10090 GN=Abcc3 PE=1 SV=1	Abcc3	13276263	9	7.12308	338	53.9075
SQIVSSITASL	Tubulin alpha-8 chain OS=Mus musculus OX=10090 GN=Tuba8 PE=1 SV=1;Tubulin alpha-1C chain OS=Mus musculus OX=10090 GN=Tuba1c PE=1 SV=1	Tuba8	34316924	11	7.53551	1296	81.715		ALPMTALR	Leucine-rich repeat transmembrane protein FLRT3 OS=Mus musculus OX=10090 GN=Flrt3 PE=1 SV=1	Flrt3	13124201	8	7.11807	337	53.748
LFHPEQLITG	Tubulin alpha-8 chain OS=Mus musculus OX=10090 GN=Tuba8 PE=1 SV=1;Tubulin alpha-1A chain OS=Mus musculus OX=10090 GN=Tuba1a PE=1 SV=1;Tubulin alpha-1C chain OS=Mus musculus OX=10090 GN=Tuba1c PE=1 SV=1	Tuba8	34311616	10	7.53544	1295	81.652		AAIVDGDRI	Serine/threonine-protein kinase MRCK beta OS=Mus musculus OX=10090 GN=Cdc42bpb PE=1 SV=2	Cdc42bpb	13115931	9	7.1178	336	53.5885
TTDSFDDYPPR	Eukaryotic translation initiation factor 4B OS=Mus musculus OX=10090 GN=Eif4b PE=1 SV=1	Eif4b	34274236	11	7.53497	1294	81.5889		SELARHTR	Adhesion G protein-coupled receptor L1 OS=Mus musculus OX=10090 GN=Adgrl1 PE=1 SV=2	Adgrl1	13079557	8	7.11659	335	53.429
RQYNMVPFWPPV	5,6-dihydroxyindole-2-carboxylic acid oxidase OS=Mus musculus OX=10090 GN=Tyrp1 PE=1 SV=1	Tyrp1	34222292	12	7.53431	1293	81.5259		RALSNLESI	Ubiquilin-3 OS=Mus musculus OX=10090 GN=Ubqln3 PE=1 SV=1	Ubqln3	13018941	9	7.11458	334	53.2695
RNGMILKP	60S ribosomal protein L13 OS=Mus musculus OX=10090 GN=Rpl13 PE=1 SV=3	Rpl13	34190588	8	7.53391	1292	81.4628		RSIQNAQFL	Lysosomal acid phosphatase OS=Mus musculus OX=10090 GN=Acp2 PE=1 SV=2	Acp2	13000181	9	7.11395	333	53.11
YMGRQPPPPP	Pancreas/duodenum homeobox protein 1 OS=Mus musculus OX=10090 GN=Pdx1 PE=1 SV=1	Pdx1	33824568	10	7.52923	1291	81.3997		AGTRNIYYL	Heat shock protein 75 kDa, mitochondrial OS=Mus musculus OX=10090 GN=Trap1 PE=1 SV=1	Trap1	12960081	9	7.11261	332	52.9506
FVKLISWYDNE	Glyceraldehyde-3-phosphate dehydrogenase OS=Mus musculus OX=10090 GN=Gapdh PE=1 SV=2	Gapdh	33816048	11	7.52912	1290	81.3367		DHPIVETLR	Heat shock protein HSP 90-beta OS=Mus musculus OX=10090 GN=Hsp90ab1 PE=1 SV=3	Hsp90ab1	12880035	9	7.10992	331	52.7911
SSVQNGIML	E3 ubiquitin-protein ligase Praja-2 OS=Mus musculus OX=10090 GN=Pja2 PE=1 SV=2	Pja2	33815976	9	7.52912	1289	81.2736		HIADLAGNP	Alpha-enolase OS=Mus musculus OX=10090 GN=Eno1 PE=1 SV=3	Eno1	12744763	9	7.10533	330	52.6316
RRVREEEIEVDS	Nucleolar and coiled-body phosphoprotein 1 OS=Mus musculus OX=10090 GN=Nolc1 PE=1 SV=1	Nolc1	33384900	12	7.52355	1288	81.2106		SAVASFVTQL	Nicastrin OS=Mus musculus OX=10090 GN=Ncstn PE=1 SV=3	Ncstn	12615313	10	7.1009	329	52.4721
KEDAANNY	Tubulin alpha-8 chain OS=Mus musculus OX=10090 GN=Tuba8 PE=1 SV=1;Tubulin alpha-1A chain OS=Mus musculus OX=10090 GN=Tuba1a PE=1 SV=1;Tubulin alpha-1C chain OS=Mus musculus OX=10090 GN=Tuba1c PE=1 SV=1	Tuba8	33128034	8	7.5202	1287	81.1475		ILGTNTIMDK	Heterogeneous nuclear ribonucleoprotein U OS=Mus musculus OX=10090 GN=Hnrnpu PE=1 SV=1	Hnrnpu	12562191	10	7.09907	328	52.3126
AALQSSWGMM	TAR DNA-binding protein 43 OS=Mus musculus OX=10090 GN=Tardbp PE=1 SV=1	Tardbp	33027768	10	7.51888	1286	81.0845		ASHLNLDAL	E3 ubiquitin-protein ligase TRIM32 OS=Mus musculus OX=10090 GN=Trim32 PE=1 SV=2	Trim32	12509519	9	7.09724	327	52.1531
TVIIEQSWGSPK	60 kDa heat shock protein, mitochondrial OS=Mus musculus OX=10090 GN=Hspd1 PE=1 SV=1	Hspd1	32957212	12	7.51795	1285	81.0214		SLEELRVAGIH	60S ribosomal protein L13 OS=Mus musculus OX=10090 GN=Rpl13 PE=1 SV=3	Rpl13	12383450	11	7.09284	326	51.9936
RDDWEEKRHF	Matrin-3 OS=Mus musculus OX=10090 GN=Matr3 PE=1 SV=1	Matr3	32911045	10	7.51734	1284	80.9584		IGIVKQAGLDR	Heterogeneous nuclear ribonucleoprotein F OS=Mus musculus OX=10090 GN=Hnrnpf PE=1 SV=3	Hnrnpf	12356032	11	7.09188	325	51.8341
GFGDSRGGGGNF	Heterogeneous nuclear ribonucleoproteins A2/B1 OS=Mus musculus OX=10090 GN=Hnrnpa2b1 PE=1 SV=2	Hnrnpa2b1	32739870	12	7.51508	1283	80.8953		TVIDEVRTGTY	Tubulin alpha-1B chain OS=Mus musculus OX=10090 GN=Tuba1b PE=1 SV=2	Tuba1b	12331961	11	7.09103	324	51.6746
APIRPDIVNF	60S ribosomal protein L4 OS=Mus musculus OX=10090 GN=Rpl4 PE=1 SV=3	Rpl4	32499802	10	7.51188	1282	80.8323		TLGAPLAP	Kinesin-like protein KIF18B OS=Mus musculus OX=10090 GN=Kif18b PE=2 SV=2	Kif18b	12296978	8	7.0898	323	51.5152
ATQVYPKL	BRISC and BRCA1-A complex member 2 OS=Mus musculus OX=10090 GN=Babam2 PE=1 SV=2	Babam2	32396960	8	7.5105	1281	80.7692		GFQNAILVR	Albumin OS=Mus musculus OX=10090 GN=Alb PE=1 SV=3	Alb	12205262	9	7.08655	322	51.3557
GGIQNVGHI	Inosine-5'-monophosphate dehydrogenase 2 OS=Mus musculus OX=10090 GN=Impdh2 PE=1 SV=2	Impdh2	32313632	9	7.50939	1280	80.7062		SDYPPLGR	Elongation factor 1-alpha 1 OS=Mus musculus OX=10090 GN=Eef1a1 PE=1 SV=3	Eef1a1	12130644	8	7.08388	321	51.1962
HEFLQTEI	DNA (cytosine-5)-methyltransferase 1 OS=Mus musculus OX=10090 GN=Dnmt1 PE=1 SV=5	Dnmt1	32263848	8	7.50872	1279	80.6431		KVFEYHNV	Amyloid protein-binding protein 2 OS=Mus musculus OX=10090 GN=Appbp2 PE=2 SV=1	Appbp2	12086654	8	7.08231	320	51.0367
FSETGAGKHVP	Tubulin alpha-1A chain OS=Mus musculus OX=10090 GN=Tuba1a PE=1 SV=1;Tubulin alpha-1C chain OS=Mus musculus OX=10090 GN=Tuba1c PE=1 SV=1	Tuba1a	32191916	11	7.50775	1278	80.5801		ASLVNSPSYL	Transmembrane protein 131-like OS=Mus musculus OX=10090 GN=Tmem131l PE=1 SV=1	Tmem131l	11999056	10	7.07915	319	50.8772
SQHVNLDQL	Beclin 1-associated autophagy-related key regulator OS=Mus musculus OX=10090 GN=Atg14 PE=1 SV=1	Atg14	31686970	9	7.50088	1277	80.517		SNYGPMKGGSF	Heterogeneous nuclear ribonucleoprotein A3 OS=Mus musculus OX=10090 GN=Hnrnpa3 PE=1 SV=1	Hnrnpa3	11919816	11	7.07627	318	50.7177
MTCGDVDVLI	DNA polymerase lambda OS=Mus musculus OX=10090 GN=Poll PE=2 SV=1	Poll	31576044	10	7.49936	1276	80.454		NGKLTGMAF	Glyceraldehyde-3-phosphate dehydrogenase OS=Mus musculus OX=10090 GN=Gapdh PE=1 SV=2	Gapdh	11756798	9	7.07029	317	50.5582
GLQFPVGRIH	Histone H2A.Z OS=Mus musculus OX=10090 GN=H2az1 PE=1 SV=2	H2az1	31561384	10	7.49916	1275	80.3909		DVNAAIATIKTK	Tubulin alpha-1B chain OS=Mus musculus OX=10090 GN=Tuba1b PE=1 SV=2	Tuba1b	11721169	12	7.06897	316	50.3987
SLGKNPTDAYL	Myosin regulatory light chain 12B OS=Mus musculus OX=10090 GN=Myl12b PE=1 SV=2	Myl12b	31331954	11	7.49599	1274	80.3279		DAGAGIALNDN	Glyceraldehyde-3-phosphate dehydrogenase OS=Mus musculus OX=10090 GN=Gapdh PE=1 SV=2	Gapdh	11681092	11	7.06748	315	50.2392
VGPVNKKGFYL	Ephrin type-A receptor 3 OS=Mus musculus OX=10090 GN=Epha3 PE=1 SV=1	Epha3	31253940	11	7.4949	1273	80.2648		GKKLEDGPKFL	Elongation factor 1-alpha 1 OS=Mus musculus OX=10090 GN=Eef1a1 PE=1 SV=3	Eef1a1	11622172	11	7.06529	314	50.0797
RFDGALNVDLTE	Tubulin alpha-8 chain OS=Mus musculus OX=10090 GN=Tuba8 PE=1 SV=1;Tubulin alpha-1A chain OS=Mus musculus OX=10090 GN=Tuba1a PE=1 SV=1;Tubulin alpha-1C chain OS=Mus musculus OX=10090 GN=Tuba1c PE=1 SV=1	Tuba8	31035088	12	7.49185	1272	80.2018		VAFAYKNV	Translocon-associated protein subunit gamma OS=Mus musculus OX=10090 GN=Ssr3 PE=1 SV=1	Ssr3	11620147	8	7.06521	313	49.9203
KIYQWINEL	CCR4-NOT transcription complex subunit 9 OS=Mus musculus OX=10090 GN=Cnot9 PE=1 SV=1	Cnot9	30997270	9	7.49132	1271	80.1387		RVMEYINRL	Clathrin heavy chain 1 OS=Mus musculus OX=10090 GN=Cltc PE=1 SV=3	Cltc	1.14796e+07	9	7.05992	312	49.7608
GPMKGGNF	Heterogeneous nuclear ribonucleoprotein A1 OS=Mus musculus OX=10090 GN=Hnrnpa1 PE=1 SV=2	Hnrnpa1	30930948	8	7.49039	1270	80.0757		KRLTKGGKKGA	40S ribosomal protein S3a OS=Mus musculus OX=10090 GN=Rps3a PE=1 SV=3	Rps3a	11469338	11	7.05954	311	49.6013
APSRNGMILKP	60S ribosomal protein L13 OS=Mus musculus OX=10090 GN=Rpl13 PE=1 SV=3	Rpl13	30837086	11	7.48907	1269	80.0126		SGLLNSQAL	Fatty acid synthase OS=Mus musculus OX=10090 GN=Fasn PE=1 SV=2	Fasn	11295401	9	7.0529	310	49.4418
YAVSELAGH	60S ribosomal protein L4 OS=Mus musculus OX=10090 GN=Rpl4 PE=1 SV=3	Rpl4	30784554	9	7.48833	1268	79.9496		SNYHFYSSI	Nuclear factor erythroid 2-related factor 2 OS=Mus musculus OX=10090 GN=Nfe2l2 PE=1 SV=2	Nfe2l2	11266968	9	7.05181	309	49.2823
AAIRNYGIEL	Methylenetetrahydrofolate reductase OS=Mus musculus OX=10090 GN=Mthfr PE=1 SV=2	Mthfr	30614966	10	7.48593	1267	79.8865		AAPIDRVGQTIE	Heterogeneous nuclear ribonucleoprotein M OS=Mus musculus OX=10090 GN=Hnrnpm PE=1 SV=3	Hnrnpm	11205336	12	7.04942	308	49.1228
RMPEKVTWM	60S ribosomal protein L19 OS=Mus musculus OX=10090 GN=Rpl19 PE=1 SV=1	Rpl19	30605611	9	7.4858	1266	79.8235		LSLENGTHTL	DNA (cytosine-5)-methyltransferase 1 OS=Mus musculus OX=10090 GN=Dnmt1 PE=1 SV=5	Dnmt1	11139932	10	7.04688	307	48.9633
ISGVNRYYV	NADH dehydrogenase [ubiquinone] 1 alpha subcomplex subunit 1 OS=Mus musculus OX=10090 GN=Ndufa1 PE=1 SV=1	Ndufa1	30528432	9	7.4847	1265	79.7604		AALKLGQEL	Protein flightless-1 homolog OS=Mus musculus OX=10090 GN=Flii PE=1 SV=1	Flii	11123443	9	7.04624	306	48.8038
IGIVKQAGL	Heterogeneous nuclear ribonucleoprotein F OS=Mus musculus OX=10090 GN=Hnrnpf PE=1 SV=3	Hnrnpf	30410490	9	7.48302	1264	79.6974		ATLLEFGW	Uncharacterized protein KIAA0825 homolog OS=Mus musculus OX=10090 PE=2 SV=3	?	11082895	8	7.04465	305	48.6443
KSIVNQVFL	E3 ubiquitin-protein ligase RNFT1 OS=Mus musculus OX=10090 GN=Rnft1 PE=2 SV=1	Rnft1	30359470	9	7.48229	1263	79.6343		GQLSNGDHHF	YTH domain-containing family protein 1 OS=Mus musculus OX=10090 GN=Ythdf1 PE=1 SV=1	Ythdf1	11065147	10	7.04396	304	48.4848
GEYGFQNAILVR	Albumin OS=Mus musculus OX=10090 GN=Alb PE=1 SV=3	Alb	30309906	12	7.48158	1262	79.5712		WAVSNREML	E3 ubiquitin-protein ligase RMND5A OS=Mus musculus OX=10090 GN=Rmnd5a PE=1 SV=2	Rmnd5a	11016463	9	7.04204	303	48.3254
VLDKLKAER	Elongation factor 1-alpha 1 OS=Mus musculus OX=10090 GN=Eef1a1 PE=1 SV=3	Eef1a1	30265050	9	7.48094	1261	79.5082		VQYKFSHL	Histone acetyltransferase KAT2A OS=Mus musculus OX=10090 GN=Kat2a PE=1 SV=2	Kat2a	10963598	8	7.03995	302	48.1659
YGYSNRVVDLM	Glyceraldehyde-3-phosphate dehydrogenase OS=Mus musculus OX=10090 GN=Gapdh PE=1 SV=2	Gapdh	30059070	11	7.47798	1260	79.4451		VADKFTEL	Serine/threonine-protein phosphatase 2A 65 kDa regulatory subunit A alpha isoform OS=Mus musculus OX=10090 GN=Ppp2r1a PE=1 SV=3	Ppp2r1a	10950697	8	7.03944	301	48.0064
NSLLTCRT	Fanconi anemia group A protein homolog OS=Mus musculus OX=10090 GN=Fanca PE=2 SV=2	Fanca	30017988	8	7.47738	1259	79.3821		VMYRVIQV	Upstream stimulatory factor 1 OS=Mus musculus OX=10090 GN=Usf1 PE=1 SV=1	Usf1	10927209	8	7.03851	300	47.8469
QSIAFISRL	Transmembrane protein 33 OS=Mus musculus OX=10090 GN=Tmem33 PE=1 SV=1	Tmem33	29940810	9	7.47626	1258	79.319		VITNFSARI	Vacuolar protein sorting-associated protein 51 homolog OS=Mus musculus OX=10090 GN=Vps51 PE=1 SV=2	Vps51	10889822	9	7.03702	299	47.6874
VAYWRQAGL	ATP synthase subunit epsilon, mitochondrial OS=Mus musculus OX=10090 GN=Atp5f1e PE=1 SV=2	Atp5f1e	29742506	9	7.47338	1257	79.256		HEFLQTEI	DNA (cytosine-5)-methyltransferase 1 OS=Mus musculus OX=10090 GN=Dnmt1 PE=1 SV=5	Dnmt1	10859434	8	7.03581	298	47.5279
HIYEFPQL	Protein unc-119 homolog B OS=Mus musculus OX=10090 GN=Unc119b PE=1 SV=1	Unc119b	29666594	8	7.47227	1256	79.1929		KSLLNSKDIM	Thiosulfate sulfurtransferase/rhodanese-like domain-containing protein 3 OS=Mus musculus OX=10090 GN=Tstd3 PE=1 SV=1	Tstd3	10858780	10	7.03578	297	47.3684
KIGRIEDVTP	40S ribosomal protein S14 OS=Mus musculus OX=10090 GN=Rps14 PE=1 SV=3	Rps14	29387458	10	7.46816	1255	79.1299		SQVLANGLDNK	40S ribosomal protein S18 OS=Mus musculus OX=10090 GN=Rps18 PE=1 SV=3	Rps18	10814014	11	7.03399	296	47.2089
RTVRGMLPHKTK	60S ribosomal protein L13a OS=Mus musculus OX=10090 GN=Rpl13a PE=1 SV=4	Rpl13a	29314330	12	7.46708	1254	79.0668		RAMGIALGGL	Chromaffin granule amine transporter OS=Mus musculus OX=10090 GN=Slc18a1 PE=1 SV=1	Slc18a1	10683513	10	7.02871	295	47.0494
FPRLHFFMP	Tubulin beta-3 chain OS=Mus musculus OX=10090 GN=Tubb3 PE=1 SV=1;Tubulin beta-5 chain OS=Mus musculus OX=10090 GN=Tubb5 PE=1 SV=1;Tubulin beta-4B chain OS=Mus musculus OX=10090 GN=Tubb4b PE=1 SV=1;Tubulin beta-6 chain OS=Mus musculus OX=10090 GN=Tubb6 PE=1 SV=1	Tubb3	29177666	9	7.46505	1253	79.0038		YQPYNKDWI	Enhancer of rudimentary homolog OS=Mus musculus OX=10090 GN=Erh PE=1 SV=1	Erh	10668120	9	7.02809	294	46.89
KQILNIYDL	Vacuolar protein sorting-associated protein 11 homolog OS=Mus musculus OX=10090 GN=Vps11 PE=1 SV=3	Vps11	29132510	9	7.46438	1252	78.9407		ALELRDNDKTR	Alpha-enolase OS=Mus musculus OX=10090 GN=Eno1 PE=1 SV=3	Eno1	10547384	11	7.02314	293	46.7305
WKVVNPYYL	5'-AMP-activated protein kinase catalytic subunit alpha-1 OS=Mus musculus OX=10090 GN=Prkaa1 PE=1 SV=2	Prkaa1	29061558	9	7.46332	1251	78.8777		RSRPETGRP	40S ribosomal protein S10 OS=Mus musculus OX=10090 GN=Rps10 PE=1 SV=1	Rps10	10545162	9	7.02305	292	46.571
GSSKLVPVGY	Elongation factor 1-beta OS=Mus musculus OX=10090 GN=Eef1b PE=1 SV=5	Eef1b	29049846	10	7.46314	1250	78.8146		RAIPNNQVL	Endothelial differentiation-related factor 1 OS=Mus musculus OX=10090 GN=Edf1 PE=1 SV=1	Edf1	10486342	9	7.02062	291	46.4115
HGIRWVVI	Aconitate hydratase, mitochondrial OS=Mus musculus OX=10090 GN=Aco2 PE=1 SV=1	Aco2	28886350	8	7.46069	1249	78.7516		SMEVNVDVL	Dysbindin OS=Mus musculus OX=10090 GN=Dtnbp1 PE=1 SV=1	Dtnbp1	10441330	9	7.01876	290	46.252
NRIIKTEVKKLQ	60S ribosomal protein L14 OS=Mus musculus OX=10090 GN=Rpl14 PE=1 SV=3	Rpl14	28749891	12	7.45864	1248	78.6885		RSLDNGGYYI	Tyrosine-protein kinase Blk OS=Mus musculus OX=10090 GN=Blk PE=1 SV=4	Blk	10372409	10	7.01588	289	46.0925
ALRDNSTMGY	Heat shock protein HSP 90-alpha OS=Mus musculus OX=10090 GN=Hsp90aa1 PE=1 SV=4;Heat shock protein HSP 90-beta OS=Mus musculus OX=10090 GN=Hsp90ab1 PE=1 SV=3	Hsp90aa1	28606500	10	7.45646	1247	78.6255		TGVTNRDLI	Rho GTPase-activating protein 21 OS=Mus musculus OX=10090 GN=Arhgap21 PE=1 SV=1	Arhgap21	10337351	9	7.01441	288	45.933
YMPQNPHII	Histone-binding protein RBBP7 OS=Mus musculus OX=10090 GN=Rbbp7 PE=1 SV=1	Rbbp7	28504192	9	7.45491	1246	78.5624		KIGRIEDVTP	40S ribosomal protein S14 OS=Mus musculus OX=10090 GN=Rps14 PE=1 SV=3	Rps14	10311127	10	7.01331	287	45.7735
KAPKIQRLVTP	40S ribosomal protein S6 OS=Mus musculus OX=10090 GN=Rps6 PE=1 SV=1	Rps6	28445904	11	7.45402	1245	78.4994		TAPQYYRL	DALR anticodon-binding domain-containing protein 3 OS=Mus musculus OX=10090 GN=Dalrd3 PE=2 SV=1	Dalrd3	10263576	8	7.0113	286	45.614
SLEDPQTH	Heat shock protein HSP 90-alpha OS=Mus musculus OX=10090 GN=Hsp90aa1 PE=1 SV=4;Heat shock protein HSP 90-beta OS=Mus musculus OX=10090 GN=Hsp90ab1 PE=1 SV=3	Hsp90aa1	28420236	8	7.45363	1244	78.4363		VGPKFRGV	Protein AAR2 homolog OS=Mus musculus OX=10090 GN=Aar2 PE=1 SV=3	Aar2	10207592	8	7.00892	285	45.4545
TSYRFLAL	HAUS augmin-like complex subunit 3 OS=Mus musculus OX=10090 GN=Haus3 PE=1 SV=1	Haus3	28351016	8	7.45257	1243	78.3733		YFDDLDNQIKKM	Cyclin-dependent kinase 1 OS=Mus musculus OX=10090 GN=Cdk1 PE=1 SV=3	Cdk1	10187212	12	7.00806	284	45.2951
RLMVHTVATF	Spectrin alpha chain, non-erythrocytic 1 OS=Mus musculus OX=10090 GN=Sptan1 PE=1 SV=4	Sptan1	28343557	10	7.45245	1242	78.3102		SLEDPQTHS	Heat shock protein HSP 90-beta OS=Mus musculus OX=10090 GN=Hsp90ab1 PE=1 SV=3	Hsp90ab1	10106423	9	7.0046	283	45.1356
GALKNTDYF	Cytosolic 5'-nucleotidase 3A OS=Mus musculus OX=10090 GN=Nt5c3a PE=1 SV=4	Nt5c3a	28250764	9	7.45103	1241	78.2472		LVSLRRCAGL	C-Jun-amino-terminal kinase-interacting protein 2 OS=Mus musculus OX=10090 GN=Mapk8ip2 PE=1 SV=1	Mapk8ip2	10072485	10	7.00314	282	44.9761
AAIVDGDRI	Serine/threonine-protein kinase MRCK beta OS=Mus musculus OX=10090 GN=Cdc42bpb PE=1 SV=2	Cdc42bpb	28224154	9	7.45062	1240	78.1841		KLPKQPVIVK	60S ribosomal protein L27a OS=Mus musculus OX=10090 GN=Rpl27a PE=1 SV=5	Rpl27a	10062322	10	7.0027	281	44.8166
VAYMNPIAM	Protein FAM133B OS=Mus musculus OX=10090 GN=Fam133b PE=1 SV=3	Fam133b	28207942	9	7.45037	1239	78.1211		GPMKSGNFGGS	Heterogeneous nuclear ribonucleoproteins A2/B1 OS=Mus musculus OX=10090 GN=Hnrnpa2b1 PE=1 SV=2	Hnrnpa2b1	10061122	11	7.00265	280	44.6571
TVKNLHLTS	Histone-lysine N-methyltransferase SETD1A OS=Mus musculus OX=10090 GN=Setd1a PE=1 SV=1	Setd1a	28072636	9	7.44828	1238	78.058		RIEEELGSKAKF	Alpha-enolase OS=Mus musculus OX=10090 GN=Eno1 PE=1 SV=3	Eno1	10059285	12	7.00257	279	44.4976
LSLENGTHTL	DNA (cytosine-5)-methyltransferase 1 OS=Mus musculus OX=10090 GN=Dnmt1 PE=1 SV=5	Dnmt1	28025536	10	7.44755	1237	77.995		SAVRPASL	Dedicator of cytokinesis protein 7 OS=Mus musculus OX=10090 GN=Dock7 PE=1 SV=3	Dock7	10053078	8	7.0023	278	44.3381
KVNVVEQEKIDK	Alpha-enolase OS=Mus musculus OX=10090 GN=Eno1 PE=1 SV=3	Eno1	27980368	12	7.44685	1236	77.9319		SAVENLNEM	N-alpha-acetyltransferase 15, NatA auxiliary subunit OS=Mus musculus OX=10090 GN=Naa15 PE=1 SV=1	Naa15	9995564	9	6.99981	277	44.1786
GDSRGGGGNFGP	Heterogeneous nuclear ribonucleoproteins A2/B1 OS=Mus musculus OX=10090 GN=Hnrnpa2b1 PE=1 SV=2	Hnrnpa2b1	27771556	12	7.4436	1235	77.8689		TKGGPDFSNLEK	NudC domain-containing protein 2 OS=Mus musculus OX=10090 GN=Nudcd2 PE=1 SV=1	Nudcd2	9937929	12	6.9973	276	44.0191
IPELNGKLTG	Glyceraldehyde-3-phosphate dehydrogenase OS=Mus musculus OX=10090 GN=Gapdh PE=1 SV=2	Gapdh	27707970	10	7.4426	1234	77.8058		KVNVVEQEKIDK	Alpha-enolase OS=Mus musculus OX=10090 GN=Eno1 PE=1 SV=3	Eno1	9936046	12	6.99721	275	43.8596
GNFGGSRNMGGP	Heterogeneous nuclear ribonucleoproteins A2/B1 OS=Mus musculus OX=10090 GN=Hnrnpa2b1 PE=1 SV=2	Hnrnpa2b1	27426938	12	7.43818	1233	77.7427		APSRNGMILKP	60S ribosomal protein L13 OS=Mus musculus OX=10090 GN=Rpl13 PE=1 SV=3	Rpl13	9784222	11	6.99053	274	43.7002
KRVLALSVETE	60S acidic ribosomal protein P0 OS=Mus musculus OX=10090 GN=Rplp0 PE=1 SV=3	Rplp0	27347749	11	7.43692	1232	77.6797		ALIMEQFI	Transmembrane protein 229B OS=Mus musculus OX=10090 GN=TMEM229B PE=2 SV=1	TMEM229B	9760302	8	6.98946	273	43.5407
GWTANMERIMK	Heat shock protein HSP 90-alpha OS=Mus musculus OX=10090 GN=Hsp90aa1 PE=1 SV=4;Heat shock protein HSP 90-beta OS=Mus musculus OX=10090 GN=Hsp90ab1 PE=1 SV=3	Hsp90aa1	2.73375e+07	11	7.43676	1231	77.6166		VNVERVLNV	Probable helicase with zinc finger domain OS=Mus musculus OX=10090 GN=Helz PE=1 SV=2	Helz	9713929	9	6.98739	272	43.3812
SIPGKDPDSP	Transmembrane glycoprotein NMB OS=Mus musculus OX=10090 GN=Gpnmb PE=1 SV=2	Gpnmb	27320982	10	7.4365	1230	77.5536		KRVLALSVETE	60S acidic ribosomal protein P0 OS=Mus musculus OX=10090 GN=Rplp0 PE=1 SV=3	Rplp0	9684835	11	6.98609	271	43.2217
LRPPKVKMEQRE	DnaJ homolog subfamily C member 8 OS=Mus musculus OX=10090 GN=Dnajc8 PE=1 SV=2	Dnajc8	27289578	12	7.436	1229	77.4905		KLAVNMVP	Tubulin beta-5 chain OS=Mus musculus OX=10090 GN=Tubb5 PE=1 SV=1;Tubulin beta-4B chain OS=Mus musculus OX=10090 GN=Tubb4b PE=1 SV=1	Tubb5	9671380	8	6.98549	270	43.0622
VSLLREVAR	26S proteasome non-ATPase regulatory subunit 5 OS=Mus musculus OX=10090 GN=Psmd5 PE=1 SV=4	Psmd5	27243294	9	7.43526	1228	77.4275		EVHTGLGELLR	Serpin H1 OS=Mus musculus OX=10090 GN=Serpinh1 PE=1 SV=3	Serpinh1	9665545	11	6.98523	269	42.9027
VGDIPGVRF	40S ribosomal protein S23 OS=Mus musculus OX=10090 GN=Rps23 PE=1 SV=3	Rps23	27228510	9	7.43502	1227	77.3644		KSITFSKL	Delta(3,5)-Delta(2,4)-dienoyl-CoA isomerase, mitochondrial OS=Mus musculus OX=10090 GN=Ech1 PE=1 SV=1	Ech1	9646078	8	6.98435	268	42.7432
AAMKNVTEL	14-3-3 protein gamma OS=Mus musculus OX=10090 GN=Ywhag PE=1 SV=2	Ywhag	27191624	9	7.43444	1226	77.3014		SSYKFNHL	Protein farnesyltransferase subunit beta OS=Mus musculus OX=10090 GN=Fntb PE=1 SV=1	Fntb	9639439	8	6.98405	267	42.5837
YIGIVKQAGLDR	Heterogeneous nuclear ribonucleoprotein F OS=Mus musculus OX=10090 GN=Hnrnpf PE=1 SV=3	Hnrnpf	27177604	12	7.43421	1225	77.2383		QQFVGDALDRT	Semaphorin-3E OS=Mus musculus OX=10090 GN=Sema3e PE=1 SV=3	Sema3e	9585721	11	6.98162	266	42.4242
RVYEFLDKL	26S proteasome non-ATPase regulatory subunit 3 OS=Mus musculus OX=10090 GN=Psmd3 PE=1 SV=3	Psmd3	27139225	9	7.4336	1224	77.1753		GVKFVNPKFP	Nucleolar protein 8 OS=Mus musculus OX=10090 GN=Nol8 PE=1 SV=2	Nol8	9584932	10	6.98159	265	42.2648
QILSDFPKL	Nucleolar GTP-binding protein 1 OS=Mus musculus OX=10090 GN=Gtpbp4 PE=1 SV=3	Gtpbp4	27118150	9	7.43326	1223	77.1122		IPELNGKLTG	Glyceraldehyde-3-phosphate dehydrogenase OS=Mus musculus OX=10090 GN=Gapdh PE=1 SV=2	Gapdh	9559549	10	6.98044	264	42.1053
GGIGTVPVGR	Elongation factor 1-alpha 1 OS=Mus musculus OX=10090 GN=Eef1a1 PE=1 SV=3	Eef1a1	27069366	10	7.43248	1222	77.0492		AAIENIEHL	Leucine-rich PPR motif-containing protein, mitochondrial OS=Mus musculus OX=10090 GN=Lrpprc PE=1 SV=2	Lrpprc	9549782	9	6.97999	263	41.9458
KVVDPFSKKDW	40S ribosomal protein S3a OS=Mus musculus OX=10090 GN=Rps3a PE=1 SV=3	Rps3a	27042096	11	7.43204	1221	76.9861		TAPVQLYK	Hermansky-Pudlak syndrome 3 protein homolog OS=Mus musculus OX=10090 GN=Hps3 PE=2 SV=2	Hps3	9543529	8	6.97971	262	41.7863
VITEEEKNFKAF	60S ribosomal protein L13 OS=Mus musculus OX=10090 GN=Rpl13 PE=1 SV=3	Rpl13	27033748	12	7.43191	1220	76.9231		VLDKLKAER	Elongation factor 1-alpha 1 OS=Mus musculus OX=10090 GN=Eef1a1 PE=1 SV=3	Eef1a1	9537799	9	6.97945	261	41.6268
VGPRYTQL	Mitogen-activated protein kinase 3 OS=Mus musculus OX=10090 GN=Mapk3 PE=1 SV=5	Mapk3	26910092	8	7.42992	1219	76.86		KIITYRNL	PCI domain-containing protein 2 OS=Mus musculus OX=10090 GN=Pcid2 PE=1 SV=1	Pcid2	9535273	8	6.97933	260	41.4673
RLTKHEEKLKTK	60S ribosomal protein L35 OS=Mus musculus OX=10090 GN=Rpl35 PE=1 SV=1	Rpl35	26873786	12	7.42933	1218	76.797		GQVVIIHML	AP-3 complex subunit beta-1 OS=Mus musculus OX=10090 GN=Ap3b1 PE=1 SV=2	Ap3b1	9453729	9	6.9756	259	41.3078
RNFIFSRL	Lymphocyte-specific helicase OS=Mus musculus OX=10090 GN=Hells PE=1 SV=2	Hells	26813678	8	7.42836	1217	76.7339		FSETGAGKHVP	Tubulin alpha-1B chain OS=Mus musculus OX=10090 GN=Tuba1b PE=1 SV=2	Tuba1b	9434847	11	6.97473	258	41.1483
RGNGLIKVNGRP	40S ribosomal protein S16 OS=Mus musculus OX=10090 GN=Rps16 PE=1 SV=4	Rps16	26785938	12	7.42791	1216	76.6709		SLVRKIVER	Trifunctional purine biosynthetic protein adenosine-3 OS=Mus musculus OX=10090 GN=Gart PE=1 SV=3	Gart	9376804	9	6.97205	257	40.9888
PKFEVIDKPQS	ATP synthase-coupling factor 6, mitochondrial OS=Mus musculus OX=10090 GN=Atp5pf PE=1 SV=1	Atp5pf	26767112	11	7.4276	1215	76.6078		GAIQVLPKM	Voltage-gated potassium channel subunit beta-1 OS=Mus musculus OX=10090 GN=Kcnab1 PE=1 SV=2	Kcnab1	9355422	9	6.97106	256	40.8293
FHWEQDQIAHM	ATP-binding cassette sub-family F member 2 OS=Mus musculus OX=10090 GN=Abcf2 PE=1 SV=1	Abcf2	26663284	11	7.42591	1214	76.5448		FVKELSEA	Glycine--tRNA ligase OS=Mus musculus OX=10090 GN=Gars1 PE=1 SV=1	Gars1	9313895	8	6.96913	255	40.6699
GLRNVQAEEMVE	ATP synthase subunit alpha, mitochondrial OS=Mus musculus OX=10090 GN=Atp5f1a PE=1 SV=1	Atp5f1a	26576486	12	7.4245	1213	76.4817		GQLSNGDHHFM	YTH domain-containing family protein 1 OS=Mus musculus OX=10090 GN=Ythdf1 PE=1 SV=1	Ythdf1	9288756	11	6.96796	254	40.5104
AMADTFLEHM	Pyruvate kinase PKM OS=Mus musculus OX=10090 GN=Pkm PE=1 SV=4	Pkm	26556742	10	7.42417	1212	76.4187		AALENDKTI	WD repeat-containing protein 5B OS=Mus musculus OX=10090 GN=Wdr5b PE=1 SV=1	Wdr5b	9270609	9	6.96711	253	40.3509
EAVVISGRKLA	Bifunctional methylenetetrahydrofolate dehydrogenase/cyclohydrolase, mitochondrial OS=Mus musculus OX=10090 GN=Mthfd2 PE=1 SV=1	Mthfd2	26506824	11	7.42336	1211	76.3556		AAGVGDMVM	60S ribosomal protein L23 OS=Mus musculus OX=10090 GN=Rpl23 PE=1 SV=1	Rpl23	9208406	9	6.96418	252	40.1914
EVHTGLGELLR	Serpin H1 OS=Mus musculus OX=10090 GN=Serpinh1 PE=1 SV=3	Serpinh1	26316696	11	7.42023	1210	76.2926		SLEDPQTH	Heat shock protein HSP 90-alpha OS=Mus musculus OX=10090 GN=Hsp90aa1 PE=1 SV=4;Heat shock protein HSP 90-beta OS=Mus musculus OX=10090 GN=Hsp90ab1 PE=1 SV=3	Hsp90aa1	9178259	8	6.96276	251	40.0319
LMKEILDKKVEK	Heat shock protein HSP 90-beta OS=Mus musculus OX=10090 GN=Hsp90ab1 PE=1 SV=3	Hsp90ab1	2.63135e+07	12	7.42018	1209	76.2295		AMADTFLEHM	Pyruvate kinase PKM OS=Mus musculus OX=10090 GN=Pkm PE=1 SV=4	Pkm	9.15874e+06	10	6.96184	250	39.8724
SQISNTEFL	BRISC complex subunit Abraxas 2 OS=Mus musculus OX=10090 GN=Abraxas2 PE=1 SV=1	Abraxas2	26239344	9	7.41895	1208	76.1665		VQLTVREAINQ	Pyruvate dehydrogenase E1 component subunit beta, mitochondrial OS=Mus musculus OX=10090 GN=Pdhb PE=1 SV=1	Pdhb	9134651	11	6.96069	249	39.7129
SIANFTNV	ATP-citrate synthase OS=Mus musculus OX=10090 GN=Acly PE=1 SV=1	Acly	26127546	8	7.4171	1207	76.1034		YAVSELAGH	60S ribosomal protein L4 OS=Mus musculus OX=10090 GN=Rpl4 PE=1 SV=3	Rpl4	9107801	9	6.95941	248	39.5534
VIPELNGK	Glyceraldehyde-3-phosphate dehydrogenase OS=Mus musculus OX=10090 GN=Gapdh PE=1 SV=2	Gapdh	26044116	8	7.41571	1206	76.0404		SQYRFEHL	GTP-binding protein 2 OS=Mus musculus OX=10090 GN=Gtpbp2 PE=1 SV=1	Gtpbp2	8948983	8	6.95177	247	39.3939
REPDTFMDQKI	Cadherin-1 OS=Mus musculus OX=10090 GN=Cdh1 PE=1 SV=1	Cdh1	25875711	11	7.41289	1205	75.9773		GMANLLTGPK	Synaptic vesicle membrane protein VAT-1 homolog OS=Mus musculus OX=10090 GN=Vat1 PE=1 SV=3	Vat1	8905057	10	6.94964	246	39.2344
LNGKLTGMAF	Glyceraldehyde-3-phosphate dehydrogenase OS=Mus musculus OX=10090 GN=Gapdh PE=1 SV=2	Gapdh	25857648	10	7.41259	1204	75.9142		SAISNLDYI	Guanine nucleotide exchange factor VAV3 OS=Mus musculus OX=10090 GN=Vav3 PE=1 SV=2	Vav3	8810934	9	6.94502	245	39.075
MLDKLTGVF	40S ribosomal protein S4, X isoform OS=Mus musculus OX=10090 GN=Rps4x PE=1 SV=2	Rps4x	25824400	9	7.41203	1203	75.8512		SIVSYNHL	Inositol-3-phosphate synthase 1 OS=Mus musculus OX=10090 GN=Isyna1 PE=1 SV=1	Isyna1	8809498	8	6.94495	244	38.9155
GGNVLGPKSVA	60S ribosomal protein L7a OS=Mus musculus OX=10090 GN=Rpl7a PE=1 SV=2	Rpl7a	25789998	11	7.41145	1202	75.7881		VGITYQHI	Eukaryotic translation initiation factor 3 subunit K OS=Mus musculus OX=10090 GN=Eif3k PE=1 SV=1	Eif3k	8760445	8	6.94253	243	38.756
RSPSLLQSGVKK	Myb-binding protein 1A OS=Mus musculus OX=10090 GN=Mybbp1a PE=1 SV=2	Mybbp1a	25757630	12	7.41091	1201	75.7251		ASLSNLHSL	Protein chibby homolog 1 OS=Mus musculus OX=10090 GN=Cby1 PE=1 SV=1	Cby1	8734645	9	6.94125	242	38.5965
KIKIIAPPERK	Actin, cytoplasmic 1 OS=Mus musculus OX=10090 GN=Actb PE=1 SV=1;Actin, alpha cardiac muscle 1 OS=Mus musculus OX=10090 GN=Actc1 PE=1 SV=1	Actb	25657924	11	7.40922	1200	75.662		GIIDPTKVVR	60 kDa heat shock protein, mitochondrial OS=Mus musculus OX=10090 GN=Hspd1 PE=1 SV=1	Hspd1	8683223	10	6.93868	241	38.437
SSTPEVKA	Serine-threonine kinase receptor-associated protein OS=Mus musculus OX=10090 GN=Strap PE=1 SV=2	Strap	25528818	8	7.40703	1199	75.599		HNVTLTLSL	Netrin-1 OS=Mus musculus OX=10090 GN=Ntn1 PE=1 SV=3	Ntn1	8641526	9	6.93659	240	38.2775
SLKGVDPKFLR	60S ribosomal protein L29 OS=Mus musculus OX=10090 GN=Rpl29 PE=1 SV=2	Rpl29	25429710	11	7.40534	1198	75.5359		VIHDNFGIVEG	Glyceraldehyde-3-phosphate dehydrogenase OS=Mus musculus OX=10090 GN=Gapdh PE=1 SV=2	Gapdh	8567124	11	6.93284	239	38.118
VIHDNFGIVEG	Glyceraldehyde-3-phosphate dehydrogenase OS=Mus musculus OX=10090 GN=Gapdh PE=1 SV=2	Gapdh	25332388	11	7.40368	1197	75.4729		VALLNKTNV	Catenin beta-1 OS=Mus musculus OX=10090 GN=Ctnnb1 PE=1 SV=1	Ctnnb1	8506289	9	6.92974	238	37.9585
KIGGIGTVPVGR	Elongation factor 1-alpha 1 OS=Mus musculus OX=10090 GN=Eef1a1 PE=1 SV=3	Eef1a1	25311690	12	7.40332	1196	75.4098		TSPEYQKL	Alsin OS=Mus musculus OX=10090 GN=Als2 PE=1 SV=3	Als2	8421966	8	6.92541	237	37.799
QPNWIASP	Protein cramped-like OS=Mus musculus OX=10090 GN=Cramp1 PE=1 SV=3	Cramp1	25260162	8	7.40244	1195	75.3468		TSPHYQNL	Tyrosine-protein phosphatase non-receptor type 18 OS=Mus musculus OX=10090 GN=Ptpn18 PE=1 SV=1	Ptpn18	8396635	8	6.92411	236	37.6396
LRPLVKPKIVK	60S ribosomal protein L32 OS=Mus musculus OX=10090 GN=Rpl32 PE=1 SV=2	Rpl32	25198423	11	7.40137	1194	75.2837		TELNYKNTE	Ig gamma-2A chain C region, membrane-bound form OS=Mus musculus OX=10090 GN=Igh-1a PE=1 SV=3	Igh-1a	8392161	9	6.92387	235	37.4801
SSRFIPLK	40S ribosomal protein S15 OS=Mus musculus OX=10090 GN=Rps15 PE=1 SV=2	Rps15	25198238	8	7.40137	1193	75.2207		VGDIPGVRF	40S ribosomal protein S23 OS=Mus musculus OX=10090 GN=Rps23 PE=1 SV=3	Rps23	8.3196e+06	9	6.9201	234	37.3206
VSSINQEAL	Chromatin accessibility complex protein 1 OS=Mus musculus OX=10090 GN=Chrac1 PE=1 SV=1	Chrac1	25152162	9	7.40058	1192	75.1576		SSIVSSIEF	E3 ubiquitin-protein ligase COP1 OS=Mus musculus OX=10090 GN=Cop1 PE=1 SV=2	Cop1	8285751	9	6.91833	233	37.1611
MLQLVQFHV	Elongation of very long chain fatty acids protein 4 OS=Mus musculus OX=10090 GN=Elovl4 PE=1 SV=2	Elovl4	25029042	9	7.39844	1191	75.0946		VIPELNGK	Glyceraldehyde-3-phosphate dehydrogenase OS=Mus musculus OX=10090 GN=Gapdh PE=1 SV=2	Gapdh	8278972	8	6.91798	232	37.0016
ASLVNADKL	Vacuolar protein sorting-associated protein 33B OS=Mus musculus OX=10090 GN=Vps33b PE=1 SV=1	Vps33b	25016364	9	7.39822	1190	75.0315		KETIQKKK	Inactive dipeptidyl peptidase 10 OS=Mus musculus OX=10090 GN=Dpp10 PE=1 SV=1	Dpp10	8.26659e+06	8	6.91733	231	36.8421
GRGFGDGYNG	Heterogeneous nuclear ribonucleoproteins A2/B1 OS=Mus musculus OX=10090 GN=Hnrnpa2b1 PE=1 SV=2	Hnrnpa2b1	24827352	10	7.39493	1189	74.9685		RNGMILKP	60S ribosomal protein L13 OS=Mus musculus OX=10090 GN=Rpl13 PE=1 SV=3	Rpl13	8.24071e+06	8	6.91596	230	36.6826
ALGEEWKGY	40S ribosomal protein S6 OS=Mus musculus OX=10090 GN=Rps6 PE=1 SV=1	Rps6	24807142	9	7.39458	1188	74.9054		KIKIIAPPERK	Actin, cytoplasmic 1 OS=Mus musculus OX=10090 GN=Actb PE=1 SV=1	Actb	8.20015e+06	11	6.91382	229	36.5231
VPTPNVSVVDLT	Glyceraldehyde-3-phosphate dehydrogenase OS=Mus musculus OX=10090 GN=Gapdh PE=1 SV=2	Gapdh	24632342	12	7.39151	1187	74.8424		YVVDNIDHL	E3 ubiquitin-protein ligase COP1 OS=Mus musculus OX=10090 GN=Cop1 PE=1 SV=2	Cop1	8195151	9	6.91356	228	36.3636
SAVENLNEM	N-alpha-acetyltransferase 15, NatA auxiliary subunit OS=Mus musculus OX=10090 GN=Naa15 PE=1 SV=1	Naa15	24586294	9	7.39069	1186	74.7793		RSLRFVTL	Lysosomal acid phosphatase OS=Mus musculus OX=10090 GN=Acp2 PE=1 SV=2	Acp2	8.16943e+06	8	6.91219	227	36.2041
YYPPSQIAQL	Polyadenylate-binding protein 1 OS=Mus musculus OX=10090 GN=Pabpc1 PE=1 SV=2	Pabpc1	24529906	10	7.3897	1185	74.7163		VQPTHVIHL	GDP-L-fucose synthase OS=Mus musculus OX=10090 GN=Tsta3 PE=1 SV=3	Tsta3	8169312	9	6.91219	226	36.0447
SAIFNFQSL	Protein kish-A OS=Mus musculus OX=10090 GN=Tmem167a PE=1 SV=1	Tmem167a	24499336	9	7.38915	1184	74.6532		RRVREEEIEVDS	Nucleolar and coiled-body phosphoprotein 1 OS=Mus musculus OX=10090 GN=Nolc1 PE=1 SV=1	Nolc1	8166515	12	6.91204	225	35.8852
VSTTNIAGHF	Rho guanine nucleotide exchange factor 2 OS=Mus musculus OX=10090 GN=Arhgef2 PE=1 SV=4	Arhgef2	24372794	10	7.38691	1183	74.5902		LAVICMVW	Probable G-protein coupled receptor 85 OS=Mus musculus OX=10090 GN=Gpr85 PE=2 SV=1	Gpr85	8157272	8	6.91154	224	35.7257
RKIEEIKDF	60S ribosomal protein L38 OS=Mus musculus OX=10090 GN=Rpl38 PE=1 SV=3	Rpl38	24278860	9	7.38523	1182	74.5271		VNEIFMAIAK	Ras-related protein Rab-5C OS=Mus musculus OX=10090 GN=Rab5c PE=1 SV=2	Rab5c	8148730	10	6.91109	223	35.5662
ESFSDYPPLGRF	Elongation factor 1-alpha 1 OS=Mus musculus OX=10090 GN=Eef1a1 PE=1 SV=3	Eef1a1	24187734	12	7.3836	1181	74.4641		KSISNPPGSNL	Serine/threonine-protein kinase WNK1 OS=Mus musculus OX=10090 GN=Wnk1 PE=1 SV=2	Wnk1	8126938	11	6.90993	222	35.4067
KKVVDPFSKKDW	40S ribosomal protein S3a OS=Mus musculus OX=10090 GN=Rps3a PE=1 SV=3	Rps3a	24093650	12	7.3819	1180	74.401		GFGDSRGGGGNF	Heterogeneous nuclear ribonucleoproteins A2/B1 OS=Mus musculus OX=10090 GN=Hnrnpa2b1 PE=1 SV=2	Hnrnpa2b1	8.08058e+06	12	6.90744	221	35.2472
FSNLFGGEPL	Transferrin receptor protein 1 OS=Mus musculus OX=10090 GN=Tfrc PE=1 SV=1	Tfrc	24005780	10	7.38032	1179	74.338		SFNKEEVLK	T-cell-specific guanine nucleotide triphosphate-binding protein 1 OS=Mus musculus OX=10090 GN=Tgtp1 PE=1 SV=1	Tgtp1	8069423	9	6.90684	220	35.0877
ASLSNLHSL	Protein chibby homolog 1 OS=Mus musculus OX=10090 GN=Cby1 PE=1 SV=1	Cby1	23957352	9	7.37944	1178	74.2749		RSLSNATII	Signal recognition particle 54 kDa protein OS=Mus musculus OX=10090 GN=Srp54 PE=1 SV=2	Srp54	8064169	9	6.90656	219	34.9282
GIIDPTKVVR	60 kDa heat shock protein, mitochondrial OS=Mus musculus OX=10090 GN=Hspd1 PE=1 SV=1	Hspd1	23915158	10	7.37867	1177	74.2119		GDSRGGGGNFGP	Heterogeneous nuclear ribonucleoproteins A2/B1 OS=Mus musculus OX=10090 GN=Hnrnpa2b1 PE=1 SV=2	Hnrnpa2b1	8.05118e+06	12	6.90586	218	34.7687
QVVQFNRL	Ragulator complex protein LAMTOR3 OS=Mus musculus OX=10090 GN=Lamtor3 PE=1 SV=1	Lamtor3	23891210	8	7.37824	1176	74.1488		YYLKKTISRSPG	Ig gamma-2B chain C region OS=Mus musculus OX=10090 GN=Igh-3 PE=1 SV=3	Igh-3	8.0339e+06	12	6.90493	217	34.6093
FSGILRVT	Sacsin OS=Mus musculus OX=10090 GN=Sacs PE=1 SV=2	Sacs	23747138	8	7.37561	1175	74.0858		SGYDFSRL	Sterol regulatory element-binding protein cleavage-activating protein OS=Mus musculus OX=10090 GN=Scap PE=1 SV=1	Scap	8.0222e+06	8	6.90429	216	34.4498
SMPRALVSPL	G2 and S phase-expressed protein 1 OS=Mus musculus OX=10090 GN=Gtse1 PE=1 SV=2	Gtse1	23741964	10	7.37552	1174	74.0227		TSPINAEKL	Myosin light chain kinase, smooth muscle OS=Mus musculus OX=10090 GN=Mylk PE=1 SV=3	Mylk	7987380	9	6.9024	215	34.2903
TSVENHEFL	Protein ELYS OS=Mus musculus OX=10090 GN=Ahctf1 PE=1 SV=1	Ahctf1	23617802	9	7.37324	1173	73.9596		KNLFSPIMSEN	Pro-interleukin-16 OS=Mus musculus OX=10090 GN=Il16 PE=1 SV=3	Il16	7970842	11	6.9015	214	34.1308
GPMKGGSF	Heterogeneous nuclear ribonucleoprotein A3 OS=Mus musculus OX=10090 GN=Hnrnpa3 PE=1 SV=1	Hnrnpa3	23592426	8	7.37277	1172	73.8966		KIEEIKDF	60S ribosomal protein L38 OS=Mus musculus OX=10090 GN=Rpl38 PE=1 SV=3	Rpl38	7902425	8	6.89776	213	33.9713
YIGIVKQA	Heterogeneous nuclear ribonucleoprotein F OS=Mus musculus OX=10090 GN=Hnrnpf PE=1 SV=3	Hnrnpf	23509898	8	7.37125	1171	73.8335		KFLPSELRDEH	Talin-1 OS=Mus musculus OX=10090 GN=Tln1 PE=1 SV=2	Tln1	7.88781e+06	11	6.89696	212	33.8118
AILVDLEPGTM	Tubulin beta-3 chain OS=Mus musculus OX=10090 GN=Tubb3 PE=1 SV=1;Tubulin beta-5 chain OS=Mus musculus OX=10090 GN=Tubb5 PE=1 SV=1	Tubb3	23448440	11	7.37011	1170	73.7705		KAAVVAGAVV	Endothelial cell-selective adhesion molecule OS=Mus musculus OX=10090 GN=Esam PE=1 SV=1	Esam	7848144	10	6.89477	211	33.6523
EPWNKLGP	Cytochrome c oxidase subunit NDUFA4 OS=Mus musculus OX=10090 GN=Ndufa4 PE=1 SV=2	Ndufa4	23371070	8	7.36868	1169	73.7074		KSVINTTLV	Lysosome membrane protein 2 OS=Mus musculus OX=10090 GN=Scarb2 PE=1 SV=3	Scarb2	7835968	9	6.89409	210	33.4928
FTDEESRVF	Bcl-2-associated transcription factor 1 OS=Mus musculus OX=10090 GN=Bclaf1 PE=1 SV=2	Bclaf1	23330702	9	7.36793	1168	73.6444		AQVIILNHPG	Elongation factor 1-alpha 1 OS=Mus musculus OX=10090 GN=Eef1a1 PE=1 SV=3	Eef1a1	7824415	10	6.89345	209	33.3333
VLRPPGGGSNF	Jupiter microtubule associated homolog 1 OS=Mus musculus OX=10090 GN=Jpt1 PE=1 SV=3	Jpt1	23295242	11	7.36727	1167	73.5813		DQIQNAQYL	Heterogeneous nuclear ribonucleoprotein K OS=Mus musculus OX=10090 GN=Hnrnpk PE=1 SV=1	Hnrnpk	7816426	9	6.89301	208	33.1738
GVRLLQDSVDF	Vimentin OS=Mus musculus OX=10090 GN=Vim PE=1 SV=3	Vim	23224260	11	7.36594	1166	73.5183		LVGNRAPVAI	Eukaryotic translation initiation factor 2D OS=Mus musculus OX=10090 GN=Eif2d PE=1 SV=3	Eif2d	7.77801e+06	10	6.89087	207	33.0144
QSIEFSRL	Eukaryotic translation initiation factor 3 subunit A OS=Mus musculus OX=10090 GN=Eif3a PE=1 SV=5	Eif3a	23219858	8	7.36586	1165	73.4552		KIGGIGTVPVGR	Elongation factor 1-alpha 1 OS=Mus musculus OX=10090 GN=Eef1a1 PE=1 SV=3	Eef1a1	7643282	12	6.88328	206	32.8549
AQVIILNHPG	Elongation factor 1-alpha 1 OS=Mus musculus OX=10090 GN=Eef1a1 PE=1 SV=3	Eef1a1	23189222	10	7.36529	1164	73.3922		VVADPTVPN	Rho GDP-dissociation inhibitor 2 OS=Mus musculus OX=10090 GN=Arhgdib PE=1 SV=3	Arhgdib	7.60591e+06	9	6.88115	205	32.6954
YGPENTLPTL	G2/M phase-specific E3 ubiquitin-protein ligase OS=Mus musculus OX=10090 GN=G2e3 PE=2 SV=2	G2e3	23145492	10	7.36447	1163	73.3291		AALNNHVEV	E3 ubiquitin-protein ligase MIB1 OS=Mus musculus OX=10090 GN=Mib1 PE=1 SV=1	Mib1	7519320	9	6.87618	204	32.5359
KVVKVANVSLLA	40S ribosomal protein S23 OS=Mus musculus OX=10090 GN=Rps23 PE=1 SV=3	Rps23	23067465	12	7.363	1162	73.2661		AYFHEEDETSF	Eukaryotic translation initiation factor 3 subunit D OS=Mus musculus OX=10090 GN=Eif3d PE=1 SV=2	Eif3d	7499487	11	6.87503	203	32.3764
SPSLLQSGVKK	Myb-binding protein 1A OS=Mus musculus OX=10090 GN=Mybbp1a PE=1 SV=2	Mybbp1a	2.30572e+07	11	7.36281	1161	73.203		DALASLTQ	Pentraxin-4 OS=Mus musculus OX=10090 GN=Ptx4 PE=1 SV=2	Ptx4	7407958	8	6.8697	202	32.2169
RMGESDDSILR	40S ribosomal protein S21 OS=Mus musculus OX=10090 GN=Rps21 PE=1 SV=1	Rps21	23046827	11	7.36261	1160	73.14		KHFELGGDKK	60S ribosomal protein L36a OS=Mus musculus OX=10090 GN=Rpl36a PE=3 SV=2	Rpl36a	7404532	10	6.8695	201	32.0574
VGPKFRGV	Protein AAR2 homolog OS=Mus musculus OX=10090 GN=Aar2 PE=1 SV=3	Aar2	23044302	8	7.36256	1159	73.0769		EPSRYLSI	Ubiquitin carboxyl-terminal hydrolase 26 OS=Mus musculus OX=10090 GN=Usp26 PE=1 SV=2	Usp26	7396861	8	6.86905	200	31.8979
VQLTVREAINQ	Pyruvate dehydrogenase E1 component subunit beta, mitochondrial OS=Mus musculus OX=10090 GN=Pdhb PE=1 SV=1	Pdhb	23027866	11	7.36225	1158	73.0139		KDVKFGADARAL	60 kDa heat shock protein, mitochondrial OS=Mus musculus OX=10090 GN=Hspd1 PE=1 SV=1	Hspd1	7.3717e+06	12	6.86757	199	31.7384
TGKDISTNYY	Endoplasmin OS=Mus musculus OX=10090 GN=Hsp90b1 PE=1 SV=2	Hsp90b1	22975594	10	7.36127	1157	72.9508		RGNGLIKVNGRP	40S ribosomal protein S16 OS=Mus musculus OX=10090 GN=Rps16 PE=1 SV=4	Rps16	7.35602e+06	12	6.86664	198	31.5789
KFLPSELRDEH	Talin-1 OS=Mus musculus OX=10090 GN=Tln1 PE=1 SV=2	Tln1	22890174	11	7.35965	1156	72.8878		ELPIQSAIT	Sulfite oxidase, mitochondrial OS=Mus musculus OX=10090 GN=Suox PE=1 SV=2	Suox	7263745	9	6.86116	197	31.4195
NSILTTHTTLE	Tubulin alpha-8 chain OS=Mus musculus OX=10090 GN=Tuba8 PE=1 SV=1;Tubulin alpha-1A chain OS=Mus musculus OX=10090 GN=Tuba1a PE=1 SV=1;Tubulin alpha-1C chain OS=Mus musculus OX=10090 GN=Tuba1c PE=1 SV=1	Tuba8	22877216	11	7.3594	1155	72.8247		SGVSNPHVI	YEATS domain-containing protein 2 OS=Mus musculus OX=10090 GN=Yeats2 PE=1 SV=2	Yeats2	7.23376e+06	9	6.85936	196	31.26
VQLENQMVL	Copper chaperone for superoxide dismutase OS=Mus musculus OX=10090 GN=Ccs PE=1 SV=1	Ccs	22821832	9	7.35835	1154	72.7617		SAALNKDFL	Centrosome-associated protein 350 OS=Mus musculus OX=10090 GN=Cep350 PE=1 SV=1	Cep350	7204752	9	6.85762	195	31.1005
KIREEYPDRIM	Tubulin beta-5 chain OS=Mus musculus OX=10090 GN=Tubb5 PE=1 SV=1;Tubulin beta-4B chain OS=Mus musculus OX=10090 GN=Tubb4b PE=1 SV=1;Tubulin beta-6 chain OS=Mus musculus OX=10090 GN=Tubb6 PE=1 SV=1	Tubb5	22763812	11	7.35724	1153	72.6986		GGSGGSGGYGGR	Heterogeneous nuclear ribonucleoproteins A2/B1 OS=Mus musculus OX=10090 GN=Hnrnpa2b1 PE=1 SV=2	Hnrnpa2b1	7171023	12	6.85558	194	30.941
LADMLLGLLVLP	Trace amine-associated receptor 5 OS=Mus musculus OX=10090 GN=Taar5 PE=2 SV=1	Taar5	22694774	12	7.35593	1152	72.6356		YAADNQIYI	Heterogeneous nuclear ribonucleoprotein L OS=Mus musculus OX=10090 GN=Hnrnpl PE=1 SV=2	Hnrnpl	7.13877e+06	9	6.85362	193	30.7815
IGITNHDEYSL	Talin-1 OS=Mus musculus OX=10090 GN=Tln1 PE=1 SV=2	Tln1	22616730	11	7.35443	1151	72.5725		SSYSFRHL	Lysosomal thioesterase PPT2 OS=Mus musculus OX=10090 GN=Ppt2 PE=1 SV=1	Ppt2	7080724	8	6.85008	192	30.622
KARVITEEEKNF	60S ribosomal protein L13 OS=Mus musculus OX=10090 GN=Rpl13 PE=1 SV=3	Rpl13	22530828	12	7.35278	1150	72.5095		SSLSEACHT	Protein NPAT OS=Mus musculus OX=10090 GN=Npat PE=1 SV=2	Npat	7042087	9	6.8477	191	30.4625
IQAENAEFM	Heme oxygenase 1 OS=Mus musculus OX=10090 GN=Hmox1 PE=1 SV=1	Hmox1	22514088	9	7.35245	1149	72.4464		ADGIVSKNF	40S ribosomal protein S21 OS=Mus musculus OX=10090 GN=Rps21 PE=1 SV=1	Rps21	7.04019e+06	9	6.84758	190	30.303
SGKKLEDGPKFL	Elongation factor 1-alpha 1 OS=Mus musculus OX=10090 GN=Eef1a1 PE=1 SV=3	Eef1a1	22431866	12	7.35087	1148	72.3834		SALENGRYEL	Bromodomain adjacent to zinc finger domain protein 1A OS=Mus musculus OX=10090 GN=Baz1a PE=1 SV=3	Baz1a	7016496	10	6.84612	189	30.1435
IAFSCPVFT	Solute carrier family 35 member G1 OS=Mus musculus OX=10090 GN=Slc35g1 PE=2 SV=1	Slc35g1	22426968	9	7.35077	1147	72.3203		SMPRALVSPL	G2 and S phase-expressed protein 1 OS=Mus musculus OX=10090 GN=Gtse1 PE=1 SV=2	Gtse1	7.01064e+06	10	6.84576	188	29.9841
VSFTYRYL	Vacuolar protein sorting-associated protein 16 homolog OS=Mus musculus OX=10090 GN=Vps16 PE=1 SV=3	Vps16	22406902	8	7.35038	1146	72.2573		GDRYDGMVGF	Heterogeneous nuclear ribonucleoprotein K OS=Mus musculus OX=10090 GN=Hnrnpk PE=1 SV=1	Hnrnpk	7010627	10	6.84576	187	29.8246
FSITDQQTL	Protein NLRC5 OS=Mus musculus OX=10090 GN=Nlrc5 PE=1 SV=2	Nlrc5	22391110	9	7.35008	1145	72.1942		FTDEESRVF	Bcl-2-associated transcription factor 1 OS=Mus musculus OX=10090 GN=Bclaf1 PE=1 SV=2	Bclaf1	6899048	9	6.83879	186	29.6651
YGIRNSLLI	Ribonucleoside-diphosphate reductase large subunit OS=Mus musculus OX=10090 GN=Rrm1 PE=1 SV=2	Rrm1	22345928	9	7.3492	1144	72.1311		SAIHNFYDNI	TGF-beta-activated kinase 1 and MAP3K7-binding protein 2 OS=Mus musculus OX=10090 GN=Tab2 PE=1 SV=1	Tab2	6856457	10	6.8361	185	29.5056
NMPWNVDTL	Hsp90 co-chaperone Cdc37 OS=Mus musculus OX=10090 GN=Cdc37 PE=1 SV=1	Cdc37	22336490	9	7.34901	1143	72.0681		SSVQNKEYL	Zinc finger protein 518B OS=Mus musculus OX=10090 GN=Znf518b PE=2 SV=1	Znf518b	6795087	9	6.8322	184	29.3461
YGIENEVFL	L-lactate dehydrogenase B chain OS=Mus musculus OX=10090 GN=Ldhb PE=1 SV=2	Ldhb	22316330	9	7.34862	1142	72.005		RTKKNKEEAAEY	40S ribosomal protein S6 OS=Mus musculus OX=10090 GN=Rps6 PE=1 SV=1	Rps6	6783922	12	6.83148	183	29.1866
KDVKFGADARAL	60 kDa heat shock protein, mitochondrial OS=Mus musculus OX=10090 GN=Hspd1 PE=1 SV=1	Hspd1	22303638	12	7.34838	1141	71.942		LSADTSLSSS	Mitochondrial antiviral-signaling protein OS=Mus musculus OX=10090 GN=Mavs PE=1 SV=1	Mavs	6.76887e+06	10	6.83052	182	29.0271
RVVDLITNL	E3 ubiquitin-protein ligase HUWE1 OS=Mus musculus OX=10090 GN=Huwe1 PE=1 SV=5	Huwe1	22122782	9	7.34484	1140	71.8789		AAVQNPALTAL	Sterol regulatory element-binding protein 2 OS=Mus musculus OX=10090 GN=Srebf2 PE=1 SV=2	Srebf2	6.70005e+06	11	6.82608	181	28.8676
MGPLGLDHM	Heterogeneous nuclear ribonucleoprotein M OS=Mus musculus OX=10090 GN=Hnrnpm PE=1 SV=3	Hnrnpm	22010764	9	7.34264	1139	71.8159		TSVVFNKL	DNA-directed RNA polymerase I subunit RPA12 OS=Mus musculus OX=10090 GN=Polr1h PE=1 SV=1	Polr1h	6.68658e+06	8	6.8252	180	28.7081
GQTVQVQGVI	cAMP-responsive element modulator OS=Mus musculus OX=10090 GN=Crem PE=1 SV=2	Crem	21958856	10	7.34161	1138	71.7528		PVEKALRD	Heat shock cognate 71 kDa protein OS=Mus musculus OX=10090 GN=Hspa8 PE=1 SV=1	Hspa8	6.59652e+06	8	6.81932	179	28.5486
ADGIVSKNF	40S ribosomal protein S21 OS=Mus musculus OX=10090 GN=Rps21 PE=1 SV=1	Rps21	21912038	9	7.34068	1137	71.6898		SFSKAFGQ	Nucleolar RNA helicase 2 OS=Mus musculus OX=10090 GN=Ddx21 PE=1 SV=3	Ddx21	6.5327e+06	8	6.81509	178	28.3892
LLHGKYVKEQ	MICOS complex subunit Mic10 OS=Mus musculus OX=10090 GN=Micos10 PE=1 SV=1	Micos10	21751744	10	7.33749	1136	71.6267		QEYDESGPSIVH	Actin, cytoplasmic 1 OS=Mus musculus OX=10090 GN=Actb PE=1 SV=1	Actb	6504863	12	6.81324	177	28.2297
VQVPNLESL	Chromodomain-helicase-DNA-binding protein 8 OS=Mus musculus OX=10090 GN=Chd8 PE=1 SV=1	Chd8	21715894	9	7.33678	1135	71.5637		GLSTCYMATL	Vomeronasal type-1 receptor 52 OS=Mus musculus OX=10090 GN=Vmn1r52 PE=3 SV=1	Vmn1r52	6473118	10	6.81111	176	28.0702
KLAVNMVP	Tubulin beta-3 chain OS=Mus musculus OX=10090 GN=Tubb3 PE=1 SV=1;Tubulin beta-5 chain OS=Mus musculus OX=10090 GN=Tubb5 PE=1 SV=1;Tubulin beta-4B chain OS=Mus musculus OX=10090 GN=Tubb4b PE=1 SV=1;Tubulin beta-6 chain OS=Mus musculus OX=10090 GN=Tubb6 PE=1 SV=1	Tubb3	21476176	8	7.33196	1134	71.5006		VAVTFSERL	Cystine/glutamate transporter OS=Mus musculus OX=10090 GN=Slc7a11 PE=1 SV=1	Slc7a11	6.45786e+06	9	6.81009	175	27.9107
GFQNAILVRYT	Albumin OS=Mus musculus OX=10090 GN=Alb PE=1 SV=3	Alb	21466120	11	7.33175	1133	71.4376		YIKSTMGK	60S ribosomal protein L10a OS=Mus musculus OX=10090 GN=Rpl10a PE=1 SV=3	Rpl10a	6434486	8	6.80851	174	27.7512
DMEEGVVNEILQ	Tubulin epsilon chain OS=Mus musculus OX=10090 GN=Tube1 PE=1 SV=1	Tube1	21388994	12	7.33019	1132	71.3745		DRYDGMVGF	Heterogeneous nuclear ribonucleoprotein K OS=Mus musculus OX=10090 GN=Hnrnpk PE=1 SV=1	Hnrnpk	6.42894e+06	9	6.80814	173	27.5917
SKGLVEKLTTY	Trifunctional enzyme subunit alpha, mitochondrial OS=Mus musculus OX=10090 GN=Hadha PE=1 SV=1	Hadha	21372898	11	7.32986	1131	71.3115		RMLENYEEI	Cullin-7 OS=Mus musculus OX=10090 GN=Cul7 PE=1 SV=2	Cul7	6421808	9	6.80766	172	27.4322
PRKIEEIKDFLL	60S ribosomal protein L38 OS=Mus musculus OX=10090 GN=Rpl38 PE=1 SV=3	Rpl38	21323000	12	7.32885	1130	71.2484		ASYLFRGL	Transmembrane channel-like protein 6 OS=Mus musculus OX=10090 GN=Tmc6 PE=1 SV=2	Tmc6	6414444	8	6.80716	171	27.2727
ALPMTALR	Leucine-rich repeat transmembrane protein FLRT3 OS=Mus musculus OX=10090 GN=Flrt3 PE=1 SV=1	Flrt3	21308188	8	7.32855	1129	71.1854		NTHENLTYL	Epiplakin OS=Mus musculus OX=10090 GN=Eppk1 PE=1 SV=2;Plectin OS=Mus musculus OX=10090 GN=Plec PE=1 SV=3	Eppk1	6.41392e+06	9	6.80712	170	27.1132
KEPELLEPIPY	60S ribosomal protein L21 OS=Mus musculus OX=10090 GN=Rpl21 PE=1 SV=3	Rpl21	21242936	11	7.32721	1128	71.1223		SRAKRRWAP	Desmocollin-2 OS=Mus musculus OX=10090 GN=Dsc2 PE=1 SV=1	Dsc2	6396234	9	6.80592	169	26.9537
KSLENILTL	F-box DNA helicase 1 OS=Mus musculus OX=10090 GN=Fbh1 PE=1 SV=1	Fbh1	21209102	9	7.32652	1127	71.0593		DAVKNGDYI	M-phase phosphoprotein 8 OS=Mus musculus OX=10090 GN=Mphosph8 PE=1 SV=1	Mphosph8	6.30927e+06	9	6.79998	168	26.7943
AKADGIVSKNF	40S ribosomal protein S21 OS=Mus musculus OX=10090 GN=Rps21 PE=1 SV=1	Rps21	21207517	11	7.32649	1126	70.9962		KIQSFINRM	Vacuolar fusion protein CCZ1 homolog OS=Mus musculus OX=10090 GN=Ccz1 PE=1 SV=1	Ccz1	6.28734e+06	9	6.79847	167	26.6348
KKPAGATP	Histone H1.5 OS=Mus musculus OX=10090 GN=H1-5 PE=1 SV=2	H1-5	21197036	8	7.32628	1125	70.9332		KGHAVGDIPGVR	40S ribosomal protein S23 OS=Mus musculus OX=10090 GN=Rps23 PE=1 SV=3	Rps23	6274187	12	6.79756	166	26.4753
GIVGKYGTRY	60S ribosomal protein L37a OS=Mus musculus OX=10090 GN=Rpl37a PE=1 SV=2	Rpl37a	2.1119e+07	10	7.32467	1124	70.8701		KGKLPKQPVIVK	60S ribosomal protein L27a OS=Mus musculus OX=10090 GN=Rpl27a PE=1 SV=5	Rpl27a	6.26661e+06	12	6.79703	165	26.3158
ILGGDLHLSV	Valine--tRNA ligase, mitochondrial OS=Mus musculus OX=10090 GN=Vars2 PE=1 SV=2	Vars2	21106880	10	7.32442	1123	70.8071		SSLHSPRPS	Taste receptor cell protein 1 OS=Mus musculus OX=10090 GN=Trcg1 PE=2 SV=1	Trcg1	6262612	9	6.79676	164	26.1563
VSLLDIDHL	HEAT repeat-containing protein 3 OS=Mus musculus OX=10090 GN=Heatr3 PE=1 SV=1	Heatr3	21086954	9	7.32401	1122	70.744		VDQASFSS	BRD4-interacting chromatin-remodeling complex-associated protein OS=Mus musculus OX=10090 GN=Bicra PE=1 SV=1	Bicra	6.25652e+06	8	6.79633	163	25.9968
SPAGQRLR	Leukotriene B4 receptor 1 OS=Mus musculus OX=10090 GN=Ltb4r PE=2 SV=1	Ltb4r	21070718	8	7.32368	1121	70.681		VAYWRQAGL	ATP synthase subunit epsilon, mitochondrial OS=Mus musculus OX=10090 GN=Atp5f1e PE=1 SV=2	Atp5f1e	6.24699e+06	9	6.79567	162	25.8373
KIQSFINRM	Vacuolar fusion protein CCZ1 homolog OS=Mus musculus OX=10090 GN=Ccz1 PE=1 SV=1	Ccz1	21069013	9	7.32364	1120	70.6179		RLQDGQTF	Monofunctional C1-tetrahydrofolate synthase, mitochondrial OS=Mus musculus OX=10090 GN=Mthfd1l PE=1 SV=2	Mthfd1l	6.24183e+06	8	6.79531	161	25.6778
TGIRNLEWL	Transmembrane protein 260 OS=Mus musculus OX=10090 GN=Tmem260 PE=2 SV=2	Tmem260	20963420	9	7.32146	1119	70.5549		AAVIDQERL	Serine/threonine-protein kinase MRCK gamma OS=Mus musculus OX=10090 GN=Cdc42bpg PE=1 SV=2	Cdc42bpg	6.19331e+06	9	6.79192	160	25.5183
GAVTNVKVI	ELAV-like protein 3 OS=Mus musculus OX=10090 GN=Elavl3 PE=1 SV=1	Elavl3	20860394	9	7.31932	1118	70.4918		SSLPNGDVAG	SH3 domain-binding glutamic acid-rich protein OS=Mus musculus OX=10090 GN=Sh3bgr PE=1 SV=1	Sh3bgr	6.17671e+06	10	6.79076	159	25.3589
RSSVPGVR	Vimentin OS=Mus musculus OX=10090 GN=Vim PE=1 SV=3	Vim	20765538	8	7.31734	1117	70.4288		YIGIVKQAGLD	Heterogeneous nuclear ribonucleoprotein F OS=Mus musculus OX=10090 GN=Hnrnpf PE=1 SV=3	Hnrnpf	6.17038e+06	11	6.79031	158	25.1994
FGGGKTTGF	40S ribosomal protein S24 OS=Mus musculus OX=10090 GN=Rps24 PE=1 SV=1	Rps24	20743094	9	7.31687	1116	70.3657		SNVVNQANL	Protein NDRG4 OS=Mus musculus OX=10090 GN=Ndrg4 PE=1 SV=1	Ndrg4	6165679	9	6.78998	157	25.0399
FIDTTSKFGHG	60S ribosomal protein L3 OS=Mus musculus OX=10090 GN=Rpl3 PE=1 SV=3	Rpl3	20730938	11	7.31662	1115	70.3026		ASIIDMGEE	Calcium-dependent secretion activator 1 OS=Mus musculus OX=10090 GN=Cadps PE=1 SV=3	Cadps	6.14462e+06	9	6.7885	156	24.8804
RAFSMDDRIAW	Toll-interacting protein OS=Mus musculus OX=10090 GN=Tollip PE=1 SV=1	Tollip	20686036	11	7.31568	1114	70.2396		YGFQNAILVR	Albumin OS=Mus musculus OX=10090 GN=Alb PE=1 SV=3	Alb	6.13049e+06	10	6.7875	155	24.7209
SNLLKRDFGA	Probable ATP-dependent RNA helicase DDX5 OS=Mus musculus OX=10090 GN=Ddx5 PE=1 SV=2	Ddx5	20663514	10	7.3152	1113	70.1765		RQFLNRDDI	V-type proton ATPase subunit F OS=Mus musculus OX=10090 GN=Atp6v1f PE=1 SV=2	Atp6v1f	6.08794e+06	9	6.78447	154	24.5614
ASHLNLDAL	E3 ubiquitin-protein ligase TRIM32 OS=Mus musculus OX=10090 GN=Trim32 PE=1 SV=2	Trim32	20663004	9	7.31519	1112	70.1135		MGPLGLDHM	Heterogeneous nuclear ribonucleoprotein M OS=Mus musculus OX=10090 GN=Hnrnpm PE=1 SV=3	Hnrnpm	6071213	9	6.78328	153	24.4019
TGVTNRDLI	Rho GTPase-activating protein 21 OS=Mus musculus OX=10090 GN=Arhgap21 PE=1 SV=1	Arhgap21	20572806	9	7.31329	1111	70.0504		KVLVFSQM	Lymphocyte-specific helicase OS=Mus musculus OX=10090 GN=Hells PE=1 SV=2	Hells	6.05659e+06	8	6.78223	152	24.2424
FQNVNSVTL	Thioredoxin-like protein 1 OS=Mus musculus OX=10090 GN=Txnl1 PE=1 SV=3	Txnl1	20560896	9	7.31304	1110	69.9874		TSARATTEA	Carbonic anhydrase 14 OS=Mus musculus OX=10090 GN=Ca14 PE=1 SV=1	Ca14	6020051	9	6.7796	151	24.0829
SQVINPTAI	Host cell factor 1 OS=Mus musculus OX=10090 GN=Hcfc1 PE=1 SV=2	Hcfc1	20528758	9	7.31236	1109	69.9243		FLDQSFVPIT	Sia-alpha-2,3-Gal-beta-1,4-GlcNAc-R:alpha 2,8-sialyltransferase OS=Mus musculus OX=10090 GN=St8sia3 PE=1 SV=2	St8sia3	6018969	10	6.77952	150	23.9234
NAGVEGSLIVEK	60 kDa heat shock protein, mitochondrial OS=Mus musculus OX=10090 GN=Hspd1 PE=1 SV=1	Hspd1	20470746	12	7.31113	1108	69.8613		KIKIIAPPERKY	Actin, cytoplasmic 1 OS=Mus musculus OX=10090 GN=Actb PE=1 SV=1	Actb	6002714	12	6.77835	149	23.764
KKAKTTKKIVL	60S ribosomal protein L36a OS=Mus musculus OX=10090 GN=Rpl36a PE=3 SV=2	Rpl36a	20419050	11	7.31004	1107	69.7982		FSDYPPLGR	Elongation factor 1-alpha 1 OS=Mus musculus OX=10090 GN=Eef1a1 PE=1 SV=3	Eef1a1	5988117	9	6.77729	148	23.6045
VNAAIATIK	Tubulin alpha-1A chain OS=Mus musculus OX=10090 GN=Tuba1a PE=1 SV=1;Tubulin alpha-1C chain OS=Mus musculus OX=10090 GN=Tuba1c PE=1 SV=1	Tuba1a	20408964	9	7.30982	1106	69.7352		ITPLNKDHI	Nuclear pore complex protein Nup155 OS=Mus musculus OX=10090 GN=Nup155 PE=1 SV=1	Nup155	5961231	9	6.77534	147	23.445
SGLLNQQSL	Mediator of RNA polymerase II transcription subunit 27 OS=Mus musculus OX=10090 GN=Med27 PE=2 SV=2	Med27	20385556	9	7.30932	1105	69.6721		TGGLLFMYV	E3 ubiquitin-protein ligase MARCHF8 OS=Mus musculus OX=10090 GN=Marchf8 PE=2 SV=1	Marchf8	5.94818e+06	9	6.77438	146	23.2855
DRYDGMVGF	Heterogeneous nuclear ribonucleoprotein K OS=Mus musculus OX=10090 GN=Hnrnpk PE=1 SV=1	Hnrnpk	20332992	9	7.3082	1104	69.6091		VNDIFERI	Histone H2B type 3-B OS=Mus musculus OX=10090 GN=H2bu1 PE=1 SV=3;Histone H2B type 1-F/J/L OS=Mus musculus OX=10090 GN=H2bc7 PE=1 SV=2	H2bu1	5932948	8	6.77327	145	23.126
YMGPSQRPL	Transcription factor SOX-10 OS=Mus musculus OX=10090 GN=Sox10 PE=1 SV=2	Sox10	20279330	9	7.30705	1103	69.546		NSMVLFDHM	DNA topoisomerase 2-beta OS=Mus musculus OX=10090 GN=Top2b PE=1 SV=2	Top2b	5.9127e+06	9	6.77179	144	22.9665
ARVITEEEKNF	60S ribosomal protein L13 OS=Mus musculus OX=10090 GN=Rpl13 PE=1 SV=3	Rpl13	20261659	11	7.30668	1102	69.483		TELNYKNTEPVL	Ig gamma-2A chain C region, membrane-bound form OS=Mus musculus OX=10090 GN=Igh-1a PE=1 SV=3	Igh-1a	5884712	12	6.76973	143	22.807
RQFLNRDDI	V-type proton ATPase subunit F OS=Mus musculus OX=10090 GN=Atp6v1f PE=1 SV=2	Atp6v1f	20224760	9	7.30588	1101	69.4199		ATLNNMRV	Solute carrier family 12 member 4 OS=Mus musculus OX=10090 GN=Slc12a4 PE=1 SV=2	Slc12a4	5709560	8	6.7566	142	22.6475
AVFARVAF	DNA-binding protein SATB2 OS=Mus musculus OX=10090 GN=Satb2 PE=1 SV=1	Satb2	20209860	8	7.30556	1100	69.3569		GSVTHVTTF	Smoothelin OS=Mus musculus OX=10090 GN=Smtn PE=1 SV=2	Smtn	5615220	9	6.74937	141	22.488
RLQDGQTF	Monofunctional C1-tetrahydrofolate synthase, mitochondrial OS=Mus musculus OX=10090 GN=Mthfd1l PE=1 SV=2	Mthfd1l	20164038	8	7.30458	1099	69.2938		LIEVDDER	40S ribosomal protein S6 OS=Mus musculus OX=10090 GN=Rps6 PE=1 SV=1	Rps6	5.60365e+06	8	6.74847	140	22.3285
RAIPNNQVL	Endothelial differentiation-related factor 1 OS=Mus musculus OX=10090 GN=Edf1 PE=1 SV=1	Edf1	20154458	9	7.30437	1098	69.2308		TNPSFDGRL	Atlastin-2 OS=Mus musculus OX=10090 GN=Atl2 PE=1 SV=1	Atl2	5490607	9	6.73962	139	22.1691
VLLQQSSLSEIN	Ankyrin repeat domain-containing protein 55 OS=Mus musculus OX=10090 GN=Ankrd55 PE=1 SV=2	Ankrd55	20070424	12	7.30256	1097	69.1677		GVRLTELLKQGQ	ATP synthase subunit alpha, mitochondrial OS=Mus musculus OX=10090 GN=Atp5f1a PE=1 SV=1	Atp5f1a	5468127	12	6.73784	138	22.0096
VFLINCAT	Transmembrane protein 132C OS=Mus musculus OX=10090 GN=Tmem132c PE=2 SV=3	Tmem132c	19992718	8	7.30087	1096	69.1047		VVYIYKEHF	Small subunit processome component 20 homolog OS=Mus musculus OX=10090 GN=Utp20 PE=1 SV=2	Utp20	5463549	9	6.73747	137	21.8501
GNFGGRSSGP	Heterogeneous nuclear ribonucleoprotein A1 OS=Mus musculus OX=10090 GN=Hnrnpa1 PE=1 SV=2	Hnrnpa1	19897674	10	7.2988	1095	69.0416		RLMVHTVATF	Spectrin alpha chain, non-erythrocytic 1 OS=Mus musculus OX=10090 GN=Sptan1 PE=1 SV=4	Sptan1	5439531	10	6.73556	136	21.6906
FSDYPPLGR	Elongation factor 1-alpha 1 OS=Mus musculus OX=10090 GN=Eef1a1 PE=1 SV=3	Eef1a1	19886442	9	7.29856	1094	68.9786		FIDTTSKFGHG	60S ribosomal protein L3 OS=Mus musculus OX=10090 GN=Rpl3 PE=1 SV=3	Rpl3	5429005	11	6.73472	135	21.5311
SMYVPGKL	Prefoldin subunit 5 OS=Mus musculus OX=10090 GN=Pfdn5 PE=1 SV=1	Pfdn5	19815450	8	7.297	1093	68.9155		RALKNFSSL	Ral guanine nucleotide dissociation stimulator OS=Mus musculus OX=10090 GN=Ralgds PE=1 SV=2	Ralgds	5424560	9	6.73436	134	21.3716
SSYKFNHL	Protein farnesyltransferase subunit beta OS=Mus musculus OX=10090 GN=Fntb PE=1 SV=1	Fntb	19713508	8	7.29476	1092	68.8525		GLQFPVGRVH	Histone H2A type 1-B OS=Mus musculus OX=10090 GN=H2ac4 PE=1 SV=1	H2ac4	5424405	10	6.73435	133	21.2121
TALEHQEYI	Complement component 1 Q subcomponent-binding protein, mitochondrial OS=Mus musculus OX=10090 GN=C1qbp PE=1 SV=1	C1qbp	19676244	9	7.29394	1091	68.7894		TSFMFQRV	Annexin A4 OS=Mus musculus OX=10090 GN=Anxa4 PE=1 SV=4	Anxa4	5.4093e+06	8	6.73314	132	21.0526
SKLEFSIYPAPQ	Tubulin alpha-1A chain OS=Mus musculus OX=10090 GN=Tuba1a PE=1 SV=1;Tubulin alpha-1C chain OS=Mus musculus OX=10090 GN=Tuba1c PE=1 SV=1	Tuba1a	19623654	12	7.29278	1090	68.7264		NAPQNPESKL	GON-4-like protein OS=Mus musculus OX=10090 GN=Gon4l PE=1 SV=3	Gon4l	5370515	10	6.73002	131	20.8931
SSLESSFTL	Dedicator of cytokinesis protein 11 OS=Mus musculus OX=10090 GN=Dock11 PE=1 SV=1	Dock11	19621410	9	7.29273	1089	68.6633		NEITKIMST	Cytochrome P450 2C50 OS=Mus musculus OX=10090 GN=Cyp2c50 PE=1 SV=2	Cyp2c50	5363744	9	6.72947	130	20.7337
RAPTGYDVV	Multivesicular body subunit 12B OS=Mus musculus OX=10090 GN=Mvb12b PE=1 SV=2	Mvb12b	19592180	9	7.29208	1088	68.6003		VALENANAV	Nucleolar protein 56 OS=Mus musculus OX=10090 GN=Nop56 PE=1 SV=2	Nop56	5307562	9	6.7249	129	20.5742
GALKNLSVIYI	E3 ISG15--protein ligase Herc6 OS=Mus musculus OX=10090 GN=Herc6 PE=2 SV=1	Herc6	19496916	11	7.28997	1087	68.5372		YMGPSQRPL	Transcription factor SOX-10 OS=Mus musculus OX=10090 GN=Sox10 PE=1 SV=2	Sox10	5.28141e+06	9	6.72275	128	20.4147
GDAAIVDMVP	Elongation factor 1-alpha 1 OS=Mus musculus OX=10090 GN=Eef1a1 PE=1 SV=3	Eef1a1	19462296	10	7.28919	1086	68.4741		KLEDGPKFL	Elongation factor 1-alpha 1 OS=Mus musculus OX=10090 GN=Eef1a1 PE=1 SV=3	Eef1a1	5249169	9	6.72009	127	20.2552
GREIDVRIDRNA	Myelin expression factor 2 OS=Mus musculus OX=10090 GN=Myef2 PE=1 SV=1;Heterogeneous nuclear ribonucleoprotein M OS=Mus musculus OX=10090 GN=Hnrnpm PE=1 SV=3	Myef2	19361615	12	7.28694	1085	68.4111		AVFLTIVIMV	Sodium bicarbonate cotransporter 3 OS=Mus musculus OX=10090 GN=Slc4a7 PE=1 SV=2	Slc4a7	5.22353e+06	10	6.71796	126	20.0957
AGPENSSKI	Autophagy-related protein 2 homolog B OS=Mus musculus OX=10090 GN=Atg2b PE=1 SV=3	Atg2b	19351978	9	7.28673	1084	68.348		VAISPGKHYL	Protein mono-ADP-ribosyltransferase PARP14 OS=Mus musculus OX=10090 GN=Parp14 PE=1 SV=3	Parp14	5.20986e+06	10	6.71683	125	19.9362
ATIRVTNL	Eukaryotic translation initiation factor 3 subunit G OS=Mus musculus OX=10090 GN=Eif3g PE=1 SV=2	Eif3g	19335422	8	7.28635	1083	68.285		AMSSIALAA	Voltage-dependent P/Q-type calcium channel subunit alpha-1A OS=Mus musculus OX=10090 GN=Cacna1a PE=1 SV=2	Cacna1a	5202824	9	6.71624	124	19.7767
FLPTAGKGTTP	Protein FAM205A-2 OS=Mus musculus OX=10090 GN=Fam205a2 PE=3 SV=1	Fam205a2	19248598	11	7.2844	1082	68.2219		FLDTALAFP	Protein dopey-2 OS=Mus musculus OX=10090 GN=Dop1b PE=1 SV=3	Dop1b	5.157e+06	9	6.7124	123	19.6172
TGFKVGIN	Tubulin alpha-8 chain OS=Mus musculus OX=10090 GN=Tuba8 PE=1 SV=1;Tubulin alpha chain-like 3 OS=Mus musculus OX=10090 GN=Tubal3 PE=2 SV=2;Tubulin alpha-1A chain OS=Mus musculus OX=10090 GN=Tuba1a PE=1 SV=1;Tubulin alpha-1C chain OS=Mus musculus OX=10090 GN=Tuba1c PE=1 SV=1	Tuba8	19176192	8	7.28276	1081	68.1589		GLQFPVGR	Histone H2A type 1-B OS=Mus musculus OX=10090 GN=H2ac4 PE=1 SV=1;Histone H2A.Z OS=Mus musculus OX=10090 GN=H2az1 PE=1 SV=2	H2ac4	5142010	8	6.71113	122	19.4577
AKDIGFIKLD	40S ribosomal protein S29 OS=Mus musculus OX=10090 GN=Rps29 PE=1 SV=2	Rps29	19077554	10	7.28052	1080	68.0958		RSFRNPLAK	Alpha-enolase OS=Mus musculus OX=10090 GN=Eno1 PE=1 SV=3	Eno1	5129046	9	6.71004	121	19.2982
EQHVGIDVL	Probable phospholipid-transporting ATPase IH OS=Mus musculus OX=10090 GN=Atp11a PE=1 SV=1	Atp11a	19068850	9	7.28032	1079	68.0328		DVQLQESGP	Ig heavy chain V region MOPC 315 OS=Mus musculus OX=10090 PE=1 SV=2	?	5125667	9	6.70975	120	19.1388
AYFHEEDETSF	Eukaryotic translation initiation factor 3 subunit D OS=Mus musculus OX=10090 GN=Eif3d PE=1 SV=2	Eif3d	19035052	11	7.27955	1078	67.9697		QIFRPDNF	Tubulin beta-5 chain OS=Mus musculus OX=10090 GN=Tubb5 PE=1 SV=1;Tubulin beta-4B chain OS=Mus musculus OX=10090 GN=Tubb4b PE=1 SV=1	Tubb5	5.1224e+06	8	6.70947	119	18.9793
ELWEEEFI	Polyadenylate-binding protein-interacting protein 2 OS=Mus musculus OX=10090 GN=Paip2 PE=1 SV=1	Paip2	19001882	8	7.2788	1077	67.9067		ASVQNEAKL	Coronin-1C OS=Mus musculus OX=10090 GN=Coro1c PE=1 SV=2	Coro1c	5.09594e+06	9	6.70722	118	18.8198
VIAELVNV	General transcription factor IIH subunit 5 OS=Mus musculus OX=10090 GN=Gtf2h5 PE=1 SV=1	Gtf2h5	18945406	8	7.2775	1076	67.8436		DAREAIIP	Regulator of nonsense transcripts 1 OS=Mus musculus OX=10090 GN=Upf1 PE=1 SV=2	Upf1	5094313	8	6.70709	117	18.6603
VALLNKTNV	Catenin beta-1 OS=Mus musculus OX=10090 GN=Ctnnb1 PE=1 SV=1	Ctnnb1	18810844	9	7.27441	1075	67.7806		SRHPPENGKP	Beta-2-microglobulin OS=Mus musculus OX=10090 GN=B2m PE=1 SV=2	B2m	5087605	10	6.70651	116	18.5008
EVFDFRGM	Nck-associated protein 1 OS=Mus musculus OX=10090 GN=Nckap1 PE=1 SV=2	Nckap1	18741044	8	7.27279	1074	67.7175		APLQGYVTHLL	FRAS1-related extracellular matrix protein 1 OS=Mus musculus OX=10090 GN=Frem1 PE=1 SV=1	Frem1	5.0847e+06	11	6.70627	115	18.3413
FHPEQLITG	Tubulin alpha-8 chain OS=Mus musculus OX=10090 GN=Tuba8 PE=1 SV=1;Tubulin alpha-1A chain OS=Mus musculus OX=10090 GN=Tuba1a PE=1 SV=1;Tubulin alpha-1C chain OS=Mus musculus OX=10090 GN=Tuba1c PE=1 SV=1	Tuba8	18608006	9	7.2697	1073	67.6545		KRLTKGGKKG	40S ribosomal protein S3a OS=Mus musculus OX=10090 GN=Rps3a PE=1 SV=3	Rps3a	5.04654e+06	10	6.70299	114	18.1818
GDRYDGMVGF	Heterogeneous nuclear ribonucleoprotein K OS=Mus musculus OX=10090 GN=Hnrnpk PE=1 SV=1	Hnrnpk	18528402	10	7.26784	1072	67.5914		ITPPGYSHV	Lethal(3)malignant brain tumor-like protein 3 OS=Mus musculus OX=10090 GN=L3mbtl3 PE=1 SV=1	L3mbtl3	5038845	9	6.70233	113	18.0223
TIAPALVSK	Alpha-enolase OS=Mus musculus OX=10090 GN=Eno1 PE=1 SV=3	Eno1	18487756	9	7.26688	1071	67.5284		ANFSFRNTL	Tyrosinase OS=Mus musculus OX=10090 GN=Tyr PE=1 SV=3	Tyr	4998531	9	6.69884	112	17.8628
KVFEYHNV	Amyloid protein-binding protein 2 OS=Mus musculus OX=10090 GN=Appbp2 PE=2 SV=1	Appbp2	18476958	8	7.26663	1070	67.4653		YSPTLFAQT	Ubiquitin conjugation factor E4 A OS=Mus musculus OX=10090 GN=Ube4a PE=1 SV=1	Ube4a	4998060	9	6.6988	111	17.7033
PASTGAAKAVGK	Glyceraldehyde-3-phosphate dehydrogenase OS=Mus musculus OX=10090 GN=Gapdh PE=1 SV=2	Gapdh	18476453	12	7.26662	1069	67.4023		KIKIIAPP	Actin, cytoplasmic 1 OS=Mus musculus OX=10090 GN=Actb PE=1 SV=1	Actb	4927745	8	6.69265	110	17.5439
LLDLSPEEK	5,6-dihydroxyindole-2-carboxylic acid oxidase OS=Mus musculus OX=10090 GN=Tyrp1 PE=1 SV=1	Tyrp1	18455194	9	7.26612	1068	67.3392		RVLIFSQM	Chromodomain-helicase-DNA-binding protein 4 OS=Mus musculus OX=10090 GN=Chd4 PE=1 SV=1	Chd4	4.82659e+06	8	6.68364	109	17.3844
TSPEYQKL	Alsin OS=Mus musculus OX=10090 GN=Als2 PE=1 SV=3	Als2	18416774	8	7.26521	1067	67.2762		QTYDYRNI	Exosome complex component RRP45 OS=Mus musculus OX=10090 GN=Exosc9 PE=1 SV=1	Exosc9	4.82305e+06	8	6.68332	108	17.2249
RVMEYINRL	Clathrin heavy chain 1 OS=Mus musculus OX=10090 GN=Cltc PE=1 SV=3	Cltc	1.84097e+07	9	7.26505	1066	67.2131		KNLRYQLL	Matrin-3 OS=Mus musculus OX=10090 GN=Matr3 PE=1 SV=1	Matr3	4821342	8	6.68317	107	17.0654
SNRVVDLMAY	Glyceraldehyde-3-phosphate dehydrogenase OS=Mus musculus OX=10090 GN=Gapdh PE=1 SV=2	Gapdh	18408842	10	7.26503	1065	67.1501		TLRSEGFDTY	Proliferating cell nuclear antigen OS=Mus musculus OX=10090 GN=Pcna PE=1 SV=2	Pcna	4763634	10	6.67794	106	16.9059
SALNNFQVV	Syntaxin-12 OS=Mus musculus OX=10090 GN=Stx12 PE=1 SV=1	Stx12	18383404	9	7.26443	1064	67.087		ALGEEWKGY	40S ribosomal protein S6 OS=Mus musculus OX=10090 GN=Rps6 PE=1 SV=1	Rps6	4.76265e+06	9	6.67785	105	16.7464
TLVSEQTRVNA	60S ribosomal protein L27a OS=Mus musculus OX=10090 GN=Rpl27a PE=1 SV=5	Rpl27a	18346714	11	7.26356	1063	67.024		AGYTSFQIT	Dynein heavy chain 5, axonemal OS=Mus musculus OX=10090 GN=Dnah5 PE=1 SV=2	Dnah5	4.73086e+06	9	6.67494	104	16.5869
FKVAPEEFV	Glutamate receptor ionotropic, kainate 4 OS=Mus musculus OX=10090 GN=Grik4 PE=2 SV=2	Grik4	18318494	9	7.26289	1062	66.9609		ATHDLEGPPLDA	Poly(rC)-binding protein 1 OS=Mus musculus OX=10090 GN=Pcbp1 PE=1 SV=1	Pcbp1	4700679	12	6.67216	103	16.4274
VIPELNGKLTGM	Glyceraldehyde-3-phosphate dehydrogenase OS=Mus musculus OX=10090 GN=Gapdh PE=1 SV=2	Gapdh	18285308	12	7.2621	1061	66.8979		RVETGVLKP	Elongation factor 1-alpha 1 OS=Mus musculus OX=10090 GN=Eef1a1 PE=1 SV=3	Eef1a1	4698043	9	6.67192	102	16.2679
SSVSFADDFVR	Serpin H1 OS=Mus musculus OX=10090 GN=Serpinh1 PE=1 SV=3	Serpinh1	18272146	11	7.26179	1060	66.8348		QAPQNKITV	L-lactate dehydrogenase A chain OS=Mus musculus OX=10090 GN=Ldha PE=1 SV=3	Ldha	4673527	9	6.66964	101	16.1085
ISIPGKDP	Transmembrane glycoprotein NMB OS=Mus musculus OX=10090 GN=Gpnmb PE=1 SV=2	Gpnmb	18192988	8	7.2599	1059	66.7718		LLDLSPEEK	5,6-dihydroxyindole-2-carboxylic acid oxidase OS=Mus musculus OX=10090 GN=Tyrp1 PE=1 SV=1	Tyrp1	4.6609e+06	9	6.66847	100	15.949
ITPPGYSHV	Lethal(3)malignant brain tumor-like protein 3 OS=Mus musculus OX=10090 GN=L3mbtl3 PE=1 SV=1	L3mbtl3	18189832	9	7.25983	1058	66.7087		YVTTSTRTY	Vimentin OS=Mus musculus OX=10090 GN=Vim PE=1 SV=3	Vim	4634042	9	6.66596	99	15.7895
GVDPKFLRNM	60S ribosomal protein L29 OS=Mus musculus OX=10090 GN=Rpl29 PE=1 SV=2	Rpl29	18165376	10	7.25924	1057	66.6456		SVPSKELSPKVT	Breast cancer type 1 susceptibility protein homolog OS=Mus musculus OX=10090 GN=Brca1 PE=1 SV=3	Brca1	4601931	12	6.66294	98	15.63
RDVLGHEQYP	Transmembrane glycoprotein NMB OS=Mus musculus OX=10090 GN=Gpnmb PE=1 SV=2	Gpnmb	18143242	10	7.25871	1056	66.5826		LSADTSLSSSS	Mitochondrial antiviral-signaling protein OS=Mus musculus OX=10090 GN=Mavs PE=1 SV=1	Mavs	4.59576e+06	11	6.66236	97	15.4705
RRLTKHEEKLKT	60S ribosomal protein L35 OS=Mus musculus OX=10090 GN=Rpl35 PE=1 SV=1	Rpl35	18142254	12	7.25869	1055	66.5195		FGIGQDIQPK	60S ribosomal protein L7a OS=Mus musculus OX=10090 GN=Rpl7a PE=1 SV=2	Rpl7a	4585246	10	6.66136	96	15.311
SGPTYIKL	Uncharacterized aarF domain-containing protein kinase 2 OS=Mus musculus OX=10090 GN=Adck2 PE=2 SV=1	Adck2	18082164	8	7.25725	1054	66.4565		GSGGSGGYGGR	Heterogeneous nuclear ribonucleoproteins A2/B1 OS=Mus musculus OX=10090 GN=Hnrnpa2b1 PE=1 SV=2	Hnrnpa2b1	4.56705e+06	11	6.65964	95	15.1515
YIVEDTWAEV	Myosin-IIIa OS=Mus musculus OX=10090 GN=Myo3a PE=1 SV=1	Myo3a	1.80612e+07	10	7.25675	1053	66.3934		HTYDFEKL	Ribonucleoside-diphosphate reductase large subunit OS=Mus musculus OX=10090 GN=Rrm1 PE=1 SV=2	Rrm1	4551215	8	6.65813	94	14.992
KIEEIKDF	60S ribosomal protein L38 OS=Mus musculus OX=10090 GN=Rpl38 PE=1 SV=3	Rpl38	18053618	8	7.25656	1052	66.3304		LRHVNIDHL	Eukaryotic translation initiation factor 3 subunit H OS=Mus musculus OX=10090 GN=Eif3h PE=1 SV=1	Eif3h	4.51568e+06	9	6.65472	93	14.8325
LIEVDDER	40S ribosomal protein S6 OS=Mus musculus OX=10090 GN=Rps6 PE=1 SV=1	Rps6	18050618	8	7.25649	1051	66.2673		RAVDNQVYV	Omega-amidase NIT2 OS=Mus musculus OX=10090 GN=Nit2 PE=1 SV=1	Nit2	4502047	9	6.65341	92	14.673
FGIHNGVETL	Glycerophosphocholine phosphodiesterase GPCPD1 OS=Mus musculus OX=10090 GN=Gpcpd1 PE=1 SV=1	Gpcpd1	18048200	10	7.25643	1050	66.2043		IPELNGKLT	Glyceraldehyde-3-phosphate dehydrogenase OS=Mus musculus OX=10090 GN=Gapdh PE=1 SV=2	Gapdh	4.48562e+06	9	6.65182	91	14.5136
GQSVEDDY	HBS1-like protein OS=Mus musculus OX=10090 GN=Hbs1l PE=1 SV=2	Hbs1l	18034238	8	7.2561	1049	66.1412		VSTTNIAGHF	Rho guanine nucleotide exchange factor 2 OS=Mus musculus OX=10090 GN=Arhgef2 PE=1 SV=4	Arhgef2	4.46196e+06	10	6.64953	90	14.3541
SAPRHGSL	60S ribosomal protein L3 OS=Mus musculus OX=10090 GN=Rpl3 PE=1 SV=3	Rpl3	18002612	8	7.25534	1048	66.0782		LPTFDLPQ	Cyclic AMP-dependent transcription factor ATF-5 OS=Mus musculus OX=10090 GN=Atf5 PE=1 SV=2	Atf5	4.37344e+06	8	6.64082	89	14.1946
AVLTNQETI	Brefeldin A-inhibited guanine nucleotide-exchange protein 3 OS=Mus musculus OX=10090 GN=Arfgef3 PE=1 SV=1	Arfgef3	17844662	9	7.25151	1047	66.0151		KVSDTVVEPY	Tubulin beta-5 chain OS=Mus musculus OX=10090 GN=Tubb5 PE=1 SV=1;Tubulin beta-4B chain OS=Mus musculus OX=10090 GN=Tubb4b PE=1 SV=1	Tubb5	4369254	10	6.64041	88	14.0351
KGKLPKQPVIVK	60S ribosomal protein L27a OS=Mus musculus OX=10090 GN=Rpl27a PE=1 SV=5	Rpl27a	17842150	12	7.25145	1046	65.9521		TFGKKKGP	40S ribosomal protein S30 OS=Mus musculus OX=10090 GN=Fau PE=1 SV=1	Fau	4365602	8	6.64004	87	13.8756
SAHQNYAEWL	Ribosome-binding protein 1 OS=Mus musculus OX=10090 GN=Rrbp1 PE=1 SV=2	Rrbp1	17833350	10	7.25123	1045	65.889		LDHKFDLM	Tubulin alpha-1B chain OS=Mus musculus OX=10090 GN=Tuba1b PE=1 SV=2	Tuba1b	4365406	8	6.64002	86	13.7161
LAEAFGIIGT	Ran GTPase-activating protein 1 OS=Mus musculus OX=10090 GN=Rangap1 PE=1 SV=2	Rangap1	17807722	10	7.25061	1044	65.826		KSGDAAIVDMVP	Elongation factor 1-alpha 1 OS=Mus musculus OX=10090 GN=Eef1a1 PE=1 SV=3	Eef1a1	4.34356e+06	12	6.63785	85	13.5566
GFTTDLFGRDLS	Heterogeneous nuclear ribonucleoprotein F OS=Mus musculus OX=10090 GN=Hnrnpf PE=1 SV=3	Hnrnpf	17734210	12	7.24881	1043	65.7629		IDPTKVVR	60 kDa heat shock protein, mitochondrial OS=Mus musculus OX=10090 GN=Hspd1 PE=1 SV=1	Hspd1	4.33647e+06	8	6.63714	84	13.3971
GSVTHVTTF	Smoothelin OS=Mus musculus OX=10090 GN=Smtn PE=1 SV=2	Smtn	17628712	9	7.24622	1042	65.6999		RFTVTSQFT	Histidine decarboxylase OS=Mus musculus OX=10090 GN=Hdc PE=1 SV=2	Hdc	4.3261e+06	9	6.6361	83	13.2376
SQYLFPKL	Peroxisome proliferator-activated receptor delta OS=Mus musculus OX=10090 GN=Ppard PE=1 SV=1	Ppard	17627466	8	7.24619	1041	65.6368		FSVTNPHTM	Ligand-dependent nuclear receptor-interacting factor 1 OS=Mus musculus OX=10090 GN=Lrif1 PE=1 SV=2	Lrif1	4302276	9	6.6337	82	13.0781
EVHTGLGELL	Serpin H1 OS=Mus musculus OX=10090 GN=Serpinh1 PE=1 SV=3	Serpinh1	17610746	10	7.24578	1040	65.5738		FADDFVRSS	Serpin H1 OS=Mus musculus OX=10090 GN=Serpinh1 PE=1 SV=3	Serpinh1	4244967	9	6.62787	81	12.9187
SSVQNKEYL	Zinc finger protein 518B OS=Mus musculus OX=10090 GN=Znf518b PE=2 SV=1	Znf518b	17605778	9	7.24566	1039	65.5107		SGEGEVSGLLR	Transcription intermediary factor 1-beta OS=Mus musculus OX=10090 GN=Trim28 PE=1 SV=3	Trim28	4242418	11	6.62761	80	12.7592
GPSSVEDIKAK	Nucleophosmin OS=Mus musculus OX=10090 GN=Npm1 PE=1 SV=1	Npm1	17585742	11	7.24516	1038	65.4477		SAHQNYAEWL	Ribosome-binding protein 1 OS=Mus musculus OX=10090 GN=Rrbp1 PE=1 SV=2	Rrbp1	4.21565e+06	10	6.62486	79	12.5997
KGHAVGDIPGVR	40S ribosomal protein S23 OS=Mus musculus OX=10090 GN=Rps23 PE=1 SV=3	Rps23	17579616	12	7.24501	1037	65.3846		FAHIDGDHL	Pre-mRNA-splicing factor ATP-dependent RNA helicase DHX15 OS=Mus musculus OX=10090 GN=Dhx15 PE=1 SV=2	Dhx15	4.15946e+06	9	6.61904	78	12.4402
AGTRNIYYL	Heat shock protein 75 kDa, mitochondrial OS=Mus musculus OX=10090 GN=Trap1 PE=1 SV=1	Trap1	17566134	9	7.24468	1036	65.3216		RQILNADAM	Protein virilizer homolog OS=Mus musculus OX=10090 GN=Virma PE=1 SV=1	Virma	4.14935e+06	9	6.61798	77	12.2807
SVHQLVENTDET	Tubulin beta-5 chain OS=Mus musculus OX=10090 GN=Tubb5 PE=1 SV=1;Tubulin beta-4B chain OS=Mus musculus OX=10090 GN=Tubb4b PE=1 SV=1;Tubulin beta-6 chain OS=Mus musculus OX=10090 GN=Tubb6 PE=1 SV=1	Tubb5	17534236	12	7.24389	1035	65.2585		GVITVKDGKTLN	60 kDa heat shock protein, mitochondrial OS=Mus musculus OX=10090 GN=Hspd1 PE=1 SV=1	Hspd1	4.14688e+06	12	6.61772	76	12.1212
RAYRYLQL	Cytochrome c oxidase assembly protein COX14 OS=Mus musculus OX=10090 GN=Cox14 PE=3 SV=1	Cox14	17397778	8	7.24049	1034	65.1955		LTTKVLKPVV	Sorting nexin-25 OS=Mus musculus OX=10090 GN=Snx25 PE=1 SV=3	Snx25	4.12741e+06	10	6.61568	75	11.9617
QSLLIATTCLR	WD repeat- and FYVE domain-containing protein 4 OS=Mus musculus OX=10090 GN=Wdfy4 PE=1 SV=2	Wdfy4	17379524	11	7.24004	1033	65.1324		VIHDNFGIVE	Glyceraldehyde-3-phosphate dehydrogenase OS=Mus musculus OX=10090 GN=Gapdh PE=1 SV=2	Gapdh	4117319	10	6.61461	74	11.8022
SSPWPIGTSM	Neogenin OS=Mus musculus OX=10090 GN=Neo1 PE=1 SV=1	Neo1	17361400	10	7.23958	1032	65.0694		IDRVGQTIER	Heterogeneous nuclear ribonucleoprotein M OS=Mus musculus OX=10090 GN=Hnrnpm PE=1 SV=3	Hnrnpm	4.11408e+06	10	6.61427	73	11.6427
VITEEEKNF	60S ribosomal protein L13 OS=Mus musculus OX=10090 GN=Rpl13 PE=1 SV=3	Rpl13	17297074	9	7.23797	1031	65.0063		QTVAVGVIK	Elongation factor 1-alpha 1 OS=Mus musculus OX=10090 GN=Eef1a1 PE=1 SV=3	Eef1a1	4064568	9	6.60901	72	11.4833
VNVTTEVK	Elongation factor 1-alpha 1 OS=Mus musculus OX=10090 GN=Eef1a1 PE=1 SV=3	Eef1a1	17272254	8	7.23735	1030	64.9433		SNFGPMKGGNF	Heterogeneous nuclear ribonucleoprotein A1 OS=Mus musculus OX=10090 GN=Hnrnpa1 PE=1 SV=2	Hnrnpa1	4.05868e+06	11	6.60838	71	11.3238
FVYIFQEV	Plastin-3 OS=Mus musculus OX=10090 GN=Pls3 PE=1 SV=3	Pls3	17236172	8	7.23644	1029	64.8802		TSPTFFPK	Lysosomal alpha-glucosidase OS=Mus musculus OX=10090 GN=Gaa PE=1 SV=2	Gaa	4.05252e+06	8	6.60773	70	11.1643
FSGHNLEYL	Glutathione-specific gamma-glutamylcyclotransferase 1 OS=Mus musculus OX=10090 GN=Chac1 PE=1 SV=2	Chac1	17234898	9	7.23641	1028	64.8172		AATATANQIILK	Muscleblind-like protein 2 OS=Mus musculus OX=10090 GN=Mbnl2 PE=2 SV=2	Mbnl2	4014912	12	6.60368	69	11.0048
HILQEISGAY	Stearoyl-CoA desaturase 2 OS=Mus musculus OX=10090 GN=Scd2 PE=1 SV=2	Scd2	17203462	10	7.23562	1027	64.7541		LISKIREEYPD	Tubulin beta-5 chain OS=Mus musculus OX=10090 GN=Tubb5 PE=1 SV=1;Tubulin beta-4B chain OS=Mus musculus OX=10090 GN=Tubb4b PE=1 SV=1	Tubb5	3983933	11	6.60031	68	10.8453
PSKGPLQSVQVF	40S ribosomal protein S16 OS=Mus musculus OX=10090 GN=Rps16 PE=1 SV=4	Rps16	17197180	12	7.23546	1026	64.691		ITEFSDITR	Lamina-associated polypeptide 2, isoforms beta/delta/epsilon/gamma OS=Mus musculus OX=10090 GN=Tmpo PE=1 SV=4	Tmpo	3974375	9	6.59927	67	10.6858
GRFQTMEEKKAF	60S ribosomal protein L3 OS=Mus musculus OX=10090 GN=Rpl3 PE=1 SV=3	Rpl3	1.71756e+07	12	7.23491	1025	64.628		KKKKIRTSP	60S ribosomal protein L23a OS=Mus musculus OX=10090 GN=Rpl23a PE=1 SV=1	Rpl23a	3.97082e+06	9	6.59888	66	10.5263
VPTPNVSVVDL	Glyceraldehyde-3-phosphate dehydrogenase OS=Mus musculus OX=10090 GN=Gapdh PE=1 SV=2	Gapdh	17127740	11	7.2337	1024	64.5649		PLVDTHSK	Vimentin OS=Mus musculus OX=10090 GN=Vim PE=1 SV=3	Vim	3.96648e+06	8	6.5984	65	10.3668
RAILNYIAT	Glutathione S-transferase A1 OS=Mus musculus OX=10090 GN=Gsta1 PE=1 SV=2	Gsta1	17120854	9	7.23353	1023	64.5019		TLLIKTVETRDG	Vimentin OS=Mus musculus OX=10090 GN=Vim PE=1 SV=3	Vim	3.92823e+06	12	6.5942	64	10.2073
GGPAVWPLY	Protein O-glucosyltransferase 1 OS=Mus musculus OX=10090 GN=Poglut1 PE=1 SV=2	Poglut1	17069858	9	7.23223	1022	64.4388		VITEEEKNF	60S ribosomal protein L13 OS=Mus musculus OX=10090 GN=Rpl13 PE=1 SV=3	Rpl13	3.92514e+06	9	6.59386	63	10.0478
RNYEYLIRL	Transcription factor 25 OS=Mus musculus OX=10090 GN=Tcf25 PE=1 SV=2	Tcf25	16983214	9	7.23002	1021	64.3758		VGKYGTRY	60S ribosomal protein L37a OS=Mus musculus OX=10090 GN=Rpl37a PE=1 SV=2	Rpl37a	3.92274e+06	8	6.59359	62	9.88836
FVEQIRSQV	Small glutamine-rich tetratricopeptide repeat-containing protein alpha OS=Mus musculus OX=10090 GN=Sgta PE=1 SV=2	Sgta	16978852	9	7.22991	1020	64.3127		FLAASLQT	Rabenosyn-5 OS=Mus musculus OX=10090 GN=Rbsn PE=1 SV=1	Rbsn	3873330	8	6.58808	61	9.72887
FIAHPKLG	60S ribosomal protein L29 OS=Mus musculus OX=10090 GN=Rpl29 PE=1 SV=2	Rpl29	16891933	8	7.22768	1019	64.2497		NSFRYNGL	60S ribosomal protein L28 OS=Mus musculus OX=10090 GN=Rpl28 PE=1 SV=2	Rpl28	3.84824e+06	8	6.58526	60	9.56938
IPELNGKLT	Glyceraldehyde-3-phosphate dehydrogenase OS=Mus musculus OX=10090 GN=Gapdh PE=1 SV=2	Gapdh	16875258	9	7.22725	1018	64.1866		VAIRTEYNL	Plectin OS=Mus musculus OX=10090 GN=Plec PE=1 SV=3	Plec	3.81029e+06	9	6.58096	59	9.40989
MFGGSGTSSRP	Vimentin OS=Mus musculus OX=10090 GN=Vim PE=1 SV=3	Vim	16822548	11	7.22589	1017	64.1236		VSPTNPTKL	Disabled homolog 2-interacting protein OS=Mus musculus OX=10090 GN=Dab2ip PE=1 SV=1	Dab2ip	3762925	9	6.57553	58	9.2504
ATHDLEGPPLDA	Poly(rC)-binding protein 1 OS=Mus musculus OX=10090 GN=Pcbp1 PE=1 SV=1	Pcbp1	16618044	12	7.22058	1016	64.0605		KAVENYLIQM	Programmed cell death protein 5 OS=Mus musculus OX=10090 GN=Pdcd5 PE=1 SV=3	Pdcd5	3.74362e+06	10	6.57329	57	9.09091
RLDHKFDLM	Tubulin alpha-8 chain OS=Mus musculus OX=10090 GN=Tuba8 PE=1 SV=1;Tubulin alpha chain-like 3 OS=Mus musculus OX=10090 GN=Tubal3 PE=2 SV=2;Tubulin alpha-1A chain OS=Mus musculus OX=10090 GN=Tuba1a PE=1 SV=1;Tubulin alpha-1C chain OS=Mus musculus OX=10090 GN=Tuba1c PE=1 SV=1	Tuba8	16614222	9	7.22048	1015	63.9975		IVERLTNS	40S ribosomal protein S5 OS=Mus musculus OX=10090 GN=Rps5 PE=1 SV=3	Rps5	3.73923e+06	8	6.57278	56	8.93142
DAVKNGDYI	M-phase phosphoprotein 8 OS=Mus musculus OX=10090 GN=Mphosph8 PE=1 SV=1	Mphosph8	16569263	9	7.2193	1014	63.9344		YIDQEELNK	Heat shock protein HSP 90-alpha OS=Mus musculus OX=10090 GN=Hsp90aa1 PE=1 SV=4;Heat shock protein HSP 90-beta OS=Mus musculus OX=10090 GN=Hsp90ab1 PE=1 SV=3	Hsp90aa1	3687364	9	6.56672	55	8.77193
RNYQFDFL	Splicing factor 3A subunit 1 OS=Mus musculus OX=10090 GN=Sf3a1 PE=1 SV=1	Sf3a1	16542375	8	7.2186	1013	63.8714		NHPGQISAGYAP	Elongation factor 1-alpha 1 OS=Mus musculus OX=10090 GN=Eef1a1 PE=1 SV=3	Eef1a1	3684434	12	6.56637	54	8.61244
EEIKTLLQE	WD repeat-containing protein 11 OS=Mus musculus OX=10090 GN=Wdr11 PE=1 SV=1	Wdr11	16527437	9	7.21821	1012	63.8083		AGKVRGQTP	40S ribosomal protein S30 OS=Mus musculus OX=10090 GN=Fau PE=1 SV=1	Fau	3.66436e+06	9	6.564	53	8.45295
YGLIFHSTF	Nucleolar protein 56 OS=Mus musculus OX=10090 GN=Nop56 PE=1 SV=2	Nop56	16467296	9	7.21662	1011	63.7453		FAHHNRYVL	Tyrosine-protein kinase Fes/Fps OS=Mus musculus OX=10090 GN=Fes PE=1 SV=2	Fes	3.61872e+06	9	6.55855	52	8.29346
VSPTNPTKL	Disabled homolog 2-interacting protein OS=Mus musculus OX=10090 GN=Dab2ip PE=1 SV=1	Dab2ip	16411998	9	7.21516	1010	63.6822		RSPENPPSKEL	Centromere protein M OS=Mus musculus OX=10090 GN=Cenpm PE=2 SV=1	Cenpm	3.6124e+06	11	6.5578	51	8.13397
DIARNVLDLIY	Transmembrane channel-like protein 6 OS=Mus musculus OX=10090 GN=Tmc6 PE=1 SV=2	Tmc6	1.64058e+07	11	7.215	1009	63.6192		KNVLFSHL	cAMP-dependent protein kinase type I-beta regulatory subunit OS=Mus musculus OX=10090 GN=Prkar1b PE=1 SV=2	Prkar1b	3607990	8	6.55727	50	7.97448
TLRSEGFDTY	Proliferating cell nuclear antigen OS=Mus musculus OX=10090 GN=Pcna PE=1 SV=2	Pcna	16391731	10	7.21462	1008	63.5561		RSGVNSELV	Protein DEK OS=Mus musculus OX=10090 GN=Dek PE=1 SV=1	Dek	3.5931e+06	9	6.55547	49	7.81499
GPMKGGNFGGR	Heterogeneous nuclear ribonucleoprotein A1 OS=Mus musculus OX=10090 GN=Hnrnpa1 PE=1 SV=2	Hnrnpa1	16391679	11	7.21462	1007	63.4931		KVDENGKISRL	Ubiquitin-40S ribosomal protein S27a OS=Mus musculus OX=10090 GN=Rps27a PE=1 SV=2	Rps27a	3.57259e+06	11	6.55298	48	7.6555
ASPSSSCVM	Neuron navigator 3 OS=Mus musculus OX=10090 GN=Nav3 PE=1 SV=2	Nav3	16362564	9	7.21385	1006	63.43		ILGDHPSSF	Heterogeneous nuclear ribonucleoprotein L-like OS=Mus musculus OX=10090 GN=Hnrnpll PE=1 SV=3	Hnrnpll	3.51307e+06	9	6.54569	47	7.49601
SESRVEKDGLIL	Parkinson disease protein 7 homolog OS=Mus musculus OX=10090 GN=Park7 PE=1 SV=1	Park7	16358264	12	7.21374	1005	63.367		HGDSDLQLDR	Tubulin beta-5 chain OS=Mus musculus OX=10090 GN=Tubb5 PE=1 SV=1	Tubb5	3491239	10	6.54298	46	7.33652
KVLVFSQM	Lymphocyte-specific helicase OS=Mus musculus OX=10090 GN=Hells PE=1 SV=2	Hells	1.6356e+07	8	7.21368	1004	63.3039		VGVTYRTL	Protein MMS22-like OS=Mus musculus OX=10090 GN=Mms22l PE=1 SV=1	Mms22l	3472351	8	6.54062	45	7.17703
KVDENGKISRLR	Ubiquitin-40S ribosomal protein S27a OS=Mus musculus OX=10090 GN=Rps27a PE=1 SV=2	Rps27a	16323325	12	7.21281	1003	63.2409		VKAPLVLKD	Parkinson disease protein 7 homolog OS=Mus musculus OX=10090 GN=Park7 PE=1 SV=1	Park7	3.46952e+06	9	6.54027	44	7.01754
FSVENKWRLL	Cytochrome c oxidase subunit 7C, mitochondrial OS=Mus musculus OX=10090 GN=Cox7c PE=1 SV=1	Cox7c	16285693	10	7.21181	1002	63.1778		SVSADGMHIT	Fibrocystin-L OS=Mus musculus OX=10090 GN=Pkhd1l1 PE=1 SV=1	Pkhd1l1	3.44975e+06	10	6.53779	43	6.85805
RSPENPPSKEL	Centromere protein M OS=Mus musculus OX=10090 GN=Cenpm PE=2 SV=1	Cenpm	1.62296e+07	11	7.21031	1001	63.1148		ISPKHFVHL	Glucocorticoid modulatory element-binding protein 1 OS=Mus musculus OX=10090 GN=Gmeb1 PE=1 SV=2	Gmeb1	3.41656e+06	9	6.53359	42	6.69856
GSLKNVTTL	Erbin OS=Mus musculus OX=10090 GN=Erbin PE=1 SV=3	Erbin	16188192	9	7.2092	1000	63.0517		PKEQQEVVVL	Interferon-induced transmembrane protein 1 OS=Mus musculus OX=10090 GN=Ifitm1 PE=2 SV=1	Ifitm1	3.40289e+06	10	6.53185	41	6.53907
QIFRPDNF	Tubulin beta-5 chain OS=Mus musculus OX=10090 GN=Tubb5 PE=1 SV=1;Tubulin beta-4B chain OS=Mus musculus OX=10090 GN=Tubb4b PE=1 SV=1;Tubulin beta-6 chain OS=Mus musculus OX=10090 GN=Tubb6 PE=1 SV=1	Tubb5	16152049	8	7.20823	999	62.9887		INQIYEARV	Arf-GAP with coiled-coil, ANK repeat and PH domain-containing protein 1 OS=Mus musculus OX=10090 GN=Acap1 PE=1 SV=1	Acap1	3.39293e+06	9	6.53057	40	6.37959
NKELDPVQKLF	ATP synthase-coupling factor 6, mitochondrial OS=Mus musculus OX=10090 GN=Atp5pf PE=1 SV=1	Atp5pf	16139266	11	7.20788	998	62.9256		AKADGIVSKNF	40S ribosomal protein S21 OS=Mus musculus OX=10090 GN=Rps21 PE=1 SV=1	Rps21	3.32383e+06	11	6.52164	39	6.2201
KIKIIAPP	Actin, cytoplasmic 1 OS=Mus musculus OX=10090 GN=Actb PE=1 SV=1;Actin, alpha cardiac muscle 1 OS=Mus musculus OX=10090 GN=Actc1 PE=1 SV=1	Actb	16123443	8	7.20746	997	62.8625		GWTANMERIMKA	Heat shock protein HSP 90-alpha OS=Mus musculus OX=10090 GN=Hsp90aa1 PE=1 SV=4;Heat shock protein HSP 90-beta OS=Mus musculus OX=10090 GN=Hsp90ab1 PE=1 SV=3	Hsp90aa1	3.32212e+06	12	6.52141	38	6.06061
IGIVKQAGLD	Heterogeneous nuclear ribonucleoprotein F OS=Mus musculus OX=10090 GN=Hnrnpf PE=1 SV=3	Hnrnpf	16060739	10	7.20577	996	62.7995		EAFTDGDSTKAP	Metal transporter CNNM1 OS=Mus musculus OX=10090 GN=Cnnm1 PE=1 SV=5	Cnnm1	3287313	12	6.51684	37	5.90112
SRPGGYGY	RNA-binding protein 3 OS=Mus musculus OX=10090 GN=Rbm3 PE=1 SV=1	Rbm3	16051089	8	7.2055	995	62.7364		RIYQFTAA	Src kinase-associated phosphoprotein 2 OS=Mus musculus OX=10090 GN=Skap2 PE=1 SV=2	Skap2	3.27033e+06	8	6.51459	36	5.74163
SMEVNVDVL	Dysbindin OS=Mus musculus OX=10090 GN=Dtnbp1 PE=1 SV=1	Dtnbp1	16028987	9	7.20491	994	62.6734		SKGLVEKLTTY	Trifunctional enzyme subunit alpha, mitochondrial OS=Mus musculus OX=10090 GN=Hadha PE=1 SV=1	Hadha	3.24817e+06	11	6.51164	35	5.58214
SKEDDVRQY	40S ribosomal protein S6 OS=Mus musculus OX=10090 GN=Rps6 PE=1 SV=1	Rps6	15902876	9	7.20148	993	62.6103		RLITNSEEI	ATP-binding cassette sub-family D member 3 OS=Mus musculus OX=10090 GN=Abcd3 PE=1 SV=2	Abcd3	3.21912e+06	9	6.50774	34	5.42265
AGIENKFGL	Calcium-binding mitochondrial carrier protein Aralar1 OS=Mus musculus OX=10090 GN=Slc25a12 PE=1 SV=1	Slc25a12	15893882	9	7.20123	992	62.5473		RTLLIKTVETR	Vimentin OS=Mus musculus OX=10090 GN=Vim PE=1 SV=3	Vim	3.20982e+06	11	6.50648	33	5.26316
KAPIRPDIVNF	60S ribosomal protein L4 OS=Mus musculus OX=10090 GN=Rpl4 PE=1 SV=3	Rpl4	15888476	11	7.20108	991	62.4842		NATVRPPDSA	Coiled-coil domain-containing protein 194 OS=Mus musculus OX=10090 GN=Ccdc194 PE=3 SV=1	Ccdc194	3.18793e+06	10	6.50351	32	5.10367
TVPIEAVTSK	Src substrate cortactin OS=Mus musculus OX=10090 GN=Cttn PE=1 SV=2	Cttn	15884680	10	7.20098	990	62.4212		LRPLVKPKIVKK	60S ribosomal protein L32 OS=Mus musculus OX=10090 GN=Rpl32 PE=1 SV=2	Rpl32	3.18313e+06	12	6.50285	31	4.94418
AGFAGDDAPR	Actin, cytoplasmic 1 OS=Mus musculus OX=10090 GN=Actb PE=1 SV=1;Actin, alpha cardiac muscle 1 OS=Mus musculus OX=10090 GN=Actc1 PE=1 SV=1	Actb	15870287	10	7.20058	989	62.3581		VSVIIALR	G-protein coupled receptor 22 OS=Mus musculus OX=10090 GN=Gpr22 PE=2 SV=1	Gpr22	3.17457e+06	8	6.50169	30	4.78469
VQYKFSHL	Histone acetyltransferase KAT2A OS=Mus musculus OX=10090 GN=Kat2a PE=1 SV=2	Kat2a	15856975	8	7.20022	988	62.2951		RAGKVRGQTP	40S ribosomal protein S30 OS=Mus musculus OX=10090 GN=Fau PE=1 SV=1	Fau	3.17174e+06	10	6.5013	29	4.6252
RIVELFRNL	Signal transducer and activator of transcription 3 OS=Mus musculus OX=10090 GN=Stat3 PE=1 SV=2	Stat3	15851981	9	7.20008	987	62.232		AQVIILNHP	Elongation factor 1-alpha 1 OS=Mus musculus OX=10090 GN=Eef1a1 PE=1 SV=3	Eef1a1	3.08519e+06	9	6.48928	28	4.46571
SSYSFRHL	Lysosomal thioesterase PPT2 OS=Mus musculus OX=10090 GN=Ppt2 PE=1 SV=1	Ppt2	15802831	8	7.19873	986	62.169		SKKDWYDVKAP	40S ribosomal protein S3a OS=Mus musculus OX=10090 GN=Rps3a PE=1 SV=3	Rps3a	3.0754e+06	11	6.4879	27	4.30622
NTTAIAEAWAR	Tubulin alpha-8 chain OS=Mus musculus OX=10090 GN=Tuba8 PE=1 SV=1;Tubulin alpha-1A chain OS=Mus musculus OX=10090 GN=Tuba1a PE=1 SV=1;Tubulin alpha-1C chain OS=Mus musculus OX=10090 GN=Tuba1c PE=1 SV=1	Tuba8	15791985	11	7.19844	985	62.1059		GKVNLVQL	Blood group Rh(D) polypeptide OS=Mus musculus OX=10090 GN=Rhd PE=1 SV=1	Rhd	2984221	8	6.47483	26	4.14673
RGYEFLGV	F-box/SPRY domain-containing protein 1 OS=Mus musculus OX=10090 GN=Fbxo45 PE=1 SV=2	Fbxo45	15760921	8	7.19758	984	62.0429		DVKFGADA	60 kDa heat shock protein, mitochondrial OS=Mus musculus OX=10090 GN=Hspd1 PE=1 SV=1	Hspd1	2900129	8	6.46242	25	3.98724
EVRVFDTPP	5,6-dihydroxyindole-2-carboxylic acid oxidase OS=Mus musculus OX=10090 GN=Tyrp1 PE=1 SV=1	Tyrp1	15731166	9	7.19676	983	61.9798		GDGIARVH	ATP synthase subunit alpha, mitochondrial OS=Mus musculus OX=10090 GN=Atp5f1a PE=1 SV=1	Atp5f1a	2.85868e+06	8	6.45617	24	3.82775
SAIRGQAEV	Polycomb group protein ASXL1 OS=Mus musculus OX=10090 GN=Asxl1 PE=1 SV=1	Asxl1	15703233	9	7.19599	982	61.9168		LLGDHPAEY	Heterogeneous nuclear ribonucleoprotein L OS=Mus musculus OX=10090 GN=Hnrnpl PE=1 SV=2	Hnrnpl	2.85561e+06	9	6.4557	23	3.66826
GNPTVEVDLY	Alpha-enolase OS=Mus musculus OX=10090 GN=Eno1 PE=1 SV=3	Eno1	15693795	10	7.19573	981	61.8537		KRFTDEESRVF	Bcl-2-associated transcription factor 1 OS=Mus musculus OX=10090 GN=Bclaf1 PE=1 SV=2	Bclaf1	2852781	11	6.45527	22	3.50877
GLQFPVGR	Histone H2A.Z OS=Mus musculus OX=10090 GN=H2az1 PE=1 SV=2;Histone H2AX OS=Mus musculus OX=10090 GN=H2ax PE=1 SV=2	H2az1	15692698	8	7.1957	980	61.7907		TTHPQFVIATR	5,6-dihydroxyindole-2-carboxylic acid oxidase OS=Mus musculus OX=10090 GN=Tyrp1 PE=1 SV=1	Tyrp1	2.80404e+06	11	6.44778	21	3.34928
TTDLFGRDLSY	Heterogeneous nuclear ribonucleoprotein F OS=Mus musculus OX=10090 GN=Hnrnpf PE=1 SV=3	Hnrnpf	15637022	11	7.19415	979	61.7276		TEDVPRKL	60S ribosomal protein L6 OS=Mus musculus OX=10090 GN=Rpl6 PE=1 SV=3	Rpl6	2.79565e+06	8	6.44648	20	3.18979
YIGIVKQAGLD	Heterogeneous nuclear ribonucleoprotein F OS=Mus musculus OX=10090 GN=Hnrnpf PE=1 SV=3	Hnrnpf	15626641	11	7.19387	978	61.6646		QSIQSYLR	ER degradation-enhancing alpha-mannosidase-like protein 1 OS=Mus musculus OX=10090 GN=Edem1 PE=1 SV=1	Edem1	2.79061e+06	8	6.4457	19	3.0303
SAVSNNYIQTL	Catenin delta-1 OS=Mus musculus OX=10090 GN=Ctnnd1 PE=1 SV=2	Ctnnd1	15611619	11	7.19345	977	61.6015		KLIEVDDERKL	40S ribosomal protein S6 OS=Mus musculus OX=10090 GN=Rps6 PE=1 SV=1	Rps6	2.786e+06	11	6.44498	18	2.87081
RTATADDKKLQF	Transcription factor BTF3 OS=Mus musculus OX=10090 GN=Btf3 PE=1 SV=3	Btf3	15561973	12	7.19206	976	61.5385		KVYLYTHL	Uncharacterized protein KIAA0513 OS=Mus musculus OX=10090 GN=Kiaa0513 PE=1 SV=1	Kiaa0513	2.77308e+06	8	6.44296	17	2.71132
SALVFTRL	Glycosylated lysosomal membrane protein OS=Mus musculus OX=10090 GN=Glmp PE=1 SV=1	Glmp	15558123	8	7.19196	975	61.4754		FGDSRGGGGNF	Heterogeneous nuclear ribonucleoproteins A2/B1 OS=Mus musculus OX=10090 GN=Hnrnpa2b1 PE=1 SV=2	Hnrnpa2b1	2.75015e+06	11	6.43936	16	2.55183
GHYTEGAELVD	Tubulin beta-3 chain OS=Mus musculus OX=10090 GN=Tubb3 PE=1 SV=1;Tubulin beta-5 chain OS=Mus musculus OX=10090 GN=Tubb5 PE=1 SV=1;Tubulin beta-4B chain OS=Mus musculus OX=10090 GN=Tubb4b PE=1 SV=1;Tubulin beta-6 chain OS=Mus musculus OX=10090 GN=Tubb6 PE=1 SV=1	Tubb3	15555765	11	7.19189	974	61.4124		LSDGVAVLK	60 kDa heat shock protein, mitochondrial OS=Mus musculus OX=10090 GN=Hspd1 PE=1 SV=1	Hspd1	2.60141e+06	9	6.41521	15	2.39234
RNVVKIQKHVTF	Tryptophan--tRNA ligase, cytoplasmic OS=Mus musculus OX=10090 GN=Wars1 PE=1 SV=2	Wars1	1.54863e+07	12	7.18995	973	61.3493		VGGSPPASST	Regulatory-associated protein of mTOR OS=Mus musculus OX=10090 GN=Rptor PE=1 SV=1	Rptor	2.56312e+06	10	6.40877	14	2.23285
RILAHLTGTEF	PDZ and LIM domain protein 7 OS=Mus musculus OX=10090 GN=Pdlim7 PE=1 SV=1	Pdlim7	15473187	11	7.18958	972	61.2863		LTPEEEEILNKK	40S ribosomal protein S8 OS=Mus musculus OX=10090 GN=Rps8 PE=1 SV=2	Rps8	2.47582e+06	12	6.39372	13	2.07337
VAFAYKNV	Translocon-associated protein subunit gamma OS=Mus musculus OX=10090 GN=Ssr3 PE=1 SV=1	Ssr3	15468623	8	7.18945	971	61.2232		RLGAAPEEESAY	NSFL1 cofactor p47 OS=Mus musculus OX=10090 GN=Nsfl1c PE=1 SV=1	Nsfl1c	2.47137e+06	12	6.39294	12	1.91388
RMLENYEEI	Cullin-7 OS=Mus musculus OX=10090 GN=Cul7 PE=1 SV=2	Cul7	15435902	9	7.18853	970	61.1602		FISDGVKKTL	Complement C3 OS=Mus musculus OX=10090 GN=C3 PE=1 SV=3	C3	2.42732e+06	10	6.38513	11	1.75439
KVANVSLLAL	40S ribosomal protein S23 OS=Mus musculus OX=10090 GN=Rps23 PE=1 SV=3	Rps23	15423804	10	7.18819	969	61.0971		HDSLSNRTL	Kinesin-like protein KIF9 OS=Mus musculus OX=10090 GN=Kif9 PE=1 SV=2	Kif9	2391728	9	6.37871	10	1.5949
SGVSNPHVI	YEATS domain-containing protein 2 OS=Mus musculus OX=10090 GN=Yeats2 PE=1 SV=2	Yeats2	15413746	9	7.18791	968	61.034		AERLASGELRLS	Immunoglobulin superfamily member 8 OS=Mus musculus OX=10090 GN=Igsf8 PE=1 SV=2	Igsf8	2.38027e+06	12	6.37663	9	1.43541
STIRLLTSL	T-complex protein 1 subunit gamma OS=Mus musculus OX=10090 GN=Cct3 PE=1 SV=1	Cct3	15397432	9	7.18745	967	60.971		KDVNAAIATIK	Tubulin alpha-1B chain OS=Mus musculus OX=10090 GN=Tuba1b PE=1 SV=2	Tuba1b	2379567	11	6.3765	8	1.27592
KLEDGPKFL	Elongation factor 1-alpha 1 OS=Mus musculus OX=10090 GN=Eef1a1 PE=1 SV=3	Eef1a1	15374093	9	7.18679	966	60.9079		RIDEFESM	Moesin OS=Mus musculus OX=10090 GN=Msn PE=1 SV=3	Msn	2334003	8	6.3681	7	1.11643
RQLENGTTL	Extended synaptotagmin-2 OS=Mus musculus OX=10090 GN=Esyt2 PE=1 SV=1	Esyt2	15372438	9	7.18674	965	60.8449		MREIVHIQA	Tubulin beta-5 chain OS=Mus musculus OX=10090 GN=Tubb5 PE=1 SV=1;Tubulin beta-4B chain OS=Mus musculus OX=10090 GN=Tubb4b PE=1 SV=1	Tubb5	2322191	9	6.3659	6	0.956938
RIIKTEVKKLQ	60S ribosomal protein L14 OS=Mus musculus OX=10090 GN=Rpl14 PE=1 SV=3	Rpl14	15344995	11	7.18597	964	60.7818		APIDRVGQTIE	Heterogeneous nuclear ribonucleoprotein M OS=Mus musculus OX=10090 GN=Hnrnpm PE=1 SV=3	Hnrnpm	2.16021e+06	11	6.3345	5	0.797448
AMNVNEIFM	Ras-related protein Rab-5C OS=Mus musculus OX=10090 GN=Rab5c PE=1 SV=2	Rab5c	15313317	9	7.18507	963	60.7188		YKDDPVDL	Thyroid hormone receptor-associated protein 3 OS=Mus musculus OX=10090 GN=Thrap3 PE=1 SV=1	Thrap3	1.90409e+06	8	6.27969	4	0.637959
ISFKFDHL	F-actin-capping protein subunit alpha-1 OS=Mus musculus OX=10090 GN=Capza1 PE=1 SV=4	Capza1	15308770	8	7.18494	962	60.6557		VRVGGSSVDLH	Catenin delta-1 OS=Mus musculus OX=10090 GN=Ctnnd1 PE=1 SV=2	Ctnnd1	1.78985e+06	11	6.25282	3	0.478469
KNELFSNL	Na(+)/H(+) exchange regulatory cofactor NHE-RF1 OS=Mus musculus OX=10090 GN=Slc9a3r1 PE=1 SV=3	Slc9a3r1	15262126	8	7.18362	961	60.5927		VTIIDAPGHR	Elongation factor 1-alpha 1 OS=Mus musculus OX=10090 GN=Eef1a1 PE=1 SV=3	Eef1a1	1.71324e+06	10	6.23382	2	0.318979
LITGKEDAANNY	Tubulin alpha-8 chain OS=Mus musculus OX=10090 GN=Tuba8 PE=1 SV=1;Tubulin alpha-1A chain OS=Mus musculus OX=10090 GN=Tuba1a PE=1 SV=1;Tubulin alpha-1C chain OS=Mus musculus OX=10090 GN=Tuba1c PE=1 SV=1	Tuba8	15255059	12	7.18341	960	60.5296		SAVTNSGVHL	GTP-binding protein 8 OS=Mus musculus OX=10090 GN=Gtpbp8 PE=2 SV=1	Gtpbp8	1.70183e+06	10	6.23092	1	0.15949
LRVAPEEHPVLL	Actin, cytoplasmic 1 OS=Mus musculus OX=10090 GN=Actb PE=1 SV=1	Actb	15194975	12	7.1817	959	60.4666
SFRNPLAK	Alpha-enolase OS=Mus musculus OX=10090 GN=Eno1 PE=1 SV=3	Eno1	15187499	8	7.18149	958	60.4035
SAPYGRITL	Cytoplasmic FMR1-interacting protein 2 OS=Mus musculus OX=10090 GN=Cyfip2 PE=1 SV=2	Cyfip2	15186531	9	7.18146	957	60.3405
TTHPQFVIATR	5,6-dihydroxyindole-2-carboxylic acid oxidase OS=Mus musculus OX=10090 GN=Tyrp1 PE=1 SV=1	Tyrp1	15172216	11	7.18105	956	60.2774
KKVKLAVLKY	Ubiquitin-40S ribosomal protein S27a OS=Mus musculus OX=10090 GN=Rps27a PE=1 SV=2	Rps27a	15155985	10	7.18058	955	60.2144
GVRLTELLKQGQ	ATP synthase subunit alpha, mitochondrial OS=Mus musculus OX=10090 GN=Atp5f1a PE=1 SV=1	Atp5f1a	14919273	12	7.17375	954	60.1513
GQKYFDSGDY	cAMP-regulated phosphoprotein 19 OS=Mus musculus OX=10090 GN=Arpp19 PE=1 SV=2;Alpha-endosulfine OS=Mus musculus OX=10090 GN=Ensa PE=1 SV=1	Arpp19	14914643	10	7.17361	953	60.0883
AALKLGQEL	Protein flightless-1 homolog OS=Mus musculus OX=10090 GN=Flii PE=1 SV=1	Flii	14902982	9	7.17327	952	60.0252
GLQFPVGRVH	Histone H2AX OS=Mus musculus OX=10090 GN=H2ax PE=1 SV=2	H2ax	14901051	10	7.17322	951	59.9622
LDHKFDLM	Tubulin alpha-8 chain OS=Mus musculus OX=10090 GN=Tuba8 PE=1 SV=1;Tubulin alpha chain-like 3 OS=Mus musculus OX=10090 GN=Tubal3 PE=2 SV=2;Tubulin alpha-1A chain OS=Mus musculus OX=10090 GN=Tuba1a PE=1 SV=1;Tubulin alpha-1C chain OS=Mus musculus OX=10090 GN=Tuba1c PE=1 SV=1	Tuba8	14882350	8	7.17267	950	59.8991
EELPNPNHSMV	5,6-dihydroxyindole-2-carboxylic acid oxidase OS=Mus musculus OX=10090 GN=Tyrp1 PE=1 SV=1	Tyrp1	14864229	11	7.17214	949	59.8361
KEPELLEPIP	60S ribosomal protein L21 OS=Mus musculus OX=10090 GN=Rpl21 PE=1 SV=3	Rpl21	14791481	10	7.17001	948	59.773
SLKNMTVE	(E3-independent) E2 ubiquitin-conjugating enzyme UBE2O OS=Mus musculus OX=10090 GN=Ube2o PE=1 SV=3	Ube2o	14762680	8	7.16917	947	59.71
APVNVTTEVK	Elongation factor 1-alpha 1 OS=Mus musculus OX=10090 GN=Eef1a1 PE=1 SV=3	Eef1a1	14749226	10	7.16877	946	59.6469
FADDFVRSS	Serpin H1 OS=Mus musculus OX=10090 GN=Serpinh1 PE=1 SV=3	Serpinh1	14713372	9	7.16771	945	59.5839
AALENDKTI	WD repeat-containing protein 5 OS=Mus musculus OX=10090 GN=Wdr5 PE=1 SV=1	Wdr5	14687512	9	7.16695	944	59.5208
SGYIPARL	Serine/threonine-protein kinase PLK1 OS=Mus musculus OX=10090 GN=Plk1 PE=1 SV=2	Plk1	14646308	8	7.16573	943	59.4578
STIHSRSET	Lysophosphatidic acid receptor 3 OS=Mus musculus OX=10090 GN=Lpar3 PE=1 SV=1	Lpar3	14602733	9	7.16443	942	59.3947
LVGNRAPVAI	Eukaryotic translation initiation factor 2D OS=Mus musculus OX=10090 GN=Eif2d PE=1 SV=3	Eif2d	14572932	10	7.16355	941	59.3317
RGVDLDQLLDMS	40S ribosomal protein S15 OS=Mus musculus OX=10090 GN=Rps15 PE=1 SV=2	Rps15	14566409	12	7.16335	940	59.2686
ELFLGTHEL	Cilia- and flagella-associated protein 206 OS=Mus musculus OX=10090 GN=Cfap206 PE=2 SV=2	Cfap206	14551408	9	7.16291	939	59.2055
SLGSALRPS	Vimentin OS=Mus musculus OX=10090 GN=Vim PE=1 SV=3	Vim	14525061	9	7.16212	938	59.1425
VALENANAV	Nucleolar protein 56 OS=Mus musculus OX=10090 GN=Nop56 PE=1 SV=2	Nop56	14474183	9	7.16059	937	59.0794
SQLSHCVNL	Dystrophin OS=Mus musculus OX=10090 GN=Dmd PE=1 SV=3	Dmd	14458848	9	7.16013	936	59.0164
RSFRNPLAK	Alpha-enolase OS=Mus musculus OX=10090 GN=Eno1 PE=1 SV=3	Eno1	14445494	9	7.15973	935	58.9533
RALTVPELTQQ	Tubulin beta-3 chain OS=Mus musculus OX=10090 GN=Tubb3 PE=1 SV=1;Tubulin beta-5 chain OS=Mus musculus OX=10090 GN=Tubb5 PE=1 SV=1;Tubulin beta-4B chain OS=Mus musculus OX=10090 GN=Tubb4b PE=1 SV=1;Tubulin beta-6 chain OS=Mus musculus OX=10090 GN=Tubb6 PE=1 SV=1	Tubb3	14443986	11	7.15969	934	58.8903
IIENGETEKPVS	Oligoribonuclease, mitochondrial OS=Mus musculus OX=10090 GN=Rexo2 PE=1 SV=2	Rexo2	14330659	12	7.15627	933	58.8272
SGEGEVSGLLR	Transcription intermediary factor 1-beta OS=Mus musculus OX=10090 GN=Trim28 PE=1 SV=3	Trim28	14327801	11	7.15618	932	58.7642
AIEEQVAVIY	ATP synthase subunit alpha, mitochondrial OS=Mus musculus OX=10090 GN=Atp5f1a PE=1 SV=1	Atp5f1a	14326445	10	7.15614	931	58.7011
KKQFDAGT	RNA-binding protein 5 OS=Mus musculus OX=10090 GN=Rbm5 PE=1 SV=1	Rbm5	14320734	8	7.15597	930	58.6381
FSIKNKKGSEL	Moesin OS=Mus musculus OX=10090 GN=Msn PE=1 SV=3	Msn	14309057	11	7.15561	929	58.575
FAPYNKPSL	Probable E3 ubiquitin-protein ligase DTX2 OS=Mus musculus OX=10090 GN=Dtx2 PE=1 SV=2	Dtx2	14221444	9	7.15294	928	58.512
SLPTNLIHL	E3 ubiquitin-protein ligase UBR2 OS=Mus musculus OX=10090 GN=Ubr2 PE=1 SV=2	Ubr2	14205169	9	7.15245	927	58.4489
SGYKFGVL	General transcription factor IIE subunit 2 OS=Mus musculus OX=10090 GN=Gtf2e2 PE=1 SV=2	Gtf2e2	14180528	8	7.15169	926	58.3859
NILGTNTIMDK	Heterogeneous nuclear ribonucleoprotein U OS=Mus musculus OX=10090 GN=Hnrnpu PE=1 SV=1	Hnrnpu	14146547	11	7.15065	925	58.3228
GQVVIIHML	AP-3 complex subunit beta-1 OS=Mus musculus OX=10090 GN=Ap3b1 PE=1 SV=2	Ap3b1	14087039	9	7.14882	924	58.2598
IGRIEDVTP	40S ribosomal protein S14 OS=Mus musculus OX=10090 GN=Rps14 PE=1 SV=3	Rps14	14046356	9	7.14756	923	58.1967
TNPSFDGRL	Atlastin-2 OS=Mus musculus OX=10090 GN=Atl2 PE=1 SV=1	Atl2	14023561	9	7.14686	922	58.1337
FSVEGQENL	Cap-specific mRNA (nucleoside-2'-O-)-methyltransferase 1 OS=Mus musculus OX=10090 GN=Cmtr1 PE=1 SV=1	Cmtr1	13990315	9	7.14583	921	58.0706
RQLDMILDEQR	Protein ERGIC-53 OS=Mus musculus OX=10090 GN=Lman1 PE=1 SV=1	Lman1	13981141	11	7.14554	920	58.0076
ASYLFRGL	Transmembrane channel-like protein 6 OS=Mus musculus OX=10090 GN=Tmc6 PE=1 SV=2	Tmc6	13973235	8	7.1453	919	57.9445
KNLFSPIMSEN	Pro-interleukin-16 OS=Mus musculus OX=10090 GN=Il16 PE=1 SV=3	Il16	13926495	11	7.14384	918	57.8815
SILTTHTTLE	Tubulin alpha-8 chain OS=Mus musculus OX=10090 GN=Tuba8 PE=1 SV=1;Tubulin alpha-1A chain OS=Mus musculus OX=10090 GN=Tuba1a PE=1 SV=1;Tubulin alpha-1C chain OS=Mus musculus OX=10090 GN=Tuba1c PE=1 SV=1	Tuba8	13861037	10	7.1418	917	57.8184
VESFSDYPPLG	Elongation factor 1-alpha 1 OS=Mus musculus OX=10090 GN=Eef1a1 PE=1 SV=3	Eef1a1	13851760	11	7.1415	916	57.7554
GNRIVYLY	60S ribosomal protein L34 OS=Mus musculus OX=10090 GN=Rpl34 PE=1 SV=2	Rpl34	13777429	8	7.13917	915	57.6923
SIQGQHTISP	Poly(rC)-binding protein 1 OS=Mus musculus OX=10090 GN=Pcbp1 PE=1 SV=1	Pcbp1	13762702	10	7.1387	914	57.6293
VSYLFSHV	Ribose-phosphate pyrophosphokinase 2 OS=Mus musculus OX=10090 GN=Prps2 PE=1 SV=4	Prps2	13759826	8	7.13861	913	57.5662
EAFTDGDSTKAP	Metal transporter CNNM1 OS=Mus musculus OX=10090 GN=Cnnm1 PE=1 SV=5	Cnnm1	13714906	12	7.13719	912	57.5032
RVIDFFTV	Lethal(2) giant larvae protein homolog 1 OS=Mus musculus OX=10090 GN=Llgl1 PE=1 SV=1	Llgl1	13676116	8	7.13596	911	57.4401
YSPTGKEFV	DDB1- and CUL4-associated factor 13 OS=Mus musculus OX=10090 GN=Dcaf13 PE=2 SV=2	Dcaf13	13672492	9	7.13585	910	57.377
GMANLLTGPK	Synaptic vesicle membrane protein VAT-1 homolog OS=Mus musculus OX=10090 GN=Vat1 PE=1 SV=3	Vat1	13620754	10	7.1342	909	57.314
HFISDGVKKTL	Complement C3 OS=Mus musculus OX=10090 GN=C3 PE=1 SV=3	C3	13592916	11	7.13331	908	57.2509
SALINLSSF	Transcription initiation factor TFIID subunit 12 OS=Mus musculus OX=10090 GN=Taf12 PE=1 SV=1	Taf12	13575403	9	7.13275	907	57.1879
SNILYVDES	Ribosomal protein S6 kinase alpha-3 OS=Mus musculus OX=10090 GN=Rps6ka3 PE=1 SV=2	Rps6ka3	13547145	9	7.13185	906	57.1248
KKVGIVGKYGT	60S ribosomal protein L37a OS=Mus musculus OX=10090 GN=Rpl37a PE=1 SV=2	Rpl37a	13540739	11	7.13164	905	57.0618
YTIENPRHF	Staphylococcal nuclease domain-containing protein 1 OS=Mus musculus OX=10090 GN=Snd1 PE=1 SV=1	Snd1	13537516	9	7.13154	904	56.9987
KDWYDVKAP	40S ribosomal protein S3a OS=Mus musculus OX=10090 GN=Rps3a PE=1 SV=3	Rps3a	13533097	9	7.1314	903	56.9357
TPGNRIVY	60S ribosomal protein L34 OS=Mus musculus OX=10090 GN=Rpl34 PE=1 SV=2	Rpl34	13502918	8	7.13043	902	56.8726
LRHVNIDHL	Eukaryotic translation initiation factor 3 subunit H OS=Mus musculus OX=10090 GN=Eif3h PE=1 SV=1	Eif3h	13458877	9	7.12901	901	56.8096
SPGGAYVTRSS	Vimentin OS=Mus musculus OX=10090 GN=Vim PE=1 SV=3	Vim	13444417	11	7.12854	900	56.7465
RRHPYFYAPELL	Albumin OS=Mus musculus OX=10090 GN=Alb PE=1 SV=3	Alb	13419935	12	7.12775	899	56.6835
QTVENVEHL	TELO2-interacting protein 1 homolog OS=Mus musculus OX=10090 GN=Tti1 PE=1 SV=2	Tti1	13399724	9	7.1271	898	56.6204
RTQAPAVATT	40S ribosomal protein S2 OS=Mus musculus OX=10090 GN=Rps2 PE=1 SV=3	Rps2	13374730	10	7.12629	897	56.5574
LRPLVKPKIVKK	60S ribosomal protein L32 OS=Mus musculus OX=10090 GN=Rpl32 PE=1 SV=2	Rpl32	13352435	12	7.12556	896	56.4943
VVDLMAYMASKE	Glyceraldehyde-3-phosphate dehydrogenase OS=Mus musculus OX=10090 GN=Gapdh PE=1 SV=2	Gapdh	13348590	12	7.12544	895	56.4313
TSPINAEKL	Myosin light chain kinase, smooth muscle OS=Mus musculus OX=10090 GN=Mylk PE=1 SV=3	Mylk	13324205	9	7.12464	894	56.3682
KVSDTVVEPY	Tubulin beta-3 chain OS=Mus musculus OX=10090 GN=Tubb3 PE=1 SV=1;Tubulin beta-5 chain OS=Mus musculus OX=10090 GN=Tubb5 PE=1 SV=1;Tubulin beta-4B chain OS=Mus musculus OX=10090 GN=Tubb4b PE=1 SV=1;Tubulin beta-6 chain OS=Mus musculus OX=10090 GN=Tubb6 PE=1 SV=1	Tubb3	13217535	10	7.12115	893	56.3052
DAAIVGAVRLLS	Solute carrier family 2, facilitated glucose transporter member 6 OS=Mus musculus OX=10090 GN=Slc2a6 PE=1 SV=1	Slc2a6	13178019	12	7.11985	892	56.2421
LVKPKIVKK	60S ribosomal protein L32 OS=Mus musculus OX=10090 GN=Rpl32 PE=1 SV=2	Rpl32	13148067	9	7.11886	891	56.1791
AATATANQIILK	Muscleblind-like protein 2 OS=Mus musculus OX=10090 GN=Mbnl2 PE=2 SV=2	Mbnl2	13090208	12	7.11695	890	56.116
HAVGDIPGVRF	40S ribosomal protein S23 OS=Mus musculus OX=10090 GN=Rps23 PE=1 SV=3	Rps23	13089436	11	7.11692	889	56.053
TLHLQTGNLLNW	Glutamate--cysteine ligase regulatory subunit OS=Mus musculus OX=10090 GN=Gclm PE=1 SV=1	Gclm	13034400	12	7.11509	888	55.9899
FGIGQDIQPK	60S ribosomal protein L7a OS=Mus musculus OX=10090 GN=Rpl7a PE=1 SV=2	Rpl7a	13032779	10	7.11504	887	55.9269
GVITVKDGKTLN	60 kDa heat shock protein, mitochondrial OS=Mus musculus OX=10090 GN=Hspd1 PE=1 SV=1	Hspd1	13009971	12	7.11428	886	55.8638
VDQLDFWE	Neuronal acetylcholine receptor subunit alpha-4 OS=Mus musculus OX=10090 GN=Chrna4 PE=1 SV=2	Chrna4	12984290	8	7.11342	885	55.8008
GESDDSILRLA	40S ribosomal protein S21 OS=Mus musculus OX=10090 GN=Rps21 PE=1 SV=1	Rps21	12966464	11	7.11282	884	55.7377
RLPLQDVY	Elongation factor 1-alpha 1 OS=Mus musculus OX=10090 GN=Eef1a1 PE=1 SV=3	Eef1a1	12966361	8	7.11282	883	55.6747
STLRNIQGLF	Proteasome maturation protein OS=Mus musculus OX=10090 GN=Pomp PE=1 SV=1	Pomp	12946742	10	7.11216	882	55.6116
KKIEDNNTLVF	60S ribosomal protein L23a OS=Mus musculus OX=10090 GN=Rpl23a PE=1 SV=1	Rpl23a	12931914	11	7.11166	881	55.5485
GQIFRPDNF	Tubulin beta-5 chain OS=Mus musculus OX=10090 GN=Tubb5 PE=1 SV=1;Tubulin beta-4B chain OS=Mus musculus OX=10090 GN=Tubb4b PE=1 SV=1;Tubulin beta-6 chain OS=Mus musculus OX=10090 GN=Tubb6 PE=1 SV=1	Tubb5	12928140	9	7.11154	880	55.4855
TSGPPVSELITK	Histone H1.4 OS=Mus musculus OX=10090 GN=H1-4 PE=1 SV=2	H1-4	12871509	12	7.10963	879	55.4224
QTVAVGVIK	Elongation factor 1-alpha 1 OS=Mus musculus OX=10090 GN=Eef1a1 PE=1 SV=3	Eef1a1	12853455	9	7.10902	878	55.3594
AALQELLSK	40S ribosomal protein S25 OS=Mus musculus OX=10090 GN=Rps25 PE=1 SV=1	Rps25	12841929	9	7.10863	877	55.2963
SKFDVSGYPTI	Protein disulfide-isomerase A4 OS=Mus musculus OX=10090 GN=Pdia4 PE=1 SV=3	Pdia4	12821490	11	7.10794	876	55.2333
SSYFTNMF	Coagulation factor VIII OS=Mus musculus OX=10090 GN=F8 PE=2 SV=2	F8	12810114	8	7.10755	875	55.1702
LASTAGPR	Dual specificity protein kinase CLK3 OS=Mus musculus OX=10090 GN=Clk3 PE=1 SV=2	Clk3	12807454	8	7.10746	874	55.1072
FAYEGRDYI	H-2 class I histocompatibility antigen, D-B alpha chain OS=Mus musculus OX=10090 GN=H2-D1 PE=1 SV=2	H2-D1	12803587	9	7.10733	873	55.0441
SSISHSVLSEM	ADP-ribosylation factor GTPase-activating protein 2 OS=Mus musculus OX=10090 GN=Arfgap2 PE=1 SV=1	Arfgap2	12754981	11	7.10568	872	54.9811
SALALRWEA	A-kinase anchor protein 2 OS=Mus musculus OX=10090 GN=Akap2 PE=1 SV=3	Akap2	12746179	9	7.10538	871	54.918
NTKESYDDVSSF	Probable rRNA-processing protein EBP2 OS=Mus musculus OX=10090 GN=Ebna1bp2 PE=2 SV=1	Ebna1bp2	12736356	12	7.10505	870	54.855
SSIVSSIEF	E3 ubiquitin-protein ligase COP1 OS=Mus musculus OX=10090 GN=Cop1 PE=1 SV=2	Cop1	12727309	9	7.10474	869	54.7919
VIQVFQQL	Dephospho-CoA kinase domain-containing protein OS=Mus musculus OX=10090 GN=Dcakd PE=1 SV=1	Dcakd	12679820	8	7.10311	868	54.7289
ISFTHIISNM	28S ribosomal protein S31, mitochondrial OS=Mus musculus OX=10090 GN=Mrps31 PE=1 SV=1	Mrps31	12671259	10	7.10282	867	54.6658
GKLPKQPVIVK	60S ribosomal protein L27a OS=Mus musculus OX=10090 GN=Rpl27a PE=1 SV=5	Rpl27a	12638264	11	7.10169	866	54.6028
TSARATTEA	Carbonic anhydrase 14 OS=Mus musculus OX=10090 GN=Ca14 PE=1 SV=1	Ca14	12603432	9	7.10049	865	54.5397
SVVRYVQL	U6 snRNA-associated Sm-like protein LSm2 OS=Mus musculus OX=10090 GN=Lsm2 PE=1 SV=1	Lsm2	12574120	8	7.09948	864	54.4767
RIATKDRKTVL	Trifunctional enzyme subunit alpha, mitochondrial OS=Mus musculus OX=10090 GN=Hadha PE=1 SV=1	Hadha	12489758	11	7.09655	863	54.4136
PFFSPALVSGLP	Aldehyde dehydrogenase family 16 member A1 OS=Mus musculus OX=10090 GN=Aldh16a1 PE=1 SV=2	Aldh16a1	12476097	12	7.09608	862	54.3506
WQQGQFWGQKP	Heterogeneous nuclear ribonucleoprotein U OS=Mus musculus OX=10090 GN=Hnrnpu PE=1 SV=1	Hnrnpu	12412993	11	7.09388	861	54.2875
LAGFFQRV	Transmembrane protein 214 OS=Mus musculus OX=10090 GN=Tmem214 PE=1 SV=1	Tmem214	12403667	8	7.09355	860	54.2245
ITEFSDITR	Lamina-associated polypeptide 2, isoforms beta/delta/epsilon/gamma OS=Mus musculus OX=10090 GN=Tmpo PE=1 SV=4	Tmpo	12396767	9	7.09331	859	54.1614
TDDRREGMTAF	Enoyl-CoA hydratase, mitochondrial OS=Mus musculus OX=10090 GN=Echs1 PE=1 SV=1	Echs1	12380411	11	7.09274	858	54.0984
GIQEHIDLGIK	60S ribosomal protein L11 OS=Mus musculus OX=10090 GN=Rpl11 PE=1 SV=4	Rpl11	12344752	11	7.09148	857	54.0353
FSPLNPVRV	Heterogeneous nuclear ribonucleoprotein H OS=Mus musculus OX=10090 GN=Hnrnph1 PE=1 SV=3;Heterogeneous nuclear ribonucleoprotein F OS=Mus musculus OX=10090 GN=Hnrnpf PE=1 SV=3	Hnrnph1	12344294	9	7.09147	856	53.9723
HTFEEPTYVKVK	Cytochrome c oxidase subunit 1 OS=Mus musculus OX=10090 GN=Mtco1 PE=1 SV=2	Mtco1	12328667	12	7.09092	855	53.9092
KKLDLSII	Desmoglein-2 OS=Mus musculus OX=10090 GN=Dsg2 PE=1 SV=3	Dsg2	12328480	8	7.09091	854	53.8462
FGDSRGGGGNF	Heterogeneous nuclear ribonucleoproteins A2/B1 OS=Mus musculus OX=10090 GN=Hnrnpa2b1 PE=1 SV=2	Hnrnpa2b1	12324212	11	7.09076	853	53.7831
HLQTGNLLNW	Glutamate--cysteine ligase regulatory subunit OS=Mus musculus OX=10090 GN=Gclm PE=1 SV=1	Gclm	12309794	10	7.09025	852	53.7201
ITPLNKDHI	Nuclear pore complex protein Nup155 OS=Mus musculus OX=10090 GN=Nup155 PE=1 SV=1	Nup155	12279919	9	7.0892	851	53.657
TTLRNGEVL	Transmembrane protein 135 OS=Mus musculus OX=10090 GN=Tmem135 PE=2 SV=1	Tmem135	12260429	9	7.08851	850	53.5939
NPYEVLNLDPGA	Translocation protein SEC63 homolog OS=Mus musculus OX=10090 GN=Sec63 PE=1 SV=4	Sec63	1.22494e+07	12	7.08811	849	53.5309
LDLAKLNQVA	Poly(rC)-binding protein 1 OS=Mus musculus OX=10090 GN=Pcbp1 PE=1 SV=1	Pcbp1	12233324	10	7.08754	848	53.4678
FLKSGDAAIVD	Elongation factor 1-alpha 1 OS=Mus musculus OX=10090 GN=Eef1a1 PE=1 SV=3	Eef1a1	12224830	11	7.08724	847	53.4048
GGGGGGGRYY	Heterogeneous nuclear ribonucleoprotein L OS=Mus musculus OX=10090 GN=Hnrnpl PE=1 SV=2	Hnrnpl	12197824	10	7.08628	846	53.3417
SLEDPQTHSNR	Heat shock protein HSP 90-beta OS=Mus musculus OX=10090 GN=Hsp90ab1 PE=1 SV=3	Hsp90ab1	12171473	11	7.08534	845	53.2787
AALRPLVKPKIV	60S ribosomal protein L32 OS=Mus musculus OX=10090 GN=Rpl32 PE=1 SV=2	Rpl32	12160071	12	7.08494	844	53.2156
TKAPKIQRL	40S ribosomal protein S6 OS=Mus musculus OX=10090 GN=Rps6 PE=1 SV=1	Rps6	12128003	9	7.08379	843	53.1526
YAGSNFPEHI	Actin-related protein 2 OS=Mus musculus OX=10090 GN=Actr2 PE=1 SV=1	Actr2	12123710	10	7.08364	842	53.0895
QAPQNKITV	L-lactate dehydrogenase A chain OS=Mus musculus OX=10090 GN=Ldha PE=1 SV=3	Ldha	12093587	9	7.08256	841	53.0265
KAGAVLGR	Plexin-A4 OS=Mus musculus OX=10090 GN=Plxna4 PE=1 SV=3	Plxna4	12040448	8	7.08064	840	52.9634
RVAPEEHPVLL	Actin, cytoplasmic 1 OS=Mus musculus OX=10090 GN=Actb PE=1 SV=1	Actb	1.2025e+07	11	7.08008	839	52.9004
AAPARLESFF	Ankyrin repeat domain-containing protein 11 OS=Mus musculus OX=10090 GN=Ankrd11 PE=1 SV=1	Ankrd11	12017359	10	7.07981	838	52.8373
NAPQNPESKL	GON-4-like protein OS=Mus musculus OX=10090 GN=Gon4l PE=1 SV=3	Gon4l	11971636	10	7.07815	837	52.7743
ILFPRKPSAPK	60S ribosomal protein L13 OS=Mus musculus OX=10090 GN=Rpl13 PE=1 SV=3	Rpl13	11962153	11	7.07781	836	52.7112
DAREAIIP	Regulator of nonsense transcripts 1 OS=Mus musculus OX=10090 GN=Upf1 PE=1 SV=2	Upf1	11950235	8	7.07738	835	52.6482
GVIKVFNDM	Cofilin-1 OS=Mus musculus OX=10090 GN=Cfl1 PE=1 SV=3	Cfl1	11933850	9	7.07678	834	52.5851
SSSLNQEKI	Protein TASOR 2 OS=Mus musculus OX=10090 GN=Tasor2 PE=1 SV=2	Tasor2	11918006	9	7.0762	833	52.5221
KLTRDETNY	Receptor of activated protein C kinase 1 OS=Mus musculus OX=10090 GN=Rack1 PE=1 SV=3	Rack1	11907745	9	7.07583	832	52.459
SFAPVTKL	Meiosis regulator and mRNA stability factor 1 OS=Mus musculus OX=10090 GN=Marf1 PE=1 SV=3	Marf1	11900164	8	7.07555	831	52.396
KKAVLKGVHSH	60S ribosomal protein L23a OS=Mus musculus OX=10090 GN=Rpl23a PE=1 SV=1	Rpl23a	11887497	11	7.07509	830	52.3329
DVNAAIATIKTK	Tubulin alpha-1A chain OS=Mus musculus OX=10090 GN=Tuba1a PE=1 SV=1;Tubulin alpha-1C chain OS=Mus musculus OX=10090 GN=Tuba1c PE=1 SV=1	Tuba1a	11885480	12	7.07502	829	52.2699
RGTDDDRPSW	Eukaryotic translation initiation factor 3 subunit A OS=Mus musculus OX=10090 GN=Eif3a PE=1 SV=5	Eif3a	1.18365e+07	10	7.07322	828	52.2068
FSEENHEPL	Vacuolar protein sorting-associated protein 35 OS=Mus musculus OX=10090 GN=Vps35 PE=1 SV=1	Vps35	11829554	9	7.07297	827	52.1438
SHTETSSFLQTL	Dedicator of cytokinesis protein 7 OS=Mus musculus OX=10090 GN=Dock7 PE=1 SV=3	Dock7	11824321	12	7.07278	826	52.0807
RVETGVLKP	Elongation factor 1-alpha 1 OS=Mus musculus OX=10090 GN=Eef1a1 PE=1 SV=3	Eef1a1	11781028	9	7.07118	825	52.0177
RLVGALSV	Nesprin-2 OS=Mus musculus OX=10090 GN=Syne2 PE=1 SV=2	Syne2	11779950	8	7.07114	824	51.9546
YQLQLQAASNF	Casein kinase II subunit beta OS=Mus musculus OX=10090 GN=Csnk2b PE=1 SV=1	Csnk2b	11762858	11	7.07051	823	51.8916
VSPTGTHTL	Progranulin OS=Mus musculus OX=10090 GN=Grn PE=1 SV=2	Grn	11745186	9	7.06986	822	51.8285
SIAKEGFEKISK	60 kDa heat shock protein, mitochondrial OS=Mus musculus OX=10090 GN=Hspd1 PE=1 SV=1	Hspd1	11686900	12	7.0677	821	51.7654
GFDYKERL	Src substrate cortactin OS=Mus musculus OX=10090 GN=Cttn PE=1 SV=2	Cttn	11681031	8	7.06748	820	51.7024
IKDGLIIRKP	60S ribosomal protein L19 OS=Mus musculus OX=10090 GN=Rpl19 PE=1 SV=1	Rpl19	11666149	10	7.06693	819	51.6393
KKTKEAVQLL	60S ribosomal protein L4 OS=Mus musculus OX=10090 GN=Rpl4 PE=1 SV=3	Rpl4	11566528	10	7.0632	818	51.5763
VADKFTEL	Serine/threonine-protein phosphatase 2A 65 kDa regulatory subunit A alpha isoform OS=Mus musculus OX=10090 GN=Ppp2r1a PE=1 SV=3	Ppp2r1a	11564410	8	7.06312	817	51.5132
SQIVNPESI	Pentatricopeptide repeat-containing protein 2, mitochondrial OS=Mus musculus OX=10090 GN=Ptcd2 PE=1 SV=1	Ptcd2	11564073	9	7.06311	816	51.4502
AAIKLQELL	Ribosome-binding protein 1 OS=Mus musculus OX=10090 GN=Rrbp1 PE=1 SV=2	Rrbp1	11561800	9	7.06303	815	51.3871
AHILQEISGAY	Stearoyl-CoA desaturase 2 OS=Mus musculus OX=10090 GN=Scd2 PE=1 SV=2	Scd2	11553801	11	7.06272	814	51.3241
RILDPEGLALG	pre-rRNA 2'-O-ribose RNA methyltransferase FTSJ3 OS=Mus musculus OX=10090 GN=Ftsj3 PE=1 SV=1	Ftsj3	11505456	11	7.0609	813	51.261
DHKFDLMY	Tubulin alpha-8 chain OS=Mus musculus OX=10090 GN=Tuba8 PE=1 SV=1;Tubulin alpha chain-like 3 OS=Mus musculus OX=10090 GN=Tubal3 PE=2 SV=2;Tubulin alpha-1A chain OS=Mus musculus OX=10090 GN=Tuba1a PE=1 SV=1;Tubulin alpha-1C chain OS=Mus musculus OX=10090 GN=Tuba1c PE=1 SV=1	Tuba8	11495158	8	7.06051	812	51.198
VIHDNFGIVE	Glyceraldehyde-3-phosphate dehydrogenase OS=Mus musculus OX=10090 GN=Gapdh PE=1 SV=2	Gapdh	11459615	10	7.05917	811	51.1349
ASEGPLKGILG	Glyceraldehyde-3-phosphate dehydrogenase OS=Mus musculus OX=10090 GN=Gapdh PE=1 SV=2	Gapdh	11455133	11	7.059	810	51.0719
TIVEFLHSF	Bromodomain adjacent to zinc finger domain protein 2A OS=Mus musculus OX=10090 GN=Baz2a PE=1 SV=2	Baz2a	11399631	9	7.05689	809	51.0088
VAYGFRNI	Cytosolic iron-sulfur assembly component 3 OS=Mus musculus OX=10090 GN=Ciao3 PE=1 SV=2	Ciao3	11394863	8	7.05671	808	50.9458
NPVLVRGIGRY	60S ribosomal protein L6 OS=Mus musculus OX=10090 GN=Rpl6 PE=1 SV=3	Rpl6	11324080	11	7.054	807	50.8827
RDLDAPDDVDFF	Serrate RNA effector molecule homolog OS=Mus musculus OX=10090 GN=Srrt PE=1 SV=1	Srrt	11279170	12	7.05228	806	50.8197
SSGSIKNGNNF	Protein HEG homolog 1 OS=Mus musculus OX=10090 GN=Heg1 PE=1 SV=1	Heg1	11279032	11	7.05227	805	50.7566
EIIKRTGIPTLG	Bifunctional methylenetetrahydrofolate dehydrogenase/cyclohydrolase, mitochondrial OS=Mus musculus OX=10090 GN=Mthfd2 PE=1 SV=1	Mthfd2	11267314	12	7.05182	804	50.6936
AILGDHPSSF	Heterogeneous nuclear ribonucleoprotein L-like OS=Mus musculus OX=10090 GN=Hnrnpll PE=1 SV=3	Hnrnpll	11265237	10	7.05174	803	50.6305
VNVDLAFST	Rho GTPase-activating protein 35 OS=Mus musculus OX=10090 GN=Arhgap35 PE=1 SV=3	Arhgap35	11259099	9	7.0515	802	50.5675
FMATNPEHL	ER degradation-enhancing alpha-mannosidase-like protein 3 OS=Mus musculus OX=10090 GN=Edem3 PE=1 SV=2	Edem3	11243597	9	7.05091	801	50.5044
KLEFSIYPAPQ	Tubulin alpha-1A chain OS=Mus musculus OX=10090 GN=Tuba1a PE=1 SV=1;Tubulin alpha-1C chain OS=Mus musculus OX=10090 GN=Tuba1c PE=1 SV=1	Tuba1a	11237254	11	7.05066	800	50.4414
GNFGFGDSR	Heterogeneous nuclear ribonucleoproteins A2/B1 OS=Mus musculus OX=10090 GN=Hnrnpa2b1 PE=1 SV=2	Hnrnpa2b1	11227005	9	7.05026	799	50.3783
RSSVPGVRLLQ	Vimentin OS=Mus musculus OX=10090 GN=Vim PE=1 SV=3	Vim	11194759	11	7.04901	798	50.3153
RYITPDQLADL	Alpha-enolase OS=Mus musculus OX=10090 GN=Eno1 PE=1 SV=3	Eno1	11187293	11	7.04873	797	50.2522
SVVPSPKVSD	Tubulin beta-3 chain OS=Mus musculus OX=10090 GN=Tubb3 PE=1 SV=1;Tubulin beta-5 chain OS=Mus musculus OX=10090 GN=Tubb5 PE=1 SV=1;Tubulin beta-4B chain OS=Mus musculus OX=10090 GN=Tubb4b PE=1 SV=1	Tubb3	11151280	10	7.04732	796	50.1892
QDAVDIHYP	E3 ubiquitin-protein ligase COP1 OS=Mus musculus OX=10090 GN=Cop1 PE=1 SV=2	Cop1	11145918	9	7.04712	795	50.1261
FEYIEENKY	Heterogeneous nuclear ribonucleoprotein U OS=Mus musculus OX=10090 GN=Hnrnpu PE=1 SV=1	Hnrnpu	11124981	9	7.0463	794	50.0631
SLEDAHHVP	Histone-lysine N-methyltransferase 2B OS=Mus musculus OX=10090 GN=Kmt2b PE=1 SV=3	Kmt2b	11109150	9	7.04568	793	50
KSGDAAIVDMVP	Elongation factor 1-alpha 1 OS=Mus musculus OX=10090 GN=Eef1a1 PE=1 SV=3	Eef1a1	11093782	12	7.04508	792	49.9369
GQVINLDQL	Protein FAM91A1 OS=Mus musculus OX=10090 GN=Fam91a1 PE=1 SV=1	Fam91a1	11086496	9	7.04479	791	49.8739
LFRNITVDD	Phosphoribosyl pyrophosphate synthase-associated protein 1 OS=Mus musculus OX=10090 GN=Prpsap1 PE=1 SV=1	Prpsap1	11080921	9	7.04458	790	49.8108
LDHKFDLMY	Tubulin alpha-8 chain OS=Mus musculus OX=10090 GN=Tuba8 PE=1 SV=1;Tubulin alpha chain-like 3 OS=Mus musculus OX=10090 GN=Tubal3 PE=2 SV=2;Tubulin alpha-1A chain OS=Mus musculus OX=10090 GN=Tuba1a PE=1 SV=1;Tubulin alpha-1C chain OS=Mus musculus OX=10090 GN=Tuba1c PE=1 SV=1	Tuba8	1.1062e+07	9	7.04384	789	49.7478
TVIDEVRTGTYR	Tubulin alpha-1A chain OS=Mus musculus OX=10090 GN=Tuba1a PE=1 SV=1;Tubulin alpha-1C chain OS=Mus musculus OX=10090 GN=Tuba1c PE=1 SV=1	Tuba1a	11023298	12	7.04231	788	49.6847
KLEPQIATASEY	Perilipin-3 OS=Mus musculus OX=10090 GN=Plin3 PE=1 SV=1	Plin3	11007845	12	7.0417	787	49.6217
GLVMDRMGSVE	Heterogeneous nuclear ribonucleoprotein M OS=Mus musculus OX=10090 GN=Hnrnpm PE=1 SV=3	Hnrnpm	10999690	11	7.04138	786	49.5586
LQYEFTKL	Formin-like protein 2 OS=Mus musculus OX=10090 GN=Fmnl2 PE=1 SV=2	Fmnl2	10992617	8	7.0411	785	49.4956
RGGGGDFKP	Nucleolin OS=Mus musculus OX=10090 GN=Ncl PE=1 SV=2	Ncl	10988514	9	7.04094	784	49.4325
VVKVANVSLLA	40S ribosomal protein S23 OS=Mus musculus OX=10090 GN=Rps23 PE=1 SV=3	Rps23	10976541	11	7.04047	783	49.3695
LDLTKSLNDLG	Cordon-bleu protein-like 1 OS=Mus musculus OX=10090 GN=Cobll1 PE=1 SV=2	Cobll1	10974459	11	7.04038	782	49.3064
SELARHTR	Adhesion G protein-coupled receptor L1 OS=Mus musculus OX=10090 GN=Adgrl1 PE=1 SV=2	Adgrl1	10967501	8	7.04011	781	49.2434
ILGDHPSSF	Heterogeneous nuclear ribonucleoprotein L-like OS=Mus musculus OX=10090 GN=Hnrnpll PE=1 SV=3	Hnrnpll	10956122	9	7.03966	780	49.1803
VNDIFERI	Histone H2B type 1-B OS=Mus musculus OX=10090 GN=H2bc3 PE=1 SV=3;Histone H2B type 1-F/J/L OS=Mus musculus OX=10090 GN=H2bc7 PE=1 SV=2	H2bc3	10939136	8	7.03898	779	49.1173
GRTVIIEQSW	60 kDa heat shock protein, mitochondrial OS=Mus musculus OX=10090 GN=Hspd1 PE=1 SV=1	Hspd1	10929887	10	7.03862	778	49.0542
AITAIKGVGRRY	40S ribosomal protein S18 OS=Mus musculus OX=10090 GN=Rps18 PE=1 SV=3	Rps18	10928622	12	7.03857	777	48.9912
KEAFVQSISLS	Aldehyde oxidase 3 OS=Mus musculus OX=10090 GN=Aox3 PE=1 SV=1	Aox3	10887933	11	7.03695	776	48.9281
ITFIFKSL	Serine/threonine-protein kinase mTOR OS=Mus musculus OX=10090 GN=Mtor PE=1 SV=2	Mtor	10879186	8	7.0366	775	48.8651
TGPVMPIR	60S ribosomal protein L13 OS=Mus musculus OX=10090 GN=Rpl13 PE=1 SV=3	Rpl13	10862155	8	7.03592	774	48.802
RSIDEHDAII	Porimin OS=Mus musculus OX=10090 GN=Tmem123 PE=1 SV=1	Tmem123	10852673	10	7.03554	773	48.739
VGLFLGIIT	Transmembrane protein 255A OS=Mus musculus OX=10090 GN=Tmem255a PE=1 SV=1	Tmem255a	10847407	9	7.03533	772	48.6759
SIQGQHTISPL	Poly(rC)-binding protein 1 OS=Mus musculus OX=10090 GN=Pcbp1 PE=1 SV=1	Pcbp1	10844919	11	7.03523	771	48.6129
LLDVVHPAAK	T-complex protein 1 subunit eta OS=Mus musculus OX=10090 GN=Cct7 PE=1 SV=1	Cct7	10836265	10	7.03488	770	48.5498
TDLFGRDLSY	Heterogeneous nuclear ribonucleoprotein F OS=Mus musculus OX=10090 GN=Hnrnpf PE=1 SV=3	Hnrnpf	10818800	10	7.03418	769	48.4868
GDGIARVH	ATP synthase subunit alpha, mitochondrial OS=Mus musculus OX=10090 GN=Atp5f1a PE=1 SV=1	Atp5f1a	10780126	8	7.03262	768	48.4237
YQTGKDISTNY	Endoplasmin OS=Mus musculus OX=10090 GN=Hsp90b1 PE=1 SV=2	Hsp90b1	10761459	11	7.03187	767	48.3607
RQMQLENV	Filamin-A OS=Mus musculus OX=10090 GN=Flna PE=1 SV=5	Flna	10749600	8	7.03139	766	48.2976
FSVTNPHTM	Ligand-dependent nuclear receptor-interacting factor 1 OS=Mus musculus OX=10090 GN=Lrif1 PE=1 SV=2	Lrif1	10723349	9	7.03033	765	48.2346
VREEYPDRIM	Tubulin beta-3 chain OS=Mus musculus OX=10090 GN=Tubb3 PE=1 SV=1	Tubb3	10722250	10	7.03029	764	48.1715
SNYVAPAAP	Mitogen-activated protein kinase kinase kinase 10 OS=Mus musculus OX=10090 GN=Map3k10 PE=1 SV=2	Map3k10	10673217	9	7.0283	763	48.1084
GGWDSRDDFNSG	Eukaryotic translation initiation factor 4H OS=Mus musculus OX=10090 GN=Eif4h PE=1 SV=3	Eif4h	10667193	12	7.02805	762	48.0454
EVFKTASQP	Focadhesin OS=Mus musculus OX=10090 GN=Focad PE=1 SV=1	Focad	10665528	9	7.02798	761	47.9823
GIVLEKVGVEAK	40S ribosomal protein S23 OS=Mus musculus OX=10090 GN=Rps23 PE=1 SV=3	Rps23	10654781	12	7.02754	760	47.9193
FHEEDETSF	Eukaryotic translation initiation factor 3 subunit D OS=Mus musculus OX=10090 GN=Eif3d PE=1 SV=2	Eif3d	10608091	9	7.02564	759	47.8562
VRSGPFGQIFRP	Tubulin beta-5 chain OS=Mus musculus OX=10090 GN=Tubb5 PE=1 SV=1;Tubulin beta-4B chain OS=Mus musculus OX=10090 GN=Tubb4b PE=1 SV=1;Tubulin beta-6 chain OS=Mus musculus OX=10090 GN=Tubb6 PE=1 SV=1	Tubb5	10600843	12	7.02534	758	47.7932
ANFSFRNTL	Tyrosinase OS=Mus musculus OX=10090 GN=Tyr PE=1 SV=3	Tyr	10595389	9	7.02512	757	47.7301
SNYQHITNF	AP-3 complex subunit delta-1 OS=Mus musculus OX=10090 GN=Ap3d1 PE=1 SV=1	Ap3d1	10585457	9	7.02471	756	47.6671
ILSGVVTK	40S ribosomal protein S11 OS=Mus musculus OX=10090 GN=Rps11 PE=1 SV=3	Rps11	10581864	8	7.02456	755	47.604
FHVQNIDLL	ATPase family AAA domain-containing protein 5 OS=Mus musculus OX=10090 GN=Atad5 PE=1 SV=1	Atad5	10567261	9	7.02396	754	47.541
KLEFSIYP	Tubulin alpha-1A chain OS=Mus musculus OX=10090 GN=Tuba1a PE=1 SV=1;Tubulin alpha-1C chain OS=Mus musculus OX=10090 GN=Tuba1c PE=1 SV=1	Tuba1a	10544071	8	7.02301	753	47.4779
REIFDSRGNP	Alpha-enolase OS=Mus musculus OX=10090 GN=Eno1 PE=1 SV=3	Eno1	1.05421e+07	10	7.02293	752	47.4149
QEYDESGPSIVH	Actin, cytoplasmic 1 OS=Mus musculus OX=10090 GN=Actb PE=1 SV=1	Actb	10540290	12	7.02285	751	47.3518
GGSGGSGGYGGR	Heterogeneous nuclear ribonucleoproteins A2/B1 OS=Mus musculus OX=10090 GN=Hnrnpa2b1 PE=1 SV=2	Hnrnpa2b1	10528993	12	7.02239	750	47.2888
VDGPSGKLWR	Glyceraldehyde-3-phosphate dehydrogenase OS=Mus musculus OX=10090 GN=Gapdh PE=1 SV=2	Gapdh	10512575	10	7.02171	749	47.2257
REWDDWKDTHP	Immunoglobulin-binding protein 1 OS=Mus musculus OX=10090 GN=Igbp1 PE=1 SV=1	Igbp1	10504479	11	7.02137	748	47.1627
KSISNPPGSNL	Serine/threonine-protein kinase WNK1 OS=Mus musculus OX=10090 GN=Wnk1 PE=1 SV=2	Wnk1	10497975	11	7.02111	747	47.0996
SSIQNGKYTL	Lysine-specific demethylase 7A OS=Mus musculus OX=10090 GN=Kdm7a PE=2 SV=2	Kdm7a	10469940	10	7.01994	746	47.0366
SMSADVPLVVE	Proliferating cell nuclear antigen OS=Mus musculus OX=10090 GN=Pcna PE=1 SV=2	Pcna	10460449	11	7.01955	745	46.9735
AVGKVIPEL	Glyceraldehyde-3-phosphate dehydrogenase OS=Mus musculus OX=10090 GN=Gapdh PE=1 SV=2	Gapdh	10452239	9	7.01921	744	46.9105
SSILLIDKV	Synaptopodin OS=Mus musculus OX=10090 GN=Synpo PE=1 SV=2	Synpo	10416855	9	7.01774	743	46.8474
YMDASLISL	Peroxisome proliferator-activated receptor gamma coactivator-related protein 1 OS=Mus musculus OX=10090 GN=Pprc1 PE=1 SV=1	Pprc1	10409120	9	7.01741	742	46.7844
KIEDNNTLVF	60S ribosomal protein L23a OS=Mus musculus OX=10090 GN=Rpl23a PE=1 SV=1	Rpl23a	10403719	10	7.01719	741	46.7213
RLGAAPEEESAY	NSFL1 cofactor p47 OS=Mus musculus OX=10090 GN=Nsfl1c PE=1 SV=1	Nsfl1c	10401121	12	7.01708	740	46.6583
LISIPGKDPDSP	Transmembrane glycoprotein NMB OS=Mus musculus OX=10090 GN=Gpnmb PE=1 SV=2	Gpnmb	10400314	12	7.01705	739	46.5952
KGPEADSEW	Eukaryotic translation initiation factor 3 subunit A OS=Mus musculus OX=10090 GN=Eif3a PE=1 SV=5	Eif3a	10382516	9	7.0163	738	46.5322
SAALNKDFL	Centrosome-associated protein 350 OS=Mus musculus OX=10090 GN=Cep350 PE=1 SV=1	Cep350	10352538	9	7.01505	737	46.4691
GGGGNYNDFGNY	Heterogeneous nuclear ribonucleoprotein A3 OS=Mus musculus OX=10090 GN=Hnrnpa3 PE=1 SV=1	Hnrnpa3	10341773	12	7.0146	736	46.4061
DLLLTFPSCQPP	Methionine synthase reductase OS=Mus musculus OX=10090 GN=Mtrr PE=1 SV=2	Mtrr	10340754	12	7.01455	735	46.343
TAIENSWIHL	RNA N6-adenosine-methyltransferase METTL16 OS=Mus musculus OX=10090 GN=Mettl16 PE=1 SV=1	Mettl16	10323701	10	7.01384	734	46.2799
AAVIDQERL	Serine/threonine-protein kinase MRCK gamma OS=Mus musculus OX=10090 GN=Cdc42bpg PE=1 SV=2	Cdc42bpg	10316808	9	7.01355	733	46.2169
TPTYGDLNHLVS	Tubulin beta-3 chain OS=Mus musculus OX=10090 GN=Tubb3 PE=1 SV=1;Tubulin beta-5 chain OS=Mus musculus OX=10090 GN=Tubb5 PE=1 SV=1;Tubulin beta-4B chain OS=Mus musculus OX=10090 GN=Tubb4b PE=1 SV=1;Tubulin beta-6 chain OS=Mus musculus OX=10090 GN=Tubb6 PE=1 SV=1	Tubb3	10316187	12	7.01352	732	46.1538
TINKAWVESR	Calcyclin-binding protein OS=Mus musculus OX=10090 GN=Cacybp PE=1 SV=1	Cacybp	10289565	10	7.0124	731	46.0908
LLDLSPEEKSH	5,6-dihydroxyindole-2-carboxylic acid oxidase OS=Mus musculus OX=10090 GN=Tyrp1 PE=1 SV=1	Tyrp1	10266520	11	7.01142	730	46.0277
GSGRGFGDGY	Heterogeneous nuclear ribonucleoproteins A2/B1 OS=Mus musculus OX=10090 GN=Hnrnpa2b1 PE=1 SV=2	Hnrnpa2b1	10259766	10	7.01114	729	45.9647
LTPEEEEILNK	40S ribosomal protein S8 OS=Mus musculus OX=10090 GN=Rps8 PE=1 SV=2	Rps8	10259212	11	7.01111	728	45.9016
AFIAHPKLGK	60S ribosomal protein L29 OS=Mus musculus OX=10090 GN=Rpl29 PE=1 SV=2	Rpl29	10258088	10	7.01107	727	45.8386
LIDLHSPSEIVK	40S ribosomal protein S20 OS=Mus musculus OX=10090 GN=Rps20 PE=1 SV=1	Rps20	10251418	12	7.01078	726	45.7755
VNVERVLNV	Probable helicase with zinc finger domain OS=Mus musculus OX=10090 GN=Helz PE=1 SV=2	Helz	10240326	9	7.01031	725	45.7125
IDPTKVVR	60 kDa heat shock protein, mitochondrial OS=Mus musculus OX=10090 GN=Hspd1 PE=1 SV=1	Hspd1	10213199	8	7.00916	724	45.6494
RGLDDDRGPW	Eukaryotic translation initiation factor 3 subunit A OS=Mus musculus OX=10090 GN=Eif3a PE=1 SV=5	Eif3a	10188110	10	7.00809	723	45.5864
GIGQDIQPK	60S ribosomal protein L7a OS=Mus musculus OX=10090 GN=Rpl7a PE=1 SV=2	Rpl7a	10185892	9	7.008	722	45.5233
SPSWAEQPR	Killer cell lectin-like receptor subfamily G member 2 OS=Mus musculus OX=10090 GN=Klrg2 PE=1 SV=1	Klrg2	10165474	9	7.00713	721	45.4603
LLLPGELAK	Histone H2B type 1-B OS=Mus musculus OX=10090 GN=H2bc3 PE=1 SV=3;Histone H2B type 1-F/J/L OS=Mus musculus OX=10090 GN=H2bc7 PE=1 SV=2	H2bc3	10165100	9	7.00711	720	45.3972
SAMTSGVQSVM	Perilipin-3 OS=Mus musculus OX=10090 GN=Plin3 PE=1 SV=1	Plin3	10153821	11	7.00663	719	45.3342
IHAREIFDSR	Alpha-enolase OS=Mus musculus OX=10090 GN=Eno1 PE=1 SV=3	Eno1	10149875	10	7.00646	718	45.2711
SWASVTSK	Ras GTPase-activating protein-binding protein 1 OS=Mus musculus OX=10090 GN=G3bp1 PE=1 SV=1	G3bp1	10137466	8	7.00593	717	45.2081
SGDAAIVDMVP	Elongation factor 1-alpha 1 OS=Mus musculus OX=10090 GN=Eef1a1 PE=1 SV=3	Eef1a1	10122924	11	7.00531	716	45.145
NVVKIQKHVTF	Tryptophan--tRNA ligase, cytoplasmic OS=Mus musculus OX=10090 GN=Wars1 PE=1 SV=2	Wars1	10098012	11	7.00424	715	45.082
FVSAGIQTSF	Probable ATP-dependent RNA helicase DDX5 OS=Mus musculus OX=10090 GN=Ddx5 PE=1 SV=2	Ddx5	10092716	10	7.00401	714	45.0189
KEITALAPSTM	Actin, cytoplasmic 1 OS=Mus musculus OX=10090 GN=Actb PE=1 SV=1;Actin, alpha cardiac muscle 1 OS=Mus musculus OX=10090 GN=Actc1 PE=1 SV=1	Actb	10087996	11	7.0038	713	44.9559
FSVENKWRL	Cytochrome c oxidase subunit 7C, mitochondrial OS=Mus musculus OX=10090 GN=Cox7c PE=1 SV=1	Cox7c	10071498	9	7.00309	712	44.8928
RFQTMEEKKAF	60S ribosomal protein L3 OS=Mus musculus OX=10090 GN=Rpl3 PE=1 SV=3	Rpl3	10052220	11	7.00226	711	44.8298
ALVKPQAIKP	60S ribosomal protein L29 OS=Mus musculus OX=10090 GN=Rpl29 PE=1 SV=2	Rpl29	10050593	10	7.00219	710	44.7667
SAPVAAEPF	2-oxoglutarate dehydrogenase, mitochondrial OS=Mus musculus OX=10090 GN=Ogdh PE=1 SV=3	Ogdh	10049735	9	7.00215	709	44.7037
LKKEGPDF	Cytochrome c oxidase subunit NDUFA4 OS=Mus musculus OX=10090 GN=Ndufa4 PE=1 SV=2	Ndufa4	10040811	8	7.00177	708	44.6406
KAVENYLIQM	Programmed cell death protein 5 OS=Mus musculus OX=10090 GN=Pdcd5 PE=1 SV=3	Pdcd5	10040549	10	7.00176	707	44.5776
HAPGKGLSQ	40S ribosomal protein S13 OS=Mus musculus OX=10090 GN=Rps13 PE=1 SV=2	Rps13	10032668	9	7.00142	706	44.5145
QLVINQEAL	Guanylate-binding protein 2 OS=Mus musculus OX=10090 GN=Gbp2 PE=1 SV=1	Gbp2	10023710	9	7.00103	705	44.4515
NHPGQISAGYAP	Elongation factor 1-alpha 1 OS=Mus musculus OX=10090 GN=Eef1a1 PE=1 SV=3	Eef1a1	10010236	12	7.00044	704	44.3884
VQPINQHVL	Golgin-45 OS=Mus musculus OX=10090 GN=Blzf1 PE=1 SV=2	Blzf1	10009768	9	7.00042	703	44.3253
AIMENANVL	Fructose-bisphosphate aldolase A OS=Mus musculus OX=10090 GN=Aldoa PE=1 SV=2	Aldoa	9966497	9	6.99854	702	44.2623
TSRGSQQY	Tubulin beta-5 chain OS=Mus musculus OX=10090 GN=Tubb5 PE=1 SV=1;Tubulin beta-4B chain OS=Mus musculus OX=10090 GN=Tubb4b PE=1 SV=1	Tubb5	9929649	8	6.99693	701	44.1992
RGIKKITSTAL	Ribosomal protein S6 kinase alpha-3 OS=Mus musculus OX=10090 GN=Rps6ka3 PE=1 SV=2	Rps6ka3	9927763	11	6.99685	700	44.1362
KAIVNVIGM	Splicing factor 3B subunit 1 OS=Mus musculus OX=10090 GN=Sf3b1 PE=1 SV=1	Sf3b1	9.92655e+06	9	6.9968	699	44.0731
GDLNHLVSATM	Tubulin beta-3 chain OS=Mus musculus OX=10090 GN=Tubb3 PE=1 SV=1;Tubulin beta-5 chain OS=Mus musculus OX=10090 GN=Tubb5 PE=1 SV=1;Tubulin beta-4B chain OS=Mus musculus OX=10090 GN=Tubb4b PE=1 SV=1;Tubulin beta-6 chain OS=Mus musculus OX=10090 GN=Tubb6 PE=1 SV=1	Tubb3	9904967	11	6.99585	698	44.0101
SLFGPDLIPVT	HSPB1-associated protein 1 OS=Mus musculus OX=10090 GN=Hspbap1 PE=1 SV=2	Hspbap1	9862396	11	6.99398	697	43.947
VSSLITTDM	DNA cross-link repair 1A protein OS=Mus musculus OX=10090 GN=Dclre1a PE=1 SV=2	Dclre1a	9861799	9	6.99396	696	43.884
VGINYREV	DNA topoisomerase 2-alpha OS=Mus musculus OX=10090 GN=Top2a PE=1 SV=2	Top2a	9830534	8	6.99258	695	43.8209
VITEEEKNFK	60S ribosomal protein L13 OS=Mus musculus OX=10090 GN=Rpl13 PE=1 SV=3	Rpl13	9822344	10	6.99222	694	43.7579
RSLRFVTL	Lysosomal acid phosphatase OS=Mus musculus OX=10090 GN=Acp2 PE=1 SV=2	Acp2	9811428	8	6.99173	693	43.6948
YKVDENGKISRL	Ubiquitin-40S ribosomal protein S27a OS=Mus musculus OX=10090 GN=Rps27a PE=1 SV=2	Rps27a	9800215	12	6.99124	692	43.6318
LDIERPTY	Tubulin alpha-8 chain OS=Mus musculus OX=10090 GN=Tuba8 PE=1 SV=1;Tubulin alpha-1A chain OS=Mus musculus OX=10090 GN=Tuba1a PE=1 SV=1;Tubulin alpha-1C chain OS=Mus musculus OX=10090 GN=Tuba1c PE=1 SV=1	Tuba8	9783354	8	6.99049	691	43.5687
GRLAHEVGW	60S ribosomal protein L13a OS=Mus musculus OX=10090 GN=Rpl13a PE=1 SV=4	Rpl13a	9782344	9	6.99044	690	43.5057
YHPGVNGPPL	Serine/threonine-protein phosphatase 1 regulatory subunit 10 OS=Mus musculus OX=10090 GN=Ppp1r10 PE=1 SV=1	Ppp1r10	9778782	10	6.99028	689	43.4426
VGKYGTRY	60S ribosomal protein L37a OS=Mus musculus OX=10090 GN=Rpl37a PE=1 SV=2	Rpl37a	9772441	8	6.99	688	43.3796
LRVVGSELIQK	26S proteasome regulatory subunit 4 OS=Mus musculus OX=10090 GN=Psmc1 PE=1 SV=1	Psmc1	9754804	11	6.98922	687	43.3165
KLLDFGSLSNL	40S ribosomal protein S17 OS=Mus musculus OX=10090 GN=Rps17 PE=1 SV=2	Rps17	9751188	11	6.98906	686	43.2535
YQPYNKDWI	Enhancer of rudimentary homolog OS=Mus musculus OX=10090 GN=Erh PE=1 SV=1	Erh	9740964	9	6.9886	685	43.1904
SSIVNSIQVL	Ribosome-binding protein 1 OS=Mus musculus OX=10090 GN=Rrbp1 PE=1 SV=2	Rrbp1	9694452	10	6.98652	684	43.1274
LEDGPKFL	Elongation factor 1-alpha 1 OS=Mus musculus OX=10090 GN=Eef1a1 PE=1 SV=3	Eef1a1	9673214	8	6.98557	683	43.0643
TQIINITMT	Nuclear mitotic apparatus protein 1 OS=Mus musculus OX=10090 GN=Numa1 PE=1 SV=1	Numa1	9637154	9	6.98395	682	43.0013
YKVDENGKISR	Ubiquitin-40S ribosomal protein S27a OS=Mus musculus OX=10090 GN=Rps27a PE=1 SV=2	Rps27a	9610310	11	6.98274	681	42.9382
YIDQEELNK	Heat shock protein HSP 90-alpha OS=Mus musculus OX=10090 GN=Hsp90aa1 PE=1 SV=4;Heat shock protein HSP 90-beta OS=Mus musculus OX=10090 GN=Hsp90ab1 PE=1 SV=3	Hsp90aa1	9595101	9	6.98205	680	42.8752
AQALRDNSTMGY	Heat shock protein HSP 90-alpha OS=Mus musculus OX=10090 GN=Hsp90aa1 PE=1 SV=4;Heat shock protein HSP 90-beta OS=Mus musculus OX=10090 GN=Hsp90ab1 PE=1 SV=3	Hsp90aa1	9589397	12	6.98179	679	42.8121
IGQCLLHGMT	Long-chain fatty acid transport protein 4 OS=Mus musculus OX=10090 GN=Slc27a4 PE=1 SV=1	Slc27a4	9585601	10	6.98162	678	42.7491
AERLASGELRLS	Immunoglobulin superfamily member 8 OS=Mus musculus OX=10090 GN=Igsf8 PE=1 SV=2	Igsf8	9580035	12	6.98137	677	42.686
GALKNIVAV	Glycerol-3-phosphate dehydrogenase 1-like protein OS=Mus musculus OX=10090 GN=Gpd1l PE=1 SV=2	Gpd1l	9577879	9	6.98127	676	42.623
SGIDFKQL	Integrin-linked protein kinase OS=Mus musculus OX=10090 GN=Ilk PE=1 SV=2	Ilk	9568725	8	6.98085	675	42.5599
IALLNSKAL	T-cell-specific guanine nucleotide triphosphate-binding protein 1 OS=Mus musculus OX=10090 GN=Tgtp1 PE=1 SV=1	Tgtp1	9550391	9	6.98002	674	42.4968
SVVAFHNL	Probable C-mannosyltransferase DPY19L3 OS=Mus musculus OX=10090 GN=Dpy19l3 PE=2 SV=2	Dpy19l3	9549576	8	6.97998	673	42.4338
TPNVSVVDLT	Glyceraldehyde-3-phosphate dehydrogenase OS=Mus musculus OX=10090 GN=Gapdh PE=1 SV=2	Gapdh	9536098	10	6.97937	672	42.3707
MREIVHIQA	Tubulin beta-3 chain OS=Mus musculus OX=10090 GN=Tubb3 PE=1 SV=1;Tubulin beta-5 chain OS=Mus musculus OX=10090 GN=Tubb5 PE=1 SV=1;Tubulin beta-4B chain OS=Mus musculus OX=10090 GN=Tubb4b PE=1 SV=1;Tubulin beta-6 chain OS=Mus musculus OX=10090 GN=Tubb6 PE=1 SV=1	Tubb3	9518263	9	6.97856	671	42.3077
VIISAPSADAPM	Glyceraldehyde-3-phosphate dehydrogenase OS=Mus musculus OX=10090 GN=Gapdh PE=1 SV=2	Gapdh	9510194	12	6.97819	670	42.2446
VLVLYDEIKKYT	ADP/ATP translocase 2 OS=Mus musculus OX=10090 GN=Slc25a5 PE=1 SV=3	Slc25a5	9456596	12	6.97573	669	42.1816
READDIVNW	Protein disulfide-isomerase OS=Mus musculus OX=10090 GN=P4hb PE=1 SV=2	P4hb	9450749	9	6.97547	668	42.1185
TAPVQLYK	Hermansky-Pudlak syndrome 3 protein homolog OS=Mus musculus OX=10090 GN=Hps3 PE=2 SV=2	Hps3	9442561	8	6.97509	667	42.0555
TALIHDGLAR	40S ribosomal protein S12 OS=Mus musculus OX=10090 GN=Rps12 PE=1 SV=2	Rps12	9427434	10	6.97439	666	41.9924
SVPGVRLLQ	Vimentin OS=Mus musculus OX=10090 GN=Vim PE=1 SV=3	Vim	9412091	9	6.97369	665	41.9294
SGPPVSELITK	Histone H1.4 OS=Mus musculus OX=10090 GN=H1-4 PE=1 SV=2;Histone H1.2 OS=Mus musculus OX=10090 GN=H1-2 PE=1 SV=2	H1-4	9408038	11	6.9735	664	41.8663
TEDVPRKL	60S ribosomal protein L6 OS=Mus musculus OX=10090 GN=Rpl6 PE=1 SV=3	Rpl6	9397029	8	6.97299	663	41.8033
GRGFGDGY	Heterogeneous nuclear ribonucleoproteins A2/B1 OS=Mus musculus OX=10090 GN=Hnrnpa2b1 PE=1 SV=2	Hnrnpa2b1	9391250	8	6.97272	662	41.7402
ISEQFTAMF	Tubulin beta-3 chain OS=Mus musculus OX=10090 GN=Tubb3 PE=1 SV=1;Tubulin beta-5 chain OS=Mus musculus OX=10090 GN=Tubb5 PE=1 SV=1;Tubulin beta-4B chain OS=Mus musculus OX=10090 GN=Tubb4b PE=1 SV=1	Tubb3	9356135	9	6.9711	661	41.6772
LLGDHPAEY	Heterogeneous nuclear ribonucleoprotein L OS=Mus musculus OX=10090 GN=Hnrnpl PE=1 SV=2	Hnrnpl	9324673	9	6.96963	660	41.6141
GFQNAILVRY	Albumin OS=Mus musculus OX=10090 GN=Alb PE=1 SV=3	Alb	9321688	10	6.96949	659	41.5511
AVSELAGH	60S ribosomal protein L4 OS=Mus musculus OX=10090 GN=Rpl4 PE=1 SV=3	Rpl4	9306527	8	6.96879	658	41.488
VSPRNSLEVL	DDB1- and CUL4-associated factor 10 OS=Mus musculus OX=10090 GN=Dcaf10 PE=1 SV=1	Dcaf10	9293612	10	6.96818	657	41.425
GTQAVLQVFI	Ral GTPase-activating protein subunit alpha-1 OS=Mus musculus OX=10090 GN=Ralgapa1 PE=1 SV=1	Ralgapa1	9292047	10	6.96811	656	41.3619
TNISFTNM	PRELI domain containing protein 3B OS=Mus musculus OX=10090 GN=Prelid3b PE=1 SV=2	Prelid3b	9285649	8	6.96781	655	41.2989
KLEFSIYPAP	Tubulin alpha-1A chain OS=Mus musculus OX=10090 GN=Tuba1a PE=1 SV=1;Tubulin alpha-1C chain OS=Mus musculus OX=10090 GN=Tuba1c PE=1 SV=1	Tuba1a	9233449	10	6.96536	654	41.2358
GNAAQLIAP	AT-rich interactive domain-containing protein 2 OS=Mus musculus OX=10090 GN=Arid2 PE=1 SV=1	Arid2	9232307	9	6.96531	653	41.1728
VNVRFTGV	Ubiquitin carboxyl-terminal hydrolase MINDY-2 OS=Mus musculus OX=10090 GN=Mindy2 PE=1 SV=1	Mindy2	9210292	8	6.96427	652	41.1097
YAIENVETNL	Transportin-3 OS=Mus musculus OX=10090 GN=Tnpo3 PE=1 SV=1	Tnpo3	9205167	10	6.96403	651	41.0467
RIVELISRV	TOM1-like protein 2 OS=Mus musculus OX=10090 GN=Tom1l2 PE=1 SV=1	Tom1l2	9180557	9	6.96287	650	40.9836
NRVVDLMA	Glyceraldehyde-3-phosphate dehydrogenase OS=Mus musculus OX=10090 GN=Gapdh PE=1 SV=2	Gapdh	9176649	8	6.96268	649	40.9206
LMIEMDGTENK	Alpha-enolase OS=Mus musculus OX=10090 GN=Eno1 PE=1 SV=3	Eno1	9166640	11	6.96221	648	40.8575
SAYEVIKL	L-lactate dehydrogenase B chain OS=Mus musculus OX=10090 GN=Ldhb PE=1 SV=2;L-lactate dehydrogenase A chain OS=Mus musculus OX=10090 GN=Ldha PE=1 SV=3	Ldhb	9163708	8	6.96207	647	40.7945
DMRQTVAVGVIK	Elongation factor 1-alpha 1 OS=Mus musculus OX=10090 GN=Eef1a1 PE=1 SV=3	Eef1a1	9162739	12	6.96203	646	40.7314
RALEKIDLK	60S ribosomal protein L3 OS=Mus musculus OX=10090 GN=Rpl3 PE=1 SV=3	Rpl3	9160808	9	6.96193	645	40.6683
TATADDKKLQF	Transcription factor BTF3 OS=Mus musculus OX=10090 GN=Btf3 PE=1 SV=3	Btf3	9131420	11	6.96054	644	40.6053
YADVDPENQNF	Sodium-coupled neutral amino acid transporter 2 OS=Mus musculus OX=10090 GN=Slc38a2 PE=1 SV=1	Slc38a2	9104513	11	6.95926	643	40.5422
SMLQNPLGNVL	Cytoplasmic polyadenylation element-binding protein 1 OS=Mus musculus OX=10090 GN=Cpeb1 PE=1 SV=1	Cpeb1	9077731	11	6.95798	642	40.4792
FSPTNPAHL	WD repeat-containing protein 76 OS=Mus musculus OX=10090 GN=Wdr76 PE=1 SV=1	Wdr76	9076145	9	6.9579	641	40.4161
TVFSHAQTVVL	40S ribosomal protein S27-like OS=Mus musculus OX=10090 GN=Rps27l PE=1 SV=3;40S ribosomal protein S27 OS=Mus musculus OX=10090 GN=Rps27 PE=1 SV=3	Rps27l	9050715	11	6.95668	640	40.3531
GIYEALELRDN	Alpha-enolase OS=Mus musculus OX=10090 GN=Eno1 PE=1 SV=3	Eno1	9045615	11	6.95644	639	40.29
IDRVGQTIER	Heterogeneous nuclear ribonucleoprotein M OS=Mus musculus OX=10090 GN=Hnrnpm PE=1 SV=3	Hnrnpm	9038389	10	6.95609	638	40.227
RQYPNPFQL	Zinc finger protein 280C OS=Mus musculus OX=10090 GN=Znf280c PE=1 SV=1	Znf280c	9036483	9	6.956	637	40.1639
AIITGFRNV	Mitotic checkpoint serine/threonine-protein kinase BUB1 beta OS=Mus musculus OX=10090 GN=Bub1b PE=1 SV=2	Bub1b	9026593	9	6.95552	636	40.1009
SAIQSISHV	Histone-lysine N-methyltransferase MECOM OS=Mus musculus OX=10090 GN=Mecom PE=1 SV=2	Mecom	9023260	9	6.95536	635	40.0378
AIRVTNPNARL	60S ribosomal protein L32 OS=Mus musculus OX=10090 GN=Rpl32 PE=1 SV=2	Rpl32	9017986	11	6.95511	634	39.9748
GGNFGFGDSR	Heterogeneous nuclear ribonucleoproteins A2/B1 OS=Mus musculus OX=10090 GN=Hnrnpa2b1 PE=1 SV=2	Hnrnpa2b1	9016100	10	6.95502	633	39.9117
DPQTHSNRIY	Heat shock protein HSP 90-beta OS=Mus musculus OX=10090 GN=Hsp90ab1 PE=1 SV=3	Hsp90ab1	8971391	10	6.95286	632	39.8487
TLSKEEETKK	60S ribosomal protein L19 OS=Mus musculus OX=10090 GN=Rpl19 PE=1 SV=1	Rpl19	8950263	10	6.95184	631	39.7856
NKEEVLKNIKDY	T-cell-specific guanine nucleotide triphosphate-binding protein 1 OS=Mus musculus OX=10090 GN=Tgtp1 PE=1 SV=1	Tgtp1	8942310	12	6.95145	630	39.7226
SGLLNSQAL	Fatty acid synthase OS=Mus musculus OX=10090 GN=Fasn PE=1 SV=2	Fasn	8931011	9	6.9509	629	39.6595
NPAGNVGRP	5,6-dihydroxyindole-2-carboxylic acid oxidase OS=Mus musculus OX=10090 GN=Tyrp1 PE=1 SV=1	Tyrp1	8930272	9	6.95086	628	39.5965
RLITNSEEI	ATP-binding cassette sub-family D member 3 OS=Mus musculus OX=10090 GN=Abcd3 PE=1 SV=2	Abcd3	8926254	9	6.95067	627	39.5334
SPKVSDTVVEPY	Tubulin beta-3 chain OS=Mus musculus OX=10090 GN=Tubb3 PE=1 SV=1;Tubulin beta-5 chain OS=Mus musculus OX=10090 GN=Tubb5 PE=1 SV=1;Tubulin beta-4B chain OS=Mus musculus OX=10090 GN=Tubb4b PE=1 SV=1;Tubulin beta-6 chain OS=Mus musculus OX=10090 GN=Tubb6 PE=1 SV=1	Tubb3	8917825	12	6.95026	626	39.4704
VSILNRQVL	Nuclear mitotic apparatus protein 1 OS=Mus musculus OX=10090 GN=Numa1 PE=1 SV=1	Numa1	8907733	9	6.94977	625	39.4073
YGGGPGGGNF	Heterogeneous nuclear ribonucleoproteins A2/B1 OS=Mus musculus OX=10090 GN=Hnrnpa2b1 PE=1 SV=2	Hnrnpa2b1	8906955	10	6.94973	624	39.3443
SLRSPYGGGRPG	40S ribosomal protein S9 OS=Mus musculus OX=10090 GN=Rps9 PE=1 SV=3	Rps9	8901049	12	6.94944	623	39.2812
HTYDFEKL	Ribonucleoside-diphosphate reductase large subunit OS=Mus musculus OX=10090 GN=Rrm1 PE=1 SV=2	Rrm1	8884818	8	6.94865	622	39.2182
PLENAPIGHN	5,6-dihydroxyindole-2-carboxylic acid oxidase OS=Mus musculus OX=10090 GN=Tyrp1 PE=1 SV=1	Tyrp1	8875573	10	6.9482	621	39.1551
SMEVNVDTL	Dysbindin domain-containing protein 2 OS=Mus musculus OX=10090 GN=Dbndd2 PE=1 SV=1	Dbndd2	8862760	9	6.94757	620	39.0921
HNLTSLVVL	Fibrous sheath-interacting protein 2 OS=Mus musculus OX=10090 GN=Fsip2 PE=1 SV=3	Fsip2	8859356	9	6.9474	619	39.029
TKPGGGALVF	N-acetylgalactosamine kinase OS=Mus musculus OX=10090 GN=Galk2 PE=1 SV=1	Galk2	8854025	10	6.94714	618	38.966
SAINEVVTREY	60S ribosomal protein L31 OS=Mus musculus OX=10090 GN=Rpl31 PE=1 SV=1	Rpl31	8847745	11	6.94683	617	38.9029
RALTVPELTQ	Tubulin beta-3 chain OS=Mus musculus OX=10090 GN=Tubb3 PE=1 SV=1;Tubulin beta-5 chain OS=Mus musculus OX=10090 GN=Tubb5 PE=1 SV=1;Tubulin beta-4B chain OS=Mus musculus OX=10090 GN=Tubb4b PE=1 SV=1;Tubulin beta-6 chain OS=Mus musculus OX=10090 GN=Tubb6 PE=1 SV=1	Tubb3	8841494	10	6.94653	616	38.8398
RMVVPAAL	60S ribosomal protein L13a OS=Mus musculus OX=10090 GN=Rpl13a PE=1 SV=4	Rpl13a	8840947	8	6.9465	615	38.7768
DVVKDIEGWK	S-acyl fatty acid synthase thioesterase, medium chain OS=Mus musculus OX=10090 GN=Olah PE=2 SV=1	Olah	8831622	10	6.94604	614	38.7137
HEKIWFDKF	Elongation factor 1-delta OS=Mus musculus OX=10090 GN=Eef1d PE=1 SV=3	Eef1d	8828543	9	6.94589	613	38.6507
LSDGVAVLK	60 kDa heat shock protein, mitochondrial OS=Mus musculus OX=10090 GN=Hspd1 PE=1 SV=1	Hspd1	8800694	9	6.94452	612	38.5876
YQEFTDHLVK	40S ribosomal protein S2 OS=Mus musculus OX=10090 GN=Rps2 PE=1 SV=3	Rps2	8800144	10	6.94449	611	38.5246
SAVASFVTQL	Nicastrin OS=Mus musculus OX=10090 GN=Ncstn PE=1 SV=3	Ncstn	8797332	10	6.94435	610	38.4615
KVPAVPETLKK	60S ribosomal protein L7 OS=Mus musculus OX=10090 GN=Rpl7 PE=1 SV=2	Rpl7	8785665	11	6.94377	609	38.3985
SSLGLVSLGGK	Serpin H1 OS=Mus musculus OX=10090 GN=Serpinh1 PE=1 SV=3	Serpinh1	8780781	11	6.94353	608	38.3354
GAIRNISGTLP	CSC1-like protein 1 OS=Mus musculus OX=10090 GN=Tmem63a PE=1 SV=1	Tmem63a	8759085	11	6.94246	607	38.2724
SVEAAAELSAK	Parathymosin OS=Mus musculus OX=10090 GN=Ptms PE=1 SV=3	Ptms	8752368	11	6.94213	606	38.2093
RRALEKIDLK	60S ribosomal protein L3 OS=Mus musculus OX=10090 GN=Rpl3 PE=1 SV=3	Rpl3	8745264	10	6.94177	605	38.1463
IGDDDRGSW	Eukaryotic translation initiation factor 3 subunit A OS=Mus musculus OX=10090 GN=Eif3a PE=1 SV=5	Eif3a	8709672	9	6.94	604	38.0832
VQPTHVIHL	GDP-L-fucose synthase OS=Mus musculus OX=10090 GN=Tsta3 PE=1 SV=3	Tsta3	8701313	9	6.93958	603	38.0202
GRVFEVSLADL	40S ribosomal protein S3a OS=Mus musculus OX=10090 GN=Rps3a PE=1 SV=3	Rps3a	8693377	11	6.93919	602	37.9571
IQQSIERLLV	NHP2-like protein 1 OS=Mus musculus OX=10090 GN=Snu13 PE=1 SV=4	Snu13	8642378	10	6.93663	601	37.8941
RTLKLTTP	Tubulin beta-5 chain OS=Mus musculus OX=10090 GN=Tubb5 PE=1 SV=1;Tubulin beta-4B chain OS=Mus musculus OX=10090 GN=Tubb4b PE=1 SV=1;Tubulin beta-6 chain OS=Mus musculus OX=10090 GN=Tubb6 PE=1 SV=1	Tubb5	8635278	8	6.93628	600	37.831
SIHVGQAGVQI	Tubulin alpha-1A chain OS=Mus musculus OX=10090 GN=Tuba1a PE=1 SV=1;Tubulin alpha-1C chain OS=Mus musculus OX=10090 GN=Tuba1c PE=1 SV=1	Tuba1a	8633307	11	6.93618	599	37.768
RAGKVRGQTP	40S ribosomal protein S30 OS=Mus musculus OX=10090 GN=Fau PE=1 SV=1	Fau	8630977	10	6.93606	598	37.7049
GGPDFSNLEK	NudC domain-containing protein 2 OS=Mus musculus OX=10090 GN=Nudcd2 PE=1 SV=1	Nudcd2	8621452	10	6.93558	597	37.6419
SLLIMFPT	Vezatin OS=Mus musculus OX=10090 GN=Vezt PE=1 SV=2	Vezt	8607038	8	6.93485	596	37.5788
DALGEEWKGY	40S ribosomal protein S6 OS=Mus musculus OX=10090 GN=Rps6 PE=1 SV=1	Rps6	8602522	10	6.93463	595	37.5158
KDMANPTALL	Isocitrate dehydrogenase [NAD] subunit alpha, mitochondrial OS=Mus musculus OX=10090 GN=Idh3a PE=1 SV=1	Idh3a	8601478	10	6.93457	594	37.4527
WVLDKLKAERER	Elongation factor 1-alpha 1 OS=Mus musculus OX=10090 GN=Eef1a1 PE=1 SV=3	Eef1a1	8582040	12	6.93359	593	37.3897
TLEPSEKPF	Coatomer subunit gamma-1 OS=Mus musculus OX=10090 GN=Copg1 PE=1 SV=1;Coatomer subunit gamma-2 OS=Mus musculus OX=10090 GN=Copg2 PE=1 SV=1	Copg1	8575321	9	6.93325	592	37.3266
YAADNQIYI	Heterogeneous nuclear ribonucleoprotein L OS=Mus musculus OX=10090 GN=Hnrnpl PE=1 SV=2	Hnrnpl	8572981	9	6.93313	591	37.2636
SQKENLNFL	ATPase family AAA domain-containing protein 2 OS=Mus musculus OX=10090 GN=Atad2 PE=1 SV=1	Atad2	8526716	9	6.93078	590	37.2005
RVIDFTVL	LLGL scribble cell polarity complex component 2 OS=Mus musculus OX=10090 GN=Llgl2 PE=1 SV=2	Llgl2	8521628	8	6.93052	589	37.1375
TYNTTSAVTVK	60S ribosomal protein L37a OS=Mus musculus OX=10090 GN=Rpl37a PE=1 SV=2	Rpl37a	8475083	11	6.92814	588	37.0744
RGPPEKEW	Eukaryotic translation initiation factor 3 subunit A OS=Mus musculus OX=10090 GN=Eif3a PE=1 SV=5	Eif3a	8452204	8	6.92697	587	37.0113
TVAVGVIKAVD	Elongation factor 1-alpha 1 OS=Mus musculus OX=10090 GN=Eef1a1 PE=1 SV=3	Eef1a1	8449377	11	6.92682	586	36.9483
AQVIILNHP	Elongation factor 1-alpha 1 OS=Mus musculus OX=10090 GN=Eef1a1 PE=1 SV=3	Eef1a1	8446236	9	6.92666	585	36.8852
YDKDPEGTVQP	Cysteine-rich protein 2 OS=Mus musculus OX=10090 GN=Crip2 PE=1 SV=1	Crip2	8431526	11	6.92591	584	36.8222
YTVENAKDII	Tryptophan--tRNA ligase, cytoplasmic OS=Mus musculus OX=10090 GN=Wars1 PE=1 SV=2	Wars1	8428359	10	6.92574	583	36.7591
VIRNIVEA	40S ribosomal protein S26 OS=Mus musculus OX=10090 GN=Rps26 PE=1 SV=3	Rps26	8405122	8	6.92454	582	36.6961
RTLLIKTVETR	Vimentin OS=Mus musculus OX=10090 GN=Vim PE=1 SV=3	Vim	8404129	11	6.92449	581	36.633
SVPGVRLL	Vimentin OS=Mus musculus OX=10090 GN=Vim PE=1 SV=3	Vim	8398879	8	6.92422	580	36.57
AENGKLVINGKP	Glyceraldehyde-3-phosphate dehydrogenase OS=Mus musculus OX=10090 GN=Gapdh PE=1 SV=2	Gapdh	8.38847e+06	12	6.92368	579	36.5069
SIYAPARL	Cyclin-F OS=Mus musculus OX=10090 GN=Ccnf PE=2 SV=2	Ccnf	8.36639e+06	8	6.92254	578	36.4439
ERLVEMLR	Genetic suppressor element 1 OS=Mus musculus OX=10090 GN=Gse1 PE=1 SV=2	Gse1	8.3294e+06	8	6.92061	577	36.3808
RALENSSIM	Proline dehydrogenase 1, mitochondrial OS=Mus musculus OX=10090 GN=Prodh PE=1 SV=2	Prodh	8327364	9	6.92051	576	36.3178
RALSNLESI	Ubiquilin-3 OS=Mus musculus OX=10090 GN=Ubqln3 PE=1 SV=1	Ubqln3	8.31734e+06	9	6.91998	575	36.2547
SQLLNLGSY	Shieldin complex subunit 2 OS=Mus musculus OX=10090 GN=Shld2 PE=2 SV=2	Shld2	8304401	9	6.91931	574	36.1917
ASPVHAGGSAG	Palmitoyltransferase ZDHHC1 OS=Mus musculus OX=10090 GN=Zdhhc1 PE=1 SV=2	Zdhhc1	8291319	11	6.91862	573	36.1286
RQVENVLSL	Adenine nucleotide translocase lysine N-methyltransferase OS=Mus musculus OX=10090 GN=Antkmt PE=1 SV=1	Antkmt	8277613	9	6.91791	572	36.0656
IRKPNEGADGQW	Plasminogen activator inhibitor 1 RNA-binding protein OS=Mus musculus OX=10090 GN=Serbp1 PE=1 SV=2	Serbp1	8.27157e+06	12	6.91759	571	36.0025
FGDGYNGYGGGP	Heterogeneous nuclear ribonucleoproteins A2/B1 OS=Mus musculus OX=10090 GN=Hnrnpa2b1 PE=1 SV=2	Hnrnpa2b1	8256902	12	6.91682	570	35.9395
FVEWIPNNVK	Tubulin beta-3 chain OS=Mus musculus OX=10090 GN=Tubb3 PE=1 SV=1;Tubulin beta-5 chain OS=Mus musculus OX=10090 GN=Tubb5 PE=1 SV=1;Tubulin beta-4B chain OS=Mus musculus OX=10090 GN=Tubb4b PE=1 SV=1;Tubulin beta-6 chain OS=Mus musculus OX=10090 GN=Tubb6 PE=1 SV=1	Tubb3	8.25155e+06	10	6.91654	569	35.8764
PDYLGADQR	26S proteasome regulatory subunit 7 OS=Mus musculus OX=10090 GN=Psmc2 PE=1 SV=5	Psmc2	8.24531e+06	9	6.91621	568	35.8134
LDIERPTYTNL	Tubulin alpha-8 chain OS=Mus musculus OX=10090 GN=Tuba8 PE=1 SV=1;Tubulin alpha-1A chain OS=Mus musculus OX=10090 GN=Tuba1a PE=1 SV=1;Tubulin alpha-1C chain OS=Mus musculus OX=10090 GN=Tuba1c PE=1 SV=1	Tuba8	8242787	11	6.91607	567	35.7503
FVSSRFLQ	Protein transport protein Sec23B OS=Mus musculus OX=10090 GN=Sec23b PE=1 SV=1	Sec23b	8236038	8	6.91572	566	35.6873
TAPQTQHVSPM	Elongation factor 1-delta OS=Mus musculus OX=10090 GN=Eef1d PE=1 SV=3	Eef1d	8214455	11	6.91458	565	35.6242
VGRVETGVLKP	Elongation factor 1-alpha 1 OS=Mus musculus OX=10090 GN=Eef1a1 PE=1 SV=3	Eef1a1	8206675	11	6.91417	564	35.5612
RDIPELQDF	Acetoacetyl-CoA synthetase OS=Mus musculus OX=10090 GN=Aacs PE=1 SV=1	Aacs	8146187	9	6.91095	563	35.4981
APIDRVGQTIE	Heterogeneous nuclear ribonucleoprotein M OS=Mus musculus OX=10090 GN=Hnrnpm PE=1 SV=3	Hnrnpm	8.12983e+06	11	6.91008	562	35.4351
AVFPSIVGRPR	Actin, cytoplasmic 1 OS=Mus musculus OX=10090 GN=Actb PE=1 SV=1;Actin, alpha cardiac muscle 1 OS=Mus musculus OX=10090 GN=Actc1 PE=1 SV=1	Actb	8.12574e+06	11	6.90986	561	35.372
KIVPFFKL	Cytoplasmic dynein 1 heavy chain 1 OS=Mus musculus OX=10090 GN=Dync1h1 PE=1 SV=2	Dync1h1	8.08377e+06	8	6.90761	560	35.309
AALNNHVEV	E3 ubiquitin-protein ligase MIB1 OS=Mus musculus OX=10090 GN=Mib1 PE=1 SV=1	Mib1	8.06452e+06	9	6.90658	559	35.2459
TLAERSTGLAF	Serpin H1 OS=Mus musculus OX=10090 GN=Serpinh1 PE=1 SV=3	Serpinh1	8064442	11	6.90657	558	35.1828
SGIRNISFM	Disintegrin and metalloproteinase domain-containing protein 10 OS=Mus musculus OX=10090 GN=Adam10 PE=1 SV=2	Adam10	8035945	9	6.90504	557	35.1198
RIDSAATSTY	Low molecular weight phosphotyrosine protein phosphatase OS=Mus musculus OX=10090 GN=Acp1 PE=1 SV=3	Acp1	8.02441e+06	10	6.90441	556	35.0567
HSVGVVIGR	Far upstream element-binding protein 2 OS=Mus musculus OX=10090 GN=Khsrp PE=1 SV=2	Khsrp	8.01956e+06	9	6.90415	555	34.9937
YGSGRGFGDGY	Heterogeneous nuclear ribonucleoproteins A2/B1 OS=Mus musculus OX=10090 GN=Hnrnpa2b1 PE=1 SV=2	Hnrnpa2b1	8.00422e+06	11	6.90332	554	34.9306
ISIPGKDPD	Transmembrane glycoprotein NMB OS=Mus musculus OX=10090 GN=Gpnmb PE=1 SV=2	Gpnmb	7.99947e+06	9	6.90306	553	34.8676
IAPKNPTISL	TOM1-like protein 1 OS=Mus musculus OX=10090 GN=Tom1l1 PE=1 SV=1	Tom1l1	7.99535e+06	10	6.90284	552	34.8045
RNYSYEKL	Junction plakoglobin OS=Mus musculus OX=10090 GN=Jup PE=1 SV=3	Jup	7992894	8	6.9027	551	34.7415
FRDVLGTGAFS	Calcium/calmodulin-dependent protein kinase type 1 OS=Mus musculus OX=10090 GN=Camk1 PE=1 SV=1	Camk1	7991932	11	6.90265	550	34.6784
IFMHSGLT	Epidermal growth factor receptor substrate 15-like 1 OS=Mus musculus OX=10090 GN=Eps15l1 PE=1 SV=3	Eps15l1	7.98751e+06	8	6.90241	549	34.6154
VATVPGTLKK	60S ribosomal protein L7 OS=Mus musculus OX=10090 GN=Rpl7 PE=1 SV=2	Rpl7	7.98123e+06	10	6.90207	548	34.5523
YMSVADEHL	Protein tweety homolog 2 OS=Mus musculus OX=10090 GN=Ttyh2 PE=1 SV=1	Ttyh2	7978579	9	6.90193	547	34.4893
IERPTYTNL	Tubulin alpha-8 chain OS=Mus musculus OX=10090 GN=Tuba8 PE=1 SV=1;Tubulin alpha-1A chain OS=Mus musculus OX=10090 GN=Tuba1a PE=1 SV=1;Tubulin alpha-1C chain OS=Mus musculus OX=10090 GN=Tuba1c PE=1 SV=1	Tuba8	7970001	9	6.90146	546	34.4262
LLEETVQAMEVE	Proteasome subunit beta type-10 OS=Mus musculus OX=10090 GN=Psmb10 PE=1 SV=1	Psmb10	7966917	12	6.90129	545	34.3632
TAPQYYRL	DALR anticodon-binding domain-containing protein 3 OS=Mus musculus OX=10090 GN=Dalrd3 PE=2 SV=1	Dalrd3	7.96486e+06	8	6.90118	544	34.3001
TGAPGGLGELL	Hypermethylated in cancer 1 protein OS=Mus musculus OX=10090 GN=Hic1 PE=1 SV=4	Hic1	7964320	11	6.90115	543	34.2371
RVAAIIDRLI	Cell surface hyaluronidase OS=Mus musculus OX=10090 GN=Cemip2 PE=1 SV=1	Cemip2	7.95331e+06	10	6.90055	542	34.174
KQQKKEEILK	Coiled-coil domain-containing protein 112 OS=Mus musculus OX=10090 GN=Ccdc112 PE=2 SV=2	Ccdc112	7.92475e+06	10	6.89899	541	34.111
RDGYQQNF	Caprin-1 OS=Mus musculus OX=10090 GN=Caprin1 PE=1 SV=2	Caprin1	7915018	8	6.89845	540	34.0479
ALDYETLTRPH	28S ribosomal protein S34, mitochondrial OS=Mus musculus OX=10090 GN=Mrps34 PE=1 SV=1	Mrps34	7913457	11	6.89837	539	33.9849
AALRPLVKP	60S ribosomal protein L32 OS=Mus musculus OX=10090 GN=Rpl32 PE=1 SV=2	Rpl32	7912666	9	6.89832	538	33.9218
GGRANITSLG	Dihydropyrimidinase-related protein 2 OS=Mus musculus OX=10090 GN=Dpysl2 PE=1 SV=2	Dpysl2	7911401	10	6.89825	537	33.8588
GSGGSGGYGGR	Heterogeneous nuclear ribonucleoproteins A2/B1 OS=Mus musculus OX=10090 GN=Hnrnpa2b1 PE=1 SV=2	Hnrnpa2b1	7910760	11	6.89822	536	33.7957
TVVGDDYHTW	Voltage-gated hydrogen channel 1 OS=Mus musculus OX=10090 GN=Hvcn1 PE=1 SV=2	Hvcn1	7903235	10	6.8978	535	33.7327
GVGGVSVTSF	NIF3-like protein 1 OS=Mus musculus OX=10090 GN=Nif3l1 PE=1 SV=4	Nif3l1	7.88619e+06	10	6.89687	534	33.6696
HPEQLITG	Tubulin alpha-8 chain OS=Mus musculus OX=10090 GN=Tuba8 PE=1 SV=1;Tubulin alpha-1A chain OS=Mus musculus OX=10090 GN=Tuba1a PE=1 SV=1;Tubulin alpha-1C chain OS=Mus musculus OX=10090 GN=Tuba1c PE=1 SV=1	Tuba8	7879927	8	6.89652	533	33.6066
APEEHPVLL	Actin, cytoplasmic 1 OS=Mus musculus OX=10090 GN=Actb PE=1 SV=1	Actb	7862356	9	6.89555	532	33.5435
SGLQNFEAL	Protein unc-45 homolog A OS=Mus musculus OX=10090 GN=Unc45a PE=1 SV=2	Unc45a	7.8533e+06	9	6.89505	531	33.4805
RIYKKGDIVDIK	60S ribosomal protein L21 OS=Mus musculus OX=10090 GN=Rpl21 PE=1 SV=3	Rpl21	7849158	12	6.89482	530	33.4174
FMISHLDYL	Serine-protein kinase ATM OS=Mus musculus OX=10090 GN=Atm PE=1 SV=2	Atm	7839133	9	6.89427	529	33.3544
TIGISVDPR	60S ribosomal protein L13 OS=Mus musculus OX=10090 GN=Rpl13 PE=1 SV=3	Rpl13	7.83209e+06	9	6.89388	528	33.2913
DVQLQESG	Ig heavy chain V region MOPC 315 OS=Mus musculus OX=10090 PE=1 SV=2	?	7.81688e+06	8	6.89303	527	33.2282
ALDPSFPRMN	RNA cytosine C(5)-methyltransferase NSUN2 OS=Mus musculus OX=10090 GN=Nsun2 PE=1 SV=2	Nsun2	7798072	10	6.89199	526	33.1652
FAHIDGDHL	Pre-mRNA-splicing factor ATP-dependent RNA helicase DHX15 OS=Mus musculus OX=10090 GN=Dhx15 PE=1 SV=2	Dhx15	7761294	9	6.88993	525	33.1021
MVEKVPDSTY	26S proteasome regulatory subunit 8 OS=Mus musculus OX=10090 GN=Psmc5 PE=1 SV=1	Psmc5	7753107	10	6.88948	524	33.0391
DDRAYSSF	Eukaryotic translation initiation factor 4H OS=Mus musculus OX=10090 GN=Eif4h PE=1 SV=3	Eif4h	7.75217e+06	8	6.88942	523	32.976
SLNERFTNM	Chromatin target of PRMT1 protein OS=Mus musculus OX=10090 GN=Chtop PE=1 SV=2	Chtop	7.73932e+06	9	6.8887	522	32.913
FMARVFMR	Oligosaccharyltransferase complex subunit OSTC OS=Mus musculus OX=10090 GN=Ostc PE=1 SV=1	Ostc	7733400	8	6.88837	521	32.8499
KQVSNPLPKVL	Huntingtin-interacting protein 1 OS=Mus musculus OX=10090 GN=Hip1 PE=1 SV=2	Hip1	7.71672e+06	11	6.88743	520	32.7869
AQYGNILKHVM	Nucleoporin NUP35 OS=Mus musculus OX=10090 GN=Nup35 PE=1 SV=2	Nup35	7714947	11	6.88733	519	32.7238
VVYIYKEHF	Small subunit processome component 20 homolog OS=Mus musculus OX=10090 GN=Utp20 PE=1 SV=2	Utp20	7.70842e+06	9	6.88697	518	32.6608
VGGGIDVPVPR	Far upstream element-binding protein 2 OS=Mus musculus OX=10090 GN=Khsrp PE=1 SV=2	Khsrp	7702597	11	6.88664	517	32.5977
AVVLFETATLR	Endoplasmin OS=Mus musculus OX=10090 GN=Hsp90b1 PE=1 SV=2	Hsp90b1	7681477	11	6.88544	516	32.5347
YEEIVKEVSTY	Elongation factor 1-alpha 1 OS=Mus musculus OX=10090 GN=Eef1a1 PE=1 SV=3	Eef1a1	7667222	11	6.88464	515	32.4716
AVLRYTKL	Replication factor C subunit 2 OS=Mus musculus OX=10090 GN=Rfc2 PE=1 SV=1	Rfc2	7.66145e+06	8	6.88431	514	32.4086
KRSSMPLDKPLG	DNA cross-link repair 1A protein OS=Mus musculus OX=10090 GN=Dclre1a PE=1 SV=2	Dclre1a	7651820	12	6.88376	513	32.3455
LKEDQTEYLEER	Heat shock protein HSP 90-alpha OS=Mus musculus OX=10090 GN=Hsp90aa1 PE=1 SV=4;Heat shock protein HSP 90-beta OS=Mus musculus OX=10090 GN=Hsp90ab1 PE=1 SV=3	Hsp90aa1	7.62515e+06	12	6.88225	512	32.2825
YLGDGPKLVR	26S proteasome regulatory subunit 4 OS=Mus musculus OX=10090 GN=Psmc1 PE=1 SV=1	Psmc1	7.62185e+06	10	6.88206	511	32.2194
RLAKADGIVSK	40S ribosomal protein S21 OS=Mus musculus OX=10090 GN=Rps21 PE=1 SV=1	Rps21	7.61842e+06	11	6.88186	510	32.1564
LEKPAKYDDIK	Glyceraldehyde-3-phosphate dehydrogenase OS=Mus musculus OX=10090 GN=Gapdh PE=1 SV=2	Gapdh	7.59371e+06	11	6.88045	509	32.0933
TSPINPYKDHM	Zinc finger E-box-binding homeobox 2 OS=Mus musculus OX=10090 GN=Zeb2 PE=1 SV=2	Zeb2	7568910	11	6.87903	508	32.0303
KKQEGTPEGLYL	26S proteasome regulatory subunit 4 OS=Mus musculus OX=10090 GN=Psmc1 PE=1 SV=1	Psmc1	7.56722e+06	12	6.87894	507	31.9672
ATTLAERSTGLA	Serpin H1 OS=Mus musculus OX=10090 GN=Serpinh1 PE=1 SV=3	Serpinh1	7565918	12	6.87886	506	31.9042
SLEELRVA	60S ribosomal protein L13 OS=Mus musculus OX=10090 GN=Rpl13 PE=1 SV=3	Rpl13	7559621	8	6.8785	505	31.8411
SGYIYHKL	Regulator of nonsense transcripts 1 OS=Mus musculus OX=10090 GN=Upf1 PE=1 SV=2	Upf1	7.54601e+06	8	6.87772	504	31.7781
RGPAEESSSW	Eukaryotic translation initiation factor 3 subunit A OS=Mus musculus OX=10090 GN=Eif3a PE=1 SV=5	Eif3a	7.5422e+06	10	6.8775	503	31.715
AALLNTDLV	U3 small nucleolar RNA-interacting protein 2 OS=Mus musculus OX=10090 GN=Rrp9 PE=1 SV=1	Rrp9	7.53715e+06	9	6.87721	502	31.652
IGPNNGKNFF	Endonuclease 8-like 3 OS=Mus musculus OX=10090 GN=Neil3 PE=1 SV=1	Neil3	7.53241e+06	10	6.87693	501	31.5889
ASPIFTHV	Pre-mRNA-splicing factor CWC22 homolog OS=Mus musculus OX=10090 GN=Cwc22 PE=1 SV=1	Cwc22	7.52926e+06	8	6.87675	500	31.5259
RLAPDYDALDVA	60S ribosomal protein L23a OS=Mus musculus OX=10090 GN=Rpl23a PE=1 SV=1	Rpl23a	7519544	12	6.87619	499	31.4628
YSSSPGGAYVTR	Vimentin OS=Mus musculus OX=10090 GN=Vim PE=1 SV=3	Vim	7506752	12	6.87545	498	31.3997
RIVENVNVI	Elongation factor 2 OS=Mus musculus OX=10090 GN=Eef2 PE=1 SV=2	Eef2	7.48838e+06	9	6.87439	497	31.3367
HFKGLVLIA	Albumin OS=Mus musculus OX=10090 GN=Alb PE=1 SV=3	Alb	7.47152e+06	9	6.87341	496	31.2736
YGFQNAILVR	Albumin OS=Mus musculus OX=10090 GN=Alb PE=1 SV=3	Alb	7468567	10	6.87324	495	31.2106
ALVPTPGK	Nucleolin OS=Mus musculus OX=10090 GN=Ncl PE=1 SV=2	Ncl	7463210	8	6.87293	494	31.1475
VMVKPGSIQPH	Elongation factor Tu, mitochondrial OS=Mus musculus OX=10090 GN=Tufm PE=1 SV=1	Tufm	7.46039e+06	11	6.87276	493	31.0845
VLYDEIKKYT	ADP/ATP translocase 2 OS=Mus musculus OX=10090 GN=Slc25a5 PE=1 SV=3	Slc25a5	7459618	10	6.87272	492	31.0214
APIDRVGQTIER	Heterogeneous nuclear ribonucleoprotein M OS=Mus musculus OX=10090 GN=Hnrnpm PE=1 SV=3	Hnrnpm	7.4462e+06	12	6.87193	491	30.9584
ILRIEEELGSK	Alpha-enolase OS=Mus musculus OX=10090 GN=Eno1 PE=1 SV=3	Eno1	7.44543e+06	11	6.87189	490	30.8953
GADGQWKKGF	Plasminogen activator inhibitor 1 RNA-binding protein OS=Mus musculus OX=10090 GN=Serbp1 PE=1 SV=2	Serbp1	7.4375e+06	10	6.87143	489	30.8323
DVQIFNSSS	Mucin-19 OS=Mus musculus OX=10090 GN=Muc19 PE=2 SV=2	Muc19	7386125	9	6.86842	488	30.7692
SAPTGKYDPAVR	5,6-dihydroxyindole-2-carboxylic acid oxidase OS=Mus musculus OX=10090 GN=Tyrp1 PE=1 SV=1	Tyrp1	7373499	12	6.86767	487	30.7062
FSNVNLKEV	DNA damage-binding protein 1 OS=Mus musculus OX=10090 GN=Ddb1 PE=1 SV=2	Ddb1	7363238	9	6.86707	486	30.6431
MGESDDSILRLA	40S ribosomal protein S21 OS=Mus musculus OX=10090 GN=Rps21 PE=1 SV=1	Rps21	7361921	12	6.86699	485	30.5801
YLEKAIKIHN	Ubiquitin carboxyl-terminal hydrolase 7 OS=Mus musculus OX=10090 GN=Usp7 PE=1 SV=1	Usp7	7.35378e+06	10	6.86651	484	30.517
REEYEGPNKKP	Splicing factor, proline- and glutamine-rich OS=Mus musculus OX=10090 GN=Sfpq PE=1 SV=1	Sfpq	7351387	11	6.86637	483	30.454
VLDTNDRFLR	Monofunctional C1-tetrahydrofolate synthase, mitochondrial OS=Mus musculus OX=10090 GN=Mthfd1l PE=1 SV=2;C-1-tetrahydrofolate synthase, cytoplasmic OS=Mus musculus OX=10090 GN=Mthfd1 PE=1 SV=4	Mthfd1l	7347870	10	6.86616	482	30.3909
HKVETFSGVY	40S ribosomal protein S7 OS=Mus musculus OX=10090 GN=Rps7 PE=2 SV=1	Rps7	7.34769e+06	10	6.86615	481	30.3279
RLAHEVGWKY	60S ribosomal protein L13a OS=Mus musculus OX=10090 GN=Rpl13a PE=1 SV=4	Rpl13a	7.30187e+06	10	6.86343	480	30.2648
GQDIQPKRDL	60S ribosomal protein L7a OS=Mus musculus OX=10090 GN=Rpl7a PE=1 SV=2	Rpl7a	7.29658e+06	10	6.86312	479	30.2018
AALQNLVKI	Importin subunit beta-1 OS=Mus musculus OX=10090 GN=Kpnb1 PE=1 SV=2	Kpnb1	7291359	9	6.86281	478	30.1387
AAQEGHLEL	Ankyrin repeat domain-containing protein 17 OS=Mus musculus OX=10090 GN=Ankrd17 PE=1 SV=2	Ankrd17	7278748	9	6.86206	477	30.0757
KLIEVDDERKL	40S ribosomal protein S6 OS=Mus musculus OX=10090 GN=Rps6 PE=1 SV=1	Rps6	7271679	11	6.86163	476	30.0126
SPYQEFTDHLVK	40S ribosomal protein S2 OS=Mus musculus OX=10090 GN=Rps2 PE=1 SV=3	Rps2	7265343	12	6.86126	475	29.9496
ITAIKGVGRRY	40S ribosomal protein S18 OS=Mus musculus OX=10090 GN=Rps18 PE=1 SV=3	Rps18	7257590	11	6.86079	474	29.8865
AAMRPDVI	ETS-related transcription factor Elf-2 OS=Mus musculus OX=10090 GN=Elf2 PE=1 SV=1	Elf2	7.25693e+06	8	6.86075	473	29.8235
GLEPEEKLRLG	IgE-binding protein OS=Mus musculus OX=10090 GN=Iap PE=2 SV=1	Iap	7244777	11	6.86003	472	29.7604
KDDYHSLLY	Tyrosinase OS=Mus musculus OX=10090 GN=Tyr PE=1 SV=3	Tyr	7234904	9	6.85943	471	29.6974
RAVDNQVYV	Omega-amidase NIT2 OS=Mus musculus OX=10090 GN=Nit2 PE=1 SV=1	Nit2	7.2327e+06	9	6.8593	470	29.6343
SRGNPTVEVDLY	Alpha-enolase OS=Mus musculus OX=10090 GN=Eno1 PE=1 SV=3	Eno1	7.23079e+06	12	6.85919	469	29.5712
VSVIIALR	G-protein coupled receptor 22 OS=Mus musculus OX=10090 GN=Gpr22 PE=2 SV=1	Gpr22	7.22788e+06	8	6.85901	468	29.5082
SAVISLEGKPL	Cofilin-1 OS=Mus musculus OX=10090 GN=Cfl1 PE=1 SV=3	Cfl1	7.20543e+06	11	6.85766	467	29.4451
LRSSVPGVRLLQ	Vimentin OS=Mus musculus OX=10090 GN=Vim PE=1 SV=3	Vim	7203931	12	6.85757	466	29.3821
VIDEGLTTKH	Uncharacterized protein C11orf98 homolog OS=Mus musculus OX=10090 PE=1 SV=1	?	7190420	10	6.85675	465	29.319
RVAQKKASFL	60S ribosomal protein L5 OS=Mus musculus OX=10090 GN=Rpl5 PE=1 SV=3	Rpl5	7179994	10	6.85612	464	29.256
YIDGVTMEEATV	Zinc finger CCCH-type antiviral protein 1 OS=Mus musculus OX=10090 GN=Zc3hav1 PE=1 SV=1	Zc3hav1	7179008	12	6.85606	463	29.1929
YRGGSISVQVNS	Nucleolar and coiled-body phosphoprotein 1 OS=Mus musculus OX=10090 GN=Nolc1 PE=1 SV=1	Nolc1	7.1763e+06	12	6.8559	462	29.1299
IRYFPTQAL	ADP/ATP translocase 2 OS=Mus musculus OX=10090 GN=Slc25a5 PE=1 SV=3	Slc25a5	7.1705e+06	9	6.85555	461	29.0668
IGVEHVVVY	Elongation factor Tu, mitochondrial OS=Mus musculus OX=10090 GN=Tufm PE=1 SV=1	Tufm	7.15523e+06	9	6.85462	460	29.0038
FVNDIFERIA	Histone H2B type 1-B OS=Mus musculus OX=10090 GN=H2bc3 PE=1 SV=3;Histone H2B type 1-F/J/L OS=Mus musculus OX=10090 GN=H2bc7 PE=1 SV=2	H2bc3	7142491	10	6.85385	459	28.9407
RQWANLMEKI	Apolipoprotein E OS=Mus musculus OX=10090 GN=Apoe PE=1 SV=2	Apoe	7.13784e+06	10	6.85357	458	28.8777
FAAAQIGNSF	Glycine--tRNA ligase OS=Mus musculus OX=10090 GN=Gars1 PE=1 SV=1	Gars1	7.13782e+06	10	6.85357	457	28.8146
LSPINHNTL	Rapamycin-insensitive companion of mTOR OS=Mus musculus OX=10090 GN=Rictor PE=1 SV=2	Rictor	7122392	9	6.85263	456	28.7516
KLATQLTGP	60S ribosomal protein L13 OS=Mus musculus OX=10090 GN=Rpl13 PE=1 SV=3	Rpl13	7.11001e+06	9	6.85187	455	28.6885
KLGSRLYGP	Serpin H1 OS=Mus musculus OX=10090 GN=Serpinh1 PE=1 SV=3	Serpinh1	7.10772e+06	9	6.85173	454	28.6255
KDVNAAIATIK	Tubulin alpha-1A chain OS=Mus musculus OX=10090 GN=Tuba1a PE=1 SV=1;Tubulin alpha-1C chain OS=Mus musculus OX=10090 GN=Tuba1c PE=1 SV=1	Tuba1a	7093631	11	6.85087	453	28.5624
VLKDPDSNPY	Fragile X mental retardation syndrome-related protein 1 OS=Mus musculus OX=10090 GN=Fxr1 PE=1 SV=2;Fragile X mental retardation syndrome-related protein 2 OS=Mus musculus OX=10090 GN=Fxr2 PE=1 SV=1	Fxr1	7083801	10	6.85027	452	28.4994
AGLQFPVGRVH	Histone H2AX OS=Mus musculus OX=10090 GN=H2ax PE=1 SV=2	H2ax	7.08116e+06	11	6.8501	451	28.4363
KRFTDEESRVF	Bcl-2-associated transcription factor 1 OS=Mus musculus OX=10090 GN=Bclaf1 PE=1 SV=2	Bclaf1	7.0705e+06	11	6.84945	450	28.3733
SAPVVPSSF	Importin-7 OS=Mus musculus OX=10090 GN=Ipo7 PE=1 SV=2	Ipo7	7069277	9	6.84937	449	28.3102
IDLKFIDTTSKF	60S ribosomal protein L3 OS=Mus musculus OX=10090 GN=Rpl3 PE=1 SV=3	Rpl3	7065982	12	6.84917	448	28.2472
AGQFNQDYL	Annexin A11 OS=Mus musculus OX=10090 GN=Anxa11 PE=1 SV=2	Anxa11	7025191	9	6.84666	447	28.1841
NTPDFGFGGQKR	Far upstream element-binding protein 2 OS=Mus musculus OX=10090 GN=Khsrp PE=1 SV=2	Khsrp	7021529	12	6.84643	446	28.1211
TEAPLNPK	Actin, cytoplasmic 1 OS=Mus musculus OX=10090 GN=Actb PE=1 SV=1;Actin, alpha cardiac muscle 1 OS=Mus musculus OX=10090 GN=Actc1 PE=1 SV=1	Actb	7.0191e+06	8	6.84628	445	28.058
KETVFTKSPYQE	40S ribosomal protein S2 OS=Mus musculus OX=10090 GN=Rps2 PE=1 SV=3	Rps2	7008883	12	6.84565	444	27.995
VGQMVISGVDR	Perilipin-3 OS=Mus musculus OX=10090 GN=Plin3 PE=1 SV=1	Plin3	7.00472e+06	11	6.84539	443	27.9319
AGLLNNPHFI	Small glutamine-rich tetratricopeptide repeat-containing protein alpha OS=Mus musculus OX=10090 GN=Sgta PE=1 SV=2	Sgta	6992518	10	6.84463	442	27.8689
KQEGTPEGLYL	26S proteasome regulatory subunit 4 OS=Mus musculus OX=10090 GN=Psmc1 PE=1 SV=1	Psmc1	6972421	11	6.84338	441	27.8058
VMTIPYQPMPA	Poly(rC)-binding protein 1 OS=Mus musculus OX=10090 GN=Pcbp1 PE=1 SV=1	Pcbp1	6968806	11	6.84316	440	27.7427
RTNEKVELQELN	Vimentin OS=Mus musculus OX=10090 GN=Vim PE=1 SV=3	Vim	6966946	12	6.84304	439	27.6797
SGYDFSRL	Sterol regulatory element-binding protein cleavage-activating protein OS=Mus musculus OX=10090 GN=Scap PE=1 SV=1	Scap	6961679	8	6.84271	438	27.6166
SNTTAIAEAWAR	Tubulin alpha-8 chain OS=Mus musculus OX=10090 GN=Tuba8 PE=1 SV=1;Tubulin alpha-1A chain OS=Mus musculus OX=10090 GN=Tuba1a PE=1 SV=1;Tubulin alpha-1C chain OS=Mus musculus OX=10090 GN=Tuba1c PE=1 SV=1	Tuba8	6.95946e+06	12	6.84258	437	27.5536
TFSSIPVSR	Cytoplasmic dynein 1 heavy chain 1 OS=Mus musculus OX=10090 GN=Dync1h1 PE=1 SV=2	Dync1h1	6.95205e+06	9	6.84211	436	27.4905
YVVDNIDHL	E3 ubiquitin-protein ligase COP1 OS=Mus musculus OX=10090 GN=Cop1 PE=1 SV=2	Cop1	6940383	9	6.84138	435	27.4275
NNLQISEG	Protein furry homolog OS=Mus musculus OX=10090 GN=Fry PE=1 SV=1	Fry	6922530	8	6.84026	434	27.3644
RSPENVIETI	eIF-2-alpha kinase activator GCN1 OS=Mus musculus OX=10090 GN=Gcn1 PE=1 SV=1	Gcn1	6.91869e+06	10	6.84002	433	27.3014
EIISFQHL	Volume-regulated anion channel subunit LRRC8B OS=Mus musculus OX=10090 GN=Lrrc8b PE=1 SV=3	Lrrc8b	6873836	8	6.8372	432	27.2383
YLYPNIDKDH	Signal transducer and activator of transcription 1 OS=Mus musculus OX=10090 GN=Stat1 PE=1 SV=1	Stat1	6868565	10	6.83687	431	27.1753
KVPAGPKTL	60S ribosomal protein L7 OS=Mus musculus OX=10090 GN=Rpl7 PE=1 SV=2	Rpl7	6866904	9	6.83676	430	27.1122
TVTKTVSNDSFF	Nucleosome assembly protein 1-like 1 OS=Mus musculus OX=10090 GN=Nap1l1 PE=1 SV=2	Nap1l1	6866635	12	6.83674	429	27.0492
FALSGSWDGTLR	Receptor of activated protein C kinase 1 OS=Mus musculus OX=10090 GN=Rack1 PE=1 SV=3	Rack1	6861010	12	6.83639	428	26.9861
GQGFRLGDQ	Derlin-1 OS=Mus musculus OX=10090 GN=Derl1 PE=1 SV=1	Derl1	6849404	9	6.83565	427	26.9231
AREGGLQVDP	WD repeat-containing protein 46 OS=Mus musculus OX=10090 GN=Wdr46 PE=2 SV=1	Wdr46	6836026	10	6.8348	426	26.86
SGVQSLRSHVL	Zinc finger CCCH-type antiviral protein 1 OS=Mus musculus OX=10090 GN=Zc3hav1 PE=1 SV=1	Zc3hav1	6.82936e+06	11	6.83438	425	26.797
YEELPNPNHSMV	5,6-dihydroxyindole-2-carboxylic acid oxidase OS=Mus musculus OX=10090 GN=Tyrp1 PE=1 SV=1	Tyrp1	6815463	12	6.8335	424	26.7339
DHVLVEMGY	Tudor domain-containing protein 1 OS=Mus musculus OX=10090 GN=Tdrd1 PE=1 SV=2	Tdrd1	6810166	9	6.83316	423	26.6709
KFYSVNVDYSK	Cytochrome c oxidase subunit NDUFA4 OS=Mus musculus OX=10090 GN=Ndufa4 PE=1 SV=2	Ndufa4	6804774	11	6.83281	422	26.6078
LGSRLYGP	Serpin H1 OS=Mus musculus OX=10090 GN=Serpinh1 PE=1 SV=3	Serpinh1	6.77009e+06	8	6.83059	421	26.5448
LVAQDTKNILE	Immunity-related GTPase family M protein 1 OS=Mus musculus OX=10090 GN=Irgm1 PE=1 SV=1	Irgm1	6763384	11	6.83016	420	26.4817
LIEVDDERKLR	40S ribosomal protein S6 OS=Mus musculus OX=10090 GN=Rps6 PE=1 SV=1	Rps6	6.76281e+06	11	6.83013	419	26.4187
ADGYVLEGK	40S ribosomal protein S8 OS=Mus musculus OX=10090 GN=Rps8 PE=1 SV=2	Rps8	6745882	9	6.82904	418	26.3556
RQIFNGTFV	60S ribosomal protein L7 OS=Mus musculus OX=10090 GN=Rpl7 PE=1 SV=2	Rpl7	6739576	9	6.82863	417	26.2926
LDIERPTYT	Tubulin alpha-8 chain OS=Mus musculus OX=10090 GN=Tuba8 PE=1 SV=1;Tubulin alpha-1A chain OS=Mus musculus OX=10090 GN=Tuba1a PE=1 SV=1;Tubulin alpha-1C chain OS=Mus musculus OX=10090 GN=Tuba1c PE=1 SV=1	Tuba8	6.7303e+06	9	6.82803	416	26.2295
AAYGFRNI	Nuclear prelamin A recognition factor OS=Mus musculus OX=10090 GN=Narf PE=2 SV=1	Narf	6.72014e+06	8	6.82738	415	26.1665
IRGPAEAEATTD	Twinfilin-1 OS=Mus musculus OX=10090 GN=Twf1 PE=1 SV=2	Twf1	6714997	12	6.82705	414	26.1034
RQTVNVIAM	Tumor susceptibility gene 101 protein OS=Mus musculus OX=10090 GN=Tsg101 PE=1 SV=2	Tsg101	6.71315e+06	9	6.82693	413	26.0404
RSGVNSELV	Protein DEK OS=Mus musculus OX=10090 GN=Dek PE=1 SV=1	Dek	6.71239e+06	9	6.82688	412	25.9773
SAFTFRVT	Kinesin-like protein KIF1B OS=Mus musculus OX=10090 GN=Kif1b PE=1 SV=2	Kif1b	6710772	8	6.82677	411	25.9142
FSPLNPVRVHI	Heterogeneous nuclear ribonucleoprotein H OS=Mus musculus OX=10090 GN=Hnrnph1 PE=1 SV=3;Heterogeneous nuclear ribonucleoprotein F OS=Mus musculus OX=10090 GN=Hnrnpf PE=1 SV=3	Hnrnph1	6.70124e+06	11	6.82615	410	25.8512
MSADVPLVVE	Proliferating cell nuclear antigen OS=Mus musculus OX=10090 GN=Pcna PE=1 SV=2	Pcna	6.69153e+06	10	6.82553	409	25.7881
PLENAPIGHNR	5,6-dihydroxyindole-2-carboxylic acid oxidase OS=Mus musculus OX=10090 GN=Tyrp1 PE=1 SV=1	Tyrp1	6688455	11	6.82533	408	25.7251
VRVGGSSVDLH	Catenin delta-1 OS=Mus musculus OX=10090 GN=Ctnnd1 PE=1 SV=2	Ctnnd1	6.67785e+06	11	6.82464	407	25.662
AAMLAAQDVAQR	40S ribosomal protein S14 OS=Mus musculus OX=10090 GN=Rps14 PE=1 SV=3	Rps14	6.66957e+06	12	6.8241	406	25.599
RTISNPEVVM	Afadin OS=Mus musculus OX=10090 GN=Afdn PE=1 SV=3	Afdn	6669325	10	6.82408	405	25.5359
SNYLFTKL	Endothelial PAS domain-containing protein 1 OS=Mus musculus OX=10090 GN=Epas1 PE=1 SV=2	Epas1	6649097	8	6.82276	404	25.4729
IKIIAPPERKY	Actin, cytoplasmic 1 OS=Mus musculus OX=10090 GN=Actb PE=1 SV=1;Actin, alpha cardiac muscle 1 OS=Mus musculus OX=10090 GN=Actc1 PE=1 SV=1	Actb	6648553	11	6.82273	403	25.4098
GKDISTNYY	Endoplasmin OS=Mus musculus OX=10090 GN=Hsp90b1 PE=1 SV=2	Hsp90b1	6644864	9	6.82249	402	25.3468
STVVNADQI	ATP-binding cassette sub-family B member 6, mitochondrial OS=Mus musculus OX=10090 GN=Abcb6 PE=1 SV=1	Abcb6	6.62976e+06	9	6.8215	401	25.2837
QLVENTDETY	Tubulin beta-3 chain OS=Mus musculus OX=10090 GN=Tubb3 PE=1 SV=1;Tubulin beta-5 chain OS=Mus musculus OX=10090 GN=Tubb5 PE=1 SV=1;Tubulin beta-4B chain OS=Mus musculus OX=10090 GN=Tubb4b PE=1 SV=1;Tubulin beta-6 chain OS=Mus musculus OX=10090 GN=Tubb6 PE=1 SV=1	Tubb3	6.60308e+06	10	6.81975	400	25.2207
VMVQPINL	Small nuclear ribonucleoprotein E OS=Mus musculus OX=10090 GN=Snrpe PE=1 SV=1	Snrpe	6599742	8	6.81953	399	25.1576
RIDEFESM	Moesin OS=Mus musculus OX=10090 GN=Msn PE=1 SV=3	Msn	6590416	8	6.81891	398	25.0946
YGYSNRVVDL	Glyceraldehyde-3-phosphate dehydrogenase OS=Mus musculus OX=10090 GN=Gapdh PE=1 SV=2	Gapdh	6585354	10	6.81858	397	25.0315
TSDDVKEQIY	40S ribosomal protein S13 OS=Mus musculus OX=10090 GN=Rps13 PE=1 SV=2	Rps13	6584930	10	6.81855	396	24.9685
FDELDSIAKAR	Transitional endoplasmic reticulum ATPase OS=Mus musculus OX=10090 GN=Vcp PE=1 SV=4	Vcp	6577307	11	6.81805	395	24.9054
FSYLNPQEL	F-box/LRR-repeat protein 5 OS=Mus musculus OX=10090 GN=Fbxl5 PE=2 SV=2	Fbxl5	6569380	9	6.81752	394	24.8424
FVKELSEA	Glycine--tRNA ligase OS=Mus musculus OX=10090 GN=Gars1 PE=1 SV=1	Gars1	6.56291e+06	8	6.8171	393	24.7793
RALRLDVGNF	40S ribosomal protein S8 OS=Mus musculus OX=10090 GN=Rps8 PE=1 SV=2	Rps8	6.55177e+06	10	6.81636	392	24.7163
ALDPSFPRM	RNA cytosine C(5)-methyltransferase NSUN2 OS=Mus musculus OX=10090 GN=Nsun2 PE=1 SV=2	Nsun2	6.54943e+06	9	6.8162	391	24.6532
RSVDNIQFL	Sugar transporter SWEET1 OS=Mus musculus OX=10090 GN=Slc50a1 PE=2 SV=1	Slc50a1	6.54254e+06	9	6.81575	390	24.5902
GLEPEEKLR	IgE-binding protein OS=Mus musculus OX=10090 GN=Iap PE=2 SV=1	Iap	6525598	9	6.81462	389	24.5271
LIDLPGHES	Signal recognition particle receptor subunit beta OS=Mus musculus OX=10090 GN=Srprb PE=1 SV=1	Srprb	6.50312e+06	9	6.81312	388	24.4641
HEQLSVAEITN	Tubulin alpha-1A chain OS=Mus musculus OX=10090 GN=Tuba1a PE=1 SV=1	Tuba1a	6499618	11	6.81289	387	24.401
RMGESDDSIL	40S ribosomal protein S21 OS=Mus musculus OX=10090 GN=Rps21 PE=1 SV=1	Rps21	6.49879e+06	10	6.81283	386	24.338
SLVDLNTRL	Mitochondrial amidoxime reducing component 2 OS=Mus musculus OX=10090 GN=Mtarc2 PE=1 SV=1	Mtarc2	6492397	9	6.81241	385	24.2749
DEDPRNTQTSQI	BRISC complex subunit Abraxas 2 OS=Mus musculus OX=10090 GN=Abraxas2 PE=1 SV=1	Abraxas2	6486673	12	6.81202	384	24.2119
RFTDEESRVF	Bcl-2-associated transcription factor 1 OS=Mus musculus OX=10090 GN=Bclaf1 PE=1 SV=2	Bclaf1	6477755	10	6.81142	383	24.1488
ALPGDNVGFNVK	Elongation factor 1-alpha 1 OS=Mus musculus OX=10090 GN=Eef1a1 PE=1 SV=3	Eef1a1	6.46233e+06	12	6.81039	382	24.0858
EVDEQMLNVQNK	Tubulin beta-5 chain OS=Mus musculus OX=10090 GN=Tubb5 PE=1 SV=1;Tubulin beta-4B chain OS=Mus musculus OX=10090 GN=Tubb4b PE=1 SV=1	Tubb5	6457799	12	6.81008	381	24.0227
LEQRFLEL	Interphotoreceptor matrix proteoglycan 2 OS=Mus musculus OX=10090 GN=Impg2 PE=1 SV=1	Impg2	6453747	8	6.80981	380	23.9596
KNTTPDELL	3-ketoacyl-CoA thiolase A, peroxisomal OS=Mus musculus OX=10090 GN=Acaa1a PE=1 SV=1	Acaa1a	6449783	9	6.80955	379	23.8966
TQLTGPVMPIR	60S ribosomal protein L13 OS=Mus musculus OX=10090 GN=Rpl13 PE=1 SV=3	Rpl13	6443265	11	6.80911	378	23.8335
NLDIERPTYTNL	Tubulin alpha-8 chain OS=Mus musculus OX=10090 GN=Tuba8 PE=1 SV=1;Tubulin alpha-1A chain OS=Mus musculus OX=10090 GN=Tuba1a PE=1 SV=1;Tubulin alpha-1C chain OS=Mus musculus OX=10090 GN=Tuba1c PE=1 SV=1	Tuba8	6419402	12	6.80749	377	23.7705
FRDGPPLRGSNM	Eukaryotic translation initiation factor 4H OS=Mus musculus OX=10090 GN=Eif4h PE=1 SV=3	Eif4h	6.41244e+06	12	6.80702	376	23.7074
FMVEKGPTL	Ubiquitin-conjugating enzyme E2 J2 OS=Mus musculus OX=10090 GN=Ube2j2 PE=1 SV=1	Ube2j2	6.40996e+06	9	6.80686	375	23.6444
SITREAQVNVR	Thyroid hormone receptor-associated protein 3 OS=Mus musculus OX=10090 GN=Thrap3 PE=1 SV=1	Thrap3	6394506	11	6.80581	374	23.5813
DNIQGITKPAIR	Histone H4 OS=Mus musculus OX=10090 GN=H4c1 PE=1 SV=2	H4c1	6.38729e+06	12	6.80532	373	23.5183
FSLINGDDM	Mucolipin-1 OS=Mus musculus OX=10090 GN=Mcoln1 PE=1 SV=1	Mcoln1	6.37018e+06	9	6.80415	372	23.4552
FGGSNVHVI	Fatty acid synthase OS=Mus musculus OX=10090 GN=Fasn PE=1 SV=2	Fasn	6.35505e+06	9	6.80312	371	23.3922
RLIFGVDDESVQ	Immunity-related GTPase family M protein 1 OS=Mus musculus OX=10090 GN=Irgm1 PE=1 SV=1	Irgm1	6.34733e+06	12	6.80259	370	23.3291
DATSKVALVY	ATP synthase subunit beta, mitochondrial OS=Mus musculus OX=10090 GN=Atp5f1b PE=1 SV=2	Atp5f1b	6.33162e+06	10	6.80151	369	23.2661
VFGEESNEFT	Inositol polyphosphate 1-phosphatase OS=Mus musculus OX=10090 GN=Inpp1 PE=1 SV=2	Inpp1	6.32866e+06	10	6.80131	368	23.203
HDLEGPPLDAY	Poly(rC)-binding protein 1 OS=Mus musculus OX=10090 GN=Pcbp1 PE=1 SV=1	Pcbp1	6.32041e+06	11	6.80075	367	23.14
VKAPLVLKD	Parkinson disease protein 7 homolog OS=Mus musculus OX=10090 GN=Park7 PE=1 SV=1	Park7	6300600	9	6.79938	366	23.0769
LIEDTEDWRP	PDZ and LIM domain protein 5 OS=Mus musculus OX=10090 GN=Pdlim5 PE=1 SV=4	Pdlim5	6.29052e+06	10	6.79869	365	23.0139
TGVVNGESL	Protein HIRA OS=Mus musculus OX=10090 GN=Hira PE=1 SV=3	Hira	6287834	9	6.7985	364	22.9508
HGYTFANL	SUMO-activating enzyme subunit 1 OS=Mus musculus OX=10090 GN=Sae1 PE=1 SV=1	Sae1	6.26757e+06	8	6.7971	363	22.8878
AALQNAVAF	E3 ubiquitin-protein ligase TRIM56 OS=Mus musculus OX=10090 GN=Trim56 PE=1 SV=1	Trim56	6.26434e+06	9	6.79688	362	22.8247
SKYSEAAELRST	A-kinase anchor protein 2 OS=Mus musculus OX=10090 GN=Akap2 PE=1 SV=3	Akap2	6255751	12	6.79628	361	22.7617
KTVDGPSGKLW	Glyceraldehyde-3-phosphate dehydrogenase OS=Mus musculus OX=10090 GN=Gapdh PE=1 SV=2	Gapdh	6255001	11	6.79623	360	22.6986
YKDDPVDL	Thyroid hormone receptor-associated protein 3 OS=Mus musculus OX=10090 GN=Thrap3 PE=1 SV=1	Thrap3	6249212	8	6.79583	359	22.6356
LAVAQNTYA	Major facilitator superfamily domain-containing protein 1 OS=Mus musculus OX=10090 GN=Mfsd1 PE=1 SV=1	Mfsd1	6.2328e+06	9	6.79468	358	22.5725
LMERLSVDY	Tubulin alpha-1A chain OS=Mus musculus OX=10090 GN=Tuba1a PE=1 SV=1;Tubulin alpha-1C chain OS=Mus musculus OX=10090 GN=Tuba1c PE=1 SV=1	Tuba1a	6.22098e+06	9	6.79386	357	22.5095
GPGIGAILER	Myelin expression factor 2 OS=Mus musculus OX=10090 GN=Myef2 PE=1 SV=1	Myef2	6209194	10	6.79304	356	22.4464
LLPGELAK	Histone H2B type 1-B OS=Mus musculus OX=10090 GN=H2bc3 PE=1 SV=3;Histone H2B type 1-F/J/L OS=Mus musculus OX=10090 GN=H2bc7 PE=1 SV=2	H2bc3	6.20458e+06	8	6.79271	355	22.3834
AEVVRFLG	Spermatogenesis-associated protein 31 OS=Mus musculus OX=10090 GN=Spata31 PE=1 SV=1	Spata31	6187493	8	6.79151	354	22.3203
AFLIEEQKIVVK	60S ribosomal protein L34 OS=Mus musculus OX=10090 GN=Rpl34 PE=1 SV=2	Rpl34	6184589	12	6.79131	353	22.2573
RDDGQDRRAR	Atrial natriuretic peptide receptor 1 OS=Mus musculus OX=10090 GN=Npr1 PE=1 SV=2	Npr1	6162079	10	6.78973	352	22.1942
RQYMFSSL	X-ray repair cross-complementing protein 5 OS=Mus musculus OX=10090 GN=Xrcc5 PE=1 SV=4	Xrcc5	6159208	8	6.78952	351	22.1311
FLQALGLG	Neuromedin-U receptor 1 OS=Mus musculus OX=10090 GN=Nmur1 PE=2 SV=2	Nmur1	6159032	8	6.78951	350	22.0681
LDLAKLNQVAR	Poly(rC)-binding protein 1 OS=Mus musculus OX=10090 GN=Pcbp1 PE=1 SV=1	Pcbp1	6.14075e+06	11	6.78822	349	22.005
NNQSSNFGP	Heterogeneous nuclear ribonucleoprotein A1 OS=Mus musculus OX=10090 GN=Hnrnpa1 PE=1 SV=2	Hnrnpa1	6.12384e+06	9	6.78702	348	21.942
AIEENNNFSK	Stathmin OS=Mus musculus OX=10090 GN=Stmn1 PE=1 SV=2	Stmn1	6.09202e+06	10	6.78476	347	21.8789
NSLLNNMEL	Calcium-binding mitochondrial carrier protein Aralar1 OS=Mus musculus OX=10090 GN=Slc25a12 PE=1 SV=1	Slc25a12	6.08358e+06	9	6.78416	346	21.8159
KLTELENELNTK	Afadin OS=Mus musculus OX=10090 GN=Afdn PE=1 SV=3	Afdn	6.08048e+06	12	6.78394	345	21.7528
AQIENSAAV	Guanylate-binding protein 2 OS=Mus musculus OX=10090 GN=Gbp2 PE=1 SV=1	Gbp2	6.06111e+06	9	6.78255	344	21.6898
FEQKTLTPEQW	BolA-like protein 2 OS=Mus musculus OX=10090 GN=Bola2 PE=1 SV=1	Bola2	6.05876e+06	11	6.78238	343	21.6267
ILQSSSEVGYDA	60 kDa heat shock protein, mitochondrial OS=Mus musculus OX=10090 GN=Hspd1 PE=1 SV=1	Hspd1	6057804	12	6.78232	342	21.5637
KVFPGSTTEDY	Transcription intermediary factor 1-beta OS=Mus musculus OX=10090 GN=Trim28 PE=1 SV=3	Trim28	6.05033e+06	11	6.78178	341	21.5006
VDLEPGTMDSVR	Tubulin beta-3 chain OS=Mus musculus OX=10090 GN=Tubb3 PE=1 SV=1;Tubulin beta-5 chain OS=Mus musculus OX=10090 GN=Tubb5 PE=1 SV=1;Tubulin beta-4B chain OS=Mus musculus OX=10090 GN=Tubb4b PE=1 SV=1;Tubulin beta-6 chain OS=Mus musculus OX=10090 GN=Tubb6 PE=1 SV=1	Tubb3	6.0371e+06	12	6.78083	340	21.4376
GGHVNLTML	Succinyl-CoA:3-ketoacid coenzyme A transferase 1, mitochondrial OS=Mus musculus OX=10090 GN=Oxct1 PE=1 SV=1	Oxct1	6.03661e+06	9	6.78079	339	21.3745
AWLQVSPV	Transmembrane protein 87A OS=Mus musculus OX=10090 GN=Tmem87a PE=1 SV=1	Tmem87a	6034878	8	6.78067	338	21.3115
KSERGIDTL	Partner and localizer of BRCA2 OS=Mus musculus OX=10090 GN=Palb2 PE=1 SV=2	Palb2	6033964	9	6.7806	337	21.2484
SKKDWYDVKAP	40S ribosomal protein S3a OS=Mus musculus OX=10090 GN=Rps3a PE=1 SV=3	Rps3a	6033909	11	6.7806	336	21.1854
HEGPAFLTW	5,6-dihydroxyindole-2-carboxylic acid oxidase OS=Mus musculus OX=10090 GN=Tyrp1 PE=1 SV=1	Tyrp1	6033669	9	6.78058	335	21.1223
VITNLEFEV	Ubiquitin carboxyl-terminal hydrolase 37 OS=Mus musculus OX=10090 GN=Usp37 PE=1 SV=1	Usp37	6031363	9	6.78042	334	21.0593
LDDMDVKKGVS	Dynein heavy chain 5, axonemal OS=Mus musculus OX=10090 GN=Dnah5 PE=1 SV=2	Dnah5	6.03049e+06	11	6.78035	333	20.9962
RSWDSEEILEG	Asparagine--tRNA ligase, cytoplasmic OS=Mus musculus OX=10090 GN=NARS1 PE=1 SV=2	NARS1	5.99935e+06	11	6.7781	332	20.9332
AFIAHPKL	60S ribosomal protein L29 OS=Mus musculus OX=10090 GN=Rpl29 PE=1 SV=2	Rpl29	5999170	8	6.77809	331	20.8701
LTPEEEEILNKK	40S ribosomal protein S8 OS=Mus musculus OX=10090 GN=Rps8 PE=1 SV=2	Rps8	5998925	12	6.77807	330	20.8071
FSYMGPSQRPL	Transcription factor SOX-10 OS=Mus musculus OX=10090 GN=Sox10 PE=1 SV=2	Sox10	5.99567e+06	11	6.77784	329	20.744
RALEKIDL	60S ribosomal protein L3 OS=Mus musculus OX=10090 GN=Rpl3 PE=1 SV=3	Rpl3	5987750	8	6.77726	328	20.681
VAVVNKVDI	NPC intracellular cholesterol transporter 1 OS=Mus musculus OX=10090 GN=Npc1 PE=1 SV=2	Npc1	5.97177e+06	9	6.7761	327	20.6179
FINNNLHTQNL	Baculoviral IAP repeat-containing protein 6 OS=Mus musculus OX=10090 GN=Birc6 PE=1 SV=2	Birc6	5.95963e+06	11	6.77522	326	20.5549
SSPEVKGYW	Poly(rC)-binding protein 2 OS=Mus musculus OX=10090 GN=Pcbp2 PE=1 SV=1;Poly(rC)-binding protein 1 OS=Mus musculus OX=10090 GN=Pcbp1 PE=1 SV=1	Pcbp2	5957169	9	6.77504	325	20.4918
SGYDFENRL	Tetratricopeptide repeat protein 39C OS=Mus musculus OX=10090 GN=Ttc39c PE=1 SV=2	Ttc39c	5954826	9	6.77487	324	20.4288
DIERPTYTNL	Tubulin alpha-8 chain OS=Mus musculus OX=10090 GN=Tuba8 PE=1 SV=1;Tubulin alpha-1A chain OS=Mus musculus OX=10090 GN=Tuba1a PE=1 SV=1;Tubulin alpha-1C chain OS=Mus musculus OX=10090 GN=Tuba1c PE=1 SV=1	Tuba8	5.949e+06	10	6.77444	323	20.3657
YSQVLANGLDNK	40S ribosomal protein S18 OS=Mus musculus OX=10090 GN=Rps18 PE=1 SV=3	Rps18	5.9481e+06	12	6.77438	322	20.3026
APSRQDVYGP	Catenin delta-1 OS=Mus musculus OX=10090 GN=Ctnnd1 PE=1 SV=2	Ctnnd1	5.94029e+06	10	6.77381	321	20.2396
SVSFADDFVRSS	Serpin H1 OS=Mus musculus OX=10090 GN=Serpinh1 PE=1 SV=3	Serpinh1	5932370	12	6.77323	320	20.1765
SKIREEYPDRIM	Tubulin beta-5 chain OS=Mus musculus OX=10090 GN=Tubb5 PE=1 SV=1;Tubulin beta-4B chain OS=Mus musculus OX=10090 GN=Tubb4b PE=1 SV=1;Tubulin beta-6 chain OS=Mus musculus OX=10090 GN=Tubb6 PE=1 SV=1	Tubb5	5925848	12	6.77275	319	20.1135
MAAVRALNL	DNA mismatch repair protein Msh2 OS=Mus musculus OX=10090 GN=Msh2 PE=1 SV=1	Msh2	5.92322e+06	9	6.77256	318	20.0504
KKLTGKDVNF	40S ribosomal protein S7 OS=Mus musculus OX=10090 GN=Rps7 PE=2 SV=1	Rps7	5.91252e+06	10	6.77177	317	19.9874
YGGGNYGP	Heterogeneous nuclear ribonucleoproteins A2/B1 OS=Mus musculus OX=10090 GN=Hnrnpa2b1 PE=1 SV=2	Hnrnpa2b1	5904069	8	6.77115	316	19.9243
VAVTFSERL	Cystine/glutamate transporter OS=Mus musculus OX=10090 GN=Slc7a11 PE=1 SV=1	Slc7a11	5902562	9	6.77104	315	19.8613
AHYPSQPVFAPM	Ataxin-2-like protein OS=Mus musculus OX=10090 GN=Atxn2l PE=1 SV=1	Atxn2l	5.8962e+06	12	6.77057	314	19.7982
NKLGPNEQY	Cytochrome c oxidase subunit NDUFA4 OS=Mus musculus OX=10090 GN=Ndufa4 PE=1 SV=2	Ndufa4	5881903	9	6.76952	313	19.7352
KLITPAVVSERL	40S ribosomal protein S25 OS=Mus musculus OX=10090 GN=Rps25 PE=1 SV=1	Rps25	5881485	12	6.76949	312	19.6721
VLRDNIQGITKP	Histone H4 OS=Mus musculus OX=10090 GN=H4c1 PE=1 SV=2	H4c1	5.87968e+06	12	6.76935	311	19.6091
AAPTPPPDS	ATP-dependent RNA helicase DDX18 OS=Mus musculus OX=10090 GN=Ddx18 PE=1 SV=1	Ddx18	5.87618e+06	9	6.76909	310	19.546
AGLQFPVGR	Histone H2A.Z OS=Mus musculus OX=10090 GN=H2az1 PE=1 SV=2;Histone H2AX OS=Mus musculus OX=10090 GN=H2ax PE=1 SV=2	H2az1	5871668	9	6.76876	309	19.483
AIMPNGDHI	Platelet-activating factor acetylhydrolase IB subunit alpha OS=Mus musculus OX=10090 GN=Pafah1b1 PE=1 SV=2	Pafah1b1	5.85729e+06	9	6.7677	308	19.4199
YHEQLSVAEITN	Tubulin alpha-1A chain OS=Mus musculus OX=10090 GN=Tuba1a PE=1 SV=1	Tuba1a	5843440	12	6.76667	307	19.3569
FTTDLFGRDLS	Heterogeneous nuclear ribonucleoprotein F OS=Mus musculus OX=10090 GN=Hnrnpf PE=1 SV=3	Hnrnpf	5842231	11	6.76658	306	19.2938
TPVEPEVAIHR	40S ribosomal protein S20 OS=Mus musculus OX=10090 GN=Rps20 PE=1 SV=1	Rps20	5.8292e+06	11	6.76561	305	19.2308
ELNGKLTGM	Glyceraldehyde-3-phosphate dehydrogenase OS=Mus musculus OX=10090 GN=Gapdh PE=1 SV=2	Gapdh	5.81499e+06	9	6.76455	304	19.1677
LGDDPLSR	Eukaryotic translation initiation factor 3 subunit A OS=Mus musculus OX=10090 GN=Eif3a PE=1 SV=5	Eif3a	5.80358e+06	8	6.7637	303	19.1047
TAVVNVTYM	Insulin-like growth factor 2 mRNA-binding protein 2 OS=Mus musculus OX=10090 GN=Igf2bp2 PE=1 SV=1	Igf2bp2	5799871	9	6.76342	302	19.0416
AQVAEIAEEL	Cytoplasmic dynein 2 heavy chain 1 OS=Mus musculus OX=10090 GN=Dync2h1 PE=1 SV=1	Dync2h1	5796304	10	6.76315	301	18.9786
DHPIVETL	Heat shock protein HSP 90-beta OS=Mus musculus OX=10090 GN=Hsp90ab1 PE=1 SV=3	Hsp90ab1	5.79308e+06	8	6.76291	300	18.9155
FKGQILMP	60S ribosomal protein L32 OS=Mus musculus OX=10090 GN=Rpl32 PE=1 SV=2	Rpl32	5.79248e+06	8	6.76286	299	18.8525
FQTMEEKKAF	60S ribosomal protein L3 OS=Mus musculus OX=10090 GN=Rpl3 PE=1 SV=3	Rpl3	5.79178e+06	10	6.76281	298	18.7894
VVAEFGRI	COMM domain-containing protein 2 OS=Mus musculus OX=10090 GN=Commd2 PE=1 SV=1	Commd2	5786977	8	6.76245	297	18.7264
GLDDDRGPWR	Eukaryotic translation initiation factor 3 subunit A OS=Mus musculus OX=10090 GN=Eif3a PE=1 SV=5	Eif3a	5.78268e+06	10	6.76213	296	18.6633
KLEADLEGK	Centrosomal protein of 162 kDa OS=Mus musculus OX=10090 GN=Cep162 PE=1 SV=2	Cep162	5768708	9	6.76108	295	18.6003
KSFEWLSQM	Cytoplasmic dynein 1 heavy chain 1 OS=Mus musculus OX=10090 GN=Dync1h1 PE=1 SV=2	Dync1h1	5763623	9	6.7607	294	18.5372
YDESGPSIVH	Actin, cytoplasmic 1 OS=Mus musculus OX=10090 GN=Actb PE=1 SV=1	Actb	5761853	10	6.76056	293	18.4741
TLETVPLER	Heterogeneous nuclear ribonucleoproteins A2/B1 OS=Mus musculus OX=10090 GN=Hnrnpa2b1 PE=1 SV=2	Hnrnpa2b1	5.76101e+06	9	6.7605	292	18.4111
VKLISWYDNE	Glyceraldehyde-3-phosphate dehydrogenase OS=Mus musculus OX=10090 GN=Gapdh PE=1 SV=2	Gapdh	5.74965e+06	10	6.75964	291	18.348
YLKIKTVTLEY	Mitochondrial 10-formyltetrahydrofolate dehydrogenase OS=Mus musculus OX=10090 GN=Aldh1l2 PE=1 SV=2	Aldh1l2	5.74642e+06	11	6.7594	290	18.285
LPGRFSHL	Tumor necrosis factor-inducible gene 6 protein OS=Mus musculus OX=10090 GN=Tnfaip6 PE=2 SV=1	Tnfaip6	5.73444e+06	8	6.75849	289	18.2219
SGKYDLDFK	Alpha-enolase OS=Mus musculus OX=10090 GN=Eno1 PE=1 SV=3	Eno1	5727519	9	6.75797	288	18.1589
LLNASGSTSTP	ATP-citrate synthase OS=Mus musculus OX=10090 GN=Acly PE=1 SV=1	Acly	5720844	11	6.75746	287	18.0958
VTIIDAPGHR	Elongation factor 1-alpha 1 OS=Mus musculus OX=10090 GN=Eef1a1 PE=1 SV=3	Eef1a1	5.69774e+06	10	6.7557	286	18.0328
RHPYFYAPELL	Albumin OS=Mus musculus OX=10090 GN=Alb PE=1 SV=3	Alb	5.68823e+06	11	6.75498	285	17.9697
RKIEEIKDFLL	60S ribosomal protein L38 OS=Mus musculus OX=10090 GN=Rpl38 PE=1 SV=3	Rpl38	5.66964e+06	11	6.75356	284	17.9067
TLLIKTVETRDG	Vimentin OS=Mus musculus OX=10090 GN=Vim PE=1 SV=3	Vim	5635239	12	6.75091	283	17.8436
AIIKFPLTTE	60S ribosomal protein L23a OS=Mus musculus OX=10090 GN=Rpl23a PE=1 SV=1	Rpl23a	5.62937e+06	10	6.75046	282	17.7806
HEQLSVAEITNA	Tubulin alpha-1A chain OS=Mus musculus OX=10090 GN=Tuba1a PE=1 SV=1	Tuba1a	5617984	12	6.74958	281	17.7175
YYKVDENGKISR	Ubiquitin-40S ribosomal protein S27a OS=Mus musculus OX=10090 GN=Rps27a PE=1 SV=2	Rps27a	5.61658e+06	12	6.74947	280	17.6545
SQMRKDVL	PRKCA-binding protein OS=Mus musculus OX=10090 GN=Pick1 PE=1 SV=2	Pick1	5.60079e+06	8	6.74825	279	17.5914
VGIVGKYGTRY	60S ribosomal protein L37a OS=Mus musculus OX=10090 GN=Rpl37a PE=1 SV=2	Rpl37a	5.59631e+06	11	6.7479	278	17.5284
FVSDVVISSDGQ	Receptor of activated protein C kinase 1 OS=Mus musculus OX=10090 GN=Rack1 PE=1 SV=3	Rack1	5593653	12	6.7477	277	17.4653
FAQNNVTEI	Solute carrier family 12 member 7 OS=Mus musculus OX=10090 GN=Slc12a7 PE=1 SV=1	Slc12a7	5592742	9	6.74762	276	17.4023
RTIGISVDPRRR	60S ribosomal protein L13 OS=Mus musculus OX=10090 GN=Rpl13 PE=1 SV=3	Rpl13	5.57045e+06	12	6.74589	275	17.3392
EESERRAKE	Merlin OS=Mus musculus OX=10090 GN=Nf2 PE=1 SV=2	Nf2	5562806	9	6.74529	274	17.2762
ALEIANAH	60 kDa heat shock protein, mitochondrial OS=Mus musculus OX=10090 GN=Hspd1 PE=1 SV=1	Hspd1	5.5602e+06	8	6.74509	273	17.2131
GHAVGDIPGVRF	40S ribosomal protein S23 OS=Mus musculus OX=10090 GN=Rps23 PE=1 SV=3	Rps23	5.55478e+06	12	6.74467	272	17.1501
GVERMGAGMGF	Heterogeneous nuclear ribonucleoprotein M OS=Mus musculus OX=10090 GN=Hnrnpm PE=1 SV=3	Hnrnpm	5.55383e+06	11	6.74459	271	17.087
VHTGLGELLR	Serpin H1 OS=Mus musculus OX=10090 GN=Serpinh1 PE=1 SV=3	Serpinh1	5551170	10	6.74438	270	17.024
YQEFTDHLVKTH	40S ribosomal protein S2 OS=Mus musculus OX=10090 GN=Rps2 PE=1 SV=3	Rps2	5529726	12	6.7427	269	16.9609
SFADDFVRSS	Serpin H1 OS=Mus musculus OX=10090 GN=Serpinh1 PE=1 SV=3	Serpinh1	5.51815e+06	10	6.74179	268	16.8979
FADDFVRS	Serpin H1 OS=Mus musculus OX=10090 GN=Serpinh1 PE=1 SV=3	Serpinh1	5.50718e+06	8	6.74093	267	16.8348
IEESIDRVY	DNA replication licensing factor MCM6 OS=Mus musculus OX=10090 GN=Mcm6 PE=1 SV=1	Mcm6	5499112	9	6.74029	266	16.7718
LGGAVFGALQ	Actin-related protein 10 OS=Mus musculus OX=10090 GN=Actr10 PE=1 SV=2	Actr10	5.49859e+06	10	6.74025	265	16.7087
GRGFGDGYNGY	Heterogeneous nuclear ribonucleoproteins A2/B1 OS=Mus musculus OX=10090 GN=Hnrnpa2b1 PE=1 SV=2	Hnrnpa2b1	5.48539e+06	11	6.73921	264	16.6456
AGVEGSLIVEK	60 kDa heat shock protein, mitochondrial OS=Mus musculus OX=10090 GN=Hspd1 PE=1 SV=1	Hspd1	5466711	11	6.73773	263	16.5826
STTTGHLIYK	Elongation factor 1-alpha 1 OS=Mus musculus OX=10090 GN=Eef1a1 PE=1 SV=3	Eef1a1	5462405	10	6.73738	262	16.5195
QTVAVGVIKAVD	Elongation factor 1-alpha 1 OS=Mus musculus OX=10090 GN=Eef1a1 PE=1 SV=3	Eef1a1	5452512	12	6.7366	261	16.4565
AQINQGESITHA	Adenylyl cyclase-associated protein 1 OS=Mus musculus OX=10090 GN=Cap1 PE=1 SV=4	Cap1	5.41568e+06	12	6.73365	260	16.3934
RQKFSDLKLNGP	Catenin delta-1 OS=Mus musculus OX=10090 GN=Ctnnd1 PE=1 SV=2	Ctnnd1	5.41189e+06	12	6.73335	259	16.3304
AFTRGEVF	Tight junction protein ZO-2 OS=Mus musculus OX=10090 GN=Tjp2 PE=1 SV=2	Tjp2	5403975	8	6.73271	258	16.2673
IIDVVRSGYY	60S ribosomal protein L27a OS=Mus musculus OX=10090 GN=Rpl27a PE=1 SV=5	Rpl27a	5403856	10	6.7327	257	16.2043
LTSDDVKEQIY	40S ribosomal protein S13 OS=Mus musculus OX=10090 GN=Rps13 PE=1 SV=2	Rps13	5.39578e+06	11	6.73205	256	16.1412
SALRFLNL	Serine/threonine-protein kinase 11-interacting protein OS=Mus musculus OX=10090 GN=Stk11ip PE=1 SV=1	Stk11ip	5.3872e+06	8	6.73136	255	16.0782
KVTLNGFLDTL	Dystrobrevin alpha OS=Mus musculus OX=10090 GN=Dtna PE=1 SV=2	Dtna	5.37932e+06	11	6.73073	254	16.0151
RTYSFLNL	Transmembrane protein 39B OS=Mus musculus OX=10090 GN=Tmem39b PE=1 SV=1	Tmem39b	5.346e+06	8	6.72803	253	15.9521
TVINQTQKENLR	60S ribosomal protein L35 OS=Mus musculus OX=10090 GN=Rpl35 PE=1 SV=1	Rpl35	5.34349e+06	12	6.72783	252	15.889
KVKLAVLKY	Ubiquitin-40S ribosomal protein S27a OS=Mus musculus OX=10090 GN=Rps27a PE=1 SV=2	Rps27a	5.33353e+06	9	6.72701	251	15.826
SLVLYPIKFIET	Transmembrane protein 47 OS=Mus musculus OX=10090 GN=Tmem47 PE=1 SV=1	Tmem47	5325512	12	6.72636	250	15.7629
RGFGDGYNGY	Heterogeneous nuclear ribonucleoproteins A2/B1 OS=Mus musculus OX=10090 GN=Hnrnpa2b1 PE=1 SV=2	Hnrnpa2b1	5317560	10	6.72571	249	15.6999
YGGGPGGGNFG	Heterogeneous nuclear ribonucleoproteins A2/B1 OS=Mus musculus OX=10090 GN=Hnrnpa2b1 PE=1 SV=2	Hnrnpa2b1	5.31618e+06	11	6.7256	248	15.6368
TLHLQTGNLL	Glutamate--cysteine ligase regulatory subunit OS=Mus musculus OX=10090 GN=Gclm PE=1 SV=1	Gclm	5.31305e+06	10	6.72534	247	15.5738
KRHMITHSEK	PR domain zinc finger protein 5 OS=Mus musculus OX=10090 GN=Prdm5 PE=2 SV=2	Prdm5	5.3113e+06	10	6.7252	246	15.5107
SALENHPFTL	NADPH oxidase 4 OS=Mus musculus OX=10090 GN=Nox4 PE=1 SV=1	Nox4	5290646	10	6.72351	245	15.4477
KNYDFAQVL	PAN2-PAN3 deadenylation complex catalytic subunit Pan2 OS=Mus musculus OX=10090 GN=Pan2 PE=1 SV=1	Pan2	5286635	9	6.72318	244	15.3846
RSYTVGVTM	Serpin H1 OS=Mus musculus OX=10090 GN=Serpinh1 PE=1 SV=3	Serpinh1	5280263	9	6.72266	243	15.3216
SQIGNLEAL	DISP complex protein LRCH3 OS=Mus musculus OX=10090 GN=Lrch3 PE=1 SV=3	Lrch3	5.27231e+06	9	6.722	242	15.2585
PAANTKIGPR	40S ribosomal protein S8 OS=Mus musculus OX=10090 GN=Rps8 PE=1 SV=2	Rps8	5.25769e+06	10	6.72079	241	15.1955
YSIQGQHTI	Poly(rC)-binding protein 1 OS=Mus musculus OX=10090 GN=Pcbp1 PE=1 SV=1	Pcbp1	5252341	9	6.72035	240	15.1324
ITEFSDITRR	Lamina-associated polypeptide 2, isoforms beta/delta/epsilon/gamma OS=Mus musculus OX=10090 GN=Tmpo PE=1 SV=4	Tmpo	5250676	10	6.72022	239	15.0694
SLGGYVLSL	Tyrosine-protein kinase ZAP-70 OS=Mus musculus OX=10090 GN=Zap70 PE=1 SV=3	Zap70	5.24615e+06	9	6.71984	238	15.0063
KRVLALSVETEY	60S acidic ribosomal protein P0 OS=Mus musculus OX=10090 GN=Rplp0 PE=1 SV=3	Rplp0	5.24443e+06	12	6.7197	237	14.9433
SSSHSDNLT	Transcription cofactor vestigial-like protein 1 OS=Mus musculus OX=10090 GN=Vgll1 PE=1 SV=1	Vgll1	5231043	9	6.71859	236	14.8802
LLEVEHPAAK	T-complex protein 1 subunit alpha OS=Mus musculus OX=10090 GN=Tcp1 PE=1 SV=3	Tcp1	5.21938e+06	10	6.71762	235	14.8172
IITEGFEAAKEK	T-complex protein 1 subunit zeta OS=Mus musculus OX=10090 GN=Cct6a PE=1 SV=3	Cct6a	5.20351e+06	12	6.7163	234	14.7541
VAEKLEALSVR	Ran-specific GTPase-activating protein OS=Mus musculus OX=10090 GN=Ranbp1 PE=1 SV=2	Ranbp1	5198922	11	6.71591	233	14.691
SQKKTFEINP	Endoplasmin OS=Mus musculus OX=10090 GN=Hsp90b1 PE=1 SV=2	Hsp90b1	5.19707e+06	10	6.71576	232	14.628
AGAGIALNDN	Glyceraldehyde-3-phosphate dehydrogenase OS=Mus musculus OX=10090 GN=Gapdh PE=1 SV=2	Gapdh	5172060	10	6.71366	231	14.5649
VAVGVIKAVDKK	Elongation factor 1-alpha 1 OS=Mus musculus OX=10090 GN=Eef1a1 PE=1 SV=3	Eef1a1	5.16888e+06	12	6.7134	230	14.5019
LKVGLQVVAVK	60 kDa heat shock protein, mitochondrial OS=Mus musculus OX=10090 GN=Hspd1 PE=1 SV=1	Hspd1	5.16336e+06	11	6.71293	229	14.4388
GFGDSFGR	Myelin expression factor 2 OS=Mus musculus OX=10090 GN=Myef2 PE=1 SV=1	Myef2	5.13285e+06	8	6.71036	228	14.3758
VAVGVIKAVD	Elongation factor 1-alpha 1 OS=Mus musculus OX=10090 GN=Eef1a1 PE=1 SV=3	Eef1a1	5.12573e+06	10	6.70976	227	14.3127
TTDLFGRDLS	Heterogeneous nuclear ribonucleoprotein F OS=Mus musculus OX=10090 GN=Hnrnpf PE=1 SV=3	Hnrnpf	5.12108e+06	10	6.70936	226	14.2497
EVPEELTGQTN	Calpain-2 catalytic subunit OS=Mus musculus OX=10090 GN=Capn2 PE=1 SV=4	Capn2	5.10362e+06	11	6.70788	225	14.1866
YLKDVTLKK	60S ribosomal protein L17 OS=Mus musculus OX=10090 GN=Rpl17 PE=1 SV=3	Rpl17	5099502	9	6.70753	224	14.1236
GFGQGAGALVH	Cysteine and glycine-rich protein 1 OS=Mus musculus OX=10090 GN=Csrp1 PE=1 SV=3	Csrp1	5095963	11	6.70723	223	14.0605
KALMVYFH	EF-hand calcium-binding domain-containing protein 9 OS=Mus musculus OX=10090 GN=Efcab9 PE=1 SV=2	Efcab9	5091417	8	6.70684	222	13.9975
GANNLERMGLE	Heterogeneous nuclear ribonucleoprotein M OS=Mus musculus OX=10090 GN=Hnrnpm PE=1 SV=3	Hnrnpm	5.08534e+06	11	6.70632	221	13.9344
SRASINSLLSDK	Copper-transporting ATPase 1 OS=Mus musculus OX=10090 GN=Atp7a PE=1 SV=3	Atp7a	5.05946e+06	12	6.7041	220	13.8714
IHVGQAGVQIGN	Tubulin alpha-1A chain OS=Mus musculus OX=10090 GN=Tuba1a PE=1 SV=1;Tubulin alpha-1C chain OS=Mus musculus OX=10090 GN=Tuba1c PE=1 SV=1	Tuba1a	5.04241e+06	12	6.70264	219	13.8083
AFAHITGGGLLE	Trifunctional purine biosynthetic protein adenosine-3 OS=Mus musculus OX=10090 GN=Gart PE=1 SV=3	Gart	5.0343e+06	12	6.70194	218	13.7453
TSLPAERIQEIQ	Glycylpeptide N-tetradecanoyltransferase 1 OS=Mus musculus OX=10090 GN=Nmt1 PE=1 SV=1	Nmt1	5.03082e+06	12	6.70164	217	13.6822
EVYLLVKS	Heat-stable enterotoxin receptor OS=Mus musculus OX=10090 GN=Gucy2c PE=2 SV=1	Gucy2c	5.02926e+06	8	6.7015	216	13.6192
IEVDIDVEHGGK	Sequestosome-1 OS=Mus musculus OX=10090 GN=Sqstm1 PE=1 SV=1	Sqstm1	5.02038e+06	12	6.70074	215	13.5561
MVIDVLHPGK	40S ribosomal protein S24 OS=Mus musculus OX=10090 GN=Rps24 PE=1 SV=1	Rps24	4999666	10	6.69894	214	13.4931
KVVDPFSK	40S ribosomal protein S3a OS=Mus musculus OX=10090 GN=Rps3a PE=1 SV=3	Rps3a	4.98894e+06	8	6.69801	213	13.43
YIEKGSPLNSPL	Protein phosphatase 1 regulatory subunit 29 OS=Mus musculus OX=10090 GN=Elfn2 PE=1 SV=1	Elfn2	4981395	12	6.69735	212	13.367
VRLLLPGELA	Histone H2B type 1-B OS=Mus musculus OX=10090 GN=H2bc3 PE=1 SV=3;Histone H2B type 1-F/J/L OS=Mus musculus OX=10090 GN=H2bc7 PE=1 SV=2	H2bc3	4958754	10	6.69537	211	13.3039
TSPTFFPK	Lysosomal alpha-glucosidase OS=Mus musculus OX=10090 GN=Gaa PE=1 SV=2	Gaa	4951207	8	6.69471	210	13.2409
GSVPEHPSPSPL	Heterogeneous nuclear ribonucleoproteins C1/C2 OS=Mus musculus OX=10090 GN=Hnrnpc PE=1 SV=1	Hnrnpc	4942672	12	6.69396	209	13.1778
IERPTYTNLNR	Tubulin alpha-8 chain OS=Mus musculus OX=10090 GN=Tuba8 PE=1 SV=1;Tubulin alpha-1A chain OS=Mus musculus OX=10090 GN=Tuba1a PE=1 SV=1;Tubulin alpha-1C chain OS=Mus musculus OX=10090 GN=Tuba1c PE=1 SV=1	Tuba8	4.9279e+06	11	6.69266	208	13.1148
GYDDLQMLQ	Ubiquitin-associated protein 2-like OS=Mus musculus OX=10090 GN=Ubap2l PE=1 SV=1	Ubap2l	4.90999e+06	9	6.69108	207	13.0517
KNVVAFKSGG	Mucin-2 (Fragments) OS=Mus musculus OX=10090 GN=Muc2 PE=1 SV=2	Muc2	4.90981e+06	10	6.69106	206	12.9887
FLGASLKDEVLK	40S ribosomal protein S2 OS=Mus musculus OX=10090 GN=Rps2 PE=1 SV=3	Rps2	4.9085e+06	12	6.69095	205	12.9256
STQGYGASSL	Homeobox protein OTX2 OS=Mus musculus OX=10090 GN=Otx2 PE=1 SV=1	Otx2	4906846	10	6.6908	204	12.8625
VMLENYSHL	Zinc finger protein 30 OS=Mus musculus OX=10090 GN=Zfp30 PE=1 SV=2	Zfp30	4868935	9	6.68743	203	12.7995
ELTQQVFDAK	Tubulin beta-5 chain OS=Mus musculus OX=10090 GN=Tubb5 PE=1 SV=1	Tubb5	4.86637e+06	10	6.6872	202	12.7364
GTDDDRPSW	Eukaryotic translation initiation factor 3 subunit A OS=Mus musculus OX=10090 GN=Eif3a PE=1 SV=5	Eif3a	4861838	9	6.6868	201	12.6734
GFQNAILVR	Albumin OS=Mus musculus OX=10090 GN=Alb PE=1 SV=3	Alb	4858600	9	6.68651	200	12.6103
KLTTPTYGDLNH	Tubulin beta-5 chain OS=Mus musculus OX=10090 GN=Tubb5 PE=1 SV=1;Tubulin beta-4B chain OS=Mus musculus OX=10090 GN=Tubb4b PE=1 SV=1;Tubulin beta-6 chain OS=Mus musculus OX=10090 GN=Tubb6 PE=1 SV=1	Tubb5	4849376	12	6.68569	199	12.5473
VDLEPTVIDEVR	Tubulin alpha-1A chain OS=Mus musculus OX=10090 GN=Tuba1a PE=1 SV=1;Tubulin alpha-1C chain OS=Mus musculus OX=10090 GN=Tuba1c PE=1 SV=1	Tuba1a	4.83393e+06	12	6.6843	198	12.4842
YQSKYEEL	Keratin, type II cytoskeletal 1 OS=Mus musculus OX=10090 GN=Krt1 PE=1 SV=4	Krt1	4.83191e+06	8	6.68412	197	12.4212
VIGHVDSGK	Elongation factor 1-alpha 1 OS=Mus musculus OX=10090 GN=Eef1a1 PE=1 SV=3	Eef1a1	4815429	9	6.68263	196	12.3581
EIVDAANAVIS	Tripeptidyl-peptidase 2 OS=Mus musculus OX=10090 GN=Tpp2 PE=1 SV=3	Tpp2	4.80104e+06	11	6.68133	195	12.2951
TPGNRIVYLY	60S ribosomal protein L34 OS=Mus musculus OX=10090 GN=Rpl34 PE=1 SV=2	Rpl34	4789772	10	6.68031	194	12.232
VANPNSAIF	Eukaryotic translation initiation factor 4H OS=Mus musculus OX=10090 GN=Eif4h PE=1 SV=3	Eif4h	4.78653e+06	9	6.68002	193	12.169
PLAQLADPWQK	Ribosomal protein S6 kinase alpha-3 OS=Mus musculus OX=10090 GN=Rps6ka3 PE=1 SV=2	Rps6ka3	4.77815e+06	11	6.67926	192	12.1059
ENKEPLHIVHPQ	E3 ubiquitin-protein ligase TRIM69 OS=Mus musculus OX=10090 GN=Trim69 PE=1 SV=1	Trim69	4.75865e+06	12	6.67748	191	12.0429
RVFQNEVLGTL	Translation initiation factor eIF-2B subunit epsilon OS=Mus musculus OX=10090 GN=Eif2b5 PE=1 SV=1	Eif2b5	4757479	11	6.67738	190	11.9798
TSIKNQTQL	Pseudouridylate synthase 7 homolog OS=Mus musculus OX=10090 GN=Pus7 PE=2 SV=2	Pus7	4747932	9	6.6765	189	11.9168
RAPSYRTL	DENN domain-containing protein 2B OS=Mus musculus OX=10090 GN=Dennd2b PE=1 SV=1	Dennd2b	4.74682e+06	8	6.6764	188	11.8537
FTEVLKTNGLLV	60S ribosomal protein L13a OS=Mus musculus OX=10090 GN=Rpl13a PE=1 SV=4	Rpl13a	4746386	12	6.67636	187	11.7907
RQMVSLEDDVA	Low-density lipoprotein receptor OS=Mus musculus OX=10090 GN=Ldlr PE=1 SV=2	Ldlr	4729849	11	6.67485	186	11.7276
KAWNDIKKVY	60S ribosomal protein L4 OS=Mus musculus OX=10090 GN=Rpl4 PE=1 SV=3	Rpl4	4.72415e+06	10	6.67432	185	11.6646
NSFRYNGL	60S ribosomal protein L28 OS=Mus musculus OX=10090 GN=Rpl28 PE=1 SV=2	Rpl28	4.70436e+06	8	6.6725	184	11.6015
STLRNIQGL	Proteasome maturation protein OS=Mus musculus OX=10090 GN=Pomp PE=1 SV=1	Pomp	4.69594e+06	9	6.67172	183	11.5385
NTHENLTYL	Plectin OS=Mus musculus OX=10090 GN=Plec PE=1 SV=3	Plec	4.69256e+06	9	6.67141	182	11.4754
YAPINANAI	Metastasis-associated protein MTA2 OS=Mus musculus OX=10090 GN=Mta2 PE=1 SV=1	Mta2	4690443	9	6.67121	181	11.4124
LLDLSPEEKSHF	5,6-dihydroxyindole-2-carboxylic acid oxidase OS=Mus musculus OX=10090 GN=Tyrp1 PE=1 SV=1	Tyrp1	4689705	12	6.67115	180	11.3493
VLDTNDRFL	Monofunctional C1-tetrahydrofolate synthase, mitochondrial OS=Mus musculus OX=10090 GN=Mthfd1l PE=1 SV=2;C-1-tetrahydrofolate synthase, cytoplasmic OS=Mus musculus OX=10090 GN=Mthfd1 PE=1 SV=4	Mthfd1l	4688285	9	6.67101	179	11.2863
INVPNAEVL	Probable ubiquitin carboxyl-terminal hydrolase FAF-X OS=Mus musculus OX=10090 GN=Usp9x PE=1 SV=2	Usp9x	4685198	9	6.67073	178	11.2232
AVLVEGGYD	DAZ-associated protein 2 OS=Mus musculus OX=10090 GN=Dazap2 PE=1 SV=1	Dazap2	4684164	9	6.67063	177	11.1602
SQIGVILR	40S ribosomal protein S13 OS=Mus musculus OX=10090 GN=Rps13 PE=1 SV=2	Rps13	4.67898e+06	8	6.67015	176	11.0971
EKEDSWLNP	NADPH oxidase 1 OS=Mus musculus OX=10090 GN=Nox1 PE=1 SV=2	Nox1	4.67547e+06	9	6.66982	175	11.034
AIEGTYIDKK	40S ribosomal protein S11 OS=Mus musculus OX=10090 GN=Rps11 PE=1 SV=3	Rps11	4663009	10	6.66867	174	10.971
YGISNEKPEV	RNA polymerase II-associated factor 1 homolog OS=Mus musculus OX=10090 GN=Paf1 PE=1 SV=1	Paf1	4.65775e+06	10	6.66818	173	10.9079
YVTIIDAPGHR	Elongation factor 1-alpha 1 OS=Mus musculus OX=10090 GN=Eef1a1 PE=1 SV=3	Eef1a1	4.64571e+06	11	6.66705	172	10.8449
GIVPDIAVGTK	Polypyrimidine tract-binding protein 1 OS=Mus musculus OX=10090 GN=Ptbp1 PE=1 SV=2	Ptbp1	4645395	11	6.66702	171	10.7818
IYEALELR	Alpha-enolase OS=Mus musculus OX=10090 GN=Eno1 PE=1 SV=3;Beta-enolase OS=Mus musculus OX=10090 GN=Eno3 PE=1 SV=3	Eno1	4.63354e+06	8	6.66591	170	10.7188
YMPRNISIYAE	Oocyte-secreted protein 3 OS=Mus musculus OX=10090 GN=Oosp3 PE=2 SV=1	Oosp3	4.62928e+06	11	6.66551	169	10.6557
GAIRNGGLYV	Uncharacterized aarF domain-containing protein kinase 5 OS=Mus musculus OX=10090 GN=Adck5 PE=2 SV=2	Adck5	4615458	10	6.66421	168	10.5927
SLIRETTTTY	Lamina-associated polypeptide 2, isoforms alpha/zeta OS=Mus musculus OX=10090 GN=Tmpo PE=1 SV=4	Tmpo	4595762	10	6.66236	167	10.5296
SFADDFVR	Serpin H1 OS=Mus musculus OX=10090 GN=Serpinh1 PE=1 SV=3	Serpinh1	4593893	8	6.66218	166	10.4666
ELTQQVFDAKNM	Tubulin beta-5 chain OS=Mus musculus OX=10090 GN=Tubb5 PE=1 SV=1	Tubb5	4.59257e+06	12	6.66206	165	10.4035
RIHAREIFDSR	Alpha-enolase OS=Mus musculus OX=10090 GN=Eno1 PE=1 SV=3	Eno1	4579063	11	6.66078	164	10.3405
EPQEVLHIGSAH	PDZ and LIM domain protein 1 OS=Mus musculus OX=10090 GN=Pdlim1 PE=1 SV=4	Pdlim1	4.56909e+06	12	6.65983	163	10.2774
AAVKFHNL	Glycerol-3-phosphate dehydrogenase, mitochondrial OS=Mus musculus OX=10090 GN=Gpd2 PE=1 SV=2	Gpd2	4.56875e+06	8	6.6598	162	10.2144
KLLYDLADQLH	Electron transfer flavoprotein subunit alpha, mitochondrial OS=Mus musculus OX=10090 GN=Etfa PE=1 SV=2	Etfa	4564606	11	6.6594	161	10.1513
VKVANVSLLA	40S ribosomal protein S23 OS=Mus musculus OX=10090 GN=Rps23 PE=1 SV=3	Rps23	4561011	10	6.65906	160	10.0883
IRQKFETP	2-oxoglutarate dehydrogenase, mitochondrial OS=Mus musculus OX=10090 GN=Ogdh PE=1 SV=3	Ogdh	4551983	8	6.6582	159	10.0252
KLELAQYREVAA	ATP synthase subunit alpha, mitochondrial OS=Mus musculus OX=10090 GN=Atp5f1a PE=1 SV=1	Atp5f1a	4525138	12	6.65563	158	9.96217
SVTTEFEKRAQ	GPALPP motifs-containing protein 1 OS=Mus musculus OX=10090 GN=Gpalpp1 PE=1 SV=2	Gpalpp1	4520158	11	6.65515	157	9.89912
AVRLKDEDLRDS	Nucleolar protein 7 OS=Mus musculus OX=10090 GN=Nol7 PE=1 SV=1	Nol7	4517819	12	6.65493	156	9.83607
FIMLLFLGL	Sodium- and chloride-dependent betaine transporter OS=Mus musculus OX=10090 GN=Slc6a12 PE=2 SV=1	Slc6a12	4508440	9	6.65403	155	9.77301
TSVVFNKL	DNA-directed RNA polymerase I subunit RPA12 OS=Mus musculus OX=10090 GN=Polr1h PE=1 SV=1	Polr1h	4507881	8	6.65397	154	9.70996
SIHSVDLDLL	Protein AF1q OS=Mus musculus OX=10090 GN=Mllt11 PE=1 SV=1	Mllt11	4503806	10	6.65358	153	9.64691
SQLSEEKW	Protein LYRIC OS=Mus musculus OX=10090 GN=Mtdh PE=1 SV=1	Mtdh	4497224	8	6.65294	152	9.58386
NIRNIGKTLVT	40S ribosomal protein S3a OS=Mus musculus OX=10090 GN=Rps3a PE=1 SV=3	Rps3a	4.49622e+06	11	6.65285	151	9.52081
RFVNVVPTFGKK	40S ribosomal protein S30 OS=Mus musculus OX=10090 GN=Fau PE=1 SV=1	Fau	4486374	12	6.6519	150	9.45776
VLDTNDRF	Monofunctional C1-tetrahydrofolate synthase, mitochondrial OS=Mus musculus OX=10090 GN=Mthfd1l PE=1 SV=2;C-1-tetrahydrofolate synthase, cytoplasmic OS=Mus musculus OX=10090 GN=Mthfd1 PE=1 SV=4	Mthfd1l	4.47297e+06	8	6.6506	149	9.3947
RAIAFQHL	Myb-binding protein 1A OS=Mus musculus OX=10090 GN=Mybbp1a PE=1 SV=2	Mybbp1a	4451648	8	6.64852	148	9.33165
DSRPGGYGY	RNA-binding protein 3 OS=Mus musculus OX=10090 GN=Rbm3 PE=1 SV=1	Rbm3	4.43318e+06	9	6.64672	147	9.2686
AADGKGVVVVM	60S ribosomal protein L28 OS=Mus musculus OX=10090 GN=Rpl28 PE=1 SV=2	Rpl28	4428360	11	6.64624	146	9.20555
FREGEGLGKY	Cap-specific mRNA (nucleoside-2'-O-)-methyltransferase 1 OS=Mus musculus OX=10090 GN=Cmtr1 PE=1 SV=1	Cmtr1	4425997	10	6.64601	145	9.1425
REICMYSSL	Zinc finger SWIM domain-containing protein 4 OS=Mus musculus OX=10090 GN=Zswim4 PE=2 SV=2	Zswim4	4.41532e+06	9	6.64496	144	9.07945
VTIIDAPGHRDF	Elongation factor 1-alpha 1 OS=Mus musculus OX=10090 GN=Eef1a1 PE=1 SV=3	Eef1a1	4412921	12	6.64473	143	9.01639
VNYRHLALL	DNA-directed RNA polymerase II subunit RPB1 OS=Mus musculus OX=10090 GN=Polr2a PE=1 SV=3	Polr2a	4373247	9	6.6408	142	8.95334
VGVTYRTL	Protein MMS22-like OS=Mus musculus OX=10090 GN=Mms22l PE=1 SV=1	Mms22l	4369730	8	6.64045	141	8.89029
YYPTEDVPRKL	60S ribosomal protein L6 OS=Mus musculus OX=10090 GN=Rpl6 PE=1 SV=3	Rpl6	4359660	11	6.63945	140	8.82724
RSVSDNDIRKYE	Transitional endoplasmic reticulum ATPase OS=Mus musculus OX=10090 GN=Vcp PE=1 SV=4	Vcp	4.35723e+06	12	6.63921	139	8.76419
YLGRLAHEVGW	60S ribosomal protein L13a OS=Mus musculus OX=10090 GN=Rpl13a PE=1 SV=4	Rpl13a	4.35324e+06	11	6.63881	138	8.70113
KVKLAVLKYYK	Ubiquitin-40S ribosomal protein S27a OS=Mus musculus OX=10090 GN=Rps27a PE=1 SV=2	Rps27a	4340752	11	6.63756	137	8.63808
AWGEGQRLGG	Derlin-2 OS=Mus musculus OX=10090 GN=Derl2 PE=1 SV=2	Derl2	4320238	10	6.63551	136	8.57503
SFTHIISNM	28S ribosomal protein S31, mitochondrial OS=Mus musculus OX=10090 GN=Mrps31 PE=1 SV=1	Mrps31	4312257	9	6.6347	135	8.51198
LDIERPTYTNLN	Tubulin alpha-8 chain OS=Mus musculus OX=10090 GN=Tuba8 PE=1 SV=1;Tubulin alpha-1A chain OS=Mus musculus OX=10090 GN=Tuba1a PE=1 SV=1;Tubulin alpha-1C chain OS=Mus musculus OX=10090 GN=Tuba1c PE=1 SV=1	Tuba8	4.30065e+06	12	6.63353	134	8.44893
YQYTNSEVL	Exportin-T OS=Mus musculus OX=10090 GN=Xpot PE=1 SV=3	Xpot	4.29114e+06	9	6.63257	133	8.38588
NTVEGYSAPTGK	5,6-dihydroxyindole-2-carboxylic acid oxidase OS=Mus musculus OX=10090 GN=Tyrp1 PE=1 SV=1	Tyrp1	4283937	12	6.63184	132	8.32282
PAYFQRPENALK	Eukaryotic translation initiation factor 3 subunit A OS=Mus musculus OX=10090 GN=Eif3a PE=1 SV=5	Eif3a	4.26575e+06	12	6.63	131	8.25977
DTGISSKAMGIM	Histone H2B type 1-B OS=Mus musculus OX=10090 GN=H2bc3 PE=1 SV=3;Histone H2B type 1-F/J/L OS=Mus musculus OX=10090 GN=H2bc7 PE=1 SV=2	H2bc3	4242272	12	6.6276	130	8.19672
QVIILNHPG	Elongation factor 1-alpha 1 OS=Mus musculus OX=10090 GN=Eef1a1 PE=1 SV=3	Eef1a1	4239427	9	6.62731	129	8.13367
IGPENSGKV	Sortilin OS=Mus musculus OX=10090 GN=Sort1 PE=1 SV=1	Sort1	4238578	9	6.62722	128	8.07062
REAMRIGAEVY	Alpha-enolase OS=Mus musculus OX=10090 GN=Eno1 PE=1 SV=3	Eno1	4.21515e+06	11	6.62481	127	8.00757
VLSDVHAELDR	Cytoplasmic dynein 1 light intermediate chain 1 OS=Mus musculus OX=10090 GN=Dync1li1 PE=1 SV=1	Dync1li1	4.21363e+06	11	6.62466	126	7.94451
FAPVVAPKPK	Zyxin OS=Mus musculus OX=10090 GN=Zyx PE=1 SV=2	Zyx	4.17484e+06	10	6.62064	125	7.88146
VRYSLDPENPT	60S ribosomal protein L17 OS=Mus musculus OX=10090 GN=Rpl17 PE=1 SV=3	Rpl17	4.16767e+06	11	6.61989	124	7.81841
KTVDGPSGKLWR	Glyceraldehyde-3-phosphate dehydrogenase OS=Mus musculus OX=10090 GN=Gapdh PE=1 SV=2	Gapdh	4.15909e+06	12	6.619	123	7.75536
QPVPKQIERY	[Pyruvate dehydrogenase (acetyl-transferring)] kinase isozyme 3, mitochondrial OS=Mus musculus OX=10090 GN=Pdk3 PE=1 SV=1	Pdk3	4150731	10	6.61812	122	7.69231
YFEGIKQTF	Activator of 90 kDa heat shock protein ATPase homolog 1 OS=Mus musculus OX=10090 GN=Ahsa1 PE=1 SV=2	Ahsa1	4.14317e+06	9	6.61733	121	7.62926
LEPSELKER	Serine/arginine repetitive matrix protein 2 OS=Mus musculus OX=10090 GN=Srrm2 PE=1 SV=3	Srrm2	4.12511e+06	9	6.61544	120	7.5662
PGHLQEGF	Plasminogen activator inhibitor 1 RNA-binding protein OS=Mus musculus OX=10090 GN=Serbp1 PE=1 SV=2	Serbp1	4.09485e+06	8	6.61224	119	7.50315
FIELQEKLH	Phenylalanine--tRNA ligase beta subunit OS=Mus musculus OX=10090 GN=Farsb PE=1 SV=2	Farsb	4.09333e+06	9	6.61208	118	7.4401
TDEESRVF	Bcl-2-associated transcription factor 1 OS=Mus musculus OX=10090 GN=Bclaf1 PE=1 SV=2	Bclaf1	4.08409e+06	8	6.6111	117	7.37705
FGLGAEQRPPA	Activity-dependent neuroprotector homeobox protein OS=Mus musculus OX=10090 GN=Adnp PE=1 SV=2	Adnp	4.07826e+06	11	6.61047	116	7.314
RKPSLVASKLAG	cAMP-regulated phosphoprotein 19 OS=Mus musculus OX=10090 GN=Arpp19 PE=1 SV=2	Arpp19	4.07636e+06	12	6.61027	115	7.25095
GANPVEIR	60 kDa heat shock protein, mitochondrial OS=Mus musculus OX=10090 GN=Hspd1 PE=1 SV=1	Hspd1	4070048	8	6.6096	114	7.18789
YVTTSTRTY	Vimentin OS=Mus musculus OX=10090 GN=Vim PE=1 SV=3	Vim	4.06196e+06	9	6.60874	113	7.12484
SSPGPFDYVGA	Nuclear factor of activated T-cells, cytoplasmic 4 OS=Mus musculus OX=10090 GN=Nfatc4 PE=1 SV=2	Nfatc4	4.04293e+06	11	6.6067	112	7.06179
KLDELYGTW	60S ribosomal protein L4 OS=Mus musculus OX=10090 GN=Rpl4 PE=1 SV=3	Rpl4	4.03877e+06	9	6.60625	111	6.99874
TLIENGEKI	Nuclear pore glycoprotein p62 OS=Mus musculus OX=10090 GN=Nup62 PE=1 SV=2	Nup62	4.03783e+06	9	6.60615	110	6.93569
SAPTLEDHF	Microfibrillar-associated protein 1A OS=Mus musculus OX=10090 GN=Mfap1a PE=1 SV=1	Mfap1a	4.03287e+06	9	6.60561	109	6.87264
GAAKAVGKVIP	Glyceraldehyde-3-phosphate dehydrogenase OS=Mus musculus OX=10090 GN=Gapdh PE=1 SV=2	Gapdh	4012075	11	6.60337	108	6.80958
RKFDSESLEVL	Probable ATP-dependent RNA helicase DDX52 OS=Mus musculus OX=10090 GN=Ddx52 PE=2 SV=2	Ddx52	4007869	11	6.60291	107	6.74653
KIDELSLY	MICOS complex subunit Mic26 OS=Mus musculus OX=10090 GN=Apoo PE=1 SV=2	Apoo	3.98951e+06	8	6.60092	106	6.68348
KGVDPKFLRNM	60S ribosomal protein L29 OS=Mus musculus OX=10090 GN=Rpl29 PE=1 SV=2	Rpl29	3.98483e+06	11	6.60041	105	6.62043
LWDLTTGTTTR	Receptor of activated protein C kinase 1 OS=Mus musculus OX=10090 GN=Rack1 PE=1 SV=3	Rack1	3979848	11	6.59987	104	6.55738
GLDDDRGPW	Eukaryotic translation initiation factor 3 subunit A OS=Mus musculus OX=10090 GN=Eif3a PE=1 SV=5	Eif3a	3.97902e+06	9	6.59978	103	6.49433
RSITNDSAVL	Hepatocyte growth factor-regulated tyrosine kinase substrate OS=Mus musculus OX=10090 GN=Hgs PE=1 SV=2	Hgs	3.96432e+06	10	6.59817	102	6.43127
KGRLLKDI	Mitogen-activated protein kinase 15 OS=Mus musculus OX=10090 GN=Mapk15 PE=1 SV=1	Mapk15	3.9549e+06	8	6.59714	101	6.36822
VHQLVENTDETY	Tubulin beta-5 chain OS=Mus musculus OX=10090 GN=Tubb5 PE=1 SV=1;Tubulin beta-4B chain OS=Mus musculus OX=10090 GN=Tubb4b PE=1 SV=1;Tubulin beta-6 chain OS=Mus musculus OX=10090 GN=Tubb6 PE=1 SV=1	Tubb5	3.94546e+06	12	6.5961	100	6.30517
AVLIMYPTS	Asc-type amino acid transporter 1 OS=Mus musculus OX=10090 GN=Slc7a10 PE=1 SV=1	Slc7a10	3939248	9	6.59541	99	6.24212
AIKQEVLTPDNM	Protein C-ets-1 OS=Mus musculus OX=10090 GN=Ets1 PE=1 SV=2	Ets1	3924971	12	6.59384	98	6.17907
IGPTYYQRL	DNA-directed RNA polymerase II subunit RPB2 OS=Mus musculus OX=10090 GN=Polr2b PE=1 SV=2	Polr2b	3.91991e+06	9	6.59328	97	6.11602
HTIIEIAEHK	Rho GTPase-activating protein 30 OS=Mus musculus OX=10090 GN=Arhgap30 PE=1 SV=3	Arhgap30	3.89965e+06	10	6.59103	96	6.05296
FNVINGGSHAG	Alpha-enolase OS=Mus musculus OX=10090 GN=Eno1 PE=1 SV=3;Beta-enolase OS=Mus musculus OX=10090 GN=Eno3 PE=1 SV=3	Eno1	3.89873e+06	11	6.59092	95	5.98991
STPFSVADILR	Homeobox protein Nkx-2.6 OS=Mus musculus OX=10090 GN=Nkx2-6 PE=2 SV=2	Nkx2-6	3892412	11	6.59022	94	5.92686
LLQDKPRTL	Transmembrane glycoprotein NMB OS=Mus musculus OX=10090 GN=Gpnmb PE=1 SV=2	Gpnmb	3.84728e+06	9	6.58515	93	5.86381
LGEEVPVII	Ganglioside-induced differentiation-associated protein 1-like 1 OS=Mus musculus OX=10090 GN=Gdap1l1 PE=1 SV=1	Gdap1l1	3.83663e+06	9	6.58395	92	5.80076
AGELTEDEVER	40S ribosomal protein S18 OS=Mus musculus OX=10090 GN=Rps18 PE=1 SV=3	Rps18	3.82794e+06	11	6.58296	91	5.7377
YLRELTVGSQ	Nuclear pore complex protein Nup98-Nup96 OS=Mus musculus OX=10090 GN=Nup98 PE=1 SV=2	Nup98	3.81172e+06	10	6.58112	90	5.67465
DKDDYHSLLY	Tyrosinase OS=Mus musculus OX=10090 GN=Tyr PE=1 SV=3	Tyr	3793430	10	6.57903	89	5.6116
TYLEKAIKIHN	Ubiquitin carboxyl-terminal hydrolase 7 OS=Mus musculus OX=10090 GN=Usp7 PE=1 SV=1	Usp7	3.78874e+06	11	6.5785	88	5.54855
RSGEGEVSGLLR	Transcription intermediary factor 1-beta OS=Mus musculus OX=10090 GN=Trim28 PE=1 SV=3	Trim28	3.78691e+06	12	6.57829	87	5.4855
YDNEYGYSN	Glyceraldehyde-3-phosphate dehydrogenase OS=Mus musculus OX=10090 GN=Gapdh PE=1 SV=2	Gapdh	3.78508e+06	9	6.57808	86	5.42245
ALSGSWDGTLR	Receptor of activated protein C kinase 1 OS=Mus musculus OX=10090 GN=Rack1 PE=1 SV=3	Rack1	3.77767e+06	11	6.57722	85	5.35939
RSIDQFANL	U6 snRNA-associated Sm-like protein LSm1 OS=Mus musculus OX=10090 GN=Lsm1 PE=1 SV=1	Lsm1	3.77754e+06	9	6.57721	84	5.29634
SHEGPAFL	5,6-dihydroxyindole-2-carboxylic acid oxidase OS=Mus musculus OX=10090 GN=Tyrp1 PE=1 SV=1	Tyrp1	3775955	8	6.57703	83	5.23329
SFNKEEVLKNIK	T-cell-specific guanine nucleotide triphosphate-binding protein 1 OS=Mus musculus OX=10090 GN=Tgtp1 PE=1 SV=1	Tgtp1	3.77446e+06	12	6.57686	82	5.17024
GVIKVFNDMKVR	Cofilin-1 OS=Mus musculus OX=10090 GN=Cfl1 PE=1 SV=3	Cfl1	3759990	12	6.57519	81	5.10719
ALEKIDLK	60S ribosomal protein L3 OS=Mus musculus OX=10090 GN=Rpl3 PE=1 SV=3	Rpl3	3.75635e+06	8	6.57477	80	5.04414
VSINEDGTL	F-box-like/WD repeat-containing protein TBL1XR1 OS=Mus musculus OX=10090 GN=Tbl1xr1 PE=1 SV=1	Tbl1xr1	3.73797e+06	9	6.57264	79	4.98108
EPSRYLSI	Ubiquitin carboxyl-terminal hydrolase 26 OS=Mus musculus OX=10090 GN=Usp26 PE=1 SV=2	Usp26	3732227	8	6.57197	78	4.91803
GGYGYGYGR	RNA-binding protein 3 OS=Mus musculus OX=10090 GN=Rbm3 PE=1 SV=1	Rbm3	3713157	9	6.56974	77	4.85498
ALLELEMNSDLK	40S ribosomal protein S7 OS=Mus musculus OX=10090 GN=Rps7 PE=2 SV=1	Rps7	3.68084e+06	12	6.56595	76	4.79193
RGIKKPFTEVIR	Alanine aminotransferase 2 OS=Mus musculus OX=10090 GN=Gpt2 PE=1 SV=1	Gpt2	3678142	12	6.56563	75	4.72888
YAIKNIHGV	Dynamin-2 OS=Mus musculus OX=10090 GN=Dnm2 PE=1 SV=2	Dnm2	3.67812e+06	9	6.56563	74	4.66583
WEAADLGNEER	Small acidic protein OS=Mus musculus OX=10090 GN=Smap PE=1 SV=1	Smap	3676287	11	6.56541	73	4.60277
VGITYQHI	Eukaryotic translation initiation factor 3 subunit K OS=Mus musculus OX=10090 GN=Eif3k PE=1 SV=1	Eif3k	3.65437e+06	8	6.56281	72	4.53972
SFLDLVRN	Neutral amino acid transporter B(0) OS=Mus musculus OX=10090 GN=Slc1a5 PE=1 SV=2	Slc1a5	3.63789e+06	8	6.56085	71	4.47667
KSYLMNRL	Guanylate-binding protein 4 OS=Mus musculus OX=10090 GN=Gbp4 PE=1 SV=1	Gbp4	3632345	8	6.56019	70	4.41362
RSLGNDVKSYL	Protein Njmu-R1 OS=Mus musculus OX=10090 PE=1 SV=2	?	3.62813e+06	11	6.55968	69	4.35057
VKVGVNGFGRIG	Glyceraldehyde-3-phosphate dehydrogenase OS=Mus musculus OX=10090 GN=Gapdh PE=1 SV=2	Gapdh	3610707	12	6.55759	68	4.28752
LQHSPTILQ	Kinesin-like protein KIF20B OS=Mus musculus OX=10090 GN=Kif20b PE=1 SV=3	Kif20b	3.60513e+06	9	6.55692	67	4.22446
PSSQEVMP	Receptor-type tyrosine-protein phosphatase F OS=Mus musculus OX=10090 GN=Ptprf PE=1 SV=1	Ptprf	3.60343e+06	8	6.55672	66	4.16141
SESSREGAITF	Signal transducer and activator of transcription 1 OS=Mus musculus OX=10090 GN=Stat1 PE=1 SV=1	Stat1	3.59791e+06	11	6.55605	65	4.09836
QTGMLISSMA	Protein FAN OS=Mus musculus OX=10090 GN=Nsmaf PE=1 SV=2	Nsmaf	3.5922e+06	10	6.55536	64	4.03531
FADLSEAANR	Vimentin OS=Mus musculus OX=10090 GN=Vim PE=1 SV=3	Vim	3583683	10	6.55433	63	3.97226
YQHGGVTGL	Regulator of nonsense transcripts 1 OS=Mus musculus OX=10090 GN=Upf1 PE=1 SV=2	Upf1	3.56977e+06	9	6.55264	62	3.90921
IGQGYLIKDGK	60S ribosomal protein L3 OS=Mus musculus OX=10090 GN=Rpl3 PE=1 SV=3	Rpl3	3.55582e+06	11	6.55094	61	3.84615
SVVADTPELQR	LIM and SH3 domain protein 1 OS=Mus musculus OX=10090 GN=Lasp1 PE=1 SV=1	Lasp1	3.54271e+06	11	6.54934	60	3.7831
SITESTKPQL	Succinate dehydrogenase assembly factor 3, mitochondrial OS=Mus musculus OX=10090 GN=Sdhaf3 PE=2 SV=1	Sdhaf3	3533454	10	6.5482	59	3.72005
VNRQFMAETQF	Caprin-1 OS=Mus musculus OX=10090 GN=Caprin1 PE=1 SV=2	Caprin1	3520783	11	6.54664	58	3.657
VDLEFLAK	Transitional endoplasmic reticulum ATPase OS=Mus musculus OX=10090 GN=Vcp PE=1 SV=4	Vcp	3.51244e+06	8	6.54561	57	3.59395
SAVTNSGVHL	GTP-binding protein 8 OS=Mus musculus OX=10090 GN=Gtpbp8 PE=2 SV=1	Gtpbp8	3.50221e+06	10	6.54434	56	3.5309
KAASAIYL	UPF0193 protein EVG1 homolog OS=Mus musculus OX=10090 PE=2 SV=1	?	3.50116e+06	8	6.54421	55	3.46784
LAGESESNLR	Transitional endoplasmic reticulum ATPase OS=Mus musculus OX=10090 GN=Vcp PE=1 SV=4	Vcp	3499177	10	6.54397	54	3.40479
GVHVNQELL	Vacuolar protein sorting-associated protein 8 homolog OS=Mus musculus OX=10090 GN=Vps8 PE=1 SV=1	Vps8	3.48591e+06	9	6.54232	53	3.34174
DGYGSHGPLLP	Heterogeneous nuclear ribonucleoprotein L-like OS=Mus musculus OX=10090 GN=Hnrnpll PE=1 SV=3	Hnrnpll	3481740	11	6.5418	52	3.27869
IEVDDERKLRTF	40S ribosomal protein S6 OS=Mus musculus OX=10090 GN=Rps6 PE=1 SV=1	Rps6	3.47305e+06	12	6.54071	51	3.21564
TTPTYGDLNH	Tubulin beta-5 chain OS=Mus musculus OX=10090 GN=Tubb5 PE=1 SV=1;Tubulin beta-4B chain OS=Mus musculus OX=10090 GN=Tubb4b PE=1 SV=1;Tubulin beta-6 chain OS=Mus musculus OX=10090 GN=Tubb6 PE=1 SV=1	Tubb5	3.46695e+06	10	6.53995	50	3.15259
KSDADLVVFL	2'-5'-oligoadenylate synthase 1A OS=Mus musculus OX=10090 GN=Oas1a PE=1 SV=2	Oas1a	3.46496e+06	10	6.5397	49	3.08953
IKIIAPPERK	Actin, cytoplasmic 1 OS=Mus musculus OX=10090 GN=Actb PE=1 SV=1;Actin, alpha cardiac muscle 1 OS=Mus musculus OX=10090 GN=Actc1 PE=1 SV=1	Actb	3.44453e+06	10	6.53713	48	3.02648
AMYVHAYTL	Proteasome subunit alpha type-3 OS=Mus musculus OX=10090 GN=Psma3 PE=1 SV=3	Psma3	3.43729e+06	9	6.53622	47	2.96343
GLAVKDLK	60S ribosomal protein L38 OS=Mus musculus OX=10090 GN=Rpl38 PE=1 SV=3	Rpl38	3.43043e+06	8	6.53535	46	2.90038
SGYSFTHI	Actin-related protein 6 OS=Mus musculus OX=10090 GN=Actr6 PE=1 SV=2	Actr6	3422149	8	6.5343	45	2.83733
KPGDLGLV	Cilia- and flagella-associated protein 157 OS=Mus musculus OX=10090 GN=Cfap157 PE=1 SV=1	Cfap157	3.4207e+06	8	6.53411	44	2.77427
VLSIGDGIAR	ATP synthase subunit alpha, mitochondrial OS=Mus musculus OX=10090 GN=Atp5f1a PE=1 SV=1	Atp5f1a	3393435	10	6.53064	43	2.71122
ETGVLKPGMVVT	Elongation factor 1-alpha 1 OS=Mus musculus OX=10090 GN=Eef1a1 PE=1 SV=3	Eef1a1	3.37742e+06	12	6.52858	42	2.64817
MLDDIVSR	Far upstream element-binding protein 2 OS=Mus musculus OX=10090 GN=Khsrp PE=1 SV=2	Khsrp	3361427	8	6.52652	41	2.58512
AMQEAKQQFVEY	Reticulocalbin-2 OS=Mus musculus OX=10090 GN=Rcn2 PE=1 SV=1	Rcn2	3349152	12	6.52493	40	2.52207
RGTVVTGTLE	Elongation factor Tu, mitochondrial OS=Mus musculus OX=10090 GN=Tufm PE=1 SV=1	Tufm	3.33196e+06	10	6.5227	39	2.45902
RQAILGDHPSSF	Heterogeneous nuclear ribonucleoprotein L-like OS=Mus musculus OX=10090 GN=Hnrnpll PE=1 SV=3	Hnrnpll	3.32552e+06	12	6.52186	38	2.39596
TLDKPSAETF	Very-long-chain 3-oxoacyl-CoA reductase OS=Mus musculus OX=10090 GN=Hsd17b12 PE=1 SV=1	Hsd17b12	3.31921e+06	10	6.52104	37	2.33291
GASKLVPVGY	Elongation factor 1-delta OS=Mus musculus OX=10090 GN=Eef1d PE=1 SV=3	Eef1d	3.27203e+06	10	6.51482	36	2.26986
YQQDLDRELY	ATP synthase-coupling factor 6, mitochondrial OS=Mus musculus OX=10090 GN=Atp5pf PE=1 SV=1	Atp5pf	3.27052e+06	10	6.51462	35	2.20681
VTVLNVDHL	CASP8-associated protein 2 OS=Mus musculus OX=10090 GN=Casp8ap2 PE=1 SV=2	Casp8ap2	3.23152e+06	9	6.50941	34	2.14376
SAPRLPAAL	Next to BRCA1 gene 1 protein OS=Mus musculus OX=10090 GN=Nbr1 PE=1 SV=1	Nbr1	3.23126e+06	9	6.50937	33	2.08071
AFEQKTLTPEQW	BolA-like protein 2 OS=Mus musculus OX=10090 GN=Bola2 PE=1 SV=1	Bola2	3.22406e+06	12	6.5084	32	2.01765
NQYENAEKL	Amyloid protein-binding protein 2 OS=Mus musculus OX=10090 GN=Appbp2 PE=2 SV=1	Appbp2	3.21282e+06	9	6.50689	31	1.9546
GTYHGDSDLQLD	Tubulin beta-5 chain OS=Mus musculus OX=10090 GN=Tubb5 PE=1 SV=1	Tubb5	3.19887e+06	12	6.505	30	1.89155
SRSGEGEVSGLL	Transcription intermediary factor 1-beta OS=Mus musculus OX=10090 GN=Trim28 PE=1 SV=3	Trim28	3.16635e+06	12	6.50056	29	1.8285
NDGYGFGSDRF	Heterogeneous nuclear ribonucleoprotein H2 OS=Mus musculus OX=10090 GN=Hnrnph2 PE=1 SV=1;Heterogeneous nuclear ribonucleoprotein H OS=Mus musculus OX=10090 GN=Hnrnph1 PE=1 SV=3	Hnrnph2	3149787	11	6.49828	28	1.76545
ILIATDVASR	Probable ATP-dependent RNA helicase DDX17 OS=Mus musculus OX=10090 GN=Ddx17 PE=1 SV=1;Probable ATP-dependent RNA helicase DDX5 OS=Mus musculus OX=10090 GN=Ddx5 PE=1 SV=2	Ddx17	3.10797e+06	10	6.49248	27	1.7024
NDESPLGLR	Rho guanine nucleotide exchange factor 2 OS=Mus musculus OX=10090 GN=Arhgef2 PE=1 SV=4	Arhgef2	3088165	9	6.4897	26	1.63934
SQLVSMTLN	Polymeric immunoglobulin receptor OS=Mus musculus OX=10090 GN=Pigr PE=1 SV=1	Pigr	3.0641e+06	9	6.4863	25	1.57629
SEDIPLNLSR	Heat shock protein HSP 90-alpha OS=Mus musculus OX=10090 GN=Hsp90aa1 PE=1 SV=4;Heat shock protein 75 kDa, mitochondrial OS=Mus musculus OX=10090 GN=Trap1 PE=1 SV=1;Heat shock protein HSP 90-beta OS=Mus musculus OX=10090 GN=Hsp90ab1 PE=1 SV=3	Hsp90aa1	3.04225e+06	10	6.4832	24	1.51324
SLRIPEELEGVR	Phosphatidylinositol 4-kinase alpha OS=Mus musculus OX=10090 GN=Pi4ka PE=1 SV=2	Pi4ka	3041196	12	6.48304	23	1.45019
RISGLIYEETR	Histone H4 OS=Mus musculus OX=10090 GN=H4c1 PE=1 SV=2	H4c1	3031857	11	6.48171	22	1.38714
RQTVAVGVIK	Elongation factor 1-alpha 1 OS=Mus musculus OX=10090 GN=Eef1a1 PE=1 SV=3	Eef1a1	3.01697e+06	10	6.47957	21	1.32409
GFAGDDAPR	Actin, cytoplasmic 1 OS=Mus musculus OX=10090 GN=Actb PE=1 SV=1;Actin, alpha cardiac muscle 1 OS=Mus musculus OX=10090 GN=Actc1 PE=1 SV=1	Actb	2.91269e+06	9	6.46429	20	1.26103
PLENAPIGH	5,6-dihydroxyindole-2-carboxylic acid oxidase OS=Mus musculus OX=10090 GN=Tyrp1 PE=1 SV=1	Tyrp1	2902893	9	6.46283	19	1.19798
KVTLNGFLDT	Dystrobrevin alpha OS=Mus musculus OX=10090 GN=Dtna PE=1 SV=2	Dtna	2.89474e+06	10	6.46161	18	1.13493
LFRNIGLDD	Phosphoribosyl pyrophosphate synthase-associated protein 2 OS=Mus musculus OX=10090 GN=Prpsap2 PE=1 SV=1	Prpsap2	2894470	9	6.46157	17	1.07188
HLDRLVSA	Hepatocyte growth factor receptor OS=Mus musculus OX=10090 GN=Met PE=1 SV=1	Met	2.89238e+06	8	6.46125	16	1.00883
DLSLEEIQK	Stathmin OS=Mus musculus OX=10090 GN=Stmn1 PE=1 SV=2	Stmn1	2.889e+06	9	6.46075	15	0.945776
FKMGLTLEGTV	PTB domain-containing engulfment adapter protein 1 OS=Mus musculus OX=10090 GN=Gulp1 PE=1 SV=1	Gulp1	2.88856e+06	11	6.46068	14	0.882724
GKVNLVQL	Blood group Rh(D) polypeptide OS=Mus musculus OX=10090 GN=Rhd PE=1 SV=1	Rhd	2.8655e+06	8	6.4572	13	0.819672
HGDSDLQLER	Tubulin beta-4B chain OS=Mus musculus OX=10090 GN=Tubb4b PE=1 SV=1	Tubb4b	2.86078e+06	10	6.45648	12	0.75662
GAPLNIHKV	TBC1 domain family member 5 OS=Mus musculus OX=10090 GN=Tbc1d5 PE=1 SV=2	Tbc1d5	2820228	9	6.45028	11	0.693569
RSLENRVTF	von Willebrand factor A domain-containing protein 5A OS=Mus musculus OX=10090 GN=Vwa5a PE=1 SV=2	Vwa5a	2.73234e+06	9	6.43653	10	0.630517
GQIIGEGRSGF	28S ribosomal protein S5, mitochondrial OS=Mus musculus OX=10090 GN=Mrps5 PE=1 SV=1	Mrps5	2731684	11	6.43643	9	0.567465
WQGEEVPR	LIM domain and actin-binding protein 1 OS=Mus musculus OX=10090 GN=Lima1 PE=1 SV=3	Lima1	2.53275e+06	8	6.40359	8	0.504414
KEKDLMCIKLHG	Kelch-like protein 9 OS=Mus musculus OX=10090 GN=Klhl9 PE=2 SV=2	Klhl9	2.53076e+06	12	6.40325	7	0.441362
LVEKLTTY	Trifunctional enzyme subunit alpha, mitochondrial OS=Mus musculus OX=10090 GN=Hadha PE=1 SV=1	Hadha	2519591	8	6.40133	6	0.37831
GVRLLQDSVD	Vimentin OS=Mus musculus OX=10090 GN=Vim PE=1 SV=3	Vim	2.50664e+06	10	6.39909	5	0.315259
SLHFNENIAAVM	Guanine nucleotide-binding protein-like 3 OS=Mus musculus OX=10090 GN=Gnl3 PE=1 SV=2	Gnl3	2.50499e+06	12	6.39881	4	0.252207
DLQNDEVAFRKF	40S ribosomal protein S3a OS=Mus musculus OX=10090 GN=Rps3a PE=1 SV=3	Rps3a	2390996	12	6.37858	3	0.189155
DLDLKKPIYQR	S-adenosylmethionine synthase isoform type-2 OS=Mus musculus OX=10090 GN=Mat2a PE=1 SV=2	Mat2a	2.01248e+06	11	6.30373	2	0.126103
GSKFISSN	3'-5' exoribonuclease 1 OS=Mus musculus OX=10090 GN=Eri1 PE=1 SV=2	Eri1	1.54096e+06	8	6.18779	1	0.0630517

## Sheet: Sheet2
FQIVNPHLL	Ribonucleoside-diphosphate reductase large subunit OS=Mus musculus OX=10090 GN=Rrm1 PE=1 SV=2	Rrm1	3640745728	9	9.56119	1586	100		PPLLAARLVPP	RNA-binding protein 27 OS=Mus musculus OX=10090 GN=Rbm27 PE=1 SV=3	Rbm27	2484682364	11	9.39527	627	100
SIYRYYGL	SIY [mouse]	SIY	1858585856	8	9.26918	1585	99.9369		AFAVLLGLGLG	Tumor necrosis factor receptor superfamily member 4 OS=Mus musculus OX=10090 GN=Tnfrsf4 PE=1 SV=1	Tnfrsf4	971613972	11	8.98749	626	99.8405
SQVMNLHNL	L-dopachrome tautomerase OS=Mus musculus OX=10090 GN=Dct PE=1 SV=2	Dct	1806039168	9	9.25673	1584	99.8739		KALINADEL	Spectrin alpha chain, non-erythrocytic 1 OS=Mus musculus OX=10090 GN=Sptan1 PE=1 SV=4	Sptan1	590236096	9	8.77103	625	99.681
PPLLAARLVPP	RNA-binding protein 27 OS=Mus musculus OX=10090 GN=Rbm27 PE=1 SV=3	Rbm27	1106994077	11	9.04415	1583	99.8108		SQVMNLHNL	L-dopachrome tautomerase OS=Mus musculus OX=10090 GN=Dct PE=1 SV=2	Dct	576344128	9	8.76068	624	99.5215
RPGVYTNI	Testisin OS=Mus musculus OX=10090 GN=Prss21 PE=1 SV=2	Prss21	976860160	8	8.98983	1582	99.7478		RPGVYTNI	Testisin OS=Mus musculus OX=10090 GN=Prss21 PE=1 SV=2	Prss21	543579968	8	8.73526	623	99.362
RTYTYEKL	Catenin beta-1 OS=Mus musculus OX=10090 GN=Ctnnb1 PE=1 SV=1	Ctnnb1	849295136	8	8.92906	1581	99.6847		NSIRNLDTI	Ataxin-10 OS=Mus musculus OX=10090 GN=Atxn10 PE=1 SV=2	Atxn10	441789984	9	8.64522	622	99.2026
PRKIEEIKDF	60S ribosomal protein L38 OS=Mus musculus OX=10090 GN=Rpl38 PE=1 SV=3	Rpl38	725356636	10	8.86055	1580	99.6217		SIYRYYGL	SIY [mouse]	SIY	438353920	8	8.64182	621	99.0431
SLGSALRP	Vimentin OS=Mus musculus OX=10090 GN=Vim PE=1 SV=3	Vim	701897152	8	8.84627	1579	99.5586		RTYTYEKL	Catenin beta-1 OS=Mus musculus OX=10090 GN=Ctnnb1 PE=1 SV=1	Ctnnb1	428152744	8	8.6316	620	98.8836
AFAVLLGLGLG	Tumor necrosis factor receptor superfamily member 4 OS=Mus musculus OX=10090 GN=Tnfrsf4 PE=1 SV=1	Tnfrsf4	592593878	11	8.77276	1578	99.4956		ATLVFHNL	Signal transducer and activator of transcription 3 OS=Mus musculus OX=10090 GN=Stat3 PE=1 SV=2	Stat3	420225728	8	8.62348	619	98.7241
RSVTDPAMAPRT	Nascent polypeptide-associated complex subunit alpha, muscle-specific form OS=Mus musculus OX=10090 GN=Naca PE=1 SV=2	Naca	561238304	12	8.74915	1577	99.4325		LQQQLEQL	Max dimerization protein 3 OS=Mus musculus OX=10090 GN=Mxd3 PE=1 SV=1	Mxd3	332455712	8	8.52173	618	98.5646
NLSKEDDVRQY	40S ribosomal protein S6 OS=Mus musculus OX=10090 GN=Rps6 PE=1 SV=1	Rps6	553139088	11	8.74283	1576	99.3695		GGIQNVGHI	Inosine-5'-monophosphate dehydrogenase 2 OS=Mus musculus OX=10090 GN=Impdh2 PE=1 SV=2	Impdh2	308895456	9	8.48981	617	98.4051
INFDFPKL	Probable ATP-dependent RNA helicase DDX6 OS=Mus musculus OX=10090 GN=Ddx6 PE=1 SV=1	Ddx6	503332224	8	8.70185	1575	99.3064		SSRHPDSLSS	Interphotoreceptor matrix proteoglycan 2 OS=Mus musculus OX=10090 GN=Impg2 PE=1 SV=1	Impg2	274582944	10	8.43867	616	98.2456
NSIRNLDTI	Ataxin-10 OS=Mus musculus OX=10090 GN=Atxn10 PE=1 SV=2	Atxn10	465809280	9	8.66821	1574	99.2434		RLLGTEFQV	Membrane-associated transporter protein OS=Mus musculus OX=10090 GN=Slc45a2 PE=1 SV=1	Slc45a2	266894448	9	8.42634	615	98.0861
AGVRNPQQHL	Polyadenylate-binding protein 1 OS=Mus musculus OX=10090 GN=Pabpc1 PE=1 SV=2	Pabpc1	415456192	10	8.61853	1573	99.1803		PRKIEEIKDF	60S ribosomal protein L38 OS=Mus musculus OX=10090 GN=Rpl38 PE=1 SV=3	Rpl38	255555136	10	8.40748	614	97.9266
PLPVLGLGGL	Dual specificity protein phosphatase 6 OS=Mus musculus OX=10090 GN=Dusp6 PE=1 SV=1	Dusp6	410093865	10	8.61288	1572	99.1173		SLGSALRP	Vimentin OS=Mus musculus OX=10090 GN=Vim PE=1 SV=3	Vim	245254272	8	8.38962	613	97.7671
VNFEFPEF	40S ribosomal protein S7 OS=Mus musculus OX=10090 GN=Rps7 PE=2 SV=1	Rps7	391757696	8	8.59302	1571	99.0542		SAPENAVRM	Protein C10 OS=Mus musculus OX=10090 GN=Grcc10 PE=1 SV=1	Grcc10	217669968	9	8.3378	612	97.6077
KALINADEL	Spectrin alpha chain, non-erythrocytic 1 OS=Mus musculus OX=10090 GN=Sptan1 PE=1 SV=4	Sptan1	382024640	9	8.58209	1570	98.9912		SAPRNFVENF	Elongator complex protein 2 OS=Mus musculus OX=10090 GN=Elp2 PE=1 SV=1	Elp2	215287472	10	8.33302	611	97.4482
ASYEFVQRL	Cytoplasmic dynein 1 heavy chain 1 OS=Mus musculus OX=10090 GN=Dync1h1 PE=1 SV=2	Dync1h1	375924160	9	8.5751	1569	98.9281		FAHTNIESL	Protein disulfide-isomerase A3 OS=Mus musculus OX=10090 GN=Pdia3 PE=1 SV=2	Pdia3	203209424	9	8.30794	610	97.2887
RLLGTEFQV	Membrane-associated transporter protein OS=Mus musculus OX=10090 GN=Slc45a2 PE=1 SV=1	Slc45a2	3.72308e+08	9	8.5709	1568	98.8651		ASYEFVQRL	Cytoplasmic dynein 1 heavy chain 1 OS=Mus musculus OX=10090 GN=Dync1h1 PE=1 SV=2	Dync1h1	192399216	9	8.2842	609	97.1292
FAPVNVTTEVK	Elongation factor 1-alpha 1 OS=Mus musculus OX=10090 GN=Eef1a1 PE=1 SV=3	Eef1a1	350508448	11	8.5447	1567	98.802		FGPVNHEEL	Cyclin-dependent kinase inhibitor 1B OS=Mus musculus OX=10090 GN=Cdkn1b PE=1 SV=2	Cdkn1b	186094032	9	8.26973	608	96.9697
LHFFMPGFAPL	Tubulin beta-3 chain OS=Mus musculus OX=10090 GN=Tubb3 PE=1 SV=1;Tubulin beta-5 chain OS=Mus musculus OX=10090 GN=Tubb5 PE=1 SV=1;Tubulin beta-4B chain OS=Mus musculus OX=10090 GN=Tubb4b PE=1 SV=1;Tubulin beta-6 chain OS=Mus musculus OX=10090 GN=Tubb6 PE=1 SV=1	Tubb3	326859232	11	8.51436	1566	98.739		AMGVNLTSM	Proliferating cell nuclear antigen OS=Mus musculus OX=10090 GN=Pcna PE=1 SV=2	Pcna	166585664	9	8.22164	607	96.8102
FAHTNIESL	Protein disulfide-isomerase A3 OS=Mus musculus OX=10090 GN=Pdia3 PE=1 SV=2	Pdia3	326101632	9	8.51335	1565	98.6759		SSMSYPLQ	H(+)/Cl(-) exchange transporter 7 OS=Mus musculus OX=10090 GN=Clcn7 PE=1 SV=1	Clcn7	164972688	8	8.21741	606	96.6507
SAIINEDNL	Protein EFR3 homolog A OS=Mus musculus OX=10090 GN=Efr3a PE=1 SV=1	Efr3a	321777888	9	8.50756	1564	98.6129		VMVTNVTSL	Talin-2 OS=Mus musculus OX=10090 GN=Tln2 PE=1 SV=3;Talin-1 OS=Mus musculus OX=10090 GN=Tln1 PE=1 SV=2	Tln2	164427904	9	8.21598	605	96.4912
SAPRNFVENF	Elongator complex protein 2 OS=Mus musculus OX=10090 GN=Elp2 PE=1 SV=1	Elp2	308964416	10	8.48991	1563	98.5498		VNVDYSKL	Cytochrome c oxidase subunit NDUFA4 OS=Mus musculus OX=10090 GN=Ndufa4 PE=1 SV=2	Ndufa4	155636368	8	8.19211	604	96.3317
AGIFHFQF	Calpain-3 OS=Mus musculus OX=10090 GN=Capn3 PE=1 SV=2;Calpain-2 catalytic subunit OS=Mus musculus OX=10090 GN=Capn2 PE=1 SV=4	Capn3	303364896	8	8.48197	1562	98.4868		NLSKEDDVRQY	40S ribosomal protein S6 OS=Mus musculus OX=10090 GN=Rps6 PE=1 SV=1	Rps6	152993108	11	8.18467	603	96.1722
SAPENAVRM	Protein C10 OS=Mus musculus OX=10090 GN=Grcc10 PE=1 SV=1	Grcc10	300989568	9	8.47855	1561	98.4237		FLQALGLG	Neuromedin-U receptor 1 OS=Mus musculus OX=10090 GN=Nmur1 PE=2 SV=2	Nmur1	140351739	8	8.14722	602	96.0128
VGFDYKERL	Src substrate cortactin OS=Mus musculus OX=10090 GN=Cttn PE=1 SV=2	Cttn	294052808	9	8.46843	1560	98.3607		RAIENIDTL	Protein phosphatase 1 regulatory subunit 7 OS=Mus musculus OX=10090 GN=Ppp1r7 PE=1 SV=2	Ppp1r7	138940304	9	8.14283	601	95.8533
FGGSGTSSRP	Vimentin OS=Mus musculus OX=10090 GN=Vim PE=1 SV=3	Vim	270151968	10	8.43161	1559	98.2976		YVHVNRDTL	Bifunctional polynucleotide phosphatase/kinase OS=Mus musculus OX=10090 GN=Pnkp PE=1 SV=2	Pnkp	138486128	9	8.14141	600	95.6938
MAPQNLSTF	DnaJ homolog subfamily B member 11 OS=Mus musculus OX=10090 GN=Dnajb11 PE=1 SV=1	Dnajb11	252190624	9	8.40173	1558	98.2346		SAIINEDNL	Protein EFR3 homolog A OS=Mus musculus OX=10090 GN=Efr3a PE=1 SV=1	Efr3a	122665160	9	8.08872	599	95.5343
AIKKKDELERVA	40S ribosomal protein S5 OS=Mus musculus OX=10090 GN=Rps5 PE=1 SV=3	Rps5	247366600	12	8.39334	1557	98.1715		RSIKNVTEL	Replication termination factor 2 OS=Mus musculus OX=10090 GN=Rtf2 PE=1 SV=1	Rtf2	110737678	9	8.0443	598	95.3748
HGVVPLATYM	60S ribosomal protein L21 OS=Mus musculus OX=10090 GN=Rpl21 PE=1 SV=3	Rpl21	243458768	10	8.38643	1556	98.1084		AIKKKDELERVA	40S ribosomal protein S5 OS=Mus musculus OX=10090 GN=Rps5 PE=1 SV=3	Rps5	110407220	12	8.043	597	95.2153
SSIVNKEGL	Tropomodulin-1 OS=Mus musculus OX=10090 GN=Tmod1 PE=1 SV=2	Tmod1	233458496	9	8.36821	1555	98.0454		YAGSNFPEHI	Actin-related protein 2 OS=Mus musculus OX=10090 GN=Actr2 PE=1 SV=1	Actr2	109312472	10	8.03867	596	95.0558
SAVKNLQQL	GATOR complex protein NPRL3 OS=Mus musculus OX=10090 GN=Nprl3 PE=1 SV=1	Nprl3	230142368	9	8.362	1554	97.9823		FTASISAYMAA	CKLF-like MARVEL transmembrane domain-containing protein 5 OS=Mus musculus OX=10090 GN=Cmtm5 PE=1 SV=1	Cmtm5	108794568	11	8.03661	595	94.8963
VNVDYSKL	Cytochrome c oxidase subunit NDUFA4 OS=Mus musculus OX=10090 GN=Ndufa4 PE=1 SV=2	Ndufa4	224291040	8	8.35081	1553	97.9193		FIDGHTKILT	Oogenesin-2 OS=Mus musculus OX=10090 GN=Oog2 PE=2 SV=1	Oog2	108516828	10	8.0355	594	94.7368
FGPVNHEEL	Cyclin-dependent kinase inhibitor 1B OS=Mus musculus OX=10090 GN=Cdkn1b PE=1 SV=2	Cdkn1b	217424816	9	8.33731	1552	97.8562		FAPVNVTTEVK	Elongation factor 1-alpha 1 OS=Mus musculus OX=10090 GN=Eef1a1 PE=1 SV=3	Eef1a1	107369080	11	8.03088	593	94.5774
VKVGVNGF	Glyceraldehyde-3-phosphate dehydrogenase OS=Mus musculus OX=10090 GN=Gapdh PE=1 SV=2	Gapdh	211277792	8	8.32485	1551	97.7932		SAVKNLQQL	GATOR complex protein NPRL3 OS=Mus musculus OX=10090 GN=Nprl3 PE=1 SV=1	Nprl3	103907872	9	8.01665	592	94.4179
GPEGERPARF	40S ribosomal protein S10 OS=Mus musculus OX=10090 GN=Rps10 PE=1 SV=1	Rps10	210323156	10	8.32289	1550	97.7301		GGVVNMYHM	Proteasome subunit beta type-8 OS=Mus musculus OX=10090 GN=Psmb8 PE=1 SV=2	Psmb8	102673424	9	8.01146	591	94.2584
IREEYPDRIM	Tubulin beta-5 chain OS=Mus musculus OX=10090 GN=Tubb5 PE=1 SV=1;Tubulin beta-4B chain OS=Mus musculus OX=10090 GN=Tubb4b PE=1 SV=1;Tubulin beta-6 chain OS=Mus musculus OX=10090 GN=Tubb6 PE=1 SV=1	Tubb5	207819570	10	8.31769	1549	97.6671		AAILGYDEGI	Ubiquinol-cytochrome-c reductase complex assembly factor 1 OS=Mus musculus OX=10090 GN=Uqcc1 PE=1 SV=1	Uqcc1	101602336	10	8.0069	590	94.0989
RVPTPNVSVVD	Glyceraldehyde-3-phosphate dehydrogenase OS=Mus musculus OX=10090 GN=Gapdh PE=1 SV=2	Gapdh	200278384	11	8.30163	1548	97.604		MLIFSVAFIT	Lysosomal-associated transmembrane protein 5 OS=Mus musculus OX=10090 GN=Laptm5 PE=1 SV=1	Laptm5	97140744	10	7.9874	589	93.9394
RSLLLLAPL	Procollagen-lysine,2-oxoglutarate 5-dioxygenase 1 OS=Mus musculus OX=10090 GN=Plod1 PE=1 SV=1	Plod1	194650944	9	8.28926	1547	97.541		MAPQNLSTF	DnaJ homolog subfamily B member 11 OS=Mus musculus OX=10090 GN=Dnajb11 PE=1 SV=1	Dnajb11	96133504	9	7.98287	588	93.7799
RTVENVTVF	Synaptic vesicle membrane protein VAT-1 homolog OS=Mus musculus OX=10090 GN=Vat1 PE=1 SV=3	Vat1	194632240	9	8.28921	1546	97.4779		KIFEFKETL	Calcium/calmodulin-dependent protein kinase type 1D OS=Mus musculus OX=10090 GN=Camk1d PE=1 SV=2	Camk1d	93581856	9	7.97119	587	93.6204
RAIENIDTL	Protein phosphatase 1 regulatory subunit 7 OS=Mus musculus OX=10090 GN=Ppp1r7 PE=1 SV=2	Ppp1r7	194530896	9	8.28899	1545	97.4149		RDSAYISSS	Protein TANC2 OS=Mus musculus OX=10090 GN=Tanc2 PE=1 SV=1	Tanc2	91949664	9	7.96355	586	93.4609
SSPKFSEI	Cytoskeleton-associated protein 5 OS=Mus musculus OX=10090 GN=Ckap5 PE=1 SV=1;WD repeat domain phosphoinositide-interacting protein 4 OS=Mus musculus OX=10090 GN=Wdr45 PE=1 SV=1	Ckap5	190514128	8	8.27993	1544	97.3518		AGIFHFQF	Calpain-3 OS=Mus musculus OX=10090 GN=Capn3 PE=1 SV=2	Capn3	90548304	8	7.95688	585	93.3014
FTASISAYMAA	CKLF-like MARVEL transmembrane domain-containing protein 5 OS=Mus musculus OX=10090 GN=Cmtm5 PE=1 SV=1	Cmtm5	186517408	11	8.27072	1543	97.2888		EIYEFHKM	Neutrophil cytosol factor 1 OS=Mus musculus OX=10090 GN=Ncf1 PE=1 SV=3	Ncf1	84752464	8	7.92815	584	93.1419
IGIENIHYL	Malignant T-cell-amplified sequence 2 OS=Mus musculus OX=10090 GN=Mcts2 PE=1 SV=1	Mcts2	179197104	9	8.25333	1542	97.2257		VGIENIHVM	Myotubularin-related protein 6 OS=Mus musculus OX=10090 GN=Mtmr6 PE=1 SV=1	Mtmr6	78659208	9	7.89575	583	92.9825
HGFREGTTP	60S ribosomal protein L37 OS=Mus musculus OX=10090 GN=Rpl37 PE=3 SV=3	Rpl37	169984464	9	8.23041	1541	97.1627		HGVVPLATYM	60S ribosomal protein L21 OS=Mus musculus OX=10090 GN=Rpl21 PE=1 SV=3	Rpl21	76307688	10	7.88257	582	92.823
SQPVNPHSL	Zinc finger SWIM domain-containing protein 8 OS=Mus musculus OX=10090 GN=Zswim8 PE=1 SV=1	Zswim8	165994704	9	8.22009	1540	97.0996		TSVRFTQL	Nitric oxide synthase-interacting protein OS=Mus musculus OX=10090 GN=Nosip PE=1 SV=1	Nosip	75930408	8	7.88042	581	92.6635
TAQVIILNHPG	Elongation factor 1-alpha 1 OS=Mus musculus OX=10090 GN=Eef1a1 PE=1 SV=3	Eef1a1	157394448	11	8.19699	1539	97.0366		TAVVNRVFDKL	Proteasome subunit beta type-9 OS=Mus musculus bactrianus OX=35531 GN=Psmb9 PE=1 SV=1	Psmb9	75833668	11	7.87986	580	92.504
ASVLNVNHI	Ankyrin repeat domain-containing protein 17 OS=Mus musculus OX=10090 GN=Ankrd17 PE=1 SV=2	Ankrd17	156942528	9	8.19574	1538	96.9735		VKVGVNGF	Glyceraldehyde-3-phosphate dehydrogenase OS=Mus musculus OX=10090 GN=Gapdh PE=1 SV=2	Gapdh	75696512	8	7.87908	579	92.3445
YNEATGGKYVP	Tubulin beta-5 chain OS=Mus musculus OX=10090 GN=Tubb5 PE=1 SV=1;Tubulin beta-4B chain OS=Mus musculus OX=10090 GN=Tubb4b PE=1 SV=1	Tubb5	156370208	11	8.19415	1537	96.9105		AAPRPPPKPM	40S ribosomal protein S26 OS=Mus musculus OX=10090 GN=Rps26 PE=1 SV=3	Rps26	74237346	10	7.87062	578	92.185
SYYLAVSDL	Cytochrome P450 4B1 OS=Mus musculus OX=10090 GN=Cyp4b1 PE=1 SV=1	Cyp4b1	148919392	9	8.17295	1536	96.8474		KMEISQLT	Centrosomal protein of 63 kDa OS=Mus musculus OX=10090 GN=Cep63 PE=1 SV=2	Cep63	74098432	8	7.86981	577	92.0255
TALENLSTL	Fatty acid synthase OS=Mus musculus OX=10090 GN=Fasn PE=1 SV=2	Fasn	147521616	9	8.16886	1535	96.7844		RVPTPNVSVVD	Glyceraldehyde-3-phosphate dehydrogenase OS=Mus musculus OX=10090 GN=Gapdh PE=1 SV=2	Gapdh	73328024	11	7.86527	576	91.866
ATLKDITRRL	ATP synthase subunit gamma, mitochondrial OS=Mus musculus OX=10090 GN=Atp5f1c PE=1 SV=1	Atp5f1c	147289936	10	8.16817	1534	96.7213		SSPKFSEI	Cytoskeleton-associated protein 5 OS=Mus musculus OX=10090 GN=Ckap5 PE=1 SV=1	Ckap5	72985176	8	7.86323	575	91.7065
SIAAFIQRL	Large proline-rich protein BAG6 OS=Mus musculus OX=10090 GN=Bag6 PE=1 SV=1	Bag6	147217616	9	8.16796	1533	96.6583		QSIEFSRL	Eukaryotic translation initiation factor 3 subunit A OS=Mus musculus OX=10090 GN=Eif3a PE=1 SV=5	Eif3a	72865792	8	7.86252	574	91.547
SGPTNEDLYI	3-hydroxy-3-methylglutaryl-coenzyme A reductase OS=Mus musculus OX=10090 GN=Hmgcr PE=1 SV=3	Hmgcr	146503152	10	8.16585	1532	96.5952		SVYVYKVL	Histone H2B type 1-F/J/L OS=Mus musculus OX=10090 GN=H2bc7 PE=1 SV=2	H2bc7	72806064	8	7.86217	573	91.3876
FIDTTSKF	60S ribosomal protein L3 OS=Mus musculus OX=10090 GN=Rpl3 PE=1 SV=3	Rpl3	144005808	8	8.15838	1531	96.5322		GAVQNIAHL	Armadillo repeat-containing protein 8 OS=Mus musculus OX=10090 GN=Armc8 PE=1 SV=2	Armc8	72126744	9	7.8581	572	91.2281
AAPRPPPKPM	40S ribosomal protein S26 OS=Mus musculus OX=10090 GN=Rps26 PE=1 SV=3	Rps26	136513992	10	8.13518	1530	96.4691		SAIMNPASKVI	Clathrin heavy chain 1 OS=Mus musculus OX=10090 GN=Cltc PE=1 SV=3	Cltc	71043312	11	7.85152	571	91.0686
AGPTNVHLI	Homeobox protein SIX5 OS=Mus musculus OX=10090 GN=Six5 PE=1 SV=2	Six5	129362056	9	8.11181	1529	96.4061		AGVRNPQQHL	Polyadenylate-binding protein 1 OS=Mus musculus OX=10090 GN=Pabpc1 PE=1 SV=2	Pabpc1	70713760	10	7.8495	570	90.9091
LGLGLGLG	Inactive ribonuclease-like protein 10 OS=Mus musculus OX=10090 GN=Rnase10 PE=1 SV=1;Ectonucleotide pyrophosphatase/phosphodiesterase family member 3 OS=Mus musculus OX=10090 GN=Enpp3 PE=1 SV=2	Rnase10	127855882	8	8.10672	1528	96.343		RTVENVTVF	Synaptic vesicle membrane protein VAT-1 homolog OS=Mus musculus OX=10090 GN=Vat1 PE=1 SV=3	Vat1	70703152	9	7.84944	569	90.7496
GIGQDIQPKRDL	60S ribosomal protein L7a OS=Mus musculus OX=10090 GN=Rpl7a PE=1 SV=2	Rpl7a	127082482	12	8.10409	1527	96.2799		IYDKDPEGTVQP	Cysteine-rich protein 2 OS=Mus musculus OX=10090 GN=Crip2 PE=1 SV=1	Crip2	70508760	12	7.84824	568	90.5901
SSSPGGAYVTR	Vimentin OS=Mus musculus OX=10090 GN=Vim PE=1 SV=3	Vim	118023656	11	8.07197	1526	96.2169		FGIHNGVETL	Glycerophosphocholine phosphodiesterase GPCPD1 OS=Mus musculus OX=10090 GN=Gpcpd1 PE=1 SV=1	Gpcpd1	70443208	10	7.84784	567	90.4306
KIGGIGTVPVG	Elongation factor 1-alpha 1 OS=Mus musculus OX=10090 GN=Eef1a1 PE=1 SV=3	Eef1a1	115222304	11	8.06154	1525	96.1538		IGGIGTVPVGR	Elongation factor 1-alpha 1 OS=Mus musculus OX=10090 GN=Eef1a1 PE=1 SV=3	Eef1a1	68384520	11	7.83496	566	90.2711
KVGIVGKY	60S ribosomal protein L37a OS=Mus musculus OX=10090 GN=Rpl37a PE=1 SV=2	Rpl37a	113878448	8	8.05644	1524	96.0908		FAYEGRDYI	H-2 class I histocompatibility antigen, D-B alpha chain OS=Mus musculus OX=10090 GN=H2-D1 PE=1 SV=2	H2-D1	67252368	9	7.82771	565	90.1116
TSVRFTQL	Nitric oxide synthase-interacting protein OS=Mus musculus OX=10090 GN=Nosip PE=1 SV=1	Nosip	113799392	8	8.05614	1523	96.0277		SSIVNKEGL	Tropomodulin-1 OS=Mus musculus OX=10090 GN=Tmod1 PE=1 SV=2	Tmod1	63319244	9	7.80154	564	89.9522
TGPSNVDKL	Serine/threonine-protein kinase Chk1 OS=Mus musculus OX=10090 GN=Chek1 PE=1 SV=2	Chek1	111972336	9	8.04911	1522	95.9647		KKPAGATP	Histone H1.5 OS=Mus musculus OX=10090 GN=H1-5 PE=1 SV=2	H1-5	61998393	8	7.79238	563	89.7927
VESFSDYPPLGR	Elongation factor 1-alpha 1 OS=Mus musculus OX=10090 GN=Eef1a1 PE=1 SV=3	Eef1a1	111761336	12	8.04829	1521	95.9016		ASLLEEADY	Titin OS=Mus musculus OX=10090 GN=Ttn PE=1 SV=1	Ttn	60396844	9	7.78101	562	89.6332
VAPEFRRL	N-alpha-acetyltransferase 20 OS=Mus musculus OX=10090 GN=Naa20 PE=1 SV=1	Naa20	110026336	8	8.0415	1520	95.8386		ATLKDITRRL	ATP synthase subunit gamma, mitochondrial OS=Mus musculus OX=10090 GN=Atp5f1c PE=1 SV=1	Atp5f1c	59863500	10	7.77716	561	89.4737
LPNLQVLD	Leucine-rich repeat-containing G-protein coupled receptor 5 OS=Mus musculus OX=10090 GN=Lgr5 PE=2 SV=2	Lgr5	109962808	8	8.04125	1519	95.7755		SGYKFGVL	General transcription factor IIE subunit 2 OS=Mus musculus OX=10090 GN=Gtf2e2 PE=1 SV=2	Gtf2e2	59439776	8	7.77408	560	89.3142
ATIINEEVL	Signal recognition particle 54 kDa protein OS=Mus musculus OX=10090 GN=Srp54 PE=1 SV=2	Srp54	109731000	9	8.04033	1518	95.7125		AAMKNVTEL	14-3-3 protein gamma OS=Mus musculus OX=10090 GN=Ywhag PE=1 SV=2	Ywhag	55657588	9	7.74552	559	89.1547
TLLIKTVETR	Vimentin OS=Mus musculus OX=10090 GN=Vim PE=1 SV=3	Vim	109022536	10	8.03752	1517	95.6494		RAYLFAHV	Pre-rRNA-processing protein TSR1 homolog OS=Mus musculus OX=10090 GN=Tsr1 PE=1 SV=1	Tsr1	55306136	8	7.74277	558	88.9952
VGVNGFGR	Glyceraldehyde-3-phosphate dehydrogenase OS=Mus musculus OX=10090 GN=Gapdh PE=1 SV=2	Gapdh	108847304	8	8.03682	1516	95.5864		SGLLNQQSL	Mediator of RNA polymerase II transcription subunit 27 OS=Mus musculus OX=10090 GN=Med27 PE=2 SV=2	Med27	55099888	9	7.74115	557	88.8357
LEDPQTHSNRIY	Heat shock protein HSP 90-beta OS=Mus musculus OX=10090 GN=Hsp90ab1 PE=1 SV=3	Hsp90ab1	108712807	12	8.03628	1515	95.5233		SGPTNEDLYI	3-hydroxy-3-methylglutaryl-coenzyme A reductase OS=Mus musculus OX=10090 GN=Hmgcr PE=1 SV=3	Hmgcr	54804632	10	7.73882	556	88.6762
DAGAGIALNDNF	Glyceraldehyde-3-phosphate dehydrogenase OS=Mus musculus OX=10090 GN=Gapdh PE=1 SV=2	Gapdh	108272984	12	8.03452	1514	95.4603		VAFDFTKV	Phosphatidylinositol-binding clathrin assembly protein OS=Mus musculus OX=10090 GN=Picalm PE=1 SV=1	Picalm	53636228	8	7.72946	555	88.5167
KQTINPILL	Long-chain-fatty-acid--CoA ligase 3 OS=Mus musculus OX=10090 GN=Acsl3 PE=1 SV=2	Acsl3	108012968	9	8.03348	1513	95.3972		GAVKNLTYF	CMP-N-acetylneuraminate-beta-galactosamide-alpha-2,3-sialyltransferase 4 OS=Mus musculus OX=10090 GN=St3gal4 PE=1 SV=1	St3gal4	53181640	9	7.72576	554	88.3573
VGIENIHVM	Myotubularin-related protein 6 OS=Mus musculus OX=10090 GN=Mtmr6 PE=1 SV=1	Mtmr6	107394952	9	8.03098	1512	95.3342		SGLKYVNV	Adenylate kinase isoenzyme 6 OS=Mus musculus OX=10090 GN=Ak6 PE=1 SV=1	Ak6	51905648	8	7.71521	553	88.1978
NEATGGKYVP	Tubulin beta-5 chain OS=Mus musculus OX=10090 GN=Tubb5 PE=1 SV=1;Tubulin beta-4B chain OS=Mus musculus OX=10090 GN=Tubb4b PE=1 SV=1	Tubb5	107194280	10	8.03017	1511	95.2711		SQHVNLDQL	Beclin 1-associated autophagy-related key regulator OS=Mus musculus OX=10090 GN=Atg14 PE=1 SV=1	Atg14	51167208	9	7.70899	552	88.0383
RDSAYISSS	Protein TANC2 OS=Mus musculus OX=10090 GN=Tanc2 PE=1 SV=1	Tanc2	107097886	9	8.02978	1510	95.2081		TAQVIILNHPG	Elongation factor 1-alpha 1 OS=Mus musculus OX=10090 GN=Eef1a1 PE=1 SV=3	Eef1a1	51151608	11	7.70886	551	87.8788
KIKIIAPPERKY	Actin, cytoplasmic 1 OS=Mus musculus OX=10090 GN=Actb PE=1 SV=1;Actin, alpha cardiac muscle 1 OS=Mus musculus OX=10090 GN=Actc1 PE=1 SV=1	Actb	106765292	12	8.02843	1509	95.145		RQPSIELPSM	Lymphocyte-specific protein 1 OS=Mus musculus OX=10090 GN=Lsp1 PE=1 SV=2	Lsp1	51130964	10	7.70868	550	87.7193
KKDWYDVKAP	40S ribosomal protein S3a OS=Mus musculus OX=10090 GN=Rps3a PE=1 SV=3	Rps3a	106379704	10	8.02686	1508	95.082		HGFREGTTP	60S ribosomal protein L37 OS=Mus musculus OX=10090 GN=Rpl37 PE=3 SV=3	Rpl37	50458016	9	7.70293	549	87.5598
GKLTGMAF	Glyceraldehyde-3-phosphate dehydrogenase OS=Mus musculus OX=10090 GN=Gapdh PE=1 SV=2	Gapdh	106290184	8	8.02649	1507	95.0189		IREEYPDRIM	Tubulin beta-5 chain OS=Mus musculus OX=10090 GN=Tubb5 PE=1 SV=1;Tubulin beta-4B chain OS=Mus musculus OX=10090 GN=Tubb4b PE=1 SV=1	Tubb5	50216560	10	7.70085	548	87.4003
AREIFDSRGNP	Alpha-enolase OS=Mus musculus OX=10090 GN=Eno1 PE=1 SV=3	Eno1	106058360	11	8.02554	1506	94.9559		FIDTTSKF	60S ribosomal protein L3 OS=Mus musculus OX=10090 GN=Rpl3 PE=1 SV=3	Rpl3	50184356	8	7.70057	547	87.2408
KNLQTVNVDEN	60S ribosomal protein L31 OS=Mus musculus OX=10090 GN=Rpl31 PE=1 SV=1	Rpl31	105004104	11	8.02121	1505	94.8928		LQHSPTILQ	Kinesin-like protein KIF20B OS=Mus musculus OX=10090 GN=Kif20b PE=1 SV=3	Kif20b	49681776	9	7.6962	546	87.0813
VMYKFLTV	Caveolin-2 OS=Mus musculus OX=10090 GN=Cav2 PE=1 SV=1	Cav2	104384176	8	8.01863	1504	94.8298		REPDTFMDQKI	Cadherin-1 OS=Mus musculus OX=10090 GN=Cdh1 PE=1 SV=1	Cdh1	48272700	11	7.6837	545	86.9219
TLIRPDGEKKAY	60S ribosomal protein L23a OS=Mus musculus OX=10090 GN=Rpl23a PE=1 SV=1	Rpl23a	1.03562e+08	12	8.0152	1503	94.7667		KAPDNRETL	Dolichyl-diphosphooligosaccharide--protein glycosyltransferase subunit STT3B OS=Mus musculus OX=10090 GN=Stt3b PE=1 SV=2	Stt3b	48228344	9	7.6833	544	86.7624
KAPTNEFYA	Syndecan-4 OS=Mus musculus OX=10090 GN=Sdc4 PE=1 SV=1	Sdc4	103490584	9	8.0149	1502	94.7037		SQPVNPHSL	Zinc finger SWIM domain-containing protein 8 OS=Mus musculus OX=10090 GN=Zswim8 PE=1 SV=1	Zswim8	47410788	9	7.67588	543	86.6029
YLAPKIEDEEAS	Proliferating cell nuclear antigen OS=Mus musculus OX=10090 GN=Pcna PE=1 SV=2	Pcna	103480040	12	8.01486	1501	94.6406		IAFSCPVFT	Solute carrier family 35 member G1 OS=Mus musculus OX=10090 GN=Slc35g1 PE=2 SV=1	Slc35g1	47313623	9	7.67499	542	86.4434
SETGAGKHVPR	Tubulin alpha-1A chain OS=Mus musculus OX=10090 GN=Tuba1a PE=1 SV=1;Tubulin alpha-1C chain OS=Mus musculus OX=10090 GN=Tuba1c PE=1 SV=1	Tuba1a	101622776	11	8.00699	1500	94.5776		SLGKNPTDAYL	Myosin regulatory light chain 12B OS=Mus musculus OX=10090 GN=Myl12b PE=1 SV=2	Myl12b	47269108	11	7.67458	541	86.2839
FGQSGAGNNW	Tubulin beta-3 chain OS=Mus musculus OX=10090 GN=Tubb3 PE=1 SV=1;Tubulin beta-5 chain OS=Mus musculus OX=10090 GN=Tubb5 PE=1 SV=1;Tubulin beta-4B chain OS=Mus musculus OX=10090 GN=Tubb4b PE=1 SV=1	Tubb3	99820624	10	7.99922	1499	94.5145		SSYTFPKM	Enoyl-CoA delta isomerase 2 OS=Mus musculus OX=10090 GN=Eci2 PE=1 SV=2	Eci2	46693208	8	7.66925	540	86.1244
LRDNSTMGY	Heat shock protein HSP 90-alpha OS=Mus musculus OX=10090 GN=Hsp90aa1 PE=1 SV=4;Heat shock protein HSP 90-beta OS=Mus musculus OX=10090 GN=Hsp90ab1 PE=1 SV=3	Hsp90aa1	99267384	9	7.99681	1498	94.4515		AAITNKYQL	RNA polymerase I-specific transcription initiation factor RRN3 OS=Mus musculus OX=10090 GN=Rrn3 PE=1 SV=1	Rrn3	46489312	9	7.66735	539	85.9649
IGITNHDEY	Talin-1 OS=Mus musculus OX=10090 GN=Tln1 PE=1 SV=2	Tln1	97910568	9	7.99083	1497	94.3884		AGPTNVHLI	Homeobox protein SIX5 OS=Mus musculus OX=10090 GN=Six5 PE=1 SV=2	Six5	46487780	9	7.66734	538	85.8054
ERPTYTNL	Tubulin alpha-8 chain OS=Mus musculus OX=10090 GN=Tuba8 PE=1 SV=1;Tubulin alpha-1A chain OS=Mus musculus OX=10090 GN=Tuba1a PE=1 SV=1;Tubulin alpha-1C chain OS=Mus musculus OX=10090 GN=Tuba1c PE=1 SV=1	Tuba8	97324360	8	7.98822	1496	94.3253		SMVQNRVFL	Dedicator of cytokinesis protein 2 OS=Mus musculus OX=10090 GN=Dock2 PE=1 SV=3	Dock2	46177812	9	7.66443	537	85.6459
KGPEGERPA	40S ribosomal protein S10 OS=Mus musculus OX=10090 GN=Rps10 PE=1 SV=1	Rps10	96142336	9	7.98291	1495	94.2623		NGPQNIYNL	Ribonuclease kappa OS=Mus musculus OX=10090 GN=Rnasek PE=3 SV=1	Rnasek	45354144	9	7.65662	536	85.4864
LAPKIEDEEAS	Proliferating cell nuclear antigen OS=Mus musculus OX=10090 GN=Pcna PE=1 SV=2	Pcna	92818632	11	7.96764	1494	94.1992		VDQLDFWE	Neuronal acetylcholine receptor subunit alpha-4 OS=Mus musculus OX=10090 GN=Chrna4 PE=1 SV=2	Chrna4	44272464	8	7.64613	535	85.327
IPGKDPDSP	Transmembrane glycoprotein NMB OS=Mus musculus OX=10090 GN=Gpnmb PE=1 SV=2	Gpnmb	92539528	9	7.96633	1493	94.1362		GSVRNAVVL	WD repeat- and FYVE domain-containing protein 4 OS=Mus musculus OX=10090 GN=Wdfy4 PE=1 SV=2	Wdfy4	44243092	9	7.64585	534	85.1675
KIGGIGTVP	Elongation factor 1-alpha 1 OS=Mus musculus OX=10090 GN=Eef1a1 PE=1 SV=3	Eef1a1	92136056	9	7.96443	1492	94.0731		VSILNRQVL	Nuclear mitotic apparatus protein 1 OS=Mus musculus OX=10090 GN=Numa1 PE=1 SV=1	Numa1	44207108	9	7.64549	533	85.008
PEPAKSAPAPK	Histone H2B type 1-F/J/L OS=Mus musculus OX=10090 GN=H2bc7 PE=1 SV=2	H2bc7	91513728	11	7.96149	1491	94.0101		SSLVNSQTL	TGF-beta-activated kinase 1 and MAP3K7-binding protein 2 OS=Mus musculus OX=10090 GN=Tab2 PE=1 SV=1	Tab2	43426024	9	7.63775	532	84.8485
VSLLNPPETL	Cyclin-A2 OS=Mus musculus OX=10090 GN=Ccna2 PE=1 SV=2	Ccna2	91004192	10	7.95906	1490	93.947		KTVVNKDVF	60S ribosomal protein L27 OS=Mus musculus OX=10090 GN=Rpl27 PE=1 SV=2	Rpl27	43175896	9	7.63524	531	84.689
AAVIAHDFL	G1/S-specific cyclin-D3 OS=Mus musculus OX=10090 GN=Ccnd3 PE=1 SV=1	Ccnd3	90076328	9	7.95461	1489	93.884		YNEATGGKYVP	Tubulin beta-5 chain OS=Mus musculus OX=10090 GN=Tubb5 PE=1 SV=1;Tubulin beta-4B chain OS=Mus musculus OX=10090 GN=Tubb4b PE=1 SV=1	Tubb5	43057696	11	7.63405	530	84.5295
SLAQKKDRVAQ	60S ribosomal protein L5 OS=Mus musculus OX=10090 GN=Rpl5 PE=1 SV=3	Rpl5	89046408	11	7.94962	1488	93.8209		GAVTNVKVI	ELAV-like protein 3 OS=Mus musculus OX=10090 GN=Elavl3 PE=1 SV=1	Elavl3	41492720	9	7.61797	529	84.37
RTIGISVDPRR	60S ribosomal protein L13 OS=Mus musculus OX=10090 GN=Rpl13 PE=1 SV=3	Rpl13	88365624	11	7.94628	1487	93.7579		TGPSNVDKL	Serine/threonine-protein kinase Chk1 OS=Mus musculus OX=10090 GN=Chek1 PE=1 SV=2	Chek1	41129424	9	7.61415	528	84.2105
SAIMNPASKVI	Clathrin heavy chain 1 OS=Mus musculus OX=10090 GN=Cltc PE=1 SV=3	Cltc	88282272	11	7.94587	1486	93.6948		QSLVFKLS	Adhesion G-protein coupled receptor G5 OS=Mus musculus OX=10090 GN=Adgrg5 PE=1 SV=3	Adgrg5	41089060	8	7.61373	527	84.051
KAPDNRETL	Dolichyl-diphosphooligosaccharide--protein glycosyltransferase subunit STT3B OS=Mus musculus OX=10090 GN=Stt3b PE=1 SV=2	Stt3b	87866568	9	7.94382	1485	93.6318		RNYSYEKL	Junction plakoglobin OS=Mus musculus OX=10090 GN=Jup PE=1 SV=3	Jup	40326016	8	7.60559	526	83.8915
AMGVNLTSM	Proliferating cell nuclear antigen OS=Mus musculus OX=10090 GN=Pcna PE=1 SV=2	Pcna	86970864	9	7.93937	1484	93.5687		VQNKNSSYF	Tubulin beta-5 chain OS=Mus musculus OX=10090 GN=Tubb5 PE=1 SV=1;Tubulin beta-4B chain OS=Mus musculus OX=10090 GN=Tubb4b PE=1 SV=1	Tubb5	40013208	9	7.6022	525	83.7321
KDTVYCVAYAK	Intraflagellar transport protein 122 homolog OS=Mus musculus OX=10090 GN=Ift122 PE=1 SV=1	Ift122	86789727	11	7.93847	1483	93.5057		NGVINAAFM	Phosphatidylinositol-binding clathrin assembly protein OS=Mus musculus OX=10090 GN=Picalm PE=1 SV=1	Picalm	39779736	9	7.59966	524	83.5726
YNEATGGKYVPR	Tubulin beta-5 chain OS=Mus musculus OX=10090 GN=Tubb5 PE=1 SV=1;Tubulin beta-4B chain OS=Mus musculus OX=10090 GN=Tubb4b PE=1 SV=1	Tubb5	8.53361e+07	12	7.93113	1482	93.4426		PNRVTKVAVK	Fibroblast growth factor receptor 1 OS=Mus musculus OX=10090 GN=Fgfr1 PE=1 SV=2	Fgfr1	39718488	10	7.59899	523	83.4131
KSMENLIEL	Tubby-related protein 3 OS=Mus musculus OX=10090 GN=Tulp3 PE=1 SV=1	Tulp3	85165104	9	7.93026	1481	93.3796		KIGGIGTVPVG	Elongation factor 1-alpha 1 OS=Mus musculus OX=10090 GN=Eef1a1 PE=1 SV=3	Eef1a1	39606896	11	7.59777	522	83.2536
ESILGGVLK	Dedicator of cytokinesis protein 7 OS=Mus musculus OX=10090 GN=Dock7 PE=1 SV=3	Dock7	82961456	9	7.91888	1480	93.3165		YAPINANAI	Metastasis-associated protein MTA2 OS=Mus musculus OX=10090 GN=Mta2 PE=1 SV=1	Mta2	38621516	9	7.58683	521	83.0941
AVLSAEKLRDE	Serpin H1 OS=Mus musculus OX=10090 GN=Serpinh1 PE=1 SV=3	Serpinh1	82606643	11	7.91701	1479	93.2535		SSLESSFTL	Dedicator of cytokinesis protein 11 OS=Mus musculus OX=10090 GN=Dock11 PE=1 SV=1	Dock11	38249832	9	7.58263	520	82.9346
TEDVPRKLL	60S ribosomal protein L6 OS=Mus musculus OX=10090 GN=Rpl6 PE=1 SV=3	Rpl6	82516752	9	7.91654	1478	93.1904		VNIEFKDL	ATP-binding cassette sub-family G member 1 OS=Mus musculus OX=10090 GN=Abcg1 PE=1 SV=1	Abcg1	37931704	8	7.579	519	82.7751
AVGDIPGVRF	40S ribosomal protein S23 OS=Mus musculus OX=10090 GN=Rps23 PE=1 SV=3	Rps23	81298008	10	7.91008	1477	93.1274		AQYGNILKHVM	Nucleoporin NUP35 OS=Mus musculus OX=10090 GN=Nup35 PE=1 SV=2	Nup35	37708600	11	7.57644	518	82.6156
FFMPGFAPL	Tubulin beta-3 chain OS=Mus musculus OX=10090 GN=Tubb3 PE=1 SV=1;Tubulin beta-5 chain OS=Mus musculus OX=10090 GN=Tubb5 PE=1 SV=1;Tubulin beta-4B chain OS=Mus musculus OX=10090 GN=Tubb4b PE=1 SV=1;Tubulin beta-6 chain OS=Mus musculus OX=10090 GN=Tubb6 PE=1 SV=1	Tubb3	79953840	9	7.90284	1476	93.0643		SEGKPAAEEL	Syntaxin-18 OS=Mus musculus OX=10090 GN=Stx18 PE=1 SV=2	Stx18	37529604	10	7.57437	517	82.4561
GINKIGGMEGP	Heterogeneous nuclear ribonucleoprotein M OS=Mus musculus OX=10090 GN=Hnrnpm PE=1 SV=3	Hnrnpm	79628480	11	7.90107	1475	93.0013		NEATGGKYVP	Tubulin beta-5 chain OS=Mus musculus OX=10090 GN=Tubb5 PE=1 SV=1;Tubulin beta-4B chain OS=Mus musculus OX=10090 GN=Tubb4b PE=1 SV=1	Tubb5	36455268	10	7.56176	516	82.2967
VTVNESLLAP	Keratin, type II cytoskeletal 71 OS=Mus musculus OX=10090 GN=Krt71 PE=1 SV=1	Krt71	78203856	10	7.89323	1474	92.9382		KVGIVGKY	60S ribosomal protein L37a OS=Mus musculus OX=10090 GN=Rpl37a PE=1 SV=2	Rpl37a	36289352	8	7.55978	515	82.1372
KATKYLKDVTLK	60S ribosomal protein L17 OS=Mus musculus OX=10090 GN=Rpl17 PE=1 SV=3	Rpl17	77617802	12	7.88996	1473	92.8752		HAIRNSFQYL	Myotubularin-related protein 4 OS=Mus musculus OX=10090 GN=Mtmr4 PE=1 SV=1	Mtmr4	35844940	10	7.55443	514	81.9777
ELNGKLTGMAF	Glyceraldehyde-3-phosphate dehydrogenase OS=Mus musculus OX=10090 GN=Gapdh PE=1 SV=2	Gapdh	76712464	11	7.88487	1472	92.8121		NDFVFVSSSS	DmX-like protein 1 OS=Mus musculus OX=10090 GN=Dmxl1 PE=1 SV=1	Dmxl1	35688024	10	7.55252	513	81.8182
AVTVAPPGAR	Heterogeneous nuclear ribonucleoprotein U OS=Mus musculus OX=10090 GN=Hnrnpu PE=1 SV=1	Hnrnpu	75892680	10	7.8802	1471	92.7491		YLAPKIEDEEAS	Proliferating cell nuclear antigen OS=Mus musculus OX=10090 GN=Pcna PE=1 SV=2	Pcna	35447440	12	7.54958	512	81.6587
QASEGPLKGILG	Glyceraldehyde-3-phosphate dehydrogenase OS=Mus musculus OX=10090 GN=Gapdh PE=1 SV=2	Gapdh	75756040	12	7.87942	1470	92.686		VESFSDYPPLGR	Elongation factor 1-alpha 1 OS=Mus musculus OX=10090 GN=Eef1a1 PE=1 SV=3	Eef1a1	35190692	12	7.54643	511	81.4992
WALERAKL	Uronyl 2-sulfotransferase OS=Mus musculus OX=10090 GN=Ust PE=2 SV=3	Ust	75666432	8	7.8789	1469	92.623		SPGGAYVTRSS	Vimentin OS=Mus musculus OX=10090 GN=Vim PE=1 SV=3	Vim	34807848	11	7.54168	510	81.3397
PRPPPKPM	40S ribosomal protein S26 OS=Mus musculus OX=10090 GN=Rps26 PE=1 SV=3	Rps26	73209736	8	7.86457	1468	92.5599		KNLQTVNVDEN	60S ribosomal protein L31 OS=Mus musculus OX=10090 GN=Rpl31 PE=1 SV=1	Rpl31	34775460	11	7.54127	509	81.1802
IGPKNYEFL	Sorting nexin-14 OS=Mus musculus OX=10090 GN=Snx14 PE=1 SV=2	Snx14	73165416	9	7.86431	1467	92.4968		PPKVPPLG	Zinc finger protein 574 OS=Mus musculus OX=10090 GN=Znf574 PE=1 SV=1	Znf574	3.44076e+07	8	7.53665	508	81.0207
SALTNMVGSMF	Armadillo-like helical domain-containing protein 3 OS=Mus musculus OX=10090 GN=Armh3 PE=1 SV=2	Armh3	72750108	11	7.86183	1466	92.4338		KALMVYFH	EF-hand calcium-binding domain-containing protein 9 OS=Mus musculus OX=10090 GN=Efcab9 PE=1 SV=2	Efcab9	33874432	8	7.52987	507	80.8612
IGGIGTVPVGR	Elongation factor 1-alpha 1 OS=Mus musculus OX=10090 GN=Eef1a1 PE=1 SV=3	Eef1a1	72429248	11	7.85991	1465	92.3707		SETGAGKHVPR	Tubulin alpha-1B chain OS=Mus musculus OX=10090 GN=Tuba1b PE=1 SV=2	Tuba1b	33660880	11	7.52713	506	80.7018
ISPENHISL	Interferon-inducible double-stranded RNA-dependent protein kinase activator A OS=Mus musculus OX=10090 GN=Prkra PE=1 SV=1	Prkra	72334888	9	7.85935	1464	92.3077		VGVNGFGR	Glyceraldehyde-3-phosphate dehydrogenase OS=Mus musculus OX=10090 GN=Gapdh PE=1 SV=2	Gapdh	32599664	8	7.51321	505	80.5423
TLLRDRDEL	Endoplasmic reticulum resident protein 44 OS=Mus musculus OX=10090 GN=Erp44 PE=1 SV=1	Erp44	71517443	9	7.85441	1463	92.2446		GKLTGMAF	Glyceraldehyde-3-phosphate dehydrogenase OS=Mus musculus OX=10090 GN=Gapdh PE=1 SV=2	Gapdh	31609832	8	7.49982	504	80.3828
RIEVNVEL	Importin subunit alpha-1 OS=Mus musculus OX=10090 GN=Kpna2 PE=1 SV=2	Kpna2	70851328	8	7.85035	1462	92.1816		RAYRYLQL	Cytochrome c oxidase assembly protein COX14 OS=Mus musculus OX=10090 GN=Cox14 PE=3 SV=1	Cox14	31122509	8	7.49307	503	80.2233
VAFDFTKV	Phosphatidylinositol-binding clathrin assembly protein OS=Mus musculus OX=10090 GN=Picalm PE=1 SV=1	Picalm	69960448	8	7.84485	1461	92.1185		ERPTYTNL	Tubulin alpha-1B chain OS=Mus musculus OX=10090 GN=Tuba1b PE=1 SV=2	Tuba1b	31008054	8	7.49147	502	80.0638
KLIEVDDERKLR	40S ribosomal protein S6 OS=Mus musculus OX=10090 GN=Rps6 PE=1 SV=1	Rps6	69677028	12	7.84309	1460	92.0555		VGYRYETL	AMP deaminase 2 OS=Mus musculus OX=10090 GN=Ampd2 PE=1 SV=1	Ampd2	30778018	8	7.48824	501	79.9043
PAHILQEISGAY	Stearoyl-CoA desaturase 2 OS=Mus musculus OX=10090 GN=Scd2 PE=1 SV=2	Scd2	69584152	12	7.84251	1459	91.9924		RQYIFSKL	Interferon-induced very large GTPase 1 OS=Mus musculus OX=10090 GN=Gvin1 PE=1 SV=1	Gvin1	30658608	8	7.48655	500	79.7448
KLVFLGEQSV	Ras-related protein Rab-6A OS=Mus musculus OX=10090 GN=Rab6a PE=1 SV=4	Rab6a	69450240	10	7.84167	1458	91.9294		LVASPQMPII	Zinc finger protein 804A OS=Mus musculus OX=10090 GN=Znf804a PE=2 SV=1	Znf804a	30630222	10	7.48615	499	79.5853
GQLSNGDHHFM	YTH domain-containing family protein 1 OS=Mus musculus OX=10090 GN=Ythdf1 PE=1 SV=1	Ythdf1	69263508	11	7.8405	1457	91.8663		PRPPPKPM	40S ribosomal protein S26 OS=Mus musculus OX=10090 GN=Rps26 PE=1 SV=3	Rps26	30218722	8	7.48028	498	79.4258
VIVRFLTV	40S ribosomal protein S15a OS=Mus musculus OX=10090 GN=Rps15a PE=1 SV=2	Rps15a	68830384	8	7.83778	1456	91.8033		AIRVTNPNAR	60S ribosomal protein L32 OS=Mus musculus OX=10090 GN=Rpl32 PE=1 SV=2	Rpl32	30072994	10	7.47818	497	79.2663
DVNAAIATIK	Tubulin alpha-1A chain OS=Mus musculus OX=10090 GN=Tuba1a PE=1 SV=1;Tubulin alpha-1C chain OS=Mus musculus OX=10090 GN=Tuba1c PE=1 SV=1	Tuba1a	67093028	10	7.82668	1455	91.7402		SKYDFPKL	T-cell-specific guanine nucleotide triphosphate-binding protein 1 OS=Mus musculus OX=10090 GN=Tgtp1 PE=1 SV=1	Tgtp1	30036700	8	7.47765	496	79.1069
IIVLAKKMCMI	Catenin alpha-3 OS=Mus musculus OX=10090 GN=Ctnna3 PE=1 SV=2	Ctnna3	66729696	11	7.82432	1454	91.6772		SQLVKADEM	DnaJ homolog subfamily C member 3 OS=Mus musculus OX=10090 GN=Dnajc3 PE=1 SV=1	Dnajc3	29811046	9	7.47438	495	78.9474
RAYLFAHV	Pre-rRNA-processing protein TSR1 homolog OS=Mus musculus OX=10090 GN=Tsr1 PE=1 SV=1	Tsr1	66697292	8	7.82411	1453	91.6141		RSYDFEFM	Vacuolar protein sorting-associated protein 26A OS=Mus musculus OX=10090 GN=Vps26a PE=1 SV=1	Vps26a	29150594	8	7.46465	494	78.7879
EDPQTHSNRIY	Heat shock protein HSP 90-beta OS=Mus musculus OX=10090 GN=Hsp90ab1 PE=1 SV=3	Hsp90ab1	65968463	11	7.81934	1452	91.5511		DVQLQESGPG	Ig heavy chain V region MOPC 315 OS=Mus musculus OX=10090 PE=1 SV=2	?	29071814	10	7.46347	493	78.6284
GQLSNGDHHF	YTH domain-containing family protein 1 OS=Mus musculus OX=10090 GN=Ythdf1 PE=1 SV=1	Ythdf1	65696432	10	7.81754	1451	91.488		AAVIAHDFL	G1/S-specific cyclin-D3 OS=Mus musculus OX=10090 GN=Ccnd3 PE=1 SV=1	Ccnd3	28796470	9	7.45934	492	78.4689
AIRNMNTL	E3 ubiquitin-protein ligase synoviolin OS=Mus musculus OX=10090 GN=Syvn1 PE=1 SV=3	Syvn1	64042100	8	7.80647	1450	91.425		FVEQIRSQV	Small glutamine-rich tetratricopeptide repeat-containing protein alpha OS=Mus musculus OX=10090 GN=Sgta PE=1 SV=2	Sgta	28311058	9	7.45196	491	78.3094
GIQKELQF	L-lactate dehydrogenase A chain OS=Mus musculus OX=10090 GN=Ldha PE=1 SV=3	Ldha	64006344	8	7.80622	1449	91.3619		LEDPQTHSNRIY	Heat shock protein HSP 90-beta OS=Mus musculus OX=10090 GN=Hsp90ab1 PE=1 SV=3	Hsp90ab1	28116846	12	7.44897	490	78.1499
FHSGTPAASF	Ubiquitin-associated protein 2-like OS=Mus musculus OX=10090 GN=Ubap2l PE=1 SV=1	Ubap2l	63542768	10	7.80307	1448	91.2989		TGIKNGVHFL	Prolactin regulatory element-binding protein OS=Mus musculus OX=10090 GN=Preb PE=1 SV=1	Preb	27946825	10	7.44633	489	77.9904
KGPEGERPARF	40S ribosomal protein S10 OS=Mus musculus OX=10090 GN=Rps10 PE=1 SV=1	Rps10	63077096	11	7.79987	1447	91.2358		SGYIYHKL	Regulator of nonsense transcripts 1 OS=Mus musculus OX=10090 GN=Upf1 PE=1 SV=2	Upf1	27739252	8	7.44309	488	77.8309
AAPSNLPYL	Dual specificity protein phosphatase 4 OS=Mus musculus OX=10090 GN=Dusp4 PE=2 SV=1	Dusp4	63062100	9	7.79977	1446	91.1728		IGITNHDEY	Talin-1 OS=Mus musculus OX=10090 GN=Tln1 PE=1 SV=2	Tln1	27559824	9	7.44028	487	77.6715
AAITNKYQL	RNA polymerase I-specific transcription initiation factor RRN3 OS=Mus musculus OX=10090 GN=Rrn3 PE=1 SV=1	Rrn3	63017808	9	7.79946	1445	91.1097		RNFIFSRL	Lymphocyte-specific helicase OS=Mus musculus OX=10090 GN=Hells PE=1 SV=2	Hells	27432612	8	7.43827	486	77.512
AVGKVIPELNGK	Glyceraldehyde-3-phosphate dehydrogenase OS=Mus musculus OX=10090 GN=Gapdh PE=1 SV=2	Gapdh	62282240	12	7.79436	1444	91.0467		ATIINEEVL	Signal recognition particle 54 kDa protein OS=Mus musculus OX=10090 GN=Srp54 PE=1 SV=2	Srp54	26899458	9	7.42974	485	77.3525
RQLFHPEQLITG	Tubulin alpha-8 chain OS=Mus musculus OX=10090 GN=Tuba8 PE=1 SV=1;Tubulin alpha-1A chain OS=Mus musculus OX=10090 GN=Tuba1a PE=1 SV=1;Tubulin alpha-1C chain OS=Mus musculus OX=10090 GN=Tuba1c PE=1 SV=1	Tuba8	62023519	12	7.79256	1443	90.9836		TKAEMSHI	Transient receptor potential cation channel subfamily M member 7 OS=Mus musculus OX=10090 GN=Trpm7 PE=1 SV=1	Trpm7	26842790	8	7.42883	484	77.193
TRGEADRDTY	40S ribosomal protein S10 OS=Mus musculus OX=10090 GN=Rps10 PE=1 SV=1	Rps10	61543496	10	7.78918	1442	90.9206		TLIRPDGEKKAY	60S ribosomal protein L23a OS=Mus musculus OX=10090 GN=Rpl23a PE=1 SV=1	Rpl23a	26728459	12	7.42697	483	77.0335
AAPISPWTM	Zinc finger protein 746 OS=Mus musculus OX=10090 GN=Znf746 PE=1 SV=3	Znf746	60996912	9	7.78531	1441	90.8575		RVAEFTTNL	Myosin-9 OS=Mus musculus OX=10090 GN=Myh9 PE=1 SV=4	Myh9	26593544	9	7.42478	482	76.874
KVVKVANVSLL	40S ribosomal protein S23 OS=Mus musculus OX=10090 GN=Rps23 PE=1 SV=3	Rps23	60574024	11	7.78229	1440	90.7945		DVQIFNSSS	Mucin-19 OS=Mus musculus OX=10090 GN=Muc19 PE=2 SV=2	Muc19	26435610	9	7.42219	481	76.7145
VKVANVSLLAL	40S ribosomal protein S23 OS=Mus musculus OX=10090 GN=Rps23 PE=1 SV=3	Rps23	60275464	11	7.78014	1439	90.7314		ELNGKLTGMAF	Glyceraldehyde-3-phosphate dehydrogenase OS=Mus musculus OX=10090 GN=Gapdh PE=1 SV=2	Gapdh	25926762	11	7.41375	480	76.555
VRAVRPKVLM	60S ribosomal protein L34 OS=Mus musculus OX=10090 GN=Rpl34 PE=1 SV=2	Rpl34	60264125	10	7.78006	1438	90.6683		SLAQKKDRVAQ	60S ribosomal protein L5 OS=Mus musculus OX=10090 GN=Rpl5 PE=1 SV=3	Rpl5	25914906	11	7.41355	479	76.3955
TAQVIILNHP	Elongation factor 1-alpha 1 OS=Mus musculus OX=10090 GN=Eef1a1 PE=1 SV=3	Eef1a1	59512652	10	7.77461	1437	90.6053		GGVRNGVAL	Nucleolar protein 11 OS=Mus musculus OX=10090 GN=Nol11 PE=2 SV=1	Nol11	25764534	9	7.41102	478	76.236
SNRVVDLMA	Glyceraldehyde-3-phosphate dehydrogenase OS=Mus musculus OX=10090 GN=Gapdh PE=1 SV=2	Gapdh	59223432	9	7.77249	1436	90.5422		VNYRHLALL	DNA-directed RNA polymerase II subunit RPB1 OS=Mus musculus OX=10090 GN=Polr2a PE=1 SV=3	Polr2a	25516070	9	7.40681	477	76.0766
VAISPGKHYL	Protein mono-ADP-ribosyltransferase PARP14 OS=Mus musculus OX=10090 GN=Parp14 PE=1 SV=3	Parp14	58910104	10	7.77019	1435	90.4792		RTIGISVDPRR	60S ribosomal protein L13 OS=Mus musculus OX=10090 GN=Rpl13 PE=1 SV=3	Rpl13	25470612	11	7.40604	476	75.9171
VIPELNGKLTG	Glyceraldehyde-3-phosphate dehydrogenase OS=Mus musculus OX=10090 GN=Gapdh PE=1 SV=2	Gapdh	57697076	11	7.76115	1434	90.4161		KLEDGPKFLK	Elongation factor 1-alpha 1 OS=Mus musculus OX=10090 GN=Eef1a1 PE=1 SV=3	Eef1a1	25438278	10	7.40549	475	75.7576
RVPTPNVSVVDL	Glyceraldehyde-3-phosphate dehydrogenase OS=Mus musculus OX=10090 GN=Gapdh PE=1 SV=2	Gapdh	57329676	12	7.75838	1433	90.3531		VLDKLKAERER	Elongation factor 1-alpha 1 OS=Mus musculus OX=10090 GN=Eef1a1 PE=1 SV=3	Eef1a1	25058150	11	7.39895	474	75.5981
LSKEDDVRQY	40S ribosomal protein S6 OS=Mus musculus OX=10090 GN=Rps6 PE=1 SV=1	Rps6	57110562	10	7.75672	1432	90.29		DVNAAIATIK	Tubulin alpha-1B chain OS=Mus musculus OX=10090 GN=Tuba1b PE=1 SV=2	Tuba1b	25015228	10	7.3982	473	75.4386
KVVPEMTEILK	Electron transfer flavoprotein subunit alpha, mitochondrial OS=Mus musculus OX=10090 GN=Etfa PE=1 SV=2	Etfa	57095996	11	7.75661	1431	90.227		KATKYLKDVTLK	60S ribosomal protein L17 OS=Mus musculus OX=10090 GN=Rpl17 PE=1 SV=3	Rpl17	24851801	12	7.39536	472	75.2791
SKYDFPKL	T-cell-specific guanine nucleotide triphosphate-binding protein 1 OS=Mus musculus OX=10090 GN=Tgtp1 PE=1 SV=1	Tgtp1	56926428	8	7.75531	1430	90.1639		KVVKVANVSLL	40S ribosomal protein S23 OS=Mus musculus OX=10090 GN=Rps23 PE=1 SV=3	Rps23	24844985	11	7.39524	471	75.1196
TGIKNGVHFL	Prolactin regulatory element-binding protein OS=Mus musculus OX=10090 GN=Preb PE=1 SV=1	Preb	56766827	10	7.75409	1429	90.1009		STRVTAEVTT	Uncharacterized protein C11orf24 homolog OS=Mus musculus OX=10090 PE=2 SV=1	?	24623220	10	7.39134	470	74.9601
GAVKNLTYF	CMP-N-acetylneuraminate-beta-galactosamide-alpha-2,3-sialyltransferase 4 OS=Mus musculus OX=10090 GN=St3gal4 PE=1 SV=1	St3gal4	56749332	9	7.75396	1428	90.0378		GEYGFQNAILVR	Albumin OS=Mus musculus OX=10090 GN=Alb PE=1 SV=3	Alb	24562418	12	7.39027	469	74.8006
AIRVTNPNAR	60S ribosomal protein L32 OS=Mus musculus OX=10090 GN=Rpl32 PE=1 SV=2	Rpl32	55674708	10	7.74566	1427	89.9748		KKDWYDVKAP	40S ribosomal protein S3a OS=Mus musculus OX=10090 GN=Rps3a PE=1 SV=3	Rps3a	24209534	10	7.38399	468	74.6411
SSVPGVRLL	Vimentin OS=Mus musculus OX=10090 GN=Vim PE=1 SV=3	Vim	55496620	9	7.74427	1426	89.9117		ASLVNADKL	Vacuolar protein sorting-associated protein 33B OS=Mus musculus OX=10090 GN=Vps33b PE=1 SV=1	Vps33b	24073990	9	7.38155	467	74.4817
TVAVGVIK	Elongation factor 1-alpha 1 OS=Mus musculus OX=10090 GN=Eef1a1 PE=1 SV=3	Eef1a1	55031420	8	7.74061	1425	89.8487		TEDVPRKLL	60S ribosomal protein L6 OS=Mus musculus OX=10090 GN=Rpl6 PE=1 SV=3	Rpl6	2.3961e+07	9	7.37951	466	74.3222
KFIDTTSKF	60S ribosomal protein L3 OS=Mus musculus OX=10090 GN=Rpl3 PE=1 SV=3	Rpl3	55010504	9	7.74045	1424	89.7856		VQLENQMVL	Copper chaperone for superoxide dismutase OS=Mus musculus OX=10090 GN=Ccs PE=1 SV=1	Ccs	23935105	9	7.37904	465	74.1627
VILSFRSL	Nck-associated protein 1 OS=Mus musculus OX=10090 GN=Nckap1 PE=1 SV=2	Nckap1	54928568	8	7.7398	1423	89.7226		SAFSFRTL	F-box only protein 38 OS=Mus musculus OX=10090 GN=Fbxo38 PE=1 SV=1	Fbxo38	23811260	8	7.37678	464	74.0032
NEATGGKYVPR	Tubulin beta-5 chain OS=Mus musculus OX=10090 GN=Tubb5 PE=1 SV=1;Tubulin beta-4B chain OS=Mus musculus OX=10090 GN=Tubb4b PE=1 SV=1	Tubb5	54637088	11	7.73749	1422	89.6595		VGPRYTQL	Mitogen-activated protein kinase 3 OS=Mus musculus OX=10090 GN=Mapk3 PE=1 SV=5	Mapk3	23600114	8	7.37291	463	73.8437
HAIENIDTF	Breast cancer type 2 susceptibility protein homolog OS=Mus musculus OX=10090 GN=Brca2 PE=1 SV=2	Brca2	54555976	9	7.73684	1421	89.5965		ESILGGVLK	Dedicator of cytokinesis protein 7 OS=Mus musculus OX=10090 GN=Dock7 PE=1 SV=3	Dock7	23538326	9	7.37178	462	73.6842
LHFNQIETL	Peroxidasin homolog OS=Mus musculus OX=10090 GN=Pxdn PE=1 SV=2	Pxdn	54401672	9	7.73561	1420	89.5334		IPGKDPDSP	Transmembrane glycoprotein NMB OS=Mus musculus OX=10090 GN=Gpnmb PE=1 SV=2	Gpnmb	23459664	9	7.37032	461	73.5247
ATLVFHNL	Signal transducer and activator of transcription 3 OS=Mus musculus OX=10090 GN=Stat3 PE=1 SV=2	Stat3	53913316	8	7.7317	1419	89.4704		ISGVNGTHI	SRSF protein kinase 1 OS=Mus musculus OX=10090 GN=Srpk1 PE=1 SV=2	Srpk1	23449282	9	7.37013	460	73.3652
SSYTFPKM	Enoyl-CoA delta isomerase 2 OS=Mus musculus OX=10090 GN=Eci2 PE=1 SV=2	Eci2	53630128	8	7.72941	1418	89.4073		HGYTFANL	SUMO-activating enzyme subunit 1 OS=Mus musculus OX=10090 GN=Sae1 PE=1 SV=1	Sae1	23375354	8	7.36876	459	73.2057
DAGAGIALNDN	Glyceraldehyde-3-phosphate dehydrogenase OS=Mus musculus OX=10090 GN=Gapdh PE=1 SV=2	Gapdh	53496260	11	7.72832	1417	89.3443		LAIRNDEEL	Histone H2A type 1-B OS=Mus musculus OX=10090 GN=H2ac4 PE=1 SV=1	H2ac4	23249774	9	7.36642	458	73.0463
NGPQNIYNL	Ribonuclease kappa OS=Mus musculus OX=10090 GN=Rnasek PE=3 SV=1	Rnasek	53099500	9	7.72509	1416	89.2812		SGKKLEDGPK	Elongation factor 1-alpha 1 OS=Mus musculus OX=10090 GN=Eef1a1 PE=1 SV=3	Eef1a1	23114526	10	7.36388	457	72.8868
VVDPFSKKDW	40S ribosomal protein S3a OS=Mus musculus OX=10090 GN=Rps3a PE=1 SV=3	Rps3a	53063168	10	7.72479	1415	89.2182		ALIQNADTL	SH3 domain-binding protein 1 OS=Mus musculus OX=10090 GN=Sh3bp1 PE=1 SV=3	Sh3bp1	22765660	9	7.35728	456	72.7273
STVRNADVI	ATP-dependent translocase ABCB1 OS=Mus musculus OX=10090 GN=Abcb1b PE=1 SV=1	Abcb1b	52981096	9	7.72412	1414	89.1551		TAVVNVTYM	Insulin-like growth factor 2 mRNA-binding protein 2 OS=Mus musculus OX=10090 GN=Igf2bp2 PE=1 SV=1	Igf2bp2	22517016	9	7.35251	455	72.5678
LEKPAKYDDIKK	Glyceraldehyde-3-phosphate dehydrogenase OS=Mus musculus OX=10090 GN=Gapdh PE=1 SV=2	Gapdh	52787654	12	7.72253	1413	89.0921		LAPKIEDEEAS	Proliferating cell nuclear antigen OS=Mus musculus OX=10090 GN=Pcna PE=1 SV=2	Pcna	22390810	11	7.35007	454	72.4083
GGVRNGVAL	Nucleolar protein 11 OS=Mus musculus OX=10090 GN=Nol11 PE=2 SV=1	Nol11	52768936	9	7.72238	1412	89.029		KLVFLGEQSV	Ras-related protein Rab-6A OS=Mus musculus OX=10090 GN=Rab6a PE=1 SV=4	Rab6a	22388664	10	7.35003	453	72.2488
IYDKDPEGTVQP	Cysteine-rich protein 2 OS=Mus musculus OX=10090 GN=Crip2 PE=1 SV=1	Crip2	52224580	12	7.71787	1411	88.966		AREIFDSRGNP	Alpha-enolase OS=Mus musculus OX=10090 GN=Eno1 PE=1 SV=3	Eno1	22364131	11	7.34955	452	72.0893
ASLLEEADY	Titin OS=Mus musculus OX=10090 GN=Ttn PE=1 SV=1	Ttn	52194492	9	7.71762	1410	88.9029		GSLKNVTTL	Erbin OS=Mus musculus OX=10090 GN=Erbin PE=1 SV=3	Erbin	22302052	9	7.34834	451	71.9298
SQYVFTEM	Transmembrane protein 199 OS=Mus musculus OX=10090 GN=Tmem199 PE=1 SV=1	Tmem199	52122924	8	7.71703	1409	88.8398		VGFDYKERL	Src substrate cortactin OS=Mus musculus OX=10090 GN=Cttn PE=1 SV=2	Cttn	22263862	9	7.3476	450	71.7703
SFSDYPPL	Elongation factor 1-alpha 1 OS=Mus musculus OX=10090 GN=Eef1a1 PE=1 SV=3	Eef1a1	52051172	8	7.71643	1408	88.7768		YIVEDTWAEV	Myosin-IIIa OS=Mus musculus OX=10090 GN=Myo3a PE=1 SV=1	Myo3a	21795543	10	7.33837	449	71.6108
GALKNLSVI	E3 ISG15--protein ligase Herc6 OS=Mus musculus OX=10090 GN=Herc6 PE=2 SV=1	Herc6	51960220	9	7.71567	1407	88.7137		AAPQNFTPSMI	AP-3 complex subunit beta-1 OS=Mus musculus OX=10090 GN=Ap3b1 PE=1 SV=2	Ap3b1	21679654	11	7.33605	448	71.4514
SLKGVDPKFL	60S ribosomal protein L29 OS=Mus musculus OX=10090 GN=Rpl29 PE=1 SV=2	Rpl29	51943932	10	7.71553	1406	88.6507		QVVQFNRL	Ragulator complex protein LAMTOR3 OS=Mus musculus OX=10090 GN=Lamtor3 PE=1 SV=1	Lamtor3	21677060	8	7.336	447	71.2919
RIYRMIKL	Heat shock protein HSP 90-alpha OS=Mus musculus OX=10090 GN=Hsp90aa1 PE=1 SV=4;Heat shock protein HSP 90-beta OS=Mus musculus OX=10090 GN=Hsp90ab1 PE=1 SV=3	Hsp90aa1	51744216	8	7.71386	1405	88.5876		ISGVNRYYV	NADH dehydrogenase [ubiquinone] 1 alpha subcomplex subunit 1 OS=Mus musculus OX=10090 GN=Ndufa1 PE=1 SV=1	Ndufa1	21534910	9	7.33314	446	71.1324
LISKIREEYPD	Tubulin beta-5 chain OS=Mus musculus OX=10090 GN=Tubb5 PE=1 SV=1;Tubulin beta-4B chain OS=Mus musculus OX=10090 GN=Tubb4b PE=1 SV=1;Tubulin beta-6 chain OS=Mus musculus OX=10090 GN=Tubb6 PE=1 SV=1	Tubb5	51352430	11	7.71056	1404	88.5246		AMAPRTLLL	H-2 class I histocompatibility antigen, D-D alpha chain OS=Mus musculus OX=10090 GN=H2-D1 PE=1 SV=1;H-2 class I histocompatibility antigen, D-B alpha chain OS=Mus musculus OX=10090 GN=H2-D1 PE=1 SV=2	H2-D1	21490044	9	7.33224	445	70.9729
VKVANVSLL	40S ribosomal protein S23 OS=Mus musculus OX=10090 GN=Rps23 PE=1 SV=3	Rps23	51166384	9	7.70898	1403	88.4615		ASPEFTKL	Protein FAM98A OS=Mus musculus OX=10090 GN=Fam98a PE=1 SV=1	Fam98a	21489670	8	7.33223	444	70.8134
QPHVNGGP	Abl interactor 1 OS=Mus musculus OX=10090 GN=Abi1 PE=1 SV=3	Abi1	51143912	8	7.70879	1402	88.3985		QASEGPLKGILG	Glyceraldehyde-3-phosphate dehydrogenase OS=Mus musculus OX=10090 GN=Gapdh PE=1 SV=2	Gapdh	21081698	12	7.32391	443	70.6539
TKKVGIVGKY	60S ribosomal protein L37a OS=Mus musculus OX=10090 GN=Rpl37a PE=1 SV=2	Rpl37a	50921980	10	7.70691	1401	88.3354		RIYGFTAV	E3 ubiquitin-protein ligase HECTD1 OS=Mus musculus OX=10090 GN=Hectd1 PE=1 SV=2	Hectd1	21019348	8	7.32262	442	70.4944
STRVTAEVTT	Uncharacterized protein C11orf24 homolog OS=Mus musculus OX=10090 PE=2 SV=1	?	50911724	10	7.70682	1400	88.2724		SAMVFSAM	V-type proton ATPase 16 kDa proteolipid subunit OS=Mus musculus OX=10090 GN=Atp6v0c PE=1 SV=1	Atp6v0c	21015724	8	7.32254	441	70.3349
SLEDPQTHS	Heat shock protein HSP 90-beta OS=Mus musculus OX=10090 GN=Hsp90ab1 PE=1 SV=3	Hsp90ab1	50911608	9	7.70682	1399	88.2093		HFISDGVKKTL	Complement C3 OS=Mus musculus OX=10090 GN=C3 PE=1 SV=3	C3	21004144	11	7.3223	440	70.1754
SGLKYVNV	Adenylate kinase isoenzyme 6 OS=Mus musculus OX=10090 GN=Ak6 PE=1 SV=1	Ak6	50558564	8	7.70379	1398	88.1463		VAYGFRNI	Cytosolic iron-sulfur assembly component 3 OS=Mus musculus OX=10090 GN=Ciao3 PE=1 SV=2	Ciao3	20753950	8	7.3171	439	70.0159
FMPGFAPL	Tubulin beta-3 chain OS=Mus musculus OX=10090 GN=Tubb3 PE=1 SV=1;Tubulin beta-5 chain OS=Mus musculus OX=10090 GN=Tubb5 PE=1 SV=1;Tubulin beta-4B chain OS=Mus musculus OX=10090 GN=Tubb4b PE=1 SV=1;Tubulin beta-6 chain OS=Mus musculus OX=10090 GN=Tubb6 PE=1 SV=1	Tubb3	49871684	8	7.69785	1397	88.0832		AQLAKKDYL	Neutrophil cytosol factor 2 OS=Mus musculus OX=10090 GN=Ncf2 PE=1 SV=1	Ncf2	20631936	9	7.31454	438	69.8565
KADGIVSKNF	40S ribosomal protein S21 OS=Mus musculus OX=10090 GN=Rps21 PE=1 SV=1	Rps21	4.94669e+07	10	7.69431	1396	88.0202		SIGDGIARVH	ATP synthase subunit alpha, mitochondrial OS=Mus musculus OX=10090 GN=Atp5f1a PE=1 SV=1	Atp5f1a	20613088	10	7.31414	437	69.697
RYDGMVGF	Heterogeneous nuclear ribonucleoprotein K OS=Mus musculus OX=10090 GN=Hnrnpk PE=1 SV=1	Hnrnpk	49428876	8	7.69398	1395	87.9571		TAYEFAKL	Estradiol 17-beta-dehydrogenase 11 OS=Mus musculus OX=10090 GN=Hsd17b11 PE=1 SV=1	Hsd17b11	20589418	8	7.31364	436	69.5375
FSHEGPAFL	5,6-dihydroxyindole-2-carboxylic acid oxidase OS=Mus musculus OX=10090 GN=Tyrp1 PE=1 SV=1	Tyrp1	49266532	9	7.69255	1394	87.8941		SFLPLSSSM	Vomeronasal type-1 receptor 52 OS=Mus musculus OX=10090 GN=Vmn1r52 PE=3 SV=1	Vmn1r52	20497142	9	7.31169	435	69.378
NRDITGELE	PITH domain-containing protein 1 OS=Mus musculus OX=10090 GN=Pithd1 PE=1 SV=1	Pithd1	49210772	9	7.69206	1393	87.831		IQLMNTAHL	Peroxisomal carnitine O-octanoyltransferase OS=Mus musculus OX=10090 GN=Crot PE=1 SV=1	Crot	20415352	9	7.30996	434	69.2185
TVDGPSGKLWR	Glyceraldehyde-3-phosphate dehydrogenase OS=Mus musculus OX=10090 GN=Gapdh PE=1 SV=2	Gapdh	49104734	11	7.69112	1392	87.768		YMPQNPHII	Histone-binding protein RBBP7 OS=Mus musculus OX=10090 GN=Rbbp7 PE=1 SV=1	Rbbp7	19919736	9	7.29928	433	69.059
SAVENILEHL	28S ribosomal protein S6, mitochondrial OS=Mus musculus OX=10090 GN=Mrps6 PE=1 SV=3	Mrps6	48818852	10	7.68859	1391	87.7049		ASVINGHTL	Serine/threonine-protein phosphatase 6 regulatory ankyrin repeat subunit B OS=Mus musculus OX=10090 GN=Ankrd44 PE=1 SV=1	Ankrd44	19827894	9	7.29728	432	68.8995
GVDARGIAKV	Protein kinase C epsilon type OS=Mus musculus OX=10090 GN=Prkce PE=1 SV=1	Prkce	48783028	10	7.68827	1390	87.6419		SALTNMVGSMF	Armadillo-like helical domain-containing protein 3 OS=Mus musculus OX=10090 GN=Armh3 PE=1 SV=2	Armh3	19806372	11	7.2968	431	68.74
FIDGHTKILT	Oogenesin-2 OS=Mus musculus OX=10090 GN=Oog2 PE=2 SV=1	Oog2	48718660	10	7.6877	1389	87.5788		HAIENIDTF	Breast cancer type 2 susceptibility protein homolog OS=Mus musculus OX=10090 GN=Brca2 PE=1 SV=2	Brca2	19794978	9	7.29656	430	68.5805
VGVNNPVFL	Lon protease homolog 2, peroxisomal OS=Mus musculus OX=10090 GN=Lonp2 PE=1 SV=1	Lonp2	48644164	9	7.68703	1388	87.5158		FHSGTPAASF	Ubiquitin-associated protein 2-like OS=Mus musculus OX=10090 GN=Ubap2l PE=1 SV=1	Ubap2l	19502362	10	7.29009	429	68.4211
SLEELRVAGIH	60S ribosomal protein L13 OS=Mus musculus OX=10090 GN=Rpl13 PE=1 SV=3	Rpl13	4.84228e+07	11	7.68505	1387	87.4527		SVVRYVQL	U6 snRNA-associated Sm-like protein LSm2 OS=Mus musculus OX=10090 GN=Lsm2 PE=1 SV=1	Lsm2	19500692	8	7.29005	428	68.2616
KAFTYINL	Transferrin receptor protein 1 OS=Mus musculus OX=10090 GN=Tfrc PE=1 SV=1	Tfrc	48128852	8	7.68241	1386	87.3897		SGRYELGSI	Solute carrier organic anion transporter family member 4C1 OS=Mus musculus OX=10090 GN=Slco4c1 PE=1 SV=1	Slco4c1	19475440	9	7.28949	427	68.1021
RSYDFEFM	Vacuolar protein sorting-associated protein 26A OS=Mus musculus OX=10090 GN=Vps26a PE=1 SV=1	Vps26a	47905624	8	7.68039	1385	87.3266		VVYIYHSL	Ribosomal oxygenase 2 OS=Mus musculus OX=10090 GN=Riox2 PE=1 SV=2	Riox2	19325156	8	7.28612	426	67.9426
FGLGAEQRPPAA	Activity-dependent neuroprotector homeobox protein OS=Mus musculus OX=10090 GN=Adnp PE=1 SV=2	Adnp	47686452	12	7.6784	1384	87.2636		AMNVNEIFM	Ras-related protein Rab-5C OS=Mus musculus OX=10090 GN=Rab5c PE=1 SV=2	Rab5c	19237185	9	7.28414	425	67.7831
FSETGAGKHVPR	Tubulin alpha-1A chain OS=Mus musculus OX=10090 GN=Tuba1a PE=1 SV=1;Tubulin alpha-1C chain OS=Mus musculus OX=10090 GN=Tuba1c PE=1 SV=1	Tuba1a	47361580	12	7.67543	1383	87.2005		FSGSNTLHL	Apolipoprotein B-100 OS=Mus musculus OX=10090 GN=Apob PE=1 SV=1	Apob	19176286	9	7.28276	424	67.6236
SQLVKADEM	DnaJ homolog subfamily C member 3 OS=Mus musculus OX=10090 GN=Dnajc3 PE=1 SV=1	Dnajc3	46926004	9	7.67141	1382	87.1375		ASGLTCTKAL	SCO-spondin OS=Mus musculus OX=10090 GN=Sspo PE=2 SV=2	Sspo	19112760	10	7.28132	423	67.4641
TNLIYQQV	Unconventional myosin-VIIa OS=Mus musculus OX=10090 GN=Myo7a PE=1 SV=2	Myo7a	46806944	8	7.67031	1381	87.0744		AALENTHLL	Cytosolic iron-sulfur assembly component 2B OS=Mus musculus OX=10090 GN=Ciao2b PE=1 SV=1	Ciao2b	19078178	9	7.28054	422	67.3046
ALFRQVTTP	Autophagy-related protein 2 homolog A OS=Mus musculus OX=10090 GN=Atg2a PE=1 SV=2	Atg2a	46570708	9	7.66811	1380	87.0113		SRPETGRP	40S ribosomal protein S10 OS=Mus musculus OX=10090 GN=Rps10 PE=1 SV=1	Rps10	18958408	8	7.2778	421	67.1451
SSFSRVTNF	TBC1 domain family member 17 OS=Mus musculus OX=10090 GN=Tbc1d17 PE=1 SV=2	Tbc1d17	46485340	9	7.66732	1379	86.9483		YNEATGGKYVPR	Tubulin beta-5 chain OS=Mus musculus OX=10090 GN=Tubb5 PE=1 SV=1;Tubulin beta-4B chain OS=Mus musculus OX=10090 GN=Tubb4b PE=1 SV=1	Tubb5	18956369	12	7.27776	420	66.9856
AAPIDRVGQTIE	Heterogeneous nuclear ribonucleoprotein M OS=Mus musculus OX=10090 GN=Hnrnpm PE=1 SV=3	Hnrnpm	46375376	12	7.66629	1378	86.8852		SSLAVADSDH	ATP-dependent RNA helicase DHX29 OS=Mus musculus OX=10090 GN=Dhx29 PE=1 SV=1	Dhx29	18956046	10	7.27775	419	66.8262
IREEYPDR	Tubulin beta-5 chain OS=Mus musculus OX=10090 GN=Tubb5 PE=1 SV=1;Tubulin beta-4B chain OS=Mus musculus OX=10090 GN=Tubb4b PE=1 SV=1;Tubulin beta-6 chain OS=Mus musculus OX=10090 GN=Tubb6 PE=1 SV=1	Tubb5	46278244	8	7.66538	1377	86.8222		AKLVNQEVL	NADH-ubiquinone oxidoreductase 75 kDa subunit, mitochondrial OS=Mus musculus OX=10090 GN=Ndufs1 PE=1 SV=2	Ndufs1	18910494	9	7.2767	418	66.6667
LAIRNDEEL	Histone H2AX OS=Mus musculus OX=10090 GN=H2ax PE=1 SV=2	H2ax	45900092	9	7.66181	1376	86.7591		TNQDFIQRL	Nischarin OS=Mus musculus OX=10090 GN=Nisch PE=1 SV=2	Nisch	18619738	9	7.26997	417	66.5072
TKGGPDFSNLEK	NudC domain-containing protein 2 OS=Mus musculus OX=10090 GN=Nudcd2 PE=1 SV=1	Nudcd2	4.51553e+07	12	7.65471	1375	86.6961		GALKNLSVI	E3 ISG15--protein ligase Herc6 OS=Mus musculus OX=10090 GN=Herc6 PE=2 SV=1	Herc6	18574258	9	7.26891	416	66.3477
KVIPELNGKLTG	Glyceraldehyde-3-phosphate dehydrogenase OS=Mus musculus OX=10090 GN=Gapdh PE=1 SV=2	Gapdh	45072377	12	7.65391	1374	86.633		KVIPELNGKLTG	Glyceraldehyde-3-phosphate dehydrogenase OS=Mus musculus OX=10090 GN=Gapdh PE=1 SV=2	Gapdh	18515935	12	7.26755	415	66.1882
DHPIVETLR	Heat shock protein HSP 90-beta OS=Mus musculus OX=10090 GN=Hsp90ab1 PE=1 SV=3	Hsp90ab1	4.50439e+07	9	7.65364	1373	86.57		SSIQNGKYTL	Lysine-specific demethylase 7A OS=Mus musculus OX=10090 GN=Kdm7a PE=2 SV=2	Kdm7a	18515074	10	7.26753	414	66.0287
SSVPGVRLLQ	Vimentin OS=Mus musculus OX=10090 GN=Vim PE=1 SV=3	Vim	44896996	10	7.65222	1372	86.5069		TVAVGVIK	Elongation factor 1-alpha 1 OS=Mus musculus OX=10090 GN=Eef1a1 PE=1 SV=3	Eef1a1	18351190	8	7.26366	413	65.8692
SLGSALRPSTS	Vimentin OS=Mus musculus OX=10090 GN=Vim PE=1 SV=3	Vim	44796536	11	7.65124	1371	86.4439		SQVINPTAI	Host cell factor 1 OS=Mus musculus OX=10090 GN=Hcfc1 PE=1 SV=2	Hcfc1	18144238	9	7.25874	412	65.7097
KVGINYQPP	Tubulin alpha-8 chain OS=Mus musculus OX=10090 GN=Tuba8 PE=1 SV=1;Tubulin alpha chain-like 3 OS=Mus musculus OX=10090 GN=Tubal3 PE=2 SV=2;Tubulin alpha-1A chain OS=Mus musculus OX=10090 GN=Tuba1a PE=1 SV=1;Tubulin alpha-1C chain OS=Mus musculus OX=10090 GN=Tuba1c PE=1 SV=1	Tuba8	44395692	9	7.64734	1370	86.3808		SLKGVDPKFL	60S ribosomal protein L29 OS=Mus musculus OX=10090 GN=Rpl29 PE=1 SV=2	Rpl29	18132874	10	7.25847	411	65.5502
FSGSNTLHL	Apolipoprotein B-100 OS=Mus musculus OX=10090 GN=Apob PE=1 SV=1	Apob	44229900	9	7.64572	1369	86.3178		AAGAGKVTK	Elongation factor 1-alpha 1 OS=Mus musculus OX=10090 GN=Eef1a1 PE=1 SV=3	Eef1a1	18107096	9	7.25785	410	65.3907
VGAAKHGVSRT	Chromodomain-helicase-DNA-binding protein 7 OS=Mus musculus OX=10090 GN=Chd7 PE=1 SV=1	Chd7	43638964	11	7.63987	1368	86.2547		KAFTYINL	Transferrin receptor protein 1 OS=Mus musculus OX=10090 GN=Tfrc PE=1 SV=1	Tfrc	18069664	8	7.25695	409	65.2313
LEGLEGSSAAEI	Pleckstrin homology domain-containing family G member 2 OS=Mus musculus OX=10090 GN=Plekhg2 PE=2 SV=2	Plekhg2	43399508	12	7.63748	1367	86.1917		IAMEFNHL	Prostaglandin G/H synthase 1 OS=Mus musculus OX=10090 GN=Ptgs1 PE=1 SV=1	Ptgs1	1.80685e+07	8	7.25692	408	65.0718
SDYPPLGR	Elongation factor 1-alpha 1 OS=Mus musculus OX=10090 GN=Eef1a1 PE=1 SV=3	Eef1a1	43236688	8	7.63585	1366	86.1286		LQYEFTKL	Formin-like protein 2 OS=Mus musculus OX=10090 GN=Fmnl2 PE=1 SV=2	Fmnl2	17947022	8	7.25399	407	64.9123
RSIKNVTEL	Replication termination factor 2 OS=Mus musculus OX=10090 GN=Rtf2 PE=1 SV=1	Rtf2	43232215	9	7.63581	1365	86.0656		TISSTGPNGAII	Xaa-Pro aminopeptidase 1 OS=Mus musculus OX=10090 GN=Xpnpep1 PE=1 SV=1	Xpnpep1	17716962	12	7.24839	406	64.7528
SALQNAESDRL	Centromere-associated protein E OS=Mus musculus OX=10090 GN=Cenpe PE=1 SV=1	Cenpe	43152736	11	7.63501	1364	86.0025		GLQFPVGRIH	Histone H2A.Z OS=Mus musculus OX=10090 GN=H2az1 PE=1 SV=2	H2az1	17635156	10	7.24638	405	64.5933
KRLTKGGKKGA	40S ribosomal protein S3a OS=Mus musculus OX=10090 GN=Rps3a PE=1 SV=3	Rps3a	43075580	11	7.63423	1363	85.9395		ISFKFDHL	F-actin-capping protein subunit alpha-1 OS=Mus musculus OX=10090 GN=Capza1 PE=1 SV=4	Capza1	17616276	8	7.24591	404	64.4338
SNYGPMKGGSF	Heterogeneous nuclear ribonucleoprotein A3 OS=Mus musculus OX=10090 GN=Hnrnpa3 PE=1 SV=1	Hnrnpa3	42904684	11	7.6325	1362	85.8764		QTVENVEHL	TELO2-interacting protein 1 homolog OS=Mus musculus OX=10090 GN=Tti1 PE=1 SV=2	Tti1	17573404	9	7.24486	403	64.2743
IGIVKQAGLDR	Heterogeneous nuclear ribonucleoprotein F OS=Mus musculus OX=10090 GN=Hnrnpf PE=1 SV=3	Hnrnpf	4.2765e+07	11	7.63109	1361	85.8134		RSLKFYSL	Pre-mRNA-processing factor 19 OS=Mus musculus OX=10090 GN=Prpf19 PE=1 SV=1	Prpf19	17277914	8	7.23749	402	64.1148
KTVVNKDVF	60S ribosomal protein L27 OS=Mus musculus OX=10090 GN=Rpl27 PE=1 SV=2	Rpl27	42568784	9	7.62909	1360	85.7503		REEYPDRIM	Tubulin beta-5 chain OS=Mus musculus OX=10090 GN=Tubb5 PE=1 SV=1;Tubulin beta-4B chain OS=Mus musculus OX=10090 GN=Tubb4b PE=1 SV=1	Tubb5	1.7175e+07	9	7.2349	401	63.9553
IRMLGDVR	High affinity cAMP-specific 3',5'-cyclic phosphodiesterase 7A OS=Mus musculus OX=10090 GN=Pde7a PE=2 SV=2	Pde7a	42301964	8	7.62636	1359	85.6873		GALKNTDYF	Cytosolic 5'-nucleotidase 3A OS=Mus musculus OX=10090 GN=Nt5c3a PE=1 SV=4	Nt5c3a	17165138	9	7.23465	400	63.7959
SGKKLEDGPK	Elongation factor 1-alpha 1 OS=Mus musculus OX=10090 GN=Eef1a1 PE=1 SV=3	Eef1a1	42268860	10	7.62602	1358	85.6242		QPHVNGGP	Abl interactor 1 OS=Mus musculus OX=10090 GN=Abi1 PE=1 SV=3	Abi1	17060814	8	7.232	399	63.6364
EHKTSFSI	Zinc finger and BTB domain-containing protein 5 OS=Mus musculus OX=10090 GN=Zbtb5 PE=2 SV=1	Zbtb5	42218924	8	7.62551	1357	85.5612		KGVFNVEVV	Dedicator of cytokinesis protein 7 OS=Mus musculus OX=10090 GN=Dock7 PE=1 SV=3	Dock7	16841700	9	7.22639	398	63.4769
RLEKPAKY	Glyceraldehyde-3-phosphate dehydrogenase OS=Mus musculus OX=10090 GN=Gapdh PE=1 SV=2	Gapdh	42052064	8	7.62379	1356	85.4981		KEYMVTIR	Docking protein 2 OS=Mus musculus OX=10090 GN=Dok2 PE=1 SV=1	Dok2	16841186	8	7.22637	397	63.3174
ASPEFTKL	Protein FAM98A OS=Mus musculus OX=10090 GN=Fam98a PE=1 SV=1	Fam98a	41578388	8	7.61887	1355	85.4351		STVRNADVI	ATP-dependent translocase ABCB1 OS=Mus musculus OX=10090 GN=Abcb1b PE=1 SV=1	Abcb1b	16828136	9	7.22604	396	63.1579
EALELRDNDKTR	Alpha-enolase OS=Mus musculus OX=10090 GN=Eno1 PE=1 SV=3	Eno1	4.10594e+07	12	7.61341	1354	85.372		ATRSFPQL	Annexin A7 OS=Mus musculus OX=10090 GN=Anxa7 PE=1 SV=2	Anxa7	16690782	8	7.22248	395	62.9984
VGIRNTFLL	Poly(A) RNA polymerase GLD2 OS=Mus musculus OX=10090 GN=Tent2 PE=1 SV=1	Tent2	41056856	9	7.61339	1353	85.309		SSVPGVRLLQ	Vimentin OS=Mus musculus OX=10090 GN=Vim PE=1 SV=3	Vim	16645209	10	7.22129	394	62.8389
KSLLNSKDIM	Thiosulfate sulfurtransferase/rhodanese-like domain-containing protein 3 OS=Mus musculus OX=10090 GN=Tstd3 PE=1 SV=1	Tstd3	40820656	10	7.61088	1352	85.2459		LQYEFTHL	Formin-like protein 1 OS=Mus musculus OX=10090 GN=Fmnl1 PE=1 SV=1	Fmnl1	16595147	8	7.21998	393	62.6794
QIIPFKTL	Ribosomal L1 domain-containing protein 1 OS=Mus musculus OX=10090 GN=Rsl1d1 PE=1 SV=1	Rsl1d1	40650880	8	7.60907	1351	85.1828		SVVAFHNL	Probable C-mannosyltransferase DPY19L3 OS=Mus musculus OX=10090 GN=Dpy19l3 PE=2 SV=2	Dpy19l3	16240385	8	7.2106	392	62.5199
MGEVGLSWNFGP	Kinesin-like protein KIF7 OS=Mus musculus OX=10090 GN=Kif7 PE=1 SV=1	Kif7	40418816	12	7.60658	1350	85.1198		SLGSALRPSTS	Vimentin OS=Mus musculus OX=10090 GN=Vim PE=1 SV=3	Vim	16136234	11	7.2078	391	62.3604
FSPTNPAHLL	WD repeat-containing protein 76 OS=Mus musculus OX=10090 GN=Wdr76 PE=1 SV=1	Wdr76	40412892	10	7.60652	1349	85.0567		VRAVRPKVLM	60S ribosomal protein L34 OS=Mus musculus OX=10090 GN=Rpl34 PE=1 SV=2	Rpl34	16060413	10	7.20576	390	62.201
AKLVNQEVL	NADH-ubiquinone oxidoreductase 75 kDa subunit, mitochondrial OS=Mus musculus OX=10090 GN=Ndufs1 PE=1 SV=2	Ndufs1	40208480	9	7.60432	1348	84.9937		NEATGGKYVPR	Tubulin beta-5 chain OS=Mus musculus OX=10090 GN=Tubb5 PE=1 SV=1;Tubulin beta-4B chain OS=Mus musculus OX=10090 GN=Tubb4b PE=1 SV=1	Tubb5	16037549	11	7.20514	389	62.0415
RKGQVIQF	60S ribosomal protein L36a OS=Mus musculus OX=10090 GN=Rpl36a PE=3 SV=2	Rpl36a	40178016	8	7.60399	1347	84.9306		GVDARGIAKV	Protein kinase C epsilon type OS=Mus musculus OX=10090 GN=Prkce PE=1 SV=1	Prkce	16013325	10	7.20448	388	61.882
ISGVNGTHI	SRSF protein kinase 1 OS=Mus musculus OX=10090 GN=Srpk1 PE=1 SV=2	Srpk1	39622420	9	7.59794	1346	84.8676		VNFVHTNL	60S ribosomal protein L4 OS=Mus musculus OX=10090 GN=Rpl4 PE=1 SV=3	Rpl4	16003689	8	7.20422	387	61.7225
SALANYIHL	Integral membrane protein GPR180 OS=Mus musculus OX=10090 GN=Gpr180 PE=1 SV=1	Gpr180	39318004	9	7.59459	1345	84.8045		KSYSFIARM	Calcium homeostasis endoplasmic reticulum protein OS=Mus musculus OX=10090 GN=Cherp PE=1 SV=1	Cherp	15967317	9	7.20323	386	61.563
SSLSNPIANTM	F-box only protein 33 OS=Mus musculus OX=10090 GN=Fbxo33 PE=1 SV=3	Fbxo33	39289820	11	7.59428	1344	84.7415		VGLINKDSV	Histone-lysine N-methyltransferase ASH1L OS=Mus musculus OX=10090 GN=Ash1l PE=1 SV=3	Ash1l	15913891	9	7.20178	385	61.4035
RIYGFTAV	E3 ubiquitin-protein ligase HECTD1 OS=Mus musculus OX=10090 GN=Hectd1 PE=1 SV=2	Hectd1	39185212	8	7.59312	1343	84.6784		KADGIVSKNF	40S ribosomal protein S21 OS=Mus musculus OX=10090 GN=Rps21 PE=1 SV=1	Rps21	15799493	10	7.19864	384	61.244
GPMKSGNFGGS	Heterogeneous nuclear ribonucleoproteins A2/B1 OS=Mus musculus OX=10090 GN=Hnrnpa2b1 PE=1 SV=2	Hnrnpa2b1	38802256	11	7.58886	1342	84.6154		DAGAGIALNDNF	Glyceraldehyde-3-phosphate dehydrogenase OS=Mus musculus OX=10090 GN=Gapdh PE=1 SV=2	Gapdh	15688451	12	7.19558	383	61.0845
VGLINKDSV	Histone-lysine N-methyltransferase ASH1L OS=Mus musculus OX=10090 GN=Ash1l PE=1 SV=3	Ash1l	38656516	9	7.58722	1341	84.5523		SGYDFENRL	Tetratricopeptide repeat protein 39C OS=Mus musculus OX=10090 GN=Ttc39c PE=1 SV=2	Ttc39c	15660878	9	7.19482	382	60.925
TNQDFIQRL	Nischarin OS=Mus musculus OX=10090 GN=Nisch PE=1 SV=2	Nisch	38618464	9	7.58679	1340	84.4893		VSFTYRYL	Vacuolar protein sorting-associated protein 16 homolog OS=Mus musculus OX=10090 GN=Vps16 PE=1 SV=3	Vps16	15656665	8	7.1947	381	60.7656
SSWTFPVT	Mitogen-activated protein kinase kinase kinase 6 OS=Mus musculus OX=10090 GN=Map3k6 PE=1 SV=4	Map3k6	38594688	8	7.58653	1339	84.4262		AVLSFSTRL	Dolichyl-diphosphooligosaccharide--protein glycosyltransferase subunit STT3A OS=Mus musculus OX=10090 GN=Stt3a PE=1 SV=1	Stt3a	15568570	9	7.19225	380	60.6061
AAGVGDMVM	60S ribosomal protein L23 OS=Mus musculus OX=10090 GN=Rpl23 PE=1 SV=1	Rpl23	38554164	9	7.58607	1338	84.3632		ASIVNKDGL	Peroxisome proliferator-activated receptor delta OS=Mus musculus OX=10090 GN=Ppard PE=1 SV=1	Ppard	15566872	9	7.1922	379	60.4466
KSLKNFITI	Cysteine--tRNA ligase, cytoplasmic OS=Mus musculus OX=10090 GN=Cars1 PE=1 SV=2	Cars1	38437904	9	7.58476	1337	84.3001		FSHEGPAFL	5,6-dihydroxyindole-2-carboxylic acid oxidase OS=Mus musculus OX=10090 GN=Tyrp1 PE=1 SV=1	Tyrp1	15521382	9	7.19093	378	60.2871
KLPKQPVIVK	60S ribosomal protein L27a OS=Mus musculus OX=10090 GN=Rpl27a PE=1 SV=5	Rpl27a	38388204	10	7.5842	1336	84.2371		KVGINYQPP	Tubulin alpha-1B chain OS=Mus musculus OX=10090 GN=Tuba1b PE=1 SV=2	Tuba1b	15500814	9	7.19035	377	60.1276
SFNKEEVLK	T-cell-specific guanine nucleotide triphosphate-binding protein 1 OS=Mus musculus OX=10090 GN=Tgtp1 PE=1 SV=1	Tgtp1	38289776	9	7.58308	1335	84.174		VSSINQEAL	Chromatin accessibility complex protein 1 OS=Mus musculus OX=10090 GN=Chrac1 PE=1 SV=1	Chrac1	15447939	9	7.18887	376	59.9681
FAIDDHDYL	Phosphatidylinositol 5-phosphate 4-kinase type-2 gamma OS=Mus musculus OX=10090 GN=Pip4k2c PE=1 SV=1	Pip4k2c	38283264	9	7.58301	1334	84.111		AGLTHIITM	Phosphoribosyl pyrophosphate synthase-associated protein 1 OS=Mus musculus OX=10090 GN=Prpsap1 PE=1 SV=1	Prpsap1	15445670	9	7.18881	375	59.8086
AAPRSFIFL	N6-adenosine-methyltransferase non-catalytic subunit OS=Mus musculus OX=10090 GN=Mettl14 PE=1 SV=1	Mettl14	38096480	9	7.58088	1333	84.0479		SILVNQEVL	Signal transducer and activator of transcription 4 OS=Mus musculus OX=10090 GN=Stat4 PE=1 SV=1	Stat4	15370321	9	7.18668	374	59.6491
RIEEELGSKAKF	Alpha-enolase OS=Mus musculus OX=10090 GN=Eno1 PE=1 SV=3	Eno1	38050768	12	7.58036	1332	83.9849		TNLIYQQV	Unconventional myosin-VIIa OS=Mus musculus OX=10090 GN=Myo7a PE=1 SV=2	Myo7a	15135322	8	7.17999	373	59.4896
KEYMVTIR	Docking protein 2 OS=Mus musculus OX=10090 GN=Dok2 PE=1 SV=1	Dok2	37807940	8	7.57758	1331	83.9218		VSSLITTDM	DNA cross-link repair 1A protein OS=Mus musculus OX=10090 GN=Dclre1a PE=1 SV=2	Dclre1a	15087649	9	7.17862	372	59.3301
ILGTNTIMDK	Heterogeneous nuclear ribonucleoprotein U OS=Mus musculus OX=10090 GN=Hnrnpu PE=1 SV=1	Hnrnpu	37723948	10	7.57662	1330	83.8588		SSVQNGIML	E3 ubiquitin-protein ligase Praja-2 OS=Mus musculus OX=10090 GN=Pja2 PE=1 SV=2	Pja2	15084952	9	7.17854	371	59.1707
AAGAGKVTK	Elongation factor 1-alpha 1 OS=Mus musculus OX=10090 GN=Eef1a1 PE=1 SV=3	Eef1a1	37622588	9	7.57545	1329	83.7957		KRHMITHSEK	PR domain zinc finger protein 5 OS=Mus musculus OX=10090 GN=Prdm5 PE=2 SV=2	Prdm5	15043334	10	7.17734	370	59.0112
SLADAINTEF	Vimentin OS=Mus musculus OX=10090 GN=Vim PE=1 SV=3	Vim	37621328	10	7.57543	1328	83.7327		NQVANPNSAIF	Eukaryotic translation initiation factor 4H OS=Mus musculus OX=10090 GN=Eif4h PE=1 SV=3	Eif4h	15000121	11	7.17609	369	58.8517
YESLKGVDPKFL	60S ribosomal protein L29 OS=Mus musculus OX=10090 GN=Rpl29 PE=1 SV=2	Rpl29	37549552	12	7.5746	1327	83.6696		SNPDIASETL	Rho guanine nucleotide exchange factor 17 OS=Mus musculus OX=10090 GN=Arhgef17 PE=1 SV=2	Arhgef17	14914037	10	7.1736	368	58.6922
SVYVYKVL	Histone H2B type 1-B OS=Mus musculus OX=10090 GN=H2bc3 PE=1 SV=3;Histone H2B type 1-F/J/L OS=Mus musculus OX=10090 GN=H2bc7 PE=1 SV=2	H2bc3	37525020	8	7.57432	1326	83.6066		FGLGAEQRPPAA	Activity-dependent neuroprotector homeobox protein OS=Mus musculus OX=10090 GN=Adnp PE=1 SV=2	Adnp	14910614	12	7.1735	367	58.5327
WEKADINTKW	60S ribosomal protein L14 OS=Mus musculus OX=10090 GN=Rpl14 PE=1 SV=3	Rpl14	37362344	10	7.57243	1325	83.5435		ARIIFNQV	Bcl-2-related protein A1 OS=Mus musculus OX=10090 GN=Bcl2a1 PE=1 SV=1	Bcl2a1	14886141	8	7.17278	366	58.3732
FLQSLGETA	Collagen alpha-4(VI) chain OS=Mus musculus OX=10090 GN=Col6a4 PE=1 SV=2	Col6a4	37292420	9	7.57162	1324	83.4805		TKAPKIQRLVTP	40S ribosomal protein S6 OS=Mus musculus OX=10090 GN=Rps6 PE=1 SV=1	Rps6	14834192	12	7.17126	365	58.2137
IQLMNTAHL	Peroxisomal carnitine O-octanoyltransferase OS=Mus musculus OX=10090 GN=Crot PE=1 SV=1	Crot	37258711	9	7.57123	1323	83.4174		AVTVAPPGAR	Heterogeneous nuclear ribonucleoprotein U OS=Mus musculus OX=10090 GN=Hnrnpu PE=1 SV=1	Hnrnpu	14815074	10	7.1707	364	58.0542
GKKLEDGPKFL	Elongation factor 1-alpha 1 OS=Mus musculus OX=10090 GN=Eef1a1 PE=1 SV=3	Eef1a1	37214012	11	7.57071	1322	83.3544		KLIEVDDERKLR	40S ribosomal protein S6 OS=Mus musculus OX=10090 GN=Rps6 PE=1 SV=1	Rps6	14789055	12	7.16994	363	57.8947
RTLIYITL	Actin-related protein 2/3 complex subunit 3 OS=Mus musculus OX=10090 GN=Arpc3 PE=1 SV=3	Arpc3	37112612	8	7.56952	1321	83.2913		NITRMPNHL	Secreted frizzled-related sequence protein 4 OS=Mus musculus OX=10090 GN=Sfrp4 PE=2 SV=1	Sfrp4	14674453	9	7.16656	362	57.7352
LIYKFLNV	Exportin-1 OS=Mus musculus OX=10090 GN=Xpo1 PE=1 SV=1	Xpo1	37055136	8	7.56885	1320	83.2282		VAVVNKVDI	NPC intracellular cholesterol transporter 1 OS=Mus musculus OX=10090 GN=Npc1 PE=1 SV=2	Npc1	14630529	9	7.16526	361	57.5758
REEYPDRIM	Tubulin beta-3 chain OS=Mus musculus OX=10090 GN=Tubb3 PE=1 SV=1;Tubulin beta-5 chain OS=Mus musculus OX=10090 GN=Tubb5 PE=1 SV=1;Tubulin beta-4B chain OS=Mus musculus OX=10090 GN=Tubb4b PE=1 SV=1;Tubulin beta-6 chain OS=Mus musculus OX=10090 GN=Tubb6 PE=1 SV=1	Tubb3	36667334	9	7.56428	1319	83.1652		SLPLVDTHSK	Vimentin OS=Mus musculus OX=10090 GN=Vim PE=1 SV=3	Vim	14469456	10	7.16045	360	57.4163
SSPGGAYVTR	Vimentin OS=Mus musculus OX=10090 GN=Vim PE=1 SV=3	Vim	36553900	10	7.56293	1318	83.1021		RLEKPAKY	Glyceraldehyde-3-phosphate dehydrogenase OS=Mus musculus OX=10090 GN=Gapdh PE=1 SV=2	Gapdh	14424642	8	7.15911	359	57.2568
IAVANAQEL	Mitochondrial import inner membrane translocase subunit Tim13 OS=Mus musculus OX=10090 GN=Timm13 PE=1 SV=1	Timm13	36440760	9	7.56159	1317	83.0391		YGIRNSLLI	Ribonucleoside-diphosphate reductase large subunit OS=Mus musculus OX=10090 GN=Rrm1 PE=1 SV=2	Rrm1	14421124	9	7.159	358	57.0973
SETGAGKHVP	Tubulin alpha-1A chain OS=Mus musculus OX=10090 GN=Tuba1a PE=1 SV=1;Tubulin alpha-1C chain OS=Mus musculus OX=10090 GN=Tuba1c PE=1 SV=1	Tuba1a	36435404	10	7.56152	1316	82.976		WISKQEYDESGP	Actin, cytoplasmic 1 OS=Mus musculus OX=10090 GN=Actb PE=1 SV=1	Actb	14346719	12	7.15675	357	56.9378
FVIRNIVEA	40S ribosomal protein S26 OS=Mus musculus OX=10090 GN=Rps26 PE=1 SV=3	Rps26	36265776	9	7.5595	1315	82.913		FSETGAGKHVPR	Tubulin alpha-1B chain OS=Mus musculus OX=10090 GN=Tuba1b PE=1 SV=2	Tuba1b	14302359	12	7.15541	356	56.7783
NGKLTGMAF	Glyceraldehyde-3-phosphate dehydrogenase OS=Mus musculus OX=10090 GN=Gapdh PE=1 SV=2	Gapdh	36065044	9	7.55709	1314	82.8499		IAVANAQEL	Mitochondrial import inner membrane translocase subunit Tim13 OS=Mus musculus OX=10090 GN=Timm13 PE=1 SV=1	Timm13	14224565	9	7.15304	355	56.6188
YVHVNRDTL	Bifunctional polynucleotide phosphatase/kinase OS=Mus musculus OX=10090 GN=Pnkp PE=1 SV=2	Pnkp	35986116	9	7.55613	1313	82.7869		TKKVGIVGKY	60S ribosomal protein L37a OS=Mus musculus OX=10090 GN=Rpl37a PE=1 SV=2	Rpl37a	14223363	10	7.153	354	56.4593
RYRAGAKKLAP	Inner nuclear membrane protein Man1 OS=Mus musculus OX=10090 GN=Lemd3 PE=1 SV=2	Lemd3	35587056	11	7.55129	1312	82.7238		AALLVNYIT	Synaptic vesicle membrane protein VAT-1 homolog OS=Mus musculus OX=10090 GN=Vat1 PE=1 SV=3	Vat1	14163506	9	7.15117	353	56.2998
KGVFNVEVV	Dedicator of cytokinesis protein 7 OS=Mus musculus OX=10090 GN=Dock7 PE=1 SV=3	Dock7	35585376	9	7.55127	1311	82.6608		EAVVISGRKLA	Bifunctional methylenetetrahydrofolate dehydrogenase/cyclohydrolase, mitochondrial OS=Mus musculus OX=10090 GN=Mthfd2 PE=1 SV=1	Mthfd2	14129140	11	7.15012	352	56.1404
SQVLANGLDNK	40S ribosomal protein S18 OS=Mus musculus OX=10090 GN=Rps18 PE=1 SV=3	Rps18	35440304	11	7.5495	1310	82.5977		IQAENAEFM	Heme oxygenase 1 OS=Mus musculus OX=10090 GN=Hmox1 PE=1 SV=1	Hmox1	14017600	9	7.14667	351	55.9809
YFDDLDNQIKKM	Cyclin-dependent kinase 1 OS=Mus musculus OX=10090 GN=Cdk1 PE=1 SV=3	Cdk1	35429100	12	7.54936	1309	82.5347		KSIVNQVFL	E3 ubiquitin-protein ligase RNFT1 OS=Mus musculus OX=10090 GN=Rnft1 PE=2 SV=1	Rnft1	13925733	9	7.14382	350	55.8214
LQQQLEQL	Max dimerization protein 3 OS=Mus musculus OX=10090 GN=Mxd3 PE=1 SV=1	Mxd3	35233416	8	7.54695	1308	82.4716		SSLSNPIANTM	F-box only protein 33 OS=Mus musculus OX=10090 GN=Fbxo33 PE=1 SV=3	Fbxo33	13872983	11	7.14217	349	55.6619
KLTSDDVKEQIY	40S ribosomal protein S13 OS=Mus musculus OX=10090 GN=Rps13 PE=1 SV=2	Rps13	35144044	12	7.54585	1307	82.4086		ANLSNLQRL	Leucine-rich repeat and transmembrane domain-containing protein 2 OS=Mus musculus OX=10090 GN=Lrtm2 PE=2 SV=1	Lrtm2	13846123	9	7.14133	348	55.5024
TVIDEVRTGTY	Tubulin alpha-1A chain OS=Mus musculus OX=10090 GN=Tuba1a PE=1 SV=1;Tubulin alpha-1C chain OS=Mus musculus OX=10090 GN=Tuba1c PE=1 SV=1	Tuba1a	35140444	11	7.54581	1306	82.3455		TLLIKTVETR	Vimentin OS=Mus musculus OX=10090 GN=Vim PE=1 SV=3	Vim	13816934	10	7.14041	347	55.3429
ESLKGVDPKFL	60S ribosomal protein L29 OS=Mus musculus OX=10090 GN=Rpl29 PE=1 SV=2	Rpl29	35062720	11	7.54485	1305	82.2825		SLSTSSMHGG	Protein TALPID3 OS=Mus musculus OX=10090 GN=Talpid3 PE=1 SV=1	Talpid3	13737330	10	7.1379	346	55.1834
IEYMAPEII	Ribosomal protein S6 kinase alpha-4 OS=Mus musculus OX=10090 GN=Rps6ka4 PE=1 SV=2	Rps6ka4	35050732	9	7.5447	1304	82.2194		NAGVEGSLIVEK	60 kDa heat shock protein, mitochondrial OS=Mus musculus OX=10090 GN=Hspd1 PE=1 SV=1	Hspd1	13731429	12	7.13772	345	55.0239
HSILEVNVCP	Vacuolar protein sorting-associated protein 13A OS=Mus musculus OX=10090 GN=Vps13a PE=1 SV=1	Vps13a	34937972	10	7.5433	1303	82.1564		DVQLQESG	Ig heavy chain V region MOPC 315 OS=Mus musculus OX=10090 PE=1 SV=2	?	13710128	8	7.13704	344	54.8644
SLEVSSLNIL	E3 ISG15--protein ligase Herc6 OS=Mus musculus OX=10090 GN=Herc6 PE=2 SV=1	Herc6	34903624	10	7.54287	1302	82.0933		LEKPAKYDDIKK	Glyceraldehyde-3-phosphate dehydrogenase OS=Mus musculus OX=10090 GN=Gapdh PE=1 SV=2	Gapdh	13668590	12	7.13572	343	54.7049
AGLTHIITM	Phosphoribosyl pyrophosphate synthase-associated protein 1 OS=Mus musculus OX=10090 GN=Prpsap1 PE=1 SV=1;Phosphoribosyl pyrophosphate synthase-associated protein 2 OS=Mus musculus OX=10090 GN=Prpsap2 PE=1 SV=1	Prpsap1	34828524	9	7.54194	1301	82.0303		IVVSHILED	ATP-binding cassette sub-family A member 13 OS=Mus musculus OX=10090 GN=Abca13 PE=2 SV=1	Abca13	13594944	9	7.13338	342	54.5455
SLVRKIVER	Trifunctional purine biosynthetic protein adenosine-3 OS=Mus musculus OX=10090 GN=Gart PE=1 SV=3	Gart	34687724	9	7.54018	1300	81.9672		SGTLMMAF	IQ motif and SEC7 domain-containing protein 3 OS=Mus musculus OX=10090 GN=Iqsec3 PE=1 SV=1	Iqsec3	13525619	8	7.13116	341	54.386
IVGINLTEM	ELMO domain-containing protein 2 OS=Mus musculus OX=10090 GN=Elmod2 PE=1 SV=1	Elmod2	34400840	9	7.53657	1299	81.9042		SALQNAESDRL	Centromere-associated protein E OS=Mus musculus OX=10090 GN=Cenpe PE=1 SV=1	Cenpe	13424985	11	7.12791	340	54.2265
ASIVNKDGL	Peroxisome proliferator-activated receptor delta OS=Mus musculus OX=10090 GN=Ppard PE=1 SV=1	Ppard	34385144	9	7.53637	1298	81.8411		PKFEVIDKPQS	ATP synthase-coupling factor 6, mitochondrial OS=Mus musculus OX=10090 GN=Atp5pf PE=1 SV=1	Atp5pf	13412805	11	7.12752	339	54.067
GWTANMERIMKA	Heat shock protein HSP 90-alpha OS=Mus musculus OX=10090 GN=Hsp90aa1 PE=1 SV=4;Heat shock protein HSP 90-beta OS=Mus musculus OX=10090 GN=Hsp90ab1 PE=1 SV=3	Hsp90aa1	34333800	12	7.53572	1297	81.7781		FLSSTMQTL	Canalicular multispecific organic anion transporter 2 OS=Mus musculus OX=10090 GN=Abcc3 PE=1 SV=1	Abcc3	13276263	9	7.12308	338	53.9075
SQIVSSITASL	Tubulin alpha-8 chain OS=Mus musculus OX=10090 GN=Tuba8 PE=1 SV=1;Tubulin alpha-1C chain OS=Mus musculus OX=10090 GN=Tuba1c PE=1 SV=1	Tuba8	34316924	11	7.53551	1296	81.715		ALPMTALR	Leucine-rich repeat transmembrane protein FLRT3 OS=Mus musculus OX=10090 GN=Flrt3 PE=1 SV=1	Flrt3	13124201	8	7.11807	337	53.748
LFHPEQLITG	Tubulin alpha-8 chain OS=Mus musculus OX=10090 GN=Tuba8 PE=1 SV=1;Tubulin alpha-1A chain OS=Mus musculus OX=10090 GN=Tuba1a PE=1 SV=1;Tubulin alpha-1C chain OS=Mus musculus OX=10090 GN=Tuba1c PE=1 SV=1	Tuba8	34311616	10	7.53544	1295	81.652		AAIVDGDRI	Serine/threonine-protein kinase MRCK beta OS=Mus musculus OX=10090 GN=Cdc42bpb PE=1 SV=2	Cdc42bpb	13115931	9	7.1178	336	53.5885
TTDSFDDYPPR	Eukaryotic translation initiation factor 4B OS=Mus musculus OX=10090 GN=Eif4b PE=1 SV=1	Eif4b	34274236	11	7.53497	1294	81.5889		SELARHTR	Adhesion G protein-coupled receptor L1 OS=Mus musculus OX=10090 GN=Adgrl1 PE=1 SV=2	Adgrl1	13079557	8	7.11659	335	53.429
RQYNMVPFWPPV	5,6-dihydroxyindole-2-carboxylic acid oxidase OS=Mus musculus OX=10090 GN=Tyrp1 PE=1 SV=1	Tyrp1	34222292	12	7.53431	1293	81.5259		RALSNLESI	Ubiquilin-3 OS=Mus musculus OX=10090 GN=Ubqln3 PE=1 SV=1	Ubqln3	13018941	9	7.11458	334	53.2695
RNGMILKP	60S ribosomal protein L13 OS=Mus musculus OX=10090 GN=Rpl13 PE=1 SV=3	Rpl13	34190588	8	7.53391	1292	81.4628		RSIQNAQFL	Lysosomal acid phosphatase OS=Mus musculus OX=10090 GN=Acp2 PE=1 SV=2	Acp2	13000181	9	7.11395	333	53.11
YMGRQPPPPP	Pancreas/duodenum homeobox protein 1 OS=Mus musculus OX=10090 GN=Pdx1 PE=1 SV=1	Pdx1	33824568	10	7.52923	1291	81.3997		AGTRNIYYL	Heat shock protein 75 kDa, mitochondrial OS=Mus musculus OX=10090 GN=Trap1 PE=1 SV=1	Trap1	12960081	9	7.11261	332	52.9506
FVKLISWYDNE	Glyceraldehyde-3-phosphate dehydrogenase OS=Mus musculus OX=10090 GN=Gapdh PE=1 SV=2	Gapdh	33816048	11	7.52912	1290	81.3367		DHPIVETLR	Heat shock protein HSP 90-beta OS=Mus musculus OX=10090 GN=Hsp90ab1 PE=1 SV=3	Hsp90ab1	12880035	9	7.10992	331	52.7911
SSVQNGIML	E3 ubiquitin-protein ligase Praja-2 OS=Mus musculus OX=10090 GN=Pja2 PE=1 SV=2	Pja2	33815976	9	7.52912	1289	81.2736		HIADLAGNP	Alpha-enolase OS=Mus musculus OX=10090 GN=Eno1 PE=1 SV=3	Eno1	12744763	9	7.10533	330	52.6316
RRVREEEIEVDS	Nucleolar and coiled-body phosphoprotein 1 OS=Mus musculus OX=10090 GN=Nolc1 PE=1 SV=1	Nolc1	33384900	12	7.52355	1288	81.2106		SAVASFVTQL	Nicastrin OS=Mus musculus OX=10090 GN=Ncstn PE=1 SV=3	Ncstn	12615313	10	7.1009	329	52.4721
KEDAANNY	Tubulin alpha-8 chain OS=Mus musculus OX=10090 GN=Tuba8 PE=1 SV=1;Tubulin alpha-1A chain OS=Mus musculus OX=10090 GN=Tuba1a PE=1 SV=1;Tubulin alpha-1C chain OS=Mus musculus OX=10090 GN=Tuba1c PE=1 SV=1	Tuba8	33128034	8	7.5202	1287	81.1475		ILGTNTIMDK	Heterogeneous nuclear ribonucleoprotein U OS=Mus musculus OX=10090 GN=Hnrnpu PE=1 SV=1	Hnrnpu	12562191	10	7.09907	328	52.3126
AALQSSWGMM	TAR DNA-binding protein 43 OS=Mus musculus OX=10090 GN=Tardbp PE=1 SV=1	Tardbp	33027768	10	7.51888	1286	81.0845		ASHLNLDAL	E3 ubiquitin-protein ligase TRIM32 OS=Mus musculus OX=10090 GN=Trim32 PE=1 SV=2	Trim32	12509519	9	7.09724	327	52.1531
TVIIEQSWGSPK	60 kDa heat shock protein, mitochondrial OS=Mus musculus OX=10090 GN=Hspd1 PE=1 SV=1	Hspd1	32957212	12	7.51795	1285	81.0214		SLEELRVAGIH	60S ribosomal protein L13 OS=Mus musculus OX=10090 GN=Rpl13 PE=1 SV=3	Rpl13	12383450	11	7.09284	326	51.9936
RDDWEEKRHF	Matrin-3 OS=Mus musculus OX=10090 GN=Matr3 PE=1 SV=1	Matr3	32911045	10	7.51734	1284	80.9584		IGIVKQAGLDR	Heterogeneous nuclear ribonucleoprotein F OS=Mus musculus OX=10090 GN=Hnrnpf PE=1 SV=3	Hnrnpf	12356032	11	7.09188	325	51.8341
GFGDSRGGGGNF	Heterogeneous nuclear ribonucleoproteins A2/B1 OS=Mus musculus OX=10090 GN=Hnrnpa2b1 PE=1 SV=2	Hnrnpa2b1	32739870	12	7.51508	1283	80.8953		TVIDEVRTGTY	Tubulin alpha-1B chain OS=Mus musculus OX=10090 GN=Tuba1b PE=1 SV=2	Tuba1b	12331961	11	7.09103	324	51.6746
APIRPDIVNF	60S ribosomal protein L4 OS=Mus musculus OX=10090 GN=Rpl4 PE=1 SV=3	Rpl4	32499802	10	7.51188	1282	80.8323		TLGAPLAP	Kinesin-like protein KIF18B OS=Mus musculus OX=10090 GN=Kif18b PE=2 SV=2	Kif18b	12296978	8	7.0898	323	51.5152
ATQVYPKL	BRISC and BRCA1-A complex member 2 OS=Mus musculus OX=10090 GN=Babam2 PE=1 SV=2	Babam2	32396960	8	7.5105	1281	80.7692		GFQNAILVR	Albumin OS=Mus musculus OX=10090 GN=Alb PE=1 SV=3	Alb	12205262	9	7.08655	322	51.3557
GGIQNVGHI	Inosine-5'-monophosphate dehydrogenase 2 OS=Mus musculus OX=10090 GN=Impdh2 PE=1 SV=2	Impdh2	32313632	9	7.50939	1280	80.7062		SDYPPLGR	Elongation factor 1-alpha 1 OS=Mus musculus OX=10090 GN=Eef1a1 PE=1 SV=3	Eef1a1	12130644	8	7.08388	321	51.1962
HEFLQTEI	DNA (cytosine-5)-methyltransferase 1 OS=Mus musculus OX=10090 GN=Dnmt1 PE=1 SV=5	Dnmt1	32263848	8	7.50872	1279	80.6431		KVFEYHNV	Amyloid protein-binding protein 2 OS=Mus musculus OX=10090 GN=Appbp2 PE=2 SV=1	Appbp2	12086654	8	7.08231	320	51.0367
FSETGAGKHVP	Tubulin alpha-1A chain OS=Mus musculus OX=10090 GN=Tuba1a PE=1 SV=1;Tubulin alpha-1C chain OS=Mus musculus OX=10090 GN=Tuba1c PE=1 SV=1	Tuba1a	32191916	11	7.50775	1278	80.5801		ASLVNSPSYL	Transmembrane protein 131-like OS=Mus musculus OX=10090 GN=Tmem131l PE=1 SV=1	Tmem131l	11999056	10	7.07915	319	50.8772
SQHVNLDQL	Beclin 1-associated autophagy-related key regulator OS=Mus musculus OX=10090 GN=Atg14 PE=1 SV=1	Atg14	31686970	9	7.50088	1277	80.517		SNYGPMKGGSF	Heterogeneous nuclear ribonucleoprotein A3 OS=Mus musculus OX=10090 GN=Hnrnpa3 PE=1 SV=1	Hnrnpa3	11919816	11	7.07627	318	50.7177
MTCGDVDVLI	DNA polymerase lambda OS=Mus musculus OX=10090 GN=Poll PE=2 SV=1	Poll	31576044	10	7.49936	1276	80.454		NGKLTGMAF	Glyceraldehyde-3-phosphate dehydrogenase OS=Mus musculus OX=10090 GN=Gapdh PE=1 SV=2	Gapdh	11756798	9	7.07029	317	50.5582
GLQFPVGRIH	Histone H2A.Z OS=Mus musculus OX=10090 GN=H2az1 PE=1 SV=2	H2az1	31561384	10	7.49916	1275	80.3909		DVNAAIATIKTK	Tubulin alpha-1B chain OS=Mus musculus OX=10090 GN=Tuba1b PE=1 SV=2	Tuba1b	11721169	12	7.06897	316	50.3987
SLGKNPTDAYL	Myosin regulatory light chain 12B OS=Mus musculus OX=10090 GN=Myl12b PE=1 SV=2	Myl12b	31331954	11	7.49599	1274	80.3279		DAGAGIALNDN	Glyceraldehyde-3-phosphate dehydrogenase OS=Mus musculus OX=10090 GN=Gapdh PE=1 SV=2	Gapdh	11681092	11	7.06748	315	50.2392
VGPVNKKGFYL	Ephrin type-A receptor 3 OS=Mus musculus OX=10090 GN=Epha3 PE=1 SV=1	Epha3	31253940	11	7.4949	1273	80.2648		GKKLEDGPKFL	Elongation factor 1-alpha 1 OS=Mus musculus OX=10090 GN=Eef1a1 PE=1 SV=3	Eef1a1	11622172	11	7.06529	314	50.0797
RFDGALNVDLTE	Tubulin alpha-8 chain OS=Mus musculus OX=10090 GN=Tuba8 PE=1 SV=1;Tubulin alpha-1A chain OS=Mus musculus OX=10090 GN=Tuba1a PE=1 SV=1;Tubulin alpha-1C chain OS=Mus musculus OX=10090 GN=Tuba1c PE=1 SV=1	Tuba8	31035088	12	7.49185	1272	80.2018		VAFAYKNV	Translocon-associated protein subunit gamma OS=Mus musculus OX=10090 GN=Ssr3 PE=1 SV=1	Ssr3	11620147	8	7.06521	313	49.9203
KIYQWINEL	CCR4-NOT transcription complex subunit 9 OS=Mus musculus OX=10090 GN=Cnot9 PE=1 SV=1	Cnot9	30997270	9	7.49132	1271	80.1387		RVMEYINRL	Clathrin heavy chain 1 OS=Mus musculus OX=10090 GN=Cltc PE=1 SV=3	Cltc	1.14796e+07	9	7.05992	312	49.7608
GPMKGGNF	Heterogeneous nuclear ribonucleoprotein A1 OS=Mus musculus OX=10090 GN=Hnrnpa1 PE=1 SV=2	Hnrnpa1	30930948	8	7.49039	1270	80.0757		KRLTKGGKKGA	40S ribosomal protein S3a OS=Mus musculus OX=10090 GN=Rps3a PE=1 SV=3	Rps3a	11469338	11	7.05954	311	49.6013
APSRNGMILKP	60S ribosomal protein L13 OS=Mus musculus OX=10090 GN=Rpl13 PE=1 SV=3	Rpl13	30837086	11	7.48907	1269	80.0126		SGLLNSQAL	Fatty acid synthase OS=Mus musculus OX=10090 GN=Fasn PE=1 SV=2	Fasn	11295401	9	7.0529	310	49.4418
YAVSELAGH	60S ribosomal protein L4 OS=Mus musculus OX=10090 GN=Rpl4 PE=1 SV=3	Rpl4	30784554	9	7.48833	1268	79.9496		SNYHFYSSI	Nuclear factor erythroid 2-related factor 2 OS=Mus musculus OX=10090 GN=Nfe2l2 PE=1 SV=2	Nfe2l2	11266968	9	7.05181	309	49.2823
AAIRNYGIEL	Methylenetetrahydrofolate reductase OS=Mus musculus OX=10090 GN=Mthfr PE=1 SV=2	Mthfr	30614966	10	7.48593	1267	79.8865		AAPIDRVGQTIE	Heterogeneous nuclear ribonucleoprotein M OS=Mus musculus OX=10090 GN=Hnrnpm PE=1 SV=3	Hnrnpm	11205336	12	7.04942	308	49.1228
RMPEKVTWM	60S ribosomal protein L19 OS=Mus musculus OX=10090 GN=Rpl19 PE=1 SV=1	Rpl19	30605611	9	7.4858	1266	79.8235		LSLENGTHTL	DNA (cytosine-5)-methyltransferase 1 OS=Mus musculus OX=10090 GN=Dnmt1 PE=1 SV=5	Dnmt1	11139932	10	7.04688	307	48.9633
ISGVNRYYV	NADH dehydrogenase [ubiquinone] 1 alpha subcomplex subunit 1 OS=Mus musculus OX=10090 GN=Ndufa1 PE=1 SV=1	Ndufa1	30528432	9	7.4847	1265	79.7604		AALKLGQEL	Protein flightless-1 homolog OS=Mus musculus OX=10090 GN=Flii PE=1 SV=1	Flii	11123443	9	7.04624	306	48.8038
IGIVKQAGL	Heterogeneous nuclear ribonucleoprotein F OS=Mus musculus OX=10090 GN=Hnrnpf PE=1 SV=3	Hnrnpf	30410490	9	7.48302	1264	79.6974		ATLLEFGW	Uncharacterized protein KIAA0825 homolog OS=Mus musculus OX=10090 PE=2 SV=3	?	11082895	8	7.04465	305	48.6443
KSIVNQVFL	E3 ubiquitin-protein ligase RNFT1 OS=Mus musculus OX=10090 GN=Rnft1 PE=2 SV=1	Rnft1	30359470	9	7.48229	1263	79.6343		GQLSNGDHHF	YTH domain-containing family protein 1 OS=Mus musculus OX=10090 GN=Ythdf1 PE=1 SV=1	Ythdf1	11065147	10	7.04396	304	48.4848
GEYGFQNAILVR	Albumin OS=Mus musculus OX=10090 GN=Alb PE=1 SV=3	Alb	30309906	12	7.48158	1262	79.5712		WAVSNREML	E3 ubiquitin-protein ligase RMND5A OS=Mus musculus OX=10090 GN=Rmnd5a PE=1 SV=2	Rmnd5a	11016463	9	7.04204	303	48.3254
VLDKLKAER	Elongation factor 1-alpha 1 OS=Mus musculus OX=10090 GN=Eef1a1 PE=1 SV=3	Eef1a1	30265050	9	7.48094	1261	79.5082		VQYKFSHL	Histone acetyltransferase KAT2A OS=Mus musculus OX=10090 GN=Kat2a PE=1 SV=2	Kat2a	10963598	8	7.03995	302	48.1659
YGYSNRVVDLM	Glyceraldehyde-3-phosphate dehydrogenase OS=Mus musculus OX=10090 GN=Gapdh PE=1 SV=2	Gapdh	30059070	11	7.47798	1260	79.4451		VADKFTEL	Serine/threonine-protein phosphatase 2A 65 kDa regulatory subunit A alpha isoform OS=Mus musculus OX=10090 GN=Ppp2r1a PE=1 SV=3	Ppp2r1a	10950697	8	7.03944	301	48.0064
NSLLTCRT	Fanconi anemia group A protein homolog OS=Mus musculus OX=10090 GN=Fanca PE=2 SV=2	Fanca	30017988	8	7.47738	1259	79.3821		VMYRVIQV	Upstream stimulatory factor 1 OS=Mus musculus OX=10090 GN=Usf1 PE=1 SV=1	Usf1	10927209	8	7.03851	300	47.8469
QSIAFISRL	Transmembrane protein 33 OS=Mus musculus OX=10090 GN=Tmem33 PE=1 SV=1	Tmem33	29940810	9	7.47626	1258	79.319		VITNFSARI	Vacuolar protein sorting-associated protein 51 homolog OS=Mus musculus OX=10090 GN=Vps51 PE=1 SV=2	Vps51	10889822	9	7.03702	299	47.6874
VAYWRQAGL	ATP synthase subunit epsilon, mitochondrial OS=Mus musculus OX=10090 GN=Atp5f1e PE=1 SV=2	Atp5f1e	29742506	9	7.47338	1257	79.256		HEFLQTEI	DNA (cytosine-5)-methyltransferase 1 OS=Mus musculus OX=10090 GN=Dnmt1 PE=1 SV=5	Dnmt1	10859434	8	7.03581	298	47.5279
HIYEFPQL	Protein unc-119 homolog B OS=Mus musculus OX=10090 GN=Unc119b PE=1 SV=1	Unc119b	29666594	8	7.47227	1256	79.1929		KSLLNSKDIM	Thiosulfate sulfurtransferase/rhodanese-like domain-containing protein 3 OS=Mus musculus OX=10090 GN=Tstd3 PE=1 SV=1	Tstd3	10858780	10	7.03578	297	47.3684
KIGRIEDVTP	40S ribosomal protein S14 OS=Mus musculus OX=10090 GN=Rps14 PE=1 SV=3	Rps14	29387458	10	7.46816	1255	79.1299		SQVLANGLDNK	40S ribosomal protein S18 OS=Mus musculus OX=10090 GN=Rps18 PE=1 SV=3	Rps18	10814014	11	7.03399	296	47.2089
RTVRGMLPHKTK	60S ribosomal protein L13a OS=Mus musculus OX=10090 GN=Rpl13a PE=1 SV=4	Rpl13a	29314330	12	7.46708	1254	79.0668		RAMGIALGGL	Chromaffin granule amine transporter OS=Mus musculus OX=10090 GN=Slc18a1 PE=1 SV=1	Slc18a1	10683513	10	7.02871	295	47.0494
FPRLHFFMP	Tubulin beta-3 chain OS=Mus musculus OX=10090 GN=Tubb3 PE=1 SV=1;Tubulin beta-5 chain OS=Mus musculus OX=10090 GN=Tubb5 PE=1 SV=1;Tubulin beta-4B chain OS=Mus musculus OX=10090 GN=Tubb4b PE=1 SV=1;Tubulin beta-6 chain OS=Mus musculus OX=10090 GN=Tubb6 PE=1 SV=1	Tubb3	29177666	9	7.46505	1253	79.0038		YQPYNKDWI	Enhancer of rudimentary homolog OS=Mus musculus OX=10090 GN=Erh PE=1 SV=1	Erh	10668120	9	7.02809	294	46.89
KQILNIYDL	Vacuolar protein sorting-associated protein 11 homolog OS=Mus musculus OX=10090 GN=Vps11 PE=1 SV=3	Vps11	29132510	9	7.46438	1252	78.9407		ALELRDNDKTR	Alpha-enolase OS=Mus musculus OX=10090 GN=Eno1 PE=1 SV=3	Eno1	10547384	11	7.02314	293	46.7305
WKVVNPYYL	5'-AMP-activated protein kinase catalytic subunit alpha-1 OS=Mus musculus OX=10090 GN=Prkaa1 PE=1 SV=2	Prkaa1	29061558	9	7.46332	1251	78.8777		RSRPETGRP	40S ribosomal protein S10 OS=Mus musculus OX=10090 GN=Rps10 PE=1 SV=1	Rps10	10545162	9	7.02305	292	46.571
GSSKLVPVGY	Elongation factor 1-beta OS=Mus musculus OX=10090 GN=Eef1b PE=1 SV=5	Eef1b	29049846	10	7.46314	1250	78.8146		RAIPNNQVL	Endothelial differentiation-related factor 1 OS=Mus musculus OX=10090 GN=Edf1 PE=1 SV=1	Edf1	10486342	9	7.02062	291	46.4115
HGIRWVVI	Aconitate hydratase, mitochondrial OS=Mus musculus OX=10090 GN=Aco2 PE=1 SV=1	Aco2	28886350	8	7.46069	1249	78.7516		SMEVNVDVL	Dysbindin OS=Mus musculus OX=10090 GN=Dtnbp1 PE=1 SV=1	Dtnbp1	10441330	9	7.01876	290	46.252
NRIIKTEVKKLQ	60S ribosomal protein L14 OS=Mus musculus OX=10090 GN=Rpl14 PE=1 SV=3	Rpl14	28749891	12	7.45864	1248	78.6885		RSLDNGGYYI	Tyrosine-protein kinase Blk OS=Mus musculus OX=10090 GN=Blk PE=1 SV=4	Blk	10372409	10	7.01588	289	46.0925
ALRDNSTMGY	Heat shock protein HSP 90-alpha OS=Mus musculus OX=10090 GN=Hsp90aa1 PE=1 SV=4;Heat shock protein HSP 90-beta OS=Mus musculus OX=10090 GN=Hsp90ab1 PE=1 SV=3	Hsp90aa1	28606500	10	7.45646	1247	78.6255		TGVTNRDLI	Rho GTPase-activating protein 21 OS=Mus musculus OX=10090 GN=Arhgap21 PE=1 SV=1	Arhgap21	10337351	9	7.01441	288	45.933
YMPQNPHII	Histone-binding protein RBBP7 OS=Mus musculus OX=10090 GN=Rbbp7 PE=1 SV=1	Rbbp7	28504192	9	7.45491	1246	78.5624		KIGRIEDVTP	40S ribosomal protein S14 OS=Mus musculus OX=10090 GN=Rps14 PE=1 SV=3	Rps14	10311127	10	7.01331	287	45.7735
KAPKIQRLVTP	40S ribosomal protein S6 OS=Mus musculus OX=10090 GN=Rps6 PE=1 SV=1	Rps6	28445904	11	7.45402	1245	78.4994		TAPQYYRL	DALR anticodon-binding domain-containing protein 3 OS=Mus musculus OX=10090 GN=Dalrd3 PE=2 SV=1	Dalrd3	10263576	8	7.0113	286	45.614
SLEDPQTH	Heat shock protein HSP 90-alpha OS=Mus musculus OX=10090 GN=Hsp90aa1 PE=1 SV=4;Heat shock protein HSP 90-beta OS=Mus musculus OX=10090 GN=Hsp90ab1 PE=1 SV=3	Hsp90aa1	28420236	8	7.45363	1244	78.4363		VGPKFRGV	Protein AAR2 homolog OS=Mus musculus OX=10090 GN=Aar2 PE=1 SV=3	Aar2	10207592	8	7.00892	285	45.4545
TSYRFLAL	HAUS augmin-like complex subunit 3 OS=Mus musculus OX=10090 GN=Haus3 PE=1 SV=1	Haus3	28351016	8	7.45257	1243	78.3733		YFDDLDNQIKKM	Cyclin-dependent kinase 1 OS=Mus musculus OX=10090 GN=Cdk1 PE=1 SV=3	Cdk1	10187212	12	7.00806	284	45.2951
RLMVHTVATF	Spectrin alpha chain, non-erythrocytic 1 OS=Mus musculus OX=10090 GN=Sptan1 PE=1 SV=4	Sptan1	28343557	10	7.45245	1242	78.3102		SLEDPQTHS	Heat shock protein HSP 90-beta OS=Mus musculus OX=10090 GN=Hsp90ab1 PE=1 SV=3	Hsp90ab1	10106423	9	7.0046	283	45.1356
GALKNTDYF	Cytosolic 5'-nucleotidase 3A OS=Mus musculus OX=10090 GN=Nt5c3a PE=1 SV=4	Nt5c3a	28250764	9	7.45103	1241	78.2472		LVSLRRCAGL	C-Jun-amino-terminal kinase-interacting protein 2 OS=Mus musculus OX=10090 GN=Mapk8ip2 PE=1 SV=1	Mapk8ip2	10072485	10	7.00314	282	44.9761
AAIVDGDRI	Serine/threonine-protein kinase MRCK beta OS=Mus musculus OX=10090 GN=Cdc42bpb PE=1 SV=2	Cdc42bpb	28224154	9	7.45062	1240	78.1841		KLPKQPVIVK	60S ribosomal protein L27a OS=Mus musculus OX=10090 GN=Rpl27a PE=1 SV=5	Rpl27a	10062322	10	7.0027	281	44.8166
VAYMNPIAM	Protein FAM133B OS=Mus musculus OX=10090 GN=Fam133b PE=1 SV=3	Fam133b	28207942	9	7.45037	1239	78.1211		GPMKSGNFGGS	Heterogeneous nuclear ribonucleoproteins A2/B1 OS=Mus musculus OX=10090 GN=Hnrnpa2b1 PE=1 SV=2	Hnrnpa2b1	10061122	11	7.00265	280	44.6571
TVKNLHLTS	Histone-lysine N-methyltransferase SETD1A OS=Mus musculus OX=10090 GN=Setd1a PE=1 SV=1	Setd1a	28072636	9	7.44828	1238	78.058		RIEEELGSKAKF	Alpha-enolase OS=Mus musculus OX=10090 GN=Eno1 PE=1 SV=3	Eno1	10059285	12	7.00257	279	44.4976
LSLENGTHTL	DNA (cytosine-5)-methyltransferase 1 OS=Mus musculus OX=10090 GN=Dnmt1 PE=1 SV=5	Dnmt1	28025536	10	7.44755	1237	77.995		SAVRPASL	Dedicator of cytokinesis protein 7 OS=Mus musculus OX=10090 GN=Dock7 PE=1 SV=3	Dock7	10053078	8	7.0023	278	44.3381
KVNVVEQEKIDK	Alpha-enolase OS=Mus musculus OX=10090 GN=Eno1 PE=1 SV=3	Eno1	27980368	12	7.44685	1236	77.9319		SAVENLNEM	N-alpha-acetyltransferase 15, NatA auxiliary subunit OS=Mus musculus OX=10090 GN=Naa15 PE=1 SV=1	Naa15	9995564	9	6.99981	277	44.1786
GDSRGGGGNFGP	Heterogeneous nuclear ribonucleoproteins A2/B1 OS=Mus musculus OX=10090 GN=Hnrnpa2b1 PE=1 SV=2	Hnrnpa2b1	27771556	12	7.4436	1235	77.8689		TKGGPDFSNLEK	NudC domain-containing protein 2 OS=Mus musculus OX=10090 GN=Nudcd2 PE=1 SV=1	Nudcd2	9937929	12	6.9973	276	44.0191
IPELNGKLTG	Glyceraldehyde-3-phosphate dehydrogenase OS=Mus musculus OX=10090 GN=Gapdh PE=1 SV=2	Gapdh	27707970	10	7.4426	1234	77.8058		KVNVVEQEKIDK	Alpha-enolase OS=Mus musculus OX=10090 GN=Eno1 PE=1 SV=3	Eno1	9936046	12	6.99721	275	43.8596
GNFGGSRNMGGP	Heterogeneous nuclear ribonucleoproteins A2/B1 OS=Mus musculus OX=10090 GN=Hnrnpa2b1 PE=1 SV=2	Hnrnpa2b1	27426938	12	7.43818	1233	77.7427		APSRNGMILKP	60S ribosomal protein L13 OS=Mus musculus OX=10090 GN=Rpl13 PE=1 SV=3	Rpl13	9784222	11	6.99053	274	43.7002
KRVLALSVETE	60S acidic ribosomal protein P0 OS=Mus musculus OX=10090 GN=Rplp0 PE=1 SV=3	Rplp0	27347749	11	7.43692	1232	77.6797		ALIMEQFI	Transmembrane protein 229B OS=Mus musculus OX=10090 GN=TMEM229B PE=2 SV=1	TMEM229B	9760302	8	6.98946	273	43.5407
GWTANMERIMK	Heat shock protein HSP 90-alpha OS=Mus musculus OX=10090 GN=Hsp90aa1 PE=1 SV=4;Heat shock protein HSP 90-beta OS=Mus musculus OX=10090 GN=Hsp90ab1 PE=1 SV=3	Hsp90aa1	2.73375e+07	11	7.43676	1231	77.6166		VNVERVLNV	Probable helicase with zinc finger domain OS=Mus musculus OX=10090 GN=Helz PE=1 SV=2	Helz	9713929	9	6.98739	272	43.3812
SIPGKDPDSP	Transmembrane glycoprotein NMB OS=Mus musculus OX=10090 GN=Gpnmb PE=1 SV=2	Gpnmb	27320982	10	7.4365	1230	77.5536		KRVLALSVETE	60S acidic ribosomal protein P0 OS=Mus musculus OX=10090 GN=Rplp0 PE=1 SV=3	Rplp0	9684835	11	6.98609	271	43.2217
LRPPKVKMEQRE	DnaJ homolog subfamily C member 8 OS=Mus musculus OX=10090 GN=Dnajc8 PE=1 SV=2	Dnajc8	27289578	12	7.436	1229	77.4905		KLAVNMVP	Tubulin beta-5 chain OS=Mus musculus OX=10090 GN=Tubb5 PE=1 SV=1;Tubulin beta-4B chain OS=Mus musculus OX=10090 GN=Tubb4b PE=1 SV=1	Tubb5	9671380	8	6.98549	270	43.0622
VSLLREVAR	26S proteasome non-ATPase regulatory subunit 5 OS=Mus musculus OX=10090 GN=Psmd5 PE=1 SV=4	Psmd5	27243294	9	7.43526	1228	77.4275		EVHTGLGELLR	Serpin H1 OS=Mus musculus OX=10090 GN=Serpinh1 PE=1 SV=3	Serpinh1	9665545	11	6.98523	269	42.9027
VGDIPGVRF	40S ribosomal protein S23 OS=Mus musculus OX=10090 GN=Rps23 PE=1 SV=3	Rps23	27228510	9	7.43502	1227	77.3644		KSITFSKL	Delta(3,5)-Delta(2,4)-dienoyl-CoA isomerase, mitochondrial OS=Mus musculus OX=10090 GN=Ech1 PE=1 SV=1	Ech1	9646078	8	6.98435	268	42.7432
AAMKNVTEL	14-3-3 protein gamma OS=Mus musculus OX=10090 GN=Ywhag PE=1 SV=2	Ywhag	27191624	9	7.43444	1226	77.3014		SSYKFNHL	Protein farnesyltransferase subunit beta OS=Mus musculus OX=10090 GN=Fntb PE=1 SV=1	Fntb	9639439	8	6.98405	267	42.5837
YIGIVKQAGLDR	Heterogeneous nuclear ribonucleoprotein F OS=Mus musculus OX=10090 GN=Hnrnpf PE=1 SV=3	Hnrnpf	27177604	12	7.43421	1225	77.2383		QQFVGDALDRT	Semaphorin-3E OS=Mus musculus OX=10090 GN=Sema3e PE=1 SV=3	Sema3e	9585721	11	6.98162	266	42.4242
RVYEFLDKL	26S proteasome non-ATPase regulatory subunit 3 OS=Mus musculus OX=10090 GN=Psmd3 PE=1 SV=3	Psmd3	27139225	9	7.4336	1224	77.1753		GVKFVNPKFP	Nucleolar protein 8 OS=Mus musculus OX=10090 GN=Nol8 PE=1 SV=2	Nol8	9584932	10	6.98159	265	42.2648
QILSDFPKL	Nucleolar GTP-binding protein 1 OS=Mus musculus OX=10090 GN=Gtpbp4 PE=1 SV=3	Gtpbp4	27118150	9	7.43326	1223	77.1122		IPELNGKLTG	Glyceraldehyde-3-phosphate dehydrogenase OS=Mus musculus OX=10090 GN=Gapdh PE=1 SV=2	Gapdh	9559549	10	6.98044	264	42.1053
GGIGTVPVGR	Elongation factor 1-alpha 1 OS=Mus musculus OX=10090 GN=Eef1a1 PE=1 SV=3	Eef1a1	27069366	10	7.43248	1222	77.0492		AAIENIEHL	Leucine-rich PPR motif-containing protein, mitochondrial OS=Mus musculus OX=10090 GN=Lrpprc PE=1 SV=2	Lrpprc	9549782	9	6.97999	263	41.9458
KVVDPFSKKDW	40S ribosomal protein S3a OS=Mus musculus OX=10090 GN=Rps3a PE=1 SV=3	Rps3a	27042096	11	7.43204	1221	76.9861		TAPVQLYK	Hermansky-Pudlak syndrome 3 protein homolog OS=Mus musculus OX=10090 GN=Hps3 PE=2 SV=2	Hps3	9543529	8	6.97971	262	41.7863
VITEEEKNFKAF	60S ribosomal protein L13 OS=Mus musculus OX=10090 GN=Rpl13 PE=1 SV=3	Rpl13	27033748	12	7.43191	1220	76.9231		VLDKLKAER	Elongation factor 1-alpha 1 OS=Mus musculus OX=10090 GN=Eef1a1 PE=1 SV=3	Eef1a1	9537799	9	6.97945	261	41.6268
VGPRYTQL	Mitogen-activated protein kinase 3 OS=Mus musculus OX=10090 GN=Mapk3 PE=1 SV=5	Mapk3	26910092	8	7.42992	1219	76.86		KIITYRNL	PCI domain-containing protein 2 OS=Mus musculus OX=10090 GN=Pcid2 PE=1 SV=1	Pcid2	9535273	8	6.97933	260	41.4673
RLTKHEEKLKTK	60S ribosomal protein L35 OS=Mus musculus OX=10090 GN=Rpl35 PE=1 SV=1	Rpl35	26873786	12	7.42933	1218	76.797		GQVVIIHML	AP-3 complex subunit beta-1 OS=Mus musculus OX=10090 GN=Ap3b1 PE=1 SV=2	Ap3b1	9453729	9	6.9756	259	41.3078
RNFIFSRL	Lymphocyte-specific helicase OS=Mus musculus OX=10090 GN=Hells PE=1 SV=2	Hells	26813678	8	7.42836	1217	76.7339		FSETGAGKHVP	Tubulin alpha-1B chain OS=Mus musculus OX=10090 GN=Tuba1b PE=1 SV=2	Tuba1b	9434847	11	6.97473	258	41.1483
RGNGLIKVNGRP	40S ribosomal protein S16 OS=Mus musculus OX=10090 GN=Rps16 PE=1 SV=4	Rps16	26785938	12	7.42791	1216	76.6709		SLVRKIVER	Trifunctional purine biosynthetic protein adenosine-3 OS=Mus musculus OX=10090 GN=Gart PE=1 SV=3	Gart	9376804	9	6.97205	257	40.9888
PKFEVIDKPQS	ATP synthase-coupling factor 6, mitochondrial OS=Mus musculus OX=10090 GN=Atp5pf PE=1 SV=1	Atp5pf	26767112	11	7.4276	1215	76.6078		GAIQVLPKM	Voltage-gated potassium channel subunit beta-1 OS=Mus musculus OX=10090 GN=Kcnab1 PE=1 SV=2	Kcnab1	9355422	9	6.97106	256	40.8293
FHWEQDQIAHM	ATP-binding cassette sub-family F member 2 OS=Mus musculus OX=10090 GN=Abcf2 PE=1 SV=1	Abcf2	26663284	11	7.42591	1214	76.5448		FVKELSEA	Glycine--tRNA ligase OS=Mus musculus OX=10090 GN=Gars1 PE=1 SV=1	Gars1	9313895	8	6.96913	255	40.6699
GLRNVQAEEMVE	ATP synthase subunit alpha, mitochondrial OS=Mus musculus OX=10090 GN=Atp5f1a PE=1 SV=1	Atp5f1a	26576486	12	7.4245	1213	76.4817		GQLSNGDHHFM	YTH domain-containing family protein 1 OS=Mus musculus OX=10090 GN=Ythdf1 PE=1 SV=1	Ythdf1	9288756	11	6.96796	254	40.5104
AMADTFLEHM	Pyruvate kinase PKM OS=Mus musculus OX=10090 GN=Pkm PE=1 SV=4	Pkm	26556742	10	7.42417	1212	76.4187		AALENDKTI	WD repeat-containing protein 5B OS=Mus musculus OX=10090 GN=Wdr5b PE=1 SV=1	Wdr5b	9270609	9	6.96711	253	40.3509
EAVVISGRKLA	Bifunctional methylenetetrahydrofolate dehydrogenase/cyclohydrolase, mitochondrial OS=Mus musculus OX=10090 GN=Mthfd2 PE=1 SV=1	Mthfd2	26506824	11	7.42336	1211	76.3556		AAGVGDMVM	60S ribosomal protein L23 OS=Mus musculus OX=10090 GN=Rpl23 PE=1 SV=1	Rpl23	9208406	9	6.96418	252	40.1914
EVHTGLGELLR	Serpin H1 OS=Mus musculus OX=10090 GN=Serpinh1 PE=1 SV=3	Serpinh1	26316696	11	7.42023	1210	76.2926		SLEDPQTH	Heat shock protein HSP 90-alpha OS=Mus musculus OX=10090 GN=Hsp90aa1 PE=1 SV=4;Heat shock protein HSP 90-beta OS=Mus musculus OX=10090 GN=Hsp90ab1 PE=1 SV=3	Hsp90aa1	9178259	8	6.96276	251	40.0319
LMKEILDKKVEK	Heat shock protein HSP 90-beta OS=Mus musculus OX=10090 GN=Hsp90ab1 PE=1 SV=3	Hsp90ab1	2.63135e+07	12	7.42018	1209	76.2295		AMADTFLEHM	Pyruvate kinase PKM OS=Mus musculus OX=10090 GN=Pkm PE=1 SV=4	Pkm	9.15874e+06	10	6.96184	250	39.8724
SQISNTEFL	BRISC complex subunit Abraxas 2 OS=Mus musculus OX=10090 GN=Abraxas2 PE=1 SV=1	Abraxas2	26239344	9	7.41895	1208	76.1665		VQLTVREAINQ	Pyruvate dehydrogenase E1 component subunit beta, mitochondrial OS=Mus musculus OX=10090 GN=Pdhb PE=1 SV=1	Pdhb	9134651	11	6.96069	249	39.7129
SIANFTNV	ATP-citrate synthase OS=Mus musculus OX=10090 GN=Acly PE=1 SV=1	Acly	26127546	8	7.4171	1207	76.1034		YAVSELAGH	60S ribosomal protein L4 OS=Mus musculus OX=10090 GN=Rpl4 PE=1 SV=3	Rpl4	9107801	9	6.95941	248	39.5534
VIPELNGK	Glyceraldehyde-3-phosphate dehydrogenase OS=Mus musculus OX=10090 GN=Gapdh PE=1 SV=2	Gapdh	26044116	8	7.41571	1206	76.0404		SQYRFEHL	GTP-binding protein 2 OS=Mus musculus OX=10090 GN=Gtpbp2 PE=1 SV=1	Gtpbp2	8948983	8	6.95177	247	39.3939
REPDTFMDQKI	Cadherin-1 OS=Mus musculus OX=10090 GN=Cdh1 PE=1 SV=1	Cdh1	25875711	11	7.41289	1205	75.9773		GMANLLTGPK	Synaptic vesicle membrane protein VAT-1 homolog OS=Mus musculus OX=10090 GN=Vat1 PE=1 SV=3	Vat1	8905057	10	6.94964	246	39.2344
LNGKLTGMAF	Glyceraldehyde-3-phosphate dehydrogenase OS=Mus musculus OX=10090 GN=Gapdh PE=1 SV=2	Gapdh	25857648	10	7.41259	1204	75.9142		SAISNLDYI	Guanine nucleotide exchange factor VAV3 OS=Mus musculus OX=10090 GN=Vav3 PE=1 SV=2	Vav3	8810934	9	6.94502	245	39.075
MLDKLTGVF	40S ribosomal protein S4, X isoform OS=Mus musculus OX=10090 GN=Rps4x PE=1 SV=2	Rps4x	25824400	9	7.41203	1203	75.8512		SIVSYNHL	Inositol-3-phosphate synthase 1 OS=Mus musculus OX=10090 GN=Isyna1 PE=1 SV=1	Isyna1	8809498	8	6.94495	244	38.9155
GGNVLGPKSVA	60S ribosomal protein L7a OS=Mus musculus OX=10090 GN=Rpl7a PE=1 SV=2	Rpl7a	25789998	11	7.41145	1202	75.7881		VGITYQHI	Eukaryotic translation initiation factor 3 subunit K OS=Mus musculus OX=10090 GN=Eif3k PE=1 SV=1	Eif3k	8760445	8	6.94253	243	38.756
[truncated: 1,201 more rows]
