# Supplementary material for: Dendritic cell-mediated cross presentation of tumor-derived peptides is biased against plasma membrane proteins
Source: HighWire-hosted journal article supplement (doi:10.1136/jitc-2021-004159), 2022-07-01
Supplement: jitc-2021-004159supp003_data_supplement.xlsx [file jitc-2021-004159supp003_data_supplement.xlsx]

## Sheet: Sheet1
Supplementary Data 3. pMHCs from B16F10 B2M KO SILAC-labeled cells + DCs in cross presentation study.
DCs endogenous pMHCs						SILAC-labeled cross presented pMHCs on DCs
Sequence	Protein	Gene	Length			Sequence	Protein	Gene	Length
AAAQGEGKAGG	N/A	N/A	11			AAAQIGNSF	Glycine--tRNA ligase OS=Mus musculus OX=10090 GN=Gars1 PE=1 SV=1	GARS1	9
AAAQRDAVD	Brefeldin A-inhibited guanine nucleotide-exchange protein 1 OS=Mus musculus OX=10090 GN=Arfgef1 PE=1 SV=1	ARFGEF1	9			AAGGGGGGGRYY	Heterogeneous nuclear ribonucleoprotein L OS=Mus musculus OX=10090 GN=Hnrnpl PE=1 SV=2	HNRNPL	12
AADGKGVVVVM	60S ribosomal protein L28 OS=Mus musculus OX=10090 GN=Rpl28 PE=1 SV=2	RPL28	11			AAKNVVSQF	Cytochrome b-c1 complex subunit Rieske, mitochondrial OS=Mus musculus OX=10090 GN=Uqcrfs1 PE=1 SV=1	UQCRFS1	9
AAGAGKVTK	Elongation factor 1-alpha 1 OS=Mus musculus OX=10090 GN=Eef1a1 PE=1 SV=3	EEF1A1	9			AATATANQIILK	Muscleblind-like protein 2 OS=Mus musculus OX=10090 GN=Mbnl2 PE=2 SV=2	MBNL2	12
AAGGPCVRSSR	Nucleoporin NUP188 homolog OS=Mus musculus OX=10090 GN=Nup188 PE=1 SV=2	NUP188	11			ADDFVRSS	Serpin H1 OS=Mus musculus OX=10090 GN=Serpinh1 PE=1 SV=3	SERPINH1	8
AANIVGEGEP	Titin OS=Mus musculus OX=10090 GN=Ttn PE=1 SV=1	TTN	10			ADGIVSKNF	40S ribosomal protein S21 OS=Mus musculus OX=10090 GN=Rps21 PE=1 SV=1	RPS21	9
AAPRQPGLMA	Coiled-coil-helix-coiled-coil-helix domain-containing protein 2 OS=Mus musculus OX=10090 GN=Chchd2 PE=2 SV=1	CHCHD2	10			AEGIHTGQFVY	60S ribosomal protein L8 OS=Mus musculus OX=10090 GN=Rpl8 PE=1 SV=2	RPL8	11
ADKLLISL	Centrosomal protein of 290 kDa OS=Mus musculus OX=10090 GN=Cep290 PE=1 SV=2	CEP290	8			AEVVSTCDITF	Putative oxidoreductase GLYR1 OS=Mus musculus OX=10090 GN=Glyr1 PE=1 SV=1	GLYR1	11
AFAVLLGLGLG	Tumor necrosis factor receptor superfamily member 4 OS=Mus musculus OX=10090 GN=Tnfrsf4 PE=1 SV=1	TNFRSF4	11			AGGGGGGGRYY	Heterogeneous nuclear ribonucleoprotein L OS=Mus musculus OX=10090 GN=Hnrnpl PE=1 SV=2	HNRNPL	11
AGATVIALIHF	Neuronal membrane glycoprotein M6-b OS=Mus musculus OX=10090 GN=Gpm6b PE=1 SV=2	GPM6B	11			AGLQFPVGRVH	Histone H2A type 2-B OS=Mus musculus OX=10090 GN=Hist2h2ab PE=1 SV=3	HIST2H2AB	11
AGHQTSAESW	60S ribosomal protein L4 OS=Mus musculus OX=10090 GN=Rpl4 PE=1 SV=3	RPL4	10			AGRVYISK	Regulator of microtubule dynamics protein 3 OS=Mus musculus OX=10090 GN=Rmdn3 PE=1 SV=2	RMDN3	8
AGKVRGQTP	40S ribosomal protein S30 OS=Mus musculus OX=10090 GN=Fau PE=1 SV=1	FAU	9			AGSVISYPLEN	Renin receptor OS=Mus musculus OX=10090 GN=Atp6ap2 PE=1 SV=2	ATP6AP2	11
AGYTSFQIT	Dynein heavy chain 5, axonemal OS=Mus musculus OX=10090 GN=Dnah5 PE=1 SV=2	DNAH5	9			AIKKKDELERVA	40S ribosomal protein S5 OS=Mus musculus OX=10090 GN=Rps5 PE=1 SV=3	RPS5	12
AITAKLLQQKLS	Histone deacetylase 5 OS=Mus musculus OX=10090 GN=Hdac5 PE=1 SV=2	HDAC5	12			AIRVTNPNAR	60S ribosomal protein L32 OS=Mus musculus OX=10090 GN=Rpl32 PE=1 SV=2	RPL32	10
AKGWLRDP	Vinculin OS=Mus musculus OX=10090 GN=Vcl PE=1 SV=4	VCL	8			AITAIKGVGRRY	40S ribosomal protein S18 OS=Mus musculus OX=10090 GN=Rps18 PE=1 SV=3	RPS18	12
ALPHGVQGPQ	Inactive histone-lysine N-methyltransferase 2E OS=Mus musculus OX=10090 GN=Kmt2e PE=1 SV=2	KMT2E	10			AKDIGFIKLD	40S ribosomal protein S29 OS=Mus musculus OX=10090 GN=Rps29 PE=1 SV=2	RPS29	10
AMIDDTVVI	Ankyrin-2 OS=Mus musculus OX=10090 GN=Ank2 PE=1 SV=2	ANK2	9			AKDVKFGADA	60 kDa heat shock protein, mitochondrial OS=Mus musculus OX=10090 GN=Hspd1 PE=1 SV=1	HSPD1	10
ANILVTEENK	E3 ubiquitin-protein ligase HUWE1 OS=Mus musculus OX=10090 GN=Huwe1 PE=1 SV=5	HUWE1	10			AKDVKFGADAR	60 kDa heat shock protein, mitochondrial OS=Mus musculus OX=10090 GN=Hspd1 PE=1 SV=1	HSPD1	11
APIDRVGQTIE	Heterogeneous nuclear ribonucleoprotein M OS=Mus musculus OX=10090 GN=Hnrnpm PE=1 SV=3	HNRNPM	11			AKGGKIGLF	ATP synthase subunit beta, mitochondrial OS=Mus musculus OX=10090 GN=Atp5f1b PE=1 SV=2	ATP5F1B	9
AQGALYVHSPA	RAS guanyl-releasing protein 1 OS=Mus musculus OX=10090 GN=Rasgrp1 PE=1 SV=1	RASGRP1	11			ALGAGIER	Heterogeneous nuclear ribonucleoprotein M OS=Mus musculus OX=10090 GN=Hnrnpm PE=1 SV=3	HNRNPM	8
AQGLKDGYRLVV	Histidine triad nucleotide-binding protein 2, mitochondrial OS=Mus musculus OX=10090 GN=Hint2 PE=1 SV=1	HINT2	12			ALGEEWKGY	40S ribosomal protein S6 OS=Mus musculus OX=10090 GN=Rps6 PE=1 SV=1	RPS6	9
AQGLSTML	Calcium-activated potassium channel subunit alpha-1 OS=Mus musculus OX=10090 GN=Kcnma1 PE=1 SV=2	KCNMA1	8			ALRDNSTMGY	Heat shock protein HSP 90-alpha OS=Mus musculus OX=10090 GN=Hsp90aa1 PE=1 SV=4;Heat shock protein HSP 90-beta OS=Mus musculus OX=10090 GN=Hsp90ab1 PE=1 SV=3	HSP90AA1	10
AQVLDRIFL	Neuronal acetylcholine receptor subunit beta-3 OS=Mus musculus OX=10090 GN=Chrnb3 PE=2 SV=1	CHRNB3	9			AMTVPFVR	Trifunctional enzyme subunit alpha, mitochondrial OS=Mus musculus OX=10090 GN=Hadha PE=1 SV=1	HADHA	8
ARDLLPMKP	Protein FAM91A1 OS=Mus musculus OX=10090 GN=Fam91a1 PE=1 SV=1	FAM91A1	9			AMVALQFP	DNA helicase B OS=Mus musculus OX=10090 GN=Helb PE=1 SV=2	HELB	8
ARGGRSGGGP	Serine/threonine-protein phosphatase 1 regulatory subunit 10 OS=Mus musculus OX=10090 GN=Ppp1r10 PE=1 SV=1	PPP1R10	10			APPREAHF	60S ribosomal protein L21 OS=Mus musculus OX=10090 GN=Rpl21 PE=1 SV=3	RPL21	8
ARGSYNIKSR	Rho GDP-dissociation inhibitor 1 OS=Mus musculus OX=10090 GN=Arhgdia PE=1 SV=3	ARHGDIA	10			APSAGLPSQKP	Ran-binding protein 3 OS=Mus musculus OX=10090 GN=Ranbp3 PE=1 SV=2	RANBP3	11
ARMAEPSF	Erythropoietin receptor OS=Mus musculus OX=10090 GN=Epor PE=1 SV=1	EPOR	8			APSRNGMILKP	60S ribosomal protein L13 OS=Mus musculus OX=10090 GN=Rpl13 PE=1 SV=3	RPL13	11
ASKIPEGSAVP	Septin-9 OS=Mus musculus OX=10090 GN=Septin9 PE=1 SV=1	SEPTIN9	11			APVNVTTEVK	Elongation factor 1-alpha 1 OS=Mus musculus OX=10090 GN=Eef1a1 PE=1 SV=3	EEF1A1	10
ATERAKATP	Treacle protein OS=Mus musculus OX=10090 GN=Tcof1 PE=1 SV=1	TCOF1	9			AQALRDNSTMGY	Heat shock protein HSP 90-alpha OS=Mus musculus OX=10090 GN=Hsp90aa1 PE=1 SV=4;Heat shock protein HSP 90-beta OS=Mus musculus OX=10090 GN=Hsp90ab1 PE=1 SV=3	HSP90AA1	12
ATEWVGATTEWS	40S ribosomal protein SA OS=Mus musculus OX=10090 GN=Rpsa PE=1 SV=4	RPSA	12			AQINQGESITH	Adenylyl cyclase-associated protein 1 OS=Mus musculus OX=10090 GN=Cap1 PE=1 SV=4	CAP1	11
ATGFSFGSG	Nucleoporin p58/p45 OS=Mus musculus OX=10090 GN=Nup58 PE=1 SV=1	NUP58	9			AQINQGESITHA	Adenylyl cyclase-associated protein 1 OS=Mus musculus OX=10090 GN=Cap1 PE=1 SV=4	CAP1	12
ATLLRKAGA	Rotatin OS=Mus musculus OX=10090 GN=Rttn PE=1 SV=2	RTTN	9			AQVMSLSTIL	Nuclear receptor subfamily 2 group C member 2 OS=Mus musculus OX=10090 GN=Nr2c2 PE=1 SV=1	NR2C2	10
ATLQPLAP	POU domain class 2-associating factor 1 OS=Mus musculus OX=10090 GN=Pou2af1 PE=1 SV=2	POU2AF1	8			ARDIAKNQL	Coiled-coil domain-containing protein 151 OS=Mus musculus OX=10090 GN=Ccdc151 PE=2 SV=1	CCDC151	9
ATMLHVELP	GPN-loop GTPase 2 OS=Mus musculus OX=10090 GN=Gpn2 PE=2 SV=2	GPN2	9			AREIFDSRGNP	Alpha-enolase OS=Mus musculus OX=10090 GN=Eno1 PE=1 SV=3	ENO1	11
ATQVRIQTVP	Nuclear factor related to kappa-B-binding protein OS=Mus musculus OX=10090 GN=Nfrkb PE=1 SV=1	NFRKB	10			ARGCAYPAPYL	E3 ubiquitin-protein ligase UBR1 OS=Mus musculus OX=10090 GN=Ubr1 PE=1 SV=2	UBR1	11
ATSDRGVRSRAS	KN motif and ankyrin repeat domain-containing protein 3 OS=Mus musculus OX=10090 GN=Kank3 PE=1 SV=1	KANK3	12			ARTDEIGVAF	Glycine--tRNA ligase OS=Mus musculus OX=10090 GN=Gars1 PE=1 SV=1	GARS1	10
AVAVPKVP	Ribosomal RNA processing protein 1 homolog B OS=Mus musculus OX=10090 GN=Rrp1b PE=1 SV=2	RRP1B	8			ASGPPVSELITK	Histone H1.2 OS=Mus musculus OX=10090 GN=H1-2 PE=1 SV=2	H1-2	12
AVGDIPGVR	40S ribosomal protein S23 OS=Mus musculus OX=10090 GN=Rps23 PE=1 SV=3	RPS23	9			ASGYLLML	Protein patched homolog 1 OS=Mus musculus OX=10090 GN=Ptch1 PE=1 SV=1	PTCH1	8
AVHDSRAG	N/A	N/A	8			ASQKKTFEINP	Endoplasmin OS=Mus musculus OX=10090 GN=Hsp90b1 PE=1 SV=2	HSP90B1	11
AVLCASAR	Leucine-rich repeat-containing G-protein coupled receptor 6 OS=Mus musculus OX=10090 GN=Lgr6 PE=2 SV=1	LGR6	8			ATGVMLCAAR	39S ribosomal protein L40, mitochondrial OS=Mus musculus OX=10090 GN=Mrpl40 PE=1 SV=2	MRPL40	10
AVTVAPPGAR	Heterogeneous nuclear ribonucleoprotein U OS=Mus musculus OX=10090 GN=Hnrnpu PE=1 SV=1	HNRNPU	10			AVEAKKTY	Elongation factor Tu, mitochondrial OS=Mus musculus OX=10090 GN=Tufm PE=1 SV=1	TUFM	8
CITPIQLAPM	Serine/threonine-protein kinase PAK 5 OS=Mus musculus OX=10090 GN=Pak5 PE=1 SV=1	PAK5	10			AVGDIPGVRF	40S ribosomal protein S23 OS=Mus musculus OX=10090 GN=Rps23 PE=1 SV=3	RPS23	10
CPPGVPLVLD	WNT1-inducible-signaling pathway protein 2 OS=Mus musculus OX=10090 GN=Wisp2 PE=2 SV=1	WISP2	10			AVKKTLNI	Pyruvate dehydrogenase E1 component subunit beta, mitochondrial OS=Mus musculus OX=10090 GN=Pdhb PE=1 SV=1	PDHB	8
DAREAIIP	N/A	N/A	8			AVLSAEKLRDE	Serpin H1 OS=Mus musculus OX=10090 GN=Serpinh1 PE=1 SV=3	SERPINH1	11
DHVLVEMGY	Tudor domain-containing protein 1 OS=Mus musculus OX=10090 GN=Tdrd1 PE=1 SV=2	TDRD1	9			AVSEGTKAVTKY	Histone H2B type 1-B OS=Mus musculus OX=10090 GN=Hist1h2bb PE=1 SV=3;Histone H2B type 2-B OS=Mus musculus OX=10090 GN=Hist2h2bb PE=1 SV=3;Histone H2B type 1-F/J/L OS=Mus musculus OX=10090 GN=H2bc7 PE=1 SV=2	HIST1H2BB	12
DLGERMEV	Contactin-associated protein-like 4 OS=Mus musculus OX=10090 GN=Cntnap4 PE=1 SV=2	CNTNAP4	8			AVSRMEQDEY	Trifunctional enzyme subunit beta, mitochondrial OS=Mus musculus OX=10090 GN=Hadhb PE=1 SV=1	HADHB	10
DPRRTAVTT	Active breakpoint cluster region-related protein OS=Mus musculus OX=10090 GN=Abr PE=1 SV=1	ABR	9			AVTKEGQVVRN	28S ribosomal protein S26, mitochondrial OS=Mus musculus OX=10090 GN=Mrps26 PE=1 SV=1	MRPS26	11
DTGISSKAMGIM	Histone H2B type 1-B OS=Mus musculus OX=10090 GN=Hist1h2bb PE=1 SV=3;Histone H2B type 2-B OS=Mus musculus OX=10090 GN=Hist2h2bb PE=1 SV=3;Histone H2B type 3-B OS=Mus musculus OX=10090 GN=Hist3h2bb PE=1 SV=3;Histone H2B type 1-F/J/L OS=Mus musculus OX=10090 GN=H2bc7 PE=1 SV=2	HIST1H2BB	12			AYFHEEDETSF	Eukaryotic translation initiation factor 3 subunit D OS=Mus musculus OX=10090 GN=Eif3d PE=1 SV=2	EIF3D	11
DTLFCLTSI	Trace amine-associated receptor 5 OS=Mus musculus OX=10090 GN=Taar5 PE=2 SV=1	TAAR5	9			AYQTGKDISTNY	Endoplasmin OS=Mus musculus OX=10090 GN=Hsp90b1 PE=1 SV=2	HSP90B1	12
DTVEITTTTP	PHD and RING finger domain-containing protein 1 OS=Mus musculus OX=10090 GN=Phrf1 PE=1 SV=2	PHRF1	10			DAGAGIALNDN	Glyceraldehyde-3-phosphate dehydrogenase OS=Mus musculus OX=10090 GN=Gapdh PE=1 SV=2	GAPDH	11
DVQIFNSSS	Mucin-19 OS=Mus musculus OX=10090 GN=Muc19 PE=2 SV=2	MUC19	9			DAGAGIALNDNF	Glyceraldehyde-3-phosphate dehydrogenase OS=Mus musculus OX=10090 GN=Gapdh PE=1 SV=2	GAPDH	12
DVQLQESG	Ig heavy chain V region MOPC 315 OS=Mus musculus OX=10090 PE=1 SV=2	N/A	8			DDRAYSSF	Eukaryotic translation initiation factor 4H OS=Mus musculus OX=10090 GN=Eif4h PE=1 SV=3	EIF4H	8
EAEQGRVHVVYR	A disintegrin and metalloproteinase with thrombospondin motifs 2 OS=Mus musculus OX=10090 GN=Adamts2 PE=1 SV=2	ADAMTS2	12			DEEGVRYVP	Histone deacetylase complex subunit SAP130 OS=Mus musculus OX=10090 GN=Sap130 PE=1 SV=2	SAP130	9
EAKVLSVPRR	Tissue factor OS=Mus musculus OX=10090 GN=F3 PE=1 SV=2	F3	10			DGQVINETSQH	Vimentin OS=Mus musculus OX=10090 GN=Vim PE=1 SV=3	VIM	11
EDSSSPRVVP	Receptor-type tyrosine-protein phosphatase gamma OS=Mus musculus OX=10090 GN=Ptprg PE=1 SV=1	PTPRG	10			DLLLCVGNF	CWF19-like protein 1 OS=Mus musculus OX=10090 GN=Cwf19l1 PE=1 SV=2	CWF19L1	9
EGQGDYALNV	Aminopeptidase N OS=Mus musculus OX=10090 GN=Anpep PE=1 SV=4	ANPEP	10			DLQHGSLF	L-lactate dehydrogenase B chain OS=Mus musculus OX=10090 GN=Ldhb PE=1 SV=2;L-lactate dehydrogenase A chain OS=Mus musculus OX=10090 GN=Ldha PE=1 SV=3	LDHB	8
EITRHQVQ	RIMS-binding protein 3 OS=Mus musculus OX=10090 GN=Rimbp3 PE=1 SV=2	RIMBP3	8			DLTWTTATP	Fibroblast growth factor receptor 4 OS=Mus musculus OX=10090 GN=Fgfr4 PE=1 SV=3	FGFR4	9
EPPALPRTGR	DNA topoisomerase 2-beta OS=Mus musculus OX=10090 GN=Top2b PE=1 SV=2	TOP2B	10			DLYVSDSTP	UPF0669 protein C6orf120 homolog OS=Mus musculus OX=10090 PE=2 SV=1	?	9
ESILGGVLK	Dedicator of cytokinesis protein 7 OS=Mus musculus OX=10090 GN=Dock7 PE=1 SV=3	DOCK7	9			DRYDGMVGF	Heterogeneous nuclear ribonucleoprotein K OS=Mus musculus OX=10090 GN=Hnrnpk PE=1 SV=1	HNRNPK	9
EVSGIPKPDVG	Myosin light chain kinase, smooth muscle OS=Mus musculus OX=10090 GN=Mylk PE=1 SV=3	MYLK	11			DVKAPAMF	40S ribosomal protein S3a OS=Mus musculus OX=10090 GN=Rps3a PE=1 SV=3	RPS3A	8
EVSVTWMP	Macrophage colony-stimulating factor 1 receptor OS=Mus musculus OX=10090 GN=Csf1r PE=1 SV=3	CSF1R	8			DVNAAIATIK	Tubulin alpha-1A chain OS=Mus musculus OX=10090 GN=Tuba1a PE=1 SV=1	TUBA1A	10
EVVMIYDAEK	DAZ-associated protein 1 OS=Mus musculus OX=10090 GN=Dazap1 PE=1 SV=2	DAZAP1	10			EAQLDYLAPF	Dynein regulatory complex subunit 7 OS=Mus musculus OX=10090 GN=Drc7 PE=1 SV=4	DRC7	10
FGGSGTSSRP	Vimentin OS=Mus musculus OX=10090 GN=Vim PE=1 SV=3	VIM	10			EDPQTHSNRIY	Heat shock protein HSP 90-beta OS=Mus musculus OX=10090 GN=Hsp90ab1 PE=1 SV=3	HSP90AB1	11
FGIQSSSSPL	DNA-directed RNA polymerase I subunit RPA1 OS=Mus musculus OX=10090 GN=Polr1a PE=1 SV=2	POLR1A	10			EELKTHVP	EF-hand calcium-binding domain-containing protein 5 OS=Mus musculus OX=10090 GN=Efcab5 PE=1 SV=2	EFCAB5	8
FGKPLAPAASA	Nuclear envelope pore membrane protein POM 121 OS=Mus musculus OX=10090 GN=Pom121 PE=1 SV=2	POM121	11			EGFVREEEDRA	Potassium voltage-gated channel subfamily A member 4 OS=Mus musculus OX=10090 GN=Kcna4 PE=1 SV=2	KCNA4	11
FLKEMSLT	Hydrocephalus-inducing protein OS=Mus musculus OX=10090 GN=Hydin PE=1 SV=2	HYDIN	8			EHTQQLSFL	Interferon-induced very large GTPase 1 OS=Mus musculus OX=10090 GN=Gvin1 PE=1 SV=1	GVIN1	9
FLKMETVT	Cytotoxic and regulatory T-cell molecule OS=Mus musculus OX=10090 GN=Crtam PE=1 SV=2	CRTAM	8			EISPGNLMVVQ	Phosphoinositide 3-kinase adapter protein 1 OS=Mus musculus OX=10090 GN=Pik3ap1 PE=1 SV=1	PIK3AP1	11
FLLSGRSM	Nucleolar protein 14 OS=Mus musculus OX=10090 GN=Nop14 PE=1 SV=2	NOP14	8			ERPTYTNL	Tubulin alpha-8 chain OS=Mus musculus OX=10090 GN=Tuba8 PE=1 SV=1;Tubulin alpha-1A chain OS=Mus musculus OX=10090 GN=Tuba1a PE=1 SV=1	TUBA8	8
FLQALGLG	Neuromedin-U receptor 1 OS=Mus musculus OX=10090 GN=Nmur1 PE=2 SV=2	NMUR1	8			EVEQKKKRTF	40S ribosomal protein S15 OS=Mus musculus OX=10090 GN=Rps15 PE=1 SV=2	RPS15	10
FLQGATIT	Rab-3A-interacting protein OS=Mus musculus OX=10090 GN=Rab3ip PE=1 SV=1	RAB3IP	8			EVFKTASQP	Focadhesin OS=Mus musculus OX=10090 GN=Focad PE=1 SV=1	FOCAD	9
FLQSLGETA	Collagen alpha-4(VI) chain OS=Mus musculus OX=10090 GN=Col6a4 PE=1 SV=2	COL6A4	9			EVRFFDEESY	Translocon-associated protein subunit delta OS=Mus musculus OX=10090 GN=Ssr4 PE=1 SV=1	SSR4	10
FLSFMNLT	Wings apart-like protein homolog OS=Mus musculus OX=10090 GN=Wapl PE=1 SV=2	WAPL	8			EYDESGPSIVH	Actin, cytoplasmic 1 OS=Mus musculus OX=10090 GN=Actb PE=1 SV=1	ACTB	11
FNPPDLDIMDR	Sarcoplasmic/endoplasmic reticulum calcium ATPase 1 OS=Mus musculus OX=10090 GN=Atp2a1 PE=1 SV=1	ATP2A1	11			FAAAQIGNSF	Glycine--tRNA ligase OS=Mus musculus OX=10090 GN=Gars1 PE=1 SV=1	GARS1	10
GCYKSLPSRNGP	Putative ATP-dependent RNA helicase TDRD12 OS=Mus musculus OX=10090 GN=Tdrd12 PE=1 SV=2	TDRD12	12			FADDFVRS	Serpin H1 OS=Mus musculus OX=10090 GN=Serpinh1 PE=1 SV=3	SERPINH1	8
GDGIARVH	ATP synthase subunit alpha, mitochondrial OS=Mus musculus OX=10090 GN=Atp5f1a PE=1 SV=1	ATP5F1A	8			FADDFVRSS	Serpin H1 OS=Mus musculus OX=10090 GN=Serpinh1 PE=1 SV=3	SERPINH1	9
GDRVLIGSVQPG	Centrosome-associated protein 350 OS=Mus musculus OX=10090 GN=Cep350 PE=1 SV=1	CEP350	12			FADDFVRSSK	Serpin H1 OS=Mus musculus OX=10090 GN=Serpinh1 PE=1 SV=3	SERPINH1	10
GFLTPPAPVP	Serine/threonine-protein kinase WNK1 OS=Mus musculus OX=10090 GN=Wnk1 PE=1 SV=2	WNK1	10			FAENDISSR	RNA-binding protein NOB1 OS=Mus musculus OX=10090 GN=Nob1 PE=1 SV=1	NOB1	9
GGIGTVPVGR	Elongation factor 1-alpha 1 OS=Mus musculus OX=10090 GN=Eef1a1 PE=1 SV=3	EEF1A1	10			FAPVNVTTEVK	Elongation factor 1-alpha 1 OS=Mus musculus OX=10090 GN=Eef1a1 PE=1 SV=3	EEF1A1	11
GGSGTSSRP	Vimentin OS=Mus musculus OX=10090 GN=Vim PE=1 SV=3	VIM	9			FEYIEENKY	Heterogeneous nuclear ribonucleoprotein U OS=Mus musculus OX=10090 GN=Hnrnpu PE=1 SV=1	HNRNPU	9
GGSRYPGQGSP	Major prion protein OS=Mus musculus OX=10090 GN=Prnp PE=1 SV=2	PRNP	11			FGGGMENMGR	Heterogeneous nuclear ribonucleoprotein M OS=Mus musculus OX=10090 GN=Hnrnpm PE=1 SV=3	HNRNPM	10
GHPPPPPP	Heterogeneous nuclear ribonucleoprotein L OS=Mus musculus OX=10090 GN=Hnrnpl PE=1 SV=2	HNRNPL	8			FGGRSSGP	Heterogeneous nuclear ribonucleoprotein A1 OS=Mus musculus OX=10090 GN=Hnrnpa1 PE=1 SV=2	HNRNPA1	8
GIGQDIQPK	60S ribosomal protein L7a OS=Mus musculus OX=10090 GN=Rpl7a PE=1 SV=2	RPL7A	9			FGGSGTSSRP	Vimentin OS=Mus musculus OX=10090 GN=Vim PE=1 SV=3	VIM	10
GKDCNERIVPTD	Phospholipase DDHD2 OS=Mus musculus OX=10090 GN=Ddhd2 PE=1 SV=3	DDHD2	12			FGGSGTSSRPS	Vimentin OS=Mus musculus OX=10090 GN=Vim PE=1 SV=3	VIM	11
GKLARAPADLG	Serine/threonine-protein kinase PLK1 OS=Mus musculus OX=10090 GN=Plk1 PE=1 SV=2	PLK1	11			FGGSGTSSRPSS	Vimentin OS=Mus musculus OX=10090 GN=Vim PE=1 SV=3	VIM	12
GKSGMESFPPPP	Trinucleotide repeat-containing gene 6C protein OS=Mus musculus OX=10090 GN=Tnrc6c PE=1 SV=2	TNRC6C	12			FGGSRNMGGP	Heterogeneous nuclear ribonucleoproteins A2/B1 OS=Mus musculus OX=10090 GN=Hnrnpa2b1 PE=1 SV=2	HNRNPA2B1	10
GKVREDVTP	Protocadherin Fat 2 OS=Mus musculus OX=10090 GN=Fat2 PE=1 SV=1	FAT2	9			FGIGQDIQPK	60S ribosomal protein L7a OS=Mus musculus OX=10090 GN=Rpl7a PE=1 SV=2	RPL7A	10
GKVRGQTP	40S ribosomal protein S30 OS=Mus musculus OX=10090 GN=Fau PE=1 SV=1	FAU	8			FGQSGAGNNW	Tubulin beta-5 chain OS=Mus musculus OX=10090 GN=Tubb5 PE=1 SV=1	TUBB5	10
GLGDPRLQKG	Zinc finger CCCH domain-containing protein 4 OS=Mus musculus OX=10090 GN=Zc3h4 PE=1 SV=2	ZC3H4	10			FHEEDETSF	Eukaryotic translation initiation factor 3 subunit D OS=Mus musculus OX=10090 GN=Eif3d PE=1 SV=2	EIF3D	9
GLQKEIAEL	Fos-related antigen 2 OS=Mus musculus OX=10090 GN=Fosl2 PE=1 SV=2	FOSL2	9			FIDSANNVV	Growth/differentiation factor 5 OS=Mus musculus OX=10090 GN=Gdf5 PE=1 SV=2	GDF5	9
GNAVEEELRE	Cartilage matrix protein OS=Mus musculus OX=10090 GN=Matn1 PE=2 SV=2	MATN1	10			FIDTTSKF	60S ribosomal protein L3 OS=Mus musculus OX=10090 GN=Rpl3 PE=1 SV=3	RPL3	8
GNLHELVL	Insulin-like growth factor-binding protein complex acid labile subunit OS=Mus musculus OX=10090 GN=Igfals PE=1 SV=1	IGFALS	8			FIDTTSKFGHG	60S ribosomal protein L3 OS=Mus musculus OX=10090 GN=Rpl3 PE=1 SV=3	RPL3	11
GPSSVEDIKAK	Nucleophosmin OS=Mus musculus OX=10090 GN=Npm1 PE=1 SV=1	NPM1	11			FNPPLQQPQT	Alpha-2B adrenergic receptor OS=Mus musculus OX=10090 GN=Adra2b PE=1 SV=2	ADRA2B	10
GQLLAVHAGSM	CDK2-associated and cullin domain-containing protein 1 OS=Mus musculus OX=10090 GN=Cacul1 PE=2 SV=1	CACUL1	11			FNSNSHSSTF	Glyceraldehyde-3-phosphate dehydrogenase OS=Mus musculus OX=10090 GN=Gapdh PE=1 SV=2	GAPDH	10
GQSGADMDK	SH3 domain-binding protein 1 OS=Mus musculus OX=10090 GN=Sh3bp1 PE=1 SV=3	SH3BP1	9			FRSTVPLK	0	?	8
GRKGHAVGDIPG	40S ribosomal protein S23 OS=Mus musculus OX=10090 GN=Rps23 PE=1 SV=3	RPS23	12			FSDYPPLGR	Elongation factor 1-alpha 1 OS=Mus musculus OX=10090 GN=Eef1a1 PE=1 SV=3	EEF1A1	9
GRLTFQPGSQ	Arylsulfatase K OS=Mus musculus OX=10090 GN=Arsk PE=2 SV=2	ARSK	10			FSETGAGK	Tubulin alpha-1A chain OS=Mus musculus OX=10090 GN=Tuba1a PE=1 SV=1	TUBA1A	8
GSEDAVKARLA	Spectrin alpha chain, non-erythrocytic 1 OS=Mus musculus OX=10090 GN=Sptan1 PE=1 SV=4	SPTAN1	11			FSETGAGKHVP	Tubulin alpha-1A chain OS=Mus musculus OX=10090 GN=Tuba1a PE=1 SV=1	TUBA1A	11
GSGGERGGGP	Protein phosphatase 1 regulatory subunit 3A OS=Mus musculus OX=10090 GN=Ppp1r3a PE=1 SV=2	PPP1R3A	10			FSETGAGKHVPR	Tubulin alpha-1A chain OS=Mus musculus OX=10090 GN=Tuba1a PE=1 SV=1	TUBA1A	12
GSGVERMGP	Heterogeneous nuclear ribonucleoprotein M OS=Mus musculus OX=10090 GN=Hnrnpm PE=1 SV=3	HNRNPM	9			FSLEDPQTH	Heat shock protein HSP 90-alpha OS=Mus musculus OX=10090 GN=Hsp90aa1 PE=1 SV=4;Heat shock protein HSP 90-beta OS=Mus musculus OX=10090 GN=Hsp90ab1 PE=1 SV=3	HSP90AA1	9
GSVPEHPSPSP	Heterogeneous nuclear ribonucleoproteins C1/C2 OS=Mus musculus OX=10090 GN=Hnrnpc PE=1 SV=1	HNRNPC	11			FTDEESRVF	Bcl-2-associated transcription factor 1 OS=Mus musculus OX=10090 GN=Bclaf1 PE=1 SV=2	BCLAF1	9
GVSEGQMKQVA	Protein argonaute-4 OS=Mus musculus OX=10090 GN=Ago4 PE=2 SV=2	AGO4	11			FTEVLKTNG	60S ribosomal protein L13a OS=Mus musculus OX=10090 GN=Rpl13a PE=1 SV=4	RPL13A	9
GYFPEPVTL	Ig gamma-2A chain C region, membrane-bound form OS=Mus musculus OX=10090 GN=Igh-1a PE=1 SV=3	IGH-1A	9			FTGNVSIR	40S ribosomal protein S11 OS=Mus musculus OX=10090 GN=Rps11 PE=1 SV=3	RPS11	8
HETSGGRP	SH3 domain-containing protein 19 OS=Mus musculus OX=10090 GN=Sh3d19 PE=1 SV=2	SH3D19	8			FTGNVSIRG	40S ribosomal protein S11 OS=Mus musculus OX=10090 GN=Rps11 PE=1 SV=3	RPS11	9
HGQNPAPPPP	Zinc finger protein 414 OS=Mus musculus OX=10090 GN=Znf414 PE=2 SV=1	ZNF414	10			GASKLVPVGY	Elongation factor 1-delta OS=Mus musculus OX=10090 GN=Eef1d PE=1 SV=3	EEF1D	10
HHHHPLHP	Hairy/enhancer-of-split related with YRPW motif protein 2 OS=Mus musculus OX=10090 GN=Hey2 PE=1 SV=1	HEY2	8			GAYPTQPGQGY	RNA-binding protein FUS OS=Mus musculus OX=10090 GN=Fus PE=1 SV=1	FUS	11
HQHHRVTP	E3 ubiquitin-protein ligase TRIM50 OS=Mus musculus OX=10090 GN=Trim50 PE=1 SV=1	TRIM50	8			GDRYDGMVGF	Heterogeneous nuclear ribonucleoprotein K OS=Mus musculus OX=10090 GN=Hnrnpk PE=1 SV=1	HNRNPK	10
HTIKQAEKEA	N/A	N/A	10			GDSRGGGGNFGP	Heterogeneous nuclear ribonucleoproteins A2/B1 OS=Mus musculus OX=10090 GN=Hnrnpa2b1 PE=1 SV=2	HNRNPA2B1	12
IAVGISGAIQH	Electron transfer flavoprotein subunit alpha, mitochondrial OS=Mus musculus OX=10090 GN=Etfa PE=1 SV=2	ETFA	11			GFGDSFGR	Myelin expression factor 2 OS=Mus musculus OX=10090 GN=Myef2 PE=1 SV=1	MYEF2	8
IDRVGQTIER	Heterogeneous nuclear ribonucleoprotein M OS=Mus musculus OX=10090 GN=Hnrnpm PE=1 SV=3	HNRNPM	10			GFGDSRGGGGNF	Heterogeneous nuclear ribonucleoproteins A2/B1 OS=Mus musculus OX=10090 GN=Hnrnpa2b1 PE=1 SV=2	HNRNPA2B1	12
IENLLMRS	Sorbin and SH3 domain-containing protein 1 OS=Mus musculus OX=10090 GN=Sorbs1 PE=1 SV=2	SORBS1	8			GFGQGAGALVH	Cysteine and glycine-rich protein 1 OS=Mus musculus OX=10090 GN=Csrp1 PE=1 SV=3	CSRP1	11
IGGIGTVPVGR	Elongation factor 1-alpha 1 OS=Mus musculus OX=10090 GN=Eef1a1 PE=1 SV=3	EEF1A1	11			GFGSDRFG	Heterogeneous nuclear ribonucleoprotein H OS=Mus musculus OX=10090 GN=Hnrnph1 PE=1 SV=3	HNRNPH1	8
IGIVLPVFY	LysM and putative peptidoglycan-binding domain-containing protein 4 OS=Mus musculus OX=10090 GN=Lysmd4 PE=2 SV=1	LYSMD4	9			GFREGTTP	60S ribosomal protein L37 OS=Mus musculus OX=10090 GN=Rpl37 PE=3 SV=3	RPL37	8
IGRIEDVTP	40S ribosomal protein S14 OS=Mus musculus OX=10090 GN=Rps14 PE=1 SV=3	RPS14	9			GFTTDLFGRDLS	Heterogeneous nuclear ribonucleoprotein F OS=Mus musculus OX=10090 GN=Hnrnpf PE=1 SV=3	HNRNPF	12
IIEPIIQH	Rho GTPase-activating protein 44 OS=Mus musculus OX=10090 GN=Arhgap44 PE=1 SV=1	ARHGAP44	8			GFVKVVKN	60S ribosomal protein L5 OS=Mus musculus OX=10090 GN=Rpl5 PE=1 SV=3	RPL5	8
IKAGFLVTA	SH3 domain-containing YSC84-like protein 1 OS=Mus musculus OX=10090 GN=Sh3yl1 PE=1 SV=1	SH3YL1	9			GGAYVTRSS	Vimentin OS=Mus musculus OX=10090 GN=Vim PE=1 SV=3	VIM	9
ILNTVSLMTVL	ORM1-like protein 3 OS=Mus musculus OX=10090 GN=Ormdl3 PE=2 SV=1	ORMDL3	11			GGGGGGGRYY	Heterogeneous nuclear ribonucleoprotein L OS=Mus musculus OX=10090 GN=Hnrnpl PE=1 SV=2	HNRNPL	10
INMSEIAM	Beta-1,4-galactosyltransferase 5 OS=Mus musculus OX=10090 GN=B4galt5 PE=1 SV=2	B4GALT5	8			GGGGGGRYYG	Heterogeneous nuclear ribonucleoprotein L OS=Mus musculus OX=10090 GN=Hnrnpl PE=1 SV=2	HNRNPL	10
INQGKKTSVVD	Guanylate cyclase D OS=Mus musculus OX=10090 GN=Gucy2d PE=2 SV=1	GUCY2D	11			GGNFGGRSSGP	Heterogeneous nuclear ribonucleoprotein A1 OS=Mus musculus OX=10090 GN=Hnrnpa1 PE=1 SV=2	HNRNPA1	11
IPVTKTPLPQ	Probable cation-transporting ATPase 13A5 OS=Mus musculus OX=10090 GN=Atp13a5 PE=2 SV=2	ATP13A5	10			GGPDFSNLEK	NudC domain-containing protein 2 OS=Mus musculus OX=10090 GN=Nudcd2 PE=1 SV=1	NUDCD2	10
IRGPAEAEATTD	Twinfilin-1 OS=Mus musculus OX=10090 GN=Twf1 PE=1 SV=2	TWF1	12			GGSDGYGSGR	Heterogeneous nuclear ribonucleoproteins A2/B1 OS=Mus musculus OX=10090 GN=Hnrnpa2b1 PE=1 SV=2	HNRNPA2B1	10
IRLKSPVQ	Lysine-specific histone demethylase 1B OS=Mus musculus OX=10090 GN=Kdm1b PE=1 SV=1	KDM1B	8			GGSFGGRSSGSP	Heterogeneous nuclear ribonucleoprotein A3 OS=Mus musculus OX=10090 GN=Hnrnpa3 PE=1 SV=1	HNRNPA3	12
ISGDGLAR	N/A	N/A	8			GGSGGSGGYGGR	Heterogeneous nuclear ribonucleoproteins A2/B1 OS=Mus musculus OX=10090 GN=Hnrnpa2b1 PE=1 SV=2	HNRNPA2B1	12
ITDSQLHTP	Olfactory receptor 1019 OS=Mus musculus OX=10090 GN=Olfr1019 PE=1 SV=1	OLFR1019	9			GGYFLAGRSM	Sodium/glucose cotransporter 2 OS=Mus musculus OX=10090 GN=Slc5a2 PE=1 SV=1	SLC5A2	10
ITEMANKASK	AN1-type zinc finger protein 4 OS=Mus musculus OX=10090 GN=Zfand4 PE=4 SV=2	ZFAND4	10			GIGAILER	Myelin expression factor 2 OS=Mus musculus OX=10090 GN=Myef2 PE=1 SV=1	MYEF2	8
ITERVTTQSG	Thyroid peroxidase OS=Mus musculus OX=10090 GN=Tpo PE=2 SV=1	TPO	10			GIGQDIQPKRDL	60S ribosomal protein L7a OS=Mus musculus OX=10090 GN=Rpl7a PE=1 SV=2	RPL7A	12
ITQTGNPAE	Transmembrane and coiled-coil domain-containing protein 5A OS=Mus musculus OX=10090 GN=Tmco5a PE=1 SV=1	TMCO5A	9			GINKIGGMEGP	Heterogeneous nuclear ribonucleoprotein M OS=Mus musculus OX=10090 GN=Hnrnpm PE=1 SV=3	HNRNPM	11
IVAPPGGR	Dihydropyrimidinase-related protein 2 OS=Mus musculus OX=10090 GN=Dpysl2 PE=1 SV=2;Dihydropyrimidinase-related protein 1 OS=Mus musculus OX=10090 GN=Crmp1 PE=1 SV=1;Dihydropyrimidinase-related protein 3 OS=Mus musculus OX=10090 GN=Dpysl3 PE=1 SV=1	DPYSL2	8			GIQKELQF	L-lactate dehydrogenase A chain OS=Mus musculus OX=10090 GN=Ldha PE=1 SV=3	LDHA	8
IVEFLNLP	N/A	N/A	8			GISGGLSHG	Collagen alpha-1(XVII) chain OS=Mus musculus OX=10090 GN=Col17a1 PE=1 SV=3	COL17A1	9
IVEGLRHN	Protein diaphanous homolog 3 OS=Mus musculus OX=10090 GN=Diaph3 PE=1 SV=1	DIAPH3	8			GKLTGMAF	Glyceraldehyde-3-phosphate dehydrogenase OS=Mus musculus OX=10090 GN=Gapdh PE=1 SV=2	GAPDH	8
IVEIAVGDK	N/A	N/A	9			GKPGLPGP	Collagen alpha-1(X) chain OS=Mus musculus OX=10090 GN=Col10a1 PE=2 SV=1;Collagen alpha-1(XXIII) chain OS=Mus musculus OX=10090 GN=Col23a1 PE=2 SV=2;Collagen alpha-1(XIX) chain OS=Mus musculus OX=10090 GN=Col19a1 PE=2 SV=2	COL10A1	8
IVELLHQS	N/A	N/A	8			GKVPGSFL	Nuclear factor 1 X-type OS=Mus musculus OX=10090 GN=Nfix PE=1 SV=2	NFIX	8
IVPEIQAL	Teneurin-4 OS=Mus musculus OX=10090 GN=Tenm4 PE=1 SV=2	TENM4	8			GLEPEEKLR	IgE-binding protein OS=Mus musculus OX=10090 GN=Iap PE=2 SV=1	IAP	9
KADLEVSNR	Protein fem-1 homolog C OS=Mus musculus OX=10090 GN=Fem1c PE=2 SV=1	FEM1C	9			GLRNVQAEEMVE	ATP synthase subunit alpha, mitochondrial OS=Mus musculus OX=10090 GN=Atp5f1a PE=1 SV=1	ATP5F1A	12
KAIEDKSRSL	Desmoplakin OS=Mus musculus OX=10090 GN=Dsp PE=1 SV=1	DSP	10			GLSVPNVH	Polypyrimidine tract-binding protein 1 OS=Mus musculus OX=10090 GN=Ptbp1 PE=1 SV=2	PTBP1	8
KAISQGVESVK	Mitochondrial import inner membrane translocase subunit TIM44 OS=Mus musculus OX=10090 GN=Timm44 PE=1 SV=2	TIMM44	11			GMGFGLER	Heterogeneous nuclear ribonucleoprotein M OS=Mus musculus OX=10090 GN=Hnrnpm PE=1 SV=3	HNRNPM	8
KAQLGSWGKG	Eukaryotic translation initiation factor 4 gamma 3 OS=Mus musculus OX=10090 GN=Eif4g3 PE=1 SV=2	EIF4G3	10			GNFGFGDSR	Heterogeneous nuclear ribonucleoproteins A2/B1 OS=Mus musculus OX=10090 GN=Hnrnpa2b1 PE=1 SV=2	HNRNPA2B1	9
KAVKSGLPI	Ectopic P granules protein 5 homolog OS=Mus musculus OX=10090 GN=Epg5 PE=1 SV=2	EPG5	9			GNFGGRSSGP	Heterogeneous nuclear ribonucleoprotein A1 OS=Mus musculus OX=10090 GN=Hnrnpa1 PE=1 SV=2	HNRNPA1	10
KAWFPKITE	HIV Tat-specific factor 1 homolog OS=Mus musculus OX=10090 GN=Htatsf1 PE=1 SV=1	HTATSF1	9			GNGLIKVNGRP	40S ribosomal protein S16 OS=Mus musculus OX=10090 GN=Rps16 PE=1 SV=4	RPS16	11
KCIVGVAGG	RUS1 family protein C16orf58 homolog OS=Mus musculus OX=10090 PE=1 SV=1	N/A	9			GNNKLTTF	Nuclear pore complex protein Nup98-Nup96 OS=Mus musculus OX=10090 GN=Nup98 PE=1 SV=2	NUP98	8
KDIAETTP	Cardiac-enriched FHL2-interacting protein OS=Mus musculus OX=10090 GN=CEFIP PE=1 SV=1	CEFIP	8			GPLTTAVTPKG	Seizure 6-like protein 2 OS=Mus musculus OX=10090 GN=Sez6l2 PE=1 SV=1	SEZ6L2	11
KDLAPMKTP	Kelch-like protein 41 OS=Mus musculus OX=10090 GN=Klhl41 PE=1 SV=1	KLHL41	9			GPMKGGNF	Heterogeneous nuclear ribonucleoprotein A1 OS=Mus musculus OX=10090 GN=Hnrnpa1 PE=1 SV=2	HNRNPA1	8
KDVKNNNGQTP	SH3 and multiple ankyrin repeat domains protein 1 OS=Mus musculus OX=10090 GN=Shank1 PE=1 SV=1	SHANK1	11			GPMKGGSF	Heterogeneous nuclear ribonucleoprotein A3 OS=Mus musculus OX=10090 GN=Hnrnpa3 PE=1 SV=1	HNRNPA3	8
KDVKQPEELPA	CCR4-NOT transcription complex subunit 1 OS=Mus musculus OX=10090 GN=Cnot1 PE=1 SV=2	CNOT1	11			GPMKGGSFGG	Heterogeneous nuclear ribonucleoprotein A3 OS=Mus musculus OX=10090 GN=Hnrnpa3 PE=1 SV=1	HNRNPA3	10
KDYAISEAKIKG	IQ domain-containing protein H OS=Mus musculus OX=10090 GN=Iqch PE=2 SV=3	IQCH	12			GPMKGGSFGGR	Heterogeneous nuclear ribonucleoprotein A3 OS=Mus musculus OX=10090 GN=Hnrnpa3 PE=1 SV=1	HNRNPA3	11
KEAAEQDVEKKK	60S ribosomal protein L13 OS=Mus musculus OX=10090 GN=Rpl13 PE=1 SV=3	RPL13	12			GPMKSGNFGGS	Heterogeneous nuclear ribonucleoproteins A2/B1 OS=Mus musculus OX=10090 GN=Hnrnpa2b1 PE=1 SV=2	HNRNPA2B1	11
KEAVLAITTP	Probable helicase with zinc finger domain OS=Mus musculus OX=10090 GN=Helz PE=1 SV=2	HELZ	10			GPMKSGNFGGSR	Heterogeneous nuclear ribonucleoproteins A2/B1 OS=Mus musculus OX=10090 GN=Hnrnpa2b1 PE=1 SV=2	HNRNPA2B1	12
KEDIEYGN	N/A	N/A	8			GPYGGGNYGP	Heterogeneous nuclear ribonucleoproteins A2/B1 OS=Mus musculus OX=10090 GN=Hnrnpa2b1 PE=1 SV=2	HNRNPA2B1	10
KEETIEKMQE	60S ribosomal protein L26 OS=Mus musculus OX=10090 GN=Rpl26 PE=1 SV=1	RPL26	10			GQIFRPDNF	Tubulin beta-5 chain OS=Mus musculus OX=10090 GN=Tubb5 PE=1 SV=1	TUBB5	9
KEITALAPSTM	Actin, cytoplasmic 1 OS=Mus musculus OX=10090 GN=Actb PE=1 SV=1	ACTB	11			GQIIGEGRSGF	28S ribosomal protein S5, mitochondrial OS=Mus musculus OX=10090 GN=Mrps5 PE=1 SV=1	MRPS5	11
KENLKPKTH	Ankyrin-3 OS=Mus musculus OX=10090 GN=Ank3 PE=1 SV=1	ANK3	9			GQVINETSQH	Vimentin OS=Mus musculus OX=10090 GN=Vim PE=1 SV=3	VIM	10
KENTWHPKP	Polycystic kidney disease protein 1-like 2 OS=Mus musculus OX=10090 GN=Pkd1l2 PE=2 SV=1	PKD1L2	9			GRGFGDGYNG	Heterogeneous nuclear ribonucleoproteins A2/B1 OS=Mus musculus OX=10090 GN=Hnrnpa2b1 PE=1 SV=2	HNRNPA2B1	10
KEPIMPAP	Lipoma-preferred partner homolog OS=Mus musculus OX=10090 GN=Lpp PE=1 SV=1	LPP	8			GRGFGDGYNGY	Heterogeneous nuclear ribonucleoproteins A2/B1 OS=Mus musculus OX=10090 GN=Hnrnpa2b1 PE=1 SV=2	HNRNPA2B1	11
KEVGKVGEWAIR	Phospholipid-transporting ATPase ABCA1 OS=Mus musculus OX=10090 GN=Abca1 PE=1 SV=4	ABCA1	12			GSGRGFGDG	Heterogeneous nuclear ribonucleoproteins A2/B1 OS=Mus musculus OX=10090 GN=Hnrnpa2b1 PE=1 SV=2	HNRNPA2B1	9
KFISLLKTA	Multiple PDZ domain protein OS=Mus musculus OX=10090 GN=Mpdz PE=1 SV=2	MPDZ	9			GSGRGFGDGYNG	Heterogeneous nuclear ribonucleoproteins A2/B1 OS=Mus musculus OX=10090 GN=Hnrnpa2b1 PE=1 SV=2	HNRNPA2B1	12
KFSVKEGKP	Structural maintenance of chromosomes flexible hinge domain-containing protein 1 OS=Mus musculus OX=10090 GN=Smchd1 PE=1 SV=2	SMCHD1	9			GSHLQDLF	Protein FAM131A OS=Mus musculus OX=10090 GN=Fam131a PE=2 SV=1	FAM131A	8
KGEGGGATTSAQ	Methyl-CpG-binding protein 2 OS=Mus musculus OX=10090 GN=Mecp2 PE=1 SV=1	MECP2	12			GSSKLVPVGY	Elongation factor 1-beta OS=Mus musculus OX=10090 GN=Eef1b PE=1 SV=5	EEF1B	10
KGGTQLQL	SH3 domain-binding protein 2 OS=Mus musculus OX=10090 GN=Sh3bp2 PE=1 SV=1	SH3BP2	8			GTAGKDHTEEL	Consortin OS=Mus musculus OX=10090 GN=Cnst PE=1 SV=1	CNST	11
KGIQVSITTP	Nephrin OS=Mus musculus OX=10090 GN=Nphs1 PE=1 SV=2	NPHS1	10			GTAPSDNRVTS	NSFL1 cofactor p47 OS=Mus musculus OX=10090 GN=Nsfl1c PE=1 SV=1	NSFL1C	11
KGPEGERPA	40S ribosomal protein S10 OS=Mus musculus OX=10090 GN=Rps10 PE=1 SV=1	RPS10	9			GTMDSVRSGPF	Tubulin beta-5 chain OS=Mus musculus OX=10090 GN=Tubb5 PE=1 SV=1	TUBB5	11
KGSGQTRGMSP	Pleckstrin homology domain-containing family G member 6 OS=Mus musculus OX=10090 GN=Plekhg6 PE=2 SV=2	PLEKHG6	11			GTPFGSSVVNR	Nucleoporin NDC1 OS=Mus musculus OX=10090 GN=Ndc1 PE=1 SV=1	NDC1	11
KGSVIKTQPP	Sprouty-related, EVH1 domain-containing protein 2 OS=Mus musculus OX=10090 GN=Spred2 PE=1 SV=1	SPRED2	10			GVIKVFNDM	Cofilin-1 OS=Mus musculus OX=10090 GN=Cfl1 PE=1 SV=3	CFL1	9
KGTFIPVA	Olfactory receptor 480 OS=Mus musculus OX=10090 GN=Olfr480 PE=3 SV=1	OLFR480	8			GVPLSPSP	Calcium-responsive transcription factor OS=Mus musculus OX=10090 GN=Carf PE=2 SV=1	CARF	8
KGTIEAAV	Laminin subunit alpha-3 OS=Mus musculus OX=10090 GN=Lama3 PE=1 SV=4	LAMA3	8			GVRESVFT	Prohibitin-2 OS=Mus musculus OX=10090 GN=Phb2 PE=1 SV=1	PHB2	8
KGTPWAAAP	StAR-related lipid transfer protein 9 OS=Mus musculus OX=10090 GN=Stard9 PE=1 SV=2	STARD9	9			GVRSKVAPSVDF	Leucine-zipper-like transcriptional regulator 1 OS=Mus musculus OX=10090 GN=Lztr1 PE=1 SV=2	LZTR1	12
KGVLVQTK	Histone H1t OS=Mus musculus OX=10090 GN=Hist1h1t PE=1 SV=4	HIST1H1T	8			GYGMPGKPGP	Collagen alpha-2(VIII) chain OS=Mus musculus OX=10090 GN=Col8a2 PE=2 SV=2	COL8A2	10
KGVLVQTKGT	Histone H1t OS=Mus musculus OX=10090 GN=Hist1h1t PE=1 SV=4	HIST1H1T	10			GYSNRVVDLMAY	Glyceraldehyde-3-phosphate dehydrogenase OS=Mus musculus OX=10090 GN=Gapdh PE=1 SV=2	GAPDH	12
KHGSDRPLG	Partitioning defective 6 homolog alpha OS=Mus musculus OX=10090 GN=Pard6a PE=1 SV=2	PARD6A	9			HGFREGTTP	60S ribosomal protein L37 OS=Mus musculus OX=10090 GN=Rpl37 PE=3 SV=3	RPL37	9
KHQESTTGGK	Transcription factor 7 OS=Mus musculus OX=10090 GN=Tcf7 PE=2 SV=2	TCF7	10			HGIDPTGTY	Tubulin beta-5 chain OS=Mus musculus OX=10090 GN=Tubb5 PE=1 SV=1	TUBB5	9
KHQPSWKPAK	Histidine protein methyltransferase 1 homolog OS=Mus musculus OX=10090 GN=Mettl18 PE=2 SV=2	METTL18	10			HLRNPSAVF	Gamma-glutamylcyclotransferase OS=Mus musculus OX=10090 GN=Ggct PE=1 SV=1	GGCT	9
KIEELLSSL	DNA polymerase iota OS=Mus musculus OX=10090 GN=Poli PE=1 SV=1	POLI	9			HNFGSSTE	G-protein coupled receptor 15 OS=Mus musculus OX=10090 GN=Gpr15 PE=2 SV=2	GPR15	8
KIGFLGLG	Putative oxidoreductase GLYR1 OS=Mus musculus OX=10090 GN=Glyr1 PE=1 SV=1	GLYR1	8			HPEQLITG	Tubulin alpha-8 chain OS=Mus musculus OX=10090 GN=Tuba8 PE=1 SV=1;Tubulin alpha-1A chain OS=Mus musculus OX=10090 GN=Tuba1a PE=1 SV=1	TUBA8	8
KIGGIGTVP	Elongation factor 1-alpha 1 OS=Mus musculus OX=10090 GN=Eef1a1 PE=1 SV=3	EEF1A1	9			HSEAGTAF	Pyruvate kinase PKM OS=Mus musculus OX=10090 GN=Pkm PE=1 SV=4	PKM	8
KIGGIGTVPVGR	Elongation factor 1-alpha 1 OS=Mus musculus OX=10090 GN=Eef1a1 PE=1 SV=3	EEF1A1	12			HSEAGTAFIQTQ	Pyruvate kinase PKM OS=Mus musculus OX=10090 GN=Pkm PE=1 SV=4	PKM	12
KIGRIEDVTP	40S ribosomal protein S14 OS=Mus musculus OX=10090 GN=Rps14 PE=1 SV=3	RPS14	10			HSELCDAA	Zinc finger protein 385C OS=Mus musculus OX=10090 GN=Znf385c PE=2 SV=1	ZNF385C	8
KINSSVKFP	RalBP1-associated Eps domain-containing protein 1 OS=Mus musculus OX=10090 GN=Reps1 PE=1 SV=2	REPS1	9			HTFEEPTYVKVK	Cytochrome c oxidase subunit 1 OS=Mus musculus OX=10090 GN=Mtco1 PE=1 SV=2	MTCO1	12
KIPSPGPAVGP	Zinc finger protein 541 OS=Mus musculus OX=10090 GN=Znf541 PE=1 SV=1	ZNF541	11			HVGQAGVQIGN	Tubulin alpha-8 chain OS=Mus musculus OX=10090 GN=Tuba8 PE=1 SV=1;Tubulin alpha-1A chain OS=Mus musculus OX=10090 GN=Tuba1a PE=1 SV=1	TUBA8	11
KITSYRRP	Protein FAM228A OS=Mus musculus OX=10090 GN=Fam228a PE=2 SV=1	FAM228A	8			IAHAALDLVDEN	Trafficking protein particle complex subunit 2 OS=Mus musculus OX=10090 GN=Trappc2 PE=1 SV=1	TRAPPC2	12
KKAGIEVP	Peptidyl-glycine alpha-amidating monooxygenase OS=Mus musculus OX=10090 GN=Pam PE=1 SV=2	PAM	8			IAITGYDG	Guanine nucleotide exchange factor DBS OS=Mus musculus OX=10090 GN=Mcf2l PE=1 SV=2	MCF2L	8
KKGQSEEIQKK	60S ribosomal protein L24 OS=Mus musculus OX=10090 GN=Rpl24 PE=1 SV=2	RPL24	11			IEVSPINF	Solute carrier family 52, riboflavin transporter, member 2 OS=Mus musculus OX=10090 GN=Slc52a2 PE=2 SV=1	SLC52A2	8
KKNSEGLLK	Beclin 1-associated autophagy-related key regulator OS=Mus musculus OX=10090 GN=Atg14 PE=1 SV=1	ATG14	9			IEYSKTFK	Golgi pH regulator OS=Mus musculus OX=10090 GN=Gpr89a PE=1 SV=2	GPR89A	8
KKQTLLHS	Protein phosphatase 1 regulatory subunit 12A OS=Mus musculus OX=10090 GN=Ppp1r12a PE=1 SV=2	PPP1R12A	8			IGIVKQAGLDR	Heterogeneous nuclear ribonucleoprotein F OS=Mus musculus OX=10090 GN=Hnrnpf PE=1 SV=3	HNRNPF	11
KKSQQKKK	Cytoplasmic tyrosine-protein kinase BMX OS=Mus musculus OX=10090 GN=Bmx PE=2 SV=1	BMX	8			IHVGQAGVQIGN	Tubulin alpha-1A chain OS=Mus musculus OX=10090 GN=Tuba1a PE=1 SV=1	TUBA1A	12
KKSSGGLLG	Pleckstrin homology domain-containing family O member 2 OS=Mus musculus OX=10090 GN=Plekho2 PE=1 SV=1	PLEKHO2	9			IIDVVRSGYY	60S ribosomal protein L27a OS=Mus musculus OX=10090 GN=Rpl27a PE=1 SV=5	RPL27A	10
KLDRAQPVVP	Protein adenylyltransferase FICD OS=Mus musculus OX=10090 GN=Ficd PE=2 SV=1	FICD	10			ILDQTNVSA	Heterogeneous nuclear ribonucleoprotein U OS=Mus musculus OX=10090 GN=Hnrnpu PE=1 SV=1	HNRNPU	9
KLEGLATAVTP	Oxysterol-binding protein-related protein 11 OS=Mus musculus OX=10090 GN=Osbpl11 PE=1 SV=2	OSBPL11	11			ILMNRPNAR	Enoyl-CoA hydratase domain-containing protein 2, mitochondrial OS=Mus musculus OX=10090 GN=Echdc2 PE=1 SV=2	ECHDC2	9
KLSDVMIL	Sodium channel protein type 8 subunit alpha OS=Mus musculus OX=10090 GN=Scn8a PE=1 SV=1;Sodium channel protein type 9 subunit alpha OS=Mus musculus OX=10090 GN=Scn9a PE=1 SV=2;Sodium channel protein type 3 subunit alpha OS=Mus musculus OX=10090 GN=Scn3a PE=1 SV=1;Sodium channel protein type 2 subunit alpha OS=Mus musculus OX=10090 GN=Scn2a PE=1 SV=1;Sodium channel protein type 1 subunit alpha OS=…	SCN8A	8			ILTKSSPE	Retinoid-inducible serine carboxypeptidase OS=Mus musculus OX=10090 GN=Scpep1 PE=1 SV=2	SCPEP1	8
KLSVIDML	Transmembrane channel-like protein 3 OS=Mus musculus OX=10090 GN=Tmc3 PE=2 SV=1	TMC3	8			INTYNKTDVAAP	Mitochondrial 10-formyltetrahydrofolate dehydrogenase OS=Mus musculus OX=10090 GN=Aldh1l2 PE=1 SV=2	ALDH1L2	12
KLVENHLDS	Thioredoxin domain-containing protein 9 OS=Mus musculus OX=10090 GN=Txndc9 PE=1 SV=1	TXNDC9	9			IREEYPDR	Tubulin beta-1 chain OS=Mus musculus OX=10090 GN=Tubb1 PE=1 SV=1;Tubulin beta-5 chain OS=Mus musculus OX=10090 GN=Tubb5 PE=1 SV=1	TUBB1	8
KMAILGLG	Carboxypeptidase Q OS=Mus musculus OX=10090 GN=Cpq PE=1 SV=1	CPQ	8			IREEYPDRIM	Tubulin beta-5 chain OS=Mus musculus OX=10090 GN=Tubb5 PE=1 SV=1	TUBB5	10
KMEISQLT	Centrosomal protein of 63 kDa OS=Mus musculus OX=10090 GN=Cep63 PE=1 SV=2	CEP63	8			IRGNVGFVF	60S acidic ribosomal protein P0 OS=Mus musculus OX=10090 GN=Rplp0 PE=1 SV=3	RPLP0	9
KMKLAKGP	Adhesion G protein-coupled receptor B1 OS=Mus musculus OX=10090 GN=Adgrb1 PE=1 SV=1	ADGRB1	8			IRVTNPNAR	60S ribosomal protein L32 OS=Mus musculus OX=10090 GN=Rpl32 PE=1 SV=2	RPL32	9
KNANKSEI	Sorting nexin-25 OS=Mus musculus OX=10090 GN=Snx25 PE=1 SV=3	SNX25	8			IRVVGSEFVQK	26S proteasome regulatory subunit 6B OS=Mus musculus OX=10090 GN=Psmc4 PE=1 SV=2	PSMC4	11
KNNLPFGYIPD	Leukocyte elastase inhibitor C OS=Mus musculus OX=10090 GN=Serpinb1c PE=1 SV=1	SERPINB1C	11			ISTRLGTEEISP	Unconventional myosin-Ic OS=Mus musculus OX=10090 GN=Myo1c PE=1 SV=2	MYO1C	12
KNSNTDSVKTP	Neurite extension and migration factor OS=Mus musculus OX=10090 GN=Nexmif PE=2 SV=3	NEXMIF	11			ITEFSDITR	Lamina-associated polypeptide 2, isoforms beta/delta/epsilon/gamma OS=Mus musculus OX=10090 GN=Tmpo PE=1 SV=4	TMPO	9
KPDFAVTL	Protein FAM13A OS=Mus musculus OX=10090 GN=Fam13a PE=1 SV=1	FAM13A	8			ITSKPIVF	Signal recognition particle receptor subunit alpha OS=Mus musculus OX=10090 GN=Srpra PE=1 SV=1	SRPRA	8
KPGDLIEIFRP	Phospholipase A and acyltransferase 3 OS=Mus musculus OX=10090 GN=Plaat3 PE=1 SV=2	PLAAT3	11			IVERLTNS	40S ribosomal protein S5 OS=Mus musculus OX=10090 GN=Rps5 PE=1 SV=3	RPS5	8
KPQNADELML	Ubiquitin-associated and SH3 domain-containing protein A OS=Mus musculus OX=10090 GN=Ubash3a PE=1 SV=1	UBASH3A	10			IVSTPPGGFPPP	DAZ-associated protein 1 OS=Mus musculus OX=10090 GN=Dazap1 PE=1 SV=2	DAZAP1	12
KPSSNVTP	Tudor domain-containing protein 1 OS=Mus musculus OX=10090 GN=Tdrd1 PE=1 SV=2	TDRD1	8			IVTSLSLPVQ	0	?	10
KPTEEEAEQL	Integrator complex subunit 2 OS=Mus musculus OX=10090 GN=Ints2 PE=1 SV=2	INTS2	10			IYDKDPEGTVQP	Cysteine-rich protein 2 OS=Mus musculus OX=10090 GN=Crip2 PE=1 SV=1	CRIP2	12
KPTTLSLPL	Peroxisome proliferator-activated receptor gamma coactivator 1-alpha OS=Mus musculus OX=10090 GN=Ppargc1a PE=1 SV=1	PPARGC1A	9			KAAKAGYP	0	?	8
KPVPVPRQ	Rhotekin-2 OS=Mus musculus OX=10090 GN=Rtkn2 PE=1 SV=2	RTKN2	8			KADFRGQWV	Protein SCO2 homolog, mitochondrial OS=Mus musculus OX=10090 GN=Sco2 PE=1 SV=1	SCO2	9
KPYAMTLNYG	Contactin-associated protein like 5-3 OS=Mus musculus OX=10090 GN=Cntnap5c PE=2 SV=1	CNTNAP5C	10			KADGIVSKNF	40S ribosomal protein S21 OS=Mus musculus OX=10090 GN=Rps21 PE=1 SV=1	RPS21	10
KQGKINQMATA	Structural maintenance of chromosomes protein 3 OS=Mus musculus OX=10090 GN=Smc3 PE=1 SV=2	SMC3	11			KADQLYKQK	Pyruvate dehydrogenase E1 component subunit alpha, somatic form, mitochondrial OS=Mus musculus OX=10090 GN=Pdha1 PE=1 SV=1	PDHA1	9
KQSSLQLAPAQ	POM121-like protein 2 OS=Mus musculus OX=10090 GN=Pom121l2 PE=3 SV=1	POM121L2	11			KAEAGAGSATEF	40S ribosomal protein S10 OS=Mus musculus OX=10090 GN=Rps10 PE=1 SV=1	RPS10	12
KRAEVLEHL	Structural maintenance of chromosomes protein 1B OS=Mus musculus OX=10090 GN=Smc1b PE=1 SV=1	SMC1B	9			KANHLNKLAE	Protein-glutamine gamma-glutamyltransferase 2 OS=Mus musculus OX=10090 GN=Tgm2 PE=1 SV=4	TGM2	10
KRKAGGHEESIP	Ribosomal RNA-processing protein 7 homolog A OS=Mus musculus OX=10090 GN=Rrp7a PE=2 SV=1	RRP7A	12			KAPGTDEKVIVN	Zinc transporter ZIP14 OS=Mus musculus OX=10090 GN=Slc39a14 PE=1 SV=1	SLC39A14	12
KSAPAPKKGSK	Histone H2B type 1-B OS=Mus musculus OX=10090 GN=Hist1h2bb PE=1 SV=3;Histone H2B type 2-B OS=Mus musculus OX=10090 GN=Hist2h2bb PE=1 SV=3;Histone H2B type 3-B OS=Mus musculus OX=10090 GN=Hist3h2bb PE=1 SV=3;Histone H2B type 1-F/J/L OS=Mus musculus OX=10090 GN=H2bc7 PE=1 SV=2	HIST1H2BB	11			KCKPNQTR	Diphosphoinositol polyphosphate phosphohydrolase 3-alpha OS=Mus musculus OX=10090 GN=Nudt10 PE=1 SV=1	NUDT10	8
KSAVKNVP	Dynein heavy chain 17, axonemal OS=Mus musculus OX=10090 GN=Dnah17 PE=1 SV=2	DNAH17	8			KDFKGKAP	FRAS1-related extracellular matrix protein 3 OS=Mus musculus OX=10090 GN=Frem3 PE=2 SV=2	FREM3	8
KSDPMVQCII	Elongation factor 2 OS=Mus musculus OX=10090 GN=Eef2 PE=1 SV=2	EEF2	10			KDSGVDIAAGNM	Trifunctional purine biosynthetic protein adenosine-3 OS=Mus musculus OX=10090 GN=Gart PE=1 SV=3	GART	12
KSEESRQER	Zinc finger-containing ubiquitin peptidase 1 OS=Mus musculus OX=10090 GN=Zup1 PE=2 SV=2	ZUP1	9			KDSPYYQGFESY	Zinc finger protein 609 OS=Mus musculus OX=10090 GN=Znf609 PE=1 SV=2	ZNF609	12
KSEFLGFTGY	Protein DBF4 homolog A OS=Mus musculus OX=10090 GN=Dbf4 PE=1 SV=1	DBF4	10			KEAIEGTY	40S ribosomal protein S11 OS=Mus musculus OX=10090 GN=Rps11 PE=1 SV=3	RPS11	8
KSEKSEMPVN	Adhesion G-protein coupled receptor G4 OS=Mus musculus OX=10090 GN=Adgrg4 PE=3 SV=1	ADGRG4	10			KEDAANNY	Tubulin alpha-8 chain OS=Mus musculus OX=10090 GN=Tuba8 PE=1 SV=1;Tubulin alpha-1A chain OS=Mus musculus OX=10090 GN=Tuba1a PE=1 SV=1	TUBA8	8
KSEKTLEQNVS	DNA excision repair protein ERCC-6-like 2 OS=Mus musculus OX=10090 GN=Ercc6l2 PE=1 SV=3	ERCC6L2	11			KEEGLNAFY	Phosphate carrier protein, mitochondrial OS=Mus musculus OX=10090 GN=Slc25a3 PE=1 SV=1	SLC25A3	9
KSGDAAIVDMVP	Elongation factor 1-alpha 1 OS=Mus musculus OX=10090 GN=Eef1a1 PE=1 SV=3	EEF1A1	12			KEITALAPSTM	Actin, gamma-enteric smooth muscle OS=Mus musculus OX=10090 GN=Actg2 PE=1 SV=1;Actin, cytoplasmic 1 OS=Mus musculus OX=10090 GN=Actb PE=1 SV=1	ACTG2	11
KSGKINVRP	Aryl hydrocarbon receptor nuclear translocator-like protein 2 OS=Mus musculus OX=10090 GN=Arntl2 PE=1 SV=2	ARNTL2	9			KESEDFIVEQY	DNA replication licensing factor MCM6 OS=Mus musculus OX=10090 GN=Mcm6 PE=1 SV=1	MCM6	11
KSTESRGQGAGA	Metabotropic glutamate receptor 5 OS=Mus musculus OX=10090 GN=Grm5 PE=1 SV=2	GRM5	12			KFAAATGATP	40S ribosomal protein SA OS=Mus musculus OX=10090 GN=Rpsa PE=1 SV=4	RPSA	10
KSTRKQKK	NACHT, LRR and PYD domains-containing protein 10 OS=Mus musculus OX=10090 GN=Nlrp10 PE=1 SV=1	NLRP10	8			KFAAATGATPIA	40S ribosomal protein SA OS=Mus musculus OX=10090 GN=Rpsa PE=1 SV=4	RPSA	12
KSTVYVSNLP	Zinc finger CCHC-type and RNA-binding motif-containing protein 1 OS=Mus musculus OX=10090 GN=Zcrb1 PE=1 SV=1	ZCRB1	10			KFIDTTSKF	60S ribosomal protein L3 OS=Mus musculus OX=10090 GN=Rpl3 PE=1 SV=3	RPL3	9
KTAGQTVVA	E1A-binding protein p400 OS=Mus musculus OX=10090 GN=Ep400 PE=1 SV=3	EP400	9			KGGKGLGKGGAK	Histone H4 OS=Mus musculus OX=10090 GN=H4c1 PE=1 SV=2	H4C1	12
KTETTSKNAS	DNA repair-scaffolding protein OS=Mus musculus OX=10090 GN=Spidr PE=2 SV=1	SPIDR	10			KGGLDPMF	CMRF35-like molecule 1 OS=Mus musculus OX=10090 GN=Cd300lf PE=1 SV=1	CD300LF	8
KTSSKKGT	Synaptotagmin-8 OS=Mus musculus OX=10090 GN=Syt8 PE=1 SV=1	SYT8	8			KGGNFGGRSSGP	Heterogeneous nuclear ribonucleoprotein A1 OS=Mus musculus OX=10090 GN=Hnrnpa1 PE=1 SV=2	HNRNPA1	12
KVASQRISSVDL	PH domain leucine-rich repeat-containing protein phosphatase 1 OS=Mus musculus OX=10090 GN=Phlpp1 PE=1 SV=2	PHLPP1	12			KGKEKGGKNA	Synaptotagmin-1 OS=Mus musculus OX=10090 GN=Syt1 PE=1 SV=1	SYT1	10
KVDLQSLP	Protein dpy-30 homolog OS=Mus musculus OX=10090 GN=Dpy30 PE=1 SV=1	DPY30	8			KGPEGERPARF	40S ribosomal protein S10 OS=Mus musculus OX=10090 GN=Rps10 PE=1 SV=1	RPS10	11
KVGILPFV	Exocyst complex component 1 OS=Mus musculus OX=10090 GN=Exoc1 PE=1 SV=4	EXOC1	8			KHFELGGDKK	60S ribosomal protein L36a OS=Mus musculus OX=10090 GN=Rpl36a PE=3 SV=2	RPL36A	10
KVVTPLHI	Disks large homolog 5 OS=Mus musculus OX=10090 GN=Dlg5 PE=1 SV=1	DLG5	8			KHLTMMNKAP	Microtubule-associated tumor suppressor 1 homolog OS=Mus musculus OX=10090 GN=Mtus1 PE=1 SV=2	MTUS1	10
KYSDPGPV	Tripeptidyl-peptidase 2 OS=Mus musculus OX=10090 GN=Tpp2 PE=1 SV=3	TPP2	8			KIEDNNTLVF	60S ribosomal protein L23a OS=Mus musculus OX=10090 GN=Rpl23a PE=1 SV=1	RPL23A	10
LAQDRTPIG	Transcription factor AP-2-beta OS=Mus musculus OX=10090 GN=Tfap2b PE=1 SV=2	TFAP2B	9			KIEEIKDF	60S ribosomal protein L38 OS=Mus musculus OX=10090 GN=Rpl38 PE=1 SV=3	RPL38	8
LAQIIRQVQ	Forkhead box protein H1 OS=Mus musculus OX=10090 GN=Foxh1 PE=1 SV=1	FOXH1	9			KITEGVNVT	Neural cell adhesion molecule L1-like protein OS=Mus musculus OX=10090 GN=Chl1 PE=1 SV=2	CHL1	9
LAVKENKQH	Ankyrin repeat domain-containing protein 26 OS=Mus musculus OX=10090 GN=Ankrd26 PE=1 SV=2	ANKRD26	9			KKCSQIAACLP	GC-rich sequence DNA-binding factor 2 OS=Mus musculus OX=10090 GN=Gcfc2 PE=1 SV=2	GCFC2	11
LDKWEQIVGQ	Cytochrome P450 4A12A OS=Mus musculus OX=10090 GN=Cyp4a12a PE=1 SV=2	CYP4A12A	10			KKNPATTF	Extended synaptotagmin-3 OS=Mus musculus OX=10090 GN=Esyt3 PE=2 SV=2	ESYT3	8
LDLPEELPG	Methylmalonyl-CoA mutase, mitochondrial OS=Mus musculus OX=10090 GN=Mmut PE=1 SV=2	MMUT	9			KKPGQEVF	EF-hand domain-containing family member C2 OS=Mus musculus OX=10090 GN=Efhc2 PE=2 SV=2	EFHC2	8
LEEISGDG	Collagen alpha-5(VI) chain OS=Mus musculus OX=10090 GN=Col6a5 PE=1 SV=4	COL6A5	8			KKSQAHKTL	Methylmalonic aciduria and homocystinuria type D homolog, mitochondrial OS=Mus musculus OX=10090 GN=Mmadhc PE=1 SV=1	MMADHC	9
LEGLEGSSAAEI	Pleckstrin homology domain-containing family G member 2 OS=Mus musculus OX=10090 GN=Plekhg2 PE=2 SV=2	PLEKHG2	12			KKVGIVGKY	60S ribosomal protein L37a OS=Mus musculus OX=10090 GN=Rpl37a PE=1 SV=2	RPL37A	9
LGGLPIMVNI	Armadillo repeat-containing protein 4 OS=Mus musculus OX=10090 GN=Armc4 PE=1 SV=1	ARMC4	10			KKVGIVGKYGT	60S ribosomal protein L37a OS=Mus musculus OX=10090 GN=Rpl37a PE=1 SV=2	RPL37A	11
LGLGLGLG	RNA-binding protein 42 OS=Mus musculus OX=10090 GN=Rbm42 PE=1 SV=2;Ectonucleotide pyrophosphatase/phosphodiesterase family member 3 OS=Mus musculus OX=10090 GN=Enpp3 PE=1 SV=2;Nitric oxide synthase, endothelial OS=Mus musculus OX=10090 GN=Nos3 PE=1 SV=4;Polycystic kidney disease and receptor for egg jelly-related protein OS=Mus musculus OX=10090 GN=Pkdrej PE=2 SV=1	RBM42	8			KLAVNMVP	Tubulin beta-1 chain OS=Mus musculus OX=10090 GN=Tubb1 PE=1 SV=1;Tubulin beta-5 chain OS=Mus musculus OX=10090 GN=Tubb5 PE=1 SV=1	TUBB1	8
LGLVCVLLPLH	ER degradation-enhancing alpha-mannosidase-like protein 2 OS=Mus musculus OX=10090 GN=Edem2 PE=1 SV=1	EDEM2	11			KLCVFMGKTDP	Acyl-CoA dehydrogenase family member 10 OS=Mus musculus OX=10090 GN=Acad10 PE=1 SV=1	ACAD10	11
LGQKCPNLK	F-box/LRR-repeat protein 12 OS=Mus musculus OX=10090 GN=Fbxl12 PE=2 SV=1	FBXL12	9			KLIEVDDERKLR	40S ribosomal protein S6 OS=Mus musculus OX=10090 GN=Rps6 PE=1 SV=1	RPS6	12
LGSILLLGL	Cadherin-related family member 3 OS=Mus musculus OX=10090 GN=Cdhr3 PE=2 SV=2	CDHR3	9			KLSAGTLK	Mitochondrial RNA pseudouridine synthase Rpusd4 OS=Mus musculus OX=10090 GN=Rpusd4 PE=2 SV=1	RPUSD4	8
LGTVHSLGR	Basal cell adhesion molecule OS=Mus musculus OX=10090 GN=Bcam PE=1 SV=1	BCAM	9			KLTRDETNY	Receptor of activated protein C kinase 1 OS=Mus musculus OX=10090 GN=Rack1 PE=1 SV=3	RACK1	9
LLDVHIHKPM	ER degradation-enhancing alpha-mannosidase-like protein 3 OS=Mus musculus OX=10090 GN=Edem3 PE=1 SV=2	EDEM3	10			KLTSDDVKEQIY	40S ribosomal protein S13 OS=Mus musculus OX=10090 GN=Rps13 PE=1 SV=2	RPS13	12
LLDVTKTNLSV	Kinesin heavy chain isoform 5A OS=Mus musculus OX=10090 GN=Kif5a PE=1 SV=3	KIF5A	11			KMDPSCTVGF	Cysteine protease ATG4D OS=Mus musculus OX=10090 GN=Atg4d PE=1 SV=1	ATG4D	10
LLEPLGRRK	Spectrin beta chain, erythrocytic OS=Mus musculus OX=10090 GN=Sptb PE=1 SV=4	SPTB	9			KNIQPTMKMMA	Fer-1-like protein 5 OS=Mus musculus OX=10090 GN=Fer1l5 PE=1 SV=1	FER1L5	11
LLERYGVI	Pre-mRNA-splicing factor ATP-dependent RNA helicase DHX15 OS=Mus musculus OX=10090 GN=Dhx15 PE=1 SV=2	DHX15	8			KNLQTVNVDEN	60S ribosomal protein L31 OS=Mus musculus OX=10090 GN=Rpl31 PE=1 SV=1	RPL31	11
LMTCRVVGAT	Neurensin-2 OS=Mus musculus OX=10090 GN=Nrsn2 PE=1 SV=1	NRSN2	10			KNNFSDTGNF	60S ribosomal protein L11 OS=Mus musculus OX=10090 GN=Rpl11 PE=1 SV=4	RPL11	10
LNTKEFWSF	ATP-binding cassette sub-family A member 5 OS=Mus musculus OX=10090 GN=Abca5 PE=1 SV=2	ABCA5	9			KNVIGARRA	14-3-3 protein epsilon OS=Mus musculus OX=10090 GN=Ywhae PE=1 SV=1	YWHAE	9
LPKIATAP	NACHT, LRR and PYD domains-containing protein 1a OS=Mus musculus OX=10090 GN=Nlrp1a PE=1 SV=1	NLRP1A	8			KPQKPGKY	Transcription factor HIVEP3 OS=Mus musculus OX=10090 GN=Hivep3 PE=1 SV=1	HIVEP3	8
LQAVLPPAV	SH3-containing GRB2-like protein 3-interacting protein 1 OS=Mus musculus OX=10090 GN=Sgip1 PE=1 SV=1	SGIP1	9			KPSLPPRKE	SH3 and PX domain-containing protein 2B OS=Mus musculus OX=10090 GN=Sh3pxd2b PE=1 SV=1	SH3PXD2B	9
LQCRGIAQDGGP	Ephrin type-A receptor 1 OS=Mus musculus OX=10090 GN=Epha1 PE=1 SV=2	EPHA1	12			KQISPEARY	ADP/ATP translocase 4 OS=Mus musculus OX=10090 GN=Slc25a31 PE=1 SV=1	SLC25A31	9
LQEKFRPS	Isochorismatase domain-containing protein 2A OS=Mus musculus OX=10090 GN=Isoc2a PE=1 SV=1	ISOC2A	8			KQSGGAGQFGKV	Elongation factor G, mitochondrial OS=Mus musculus OX=10090 GN=Gfm1 PE=1 SV=1	GFM1	12
LQIDNARLA	Keratin, type I cytoskeletal 16 OS=Mus musculus OX=10090 GN=Krt16 PE=1 SV=3;Keratin, type I cytoskeletal 24 OS=Mus musculus OX=10090 GN=Krt24 PE=2 SV=2;Keratin, type I cytoskeletal 10 OS=Mus musculus OX=10090 GN=Krt10 PE=1 SV=3	KRT16	9			KQTKGVGASGSF	Histone H1.0 OS=Mus musculus OX=10090 GN=H1-0 PE=2 SV=4	H1-0	12
LSDPEVLAAMQD	Hsc70-interacting protein OS=Mus musculus OX=10090 GN=St13 PE=1 SV=1	ST13	12			KRKLAAAA	Protein piccolo OS=Mus musculus OX=10090 GN=Pclo PE=1 SV=4	PCLO	8
LTDGSASKSP	Little elongation complex subunit 1 OS=Mus musculus OX=10090 GN=Ice1 PE=1 SV=1	ICE1	10			KSTQFNVE	Solute carrier family 35 member C2 OS=Mus musculus OX=10090 GN=Slc35c2 PE=1 SV=1	SLC35C2	8
LTETTKVYH	Thrombospondin type-1 domain-containing protein 1 OS=Mus musculus OX=10090 GN=Thsd1 PE=1 SV=2	THSD1	9			KTGNKIRY	60S ribosomal protein L39 OS=Mus musculus OX=10090 GN=Rpl39 PE=1 SV=2	RPL39	8
LTLSDPGVTP	Integrin alpha-3 OS=Mus musculus OX=10090 GN=Itga3 PE=1 SV=1	ITGA3	10			KTGNKVGFK	Deoxyribose-phosphate aldolase OS=Mus musculus OX=10090 GN=Dera PE=1 SV=1	DERA	9
LVETLNAAI	Very-long-chain (3R)-3-hydroxyacyl-CoA dehydratase 3 OS=Mus musculus OX=10090 GN=Hacd3 PE=1 SV=2	HACD3	9			KTHAEIKTL	Titin OS=Mus musculus OX=10090 GN=Ttn PE=1 SV=1	TTN	9
LVGCKSDLRT	Rho-related GTP-binding protein RhoE OS=Mus musculus OX=10090 GN=Rnd3 PE=1 SV=1	RND3	10			KTIGTGLVTD	Elongation factor Tu, mitochondrial OS=Mus musculus OX=10090 GN=Tufm PE=1 SV=1	TUFM	10
LVREAGSVL	Fanconi-associated nuclease 1 OS=Mus musculus OX=10090 GN=Fan1 PE=2 SV=2	FAN1	9			KTPKEAIEGTY	40S ribosomal protein S11 OS=Mus musculus OX=10090 GN=Rps11 PE=1 SV=3	RPS11	11
MDLAGGPGP	T-cell leukemia homeobox protein 1 OS=Mus musculus OX=10090 GN=Tlx1 PE=1 SV=1	TLX1	9			KVASQRISSVDL	PH domain leucine-rich repeat-containing protein phosphatase 1 OS=Mus musculus OX=10090 GN=Phlpp1 PE=1 SV=2	PHLPP1	12
MIPKPEEIN	Cleft lip and palate transmembrane protein 1-like protein OS=Mus musculus OX=10090 GN=Clptm1l PE=1 SV=1	CLPTM1L	9			KVDENGKISR	Ubiquitin-40S ribosomal protein S27a OS=Mus musculus OX=10090 GN=Rps27a PE=1 SV=2	RPS27A	10
MIPVFPPDQ	Transcription factor SOX-5 OS=Mus musculus OX=10090 GN=Sox5 PE=1 SV=2	SOX5	9			KVDENGKISRL	Ubiquitin-40S ribosomal protein S27a OS=Mus musculus OX=10090 GN=Rps27a PE=1 SV=2	RPS27A	11
MRLRNGTVATA	Alpha-1,3-mannosyl-glycoprotein 4-beta-N-acetylglucosaminyltransferase A OS=Mus musculus OX=10090 GN=Mgat4a PE=2 SV=1	MGAT4A	11			KVDENGKISRLR	Ubiquitin-40S ribosomal protein S27a OS=Mus musculus OX=10090 GN=Rps27a PE=1 SV=2	RPS27A	12
MVSLGVSERAE	Netrin receptor UNC5D OS=Mus musculus OX=10090 GN=Unc5d PE=1 SV=1	UNC5D	11			KVERILSVKGL	Complement C5 OS=Mus musculus OX=10090 GN=C5 PE=1 SV=2	C5	11
NAVQLVKTTP	E3 ubiquitin-protein ligase HUWE1 OS=Mus musculus OX=10090 GN=Huwe1 PE=1 SV=5	HUWE1	10			KVGENADSQIKL	Histone H1.0 OS=Mus musculus OX=10090 GN=H1-0 PE=2 SV=4	H1-0	12
NDLDESQPP	Microtubule-associated serine/threonine-protein kinase 3 OS=Mus musculus OX=10090 GN=Mast3 PE=1 SV=3	MAST3	9			KVGIVGKY	60S ribosomal protein L37a OS=Mus musculus OX=10090 GN=Rpl37a PE=1 SV=2	RPL37A	8
NFSLLTNVPIP	cAMP-specific 3',5'-cyclic phosphodiesterase 4A OS=Mus musculus OX=10090 GN=Pde4a PE=1 SV=2	PDE4A	11			KVNRQQLVK	E3 ubiquitin-protein ligase UBR4 OS=Mus musculus OX=10090 GN=Ubr4 PE=1 SV=1	UBR4	9
NGSGSLGSTTP	E3 ubiquitin-protein ligase TRIP12 OS=Mus musculus OX=10090 GN=Trip12 PE=1 SV=1	TRIP12	11			KVSDTVVEPY	Tubulin beta-1 chain OS=Mus musculus OX=10090 GN=Tubb1 PE=1 SV=1;Tubulin beta-5 chain OS=Mus musculus OX=10090 GN=Tubb5 PE=1 SV=1	TUBB1	10
NGSNDRGMK	TBC1 domain family member 23 OS=Mus musculus OX=10090 GN=Tbc1d23 PE=1 SV=1	TBC1D23	9			KVTKAAGTKKQF	40S ribosomal protein S11 OS=Mus musculus OX=10090 GN=Rps11 PE=1 SV=3	RPS11	12
NICSLALSADLP	Vitamin D 25-hydroxylase OS=Mus musculus OX=10090 GN=Cyp2r1 PE=1 SV=1	CYP2R1	12			KVVKVANVS	40S ribosomal protein S23 OS=Mus musculus OX=10090 GN=Rps23 PE=1 SV=3	RPS23	9
NLVDSYMSIIN	Dynamin-3 OS=Mus musculus OX=10090 GN=Dnm3 PE=1 SV=1	DNM3	11			KVVKVANVSLL	40S ribosomal protein S23 OS=Mus musculus OX=10090 GN=Rps23 PE=1 SV=3	RPS23	11
NNVSTRVSSLP	Cyclin-dependent kinase-like 5 OS=Mus musculus OX=10090 GN=Cdkl5 PE=1 SV=1	CDKL5	11			KVVKVANVSLLA	40S ribosomal protein S23 OS=Mus musculus OX=10090 GN=Rps23 PE=1 SV=3	RPS23	12
NPGIKFTTV	WD repeat-containing protein 78 OS=Mus musculus OX=10090 GN=Wdr78 PE=1 SV=1	WDR78	9			KWSAELAF	Cell division cycle protein 23 homolog OS=Mus musculus OX=10090 GN=Cdc23 PE=1 SV=2	CDC23	8
NRKAIMDK	Smoothelin-like protein 1 OS=Mus musculus OX=10090 GN=Smtnl1 PE=1 SV=1	SMTNL1	8			KYNLFMVP	Type 2 DNA topoisomerase 6 subunit B-like OS=Mus musculus OX=10090 GN=Top6bl PE=1 SV=2	TOP6BL	8
NSNSQVSEL	EF-hand calcium-binding domain-containing protein 14 OS=Mus musculus OX=10090 GN=Efcab14 PE=2 SV=1	EFCAB14	9			LAKSDPMVQ	Elongation factor 2 OS=Mus musculus OX=10090 GN=Eef2 PE=1 SV=2	EEF2	9
NTPQAANSPPN	Lysine-specific demethylase 3A OS=Mus musculus OX=10090 GN=Kdm3a PE=1 SV=1	KDM3A	11			LAMHSLPHVINP	GPI transamidase component PIG-S OS=Mus musculus OX=10090 GN=Pigs PE=1 SV=3	PIGS	12
NVEIDPEIQ	Keratin, type II cytoskeletal 79 OS=Mus musculus OX=10090 GN=Krt79 PE=1 SV=2	KRT79	9			LDIEFDVHL	Glutamine--fructose-6-phosphate aminotransferase [isomerizing] 1 OS=Mus musculus OX=10090 GN=Gfpt1 PE=1 SV=3	GFPT1	9
PAFDVKILDE	N/A	N/A	10			LDIERPTY	Tubulin alpha-8 chain OS=Mus musculus OX=10090 GN=Tuba8 PE=1 SV=1;Tubulin alpha-1A chain OS=Mus musculus OX=10090 GN=Tuba1a PE=1 SV=1	TUBA8	8
PASLVRYPR	E3 ubiquitin-protein ligase HECTD3 OS=Mus musculus OX=10090 GN=Hectd3 PE=1 SV=2	HECTD3	9			LEDIVEGGGY	CD99 antigen-like protein 2 OS=Mus musculus OX=10090 GN=Cd99l2 PE=1 SV=1	CD99L2	10
PASTGAAKAVGK	Glyceraldehyde-3-phosphate dehydrogenase OS=Mus musculus OX=10090 GN=Gapdh PE=1 SV=2	GAPDH	12			LEDPQTHSNRIY	Heat shock protein HSP 90-beta OS=Mus musculus OX=10090 GN=Hsp90ab1 PE=1 SV=3	HSP90AB1	12
PDPAKSAP	Histone H2B type 2-B OS=Mus musculus OX=10090 GN=Hist2h2bb PE=1 SV=3	HIST2H2BB	8			LEEKTAGMMT	Syntaxin-binding protein 5-like OS=Mus musculus OX=10090 GN=Stxbp5l PE=1 SV=1	STXBP5L	10
PDPAKSAPAPK	Histone H2B type 2-B OS=Mus musculus OX=10090 GN=Hist2h2bb PE=1 SV=3	HIST2H2BB	11			LFRNITVDD	Phosphoribosyl pyrophosphate synthase-associated protein 1 OS=Mus musculus OX=10090 GN=Prpsap1 PE=1 SV=1	PRPSAP1	9
PEAPPPPLEPA	Cell cycle and apoptosis regulator protein 2 OS=Mus musculus OX=10090 GN=Ccar2 PE=1 SV=2	CCAR2	11			LGGTLNTA	Solute carrier family 22 member 18 OS=Mus musculus OX=10090 GN=Slc22a18 PE=1 SV=2	SLC22A18	8
PEKAPFCPIL	P2X purinoceptor 3 OS=Mus musculus OX=10090 GN=P2rx3 PE=2 SV=1	P2RX3	10			LGSRLYGP	Serpin H1 OS=Mus musculus OX=10090 GN=Serpinh1 PE=1 SV=3	SERPINH1	8
PEKIGQVHHA	Leucyl-cystinyl aminopeptidase OS=Mus musculus OX=10090 GN=Lnpep PE=1 SV=1	LNPEP	10			LKVKGNVF	60S ribosomal protein L19 OS=Mus musculus OX=10090 GN=Rpl19 PE=1 SV=1	RPL19	8
PEKMPRTLQ	Decorin OS=Mus musculus OX=10090 GN=Dcn PE=1 SV=1	DCN	9			LLSEDTAADGGP	Muskelin OS=Mus musculus OX=10090 GN=Mkln1 PE=1 SV=1	MKLN1	12
PEPAKSAP	Histone H2B type 1-F/J/L OS=Mus musculus OX=10090 GN=H2bc7 PE=1 SV=2	H2BC7	8			LNGKLTGMAF	Glyceraldehyde-3-phosphate dehydrogenase OS=Mus musculus OX=10090 GN=Gapdh PE=1 SV=2	GAPDH	10
PEPAKSAPAPK	Histone H2B type 1-F/J/L OS=Mus musculus OX=10090 GN=H2bc7 PE=1 SV=2	H2BC7	11			LNVKTVSETP	Serine/threonine-protein kinase PAK 1 OS=Mus musculus OX=10090 GN=Pak1 PE=1 SV=1	PAK1	10
PEPLFRSVGN	Microtubule-associated protein 1B OS=Mus musculus OX=10090 GN=Map1b PE=1 SV=2	MAP1B	10			LQDTKISN	Lamina-associated polypeptide 2, isoforms beta/delta/epsilon/gamma OS=Mus musculus OX=10090 GN=Tmpo PE=1 SV=4	TMPO	8
PGGGLAAGLVSA	Ral GTPase-activating protein subunit alpha-1 OS=Mus musculus OX=10090 GN=Ralgapa1 PE=1 SV=1	RALGAPA1	12			LRDNSTMGY	Heat shock protein HSP 90-alpha OS=Mus musculus OX=10090 GN=Hsp90aa1 PE=1 SV=4;Heat shock protein HSP 90-beta OS=Mus musculus OX=10090 GN=Hsp90ab1 PE=1 SV=3	HSP90AA1	9
PGKEHKIMVGS	5'-AMP-activated protein kinase subunit beta-2 OS=Mus musculus OX=10090 GN=Prkab2 PE=1 SV=1	PRKAB2	11			LRELTVGSQ	Nuclear pore complex protein Nup98-Nup96 OS=Mus musculus OX=10090 GN=Nup98 PE=1 SV=2	NUP98	9
PLPVLGLGGL	Dual specificity protein phosphatase 6 OS=Mus musculus OX=10090 GN=Dusp6 PE=1 SV=1	DUSP6	10			LREWLVAVK	Procollagen galactosyltransferase 1 OS=Mus musculus OX=10090 GN=Colgalt1 PE=1 SV=2	COLGALT1	9
PMYRPRPANP	Cadherin-3 OS=Mus musculus OX=10090 GN=Cdh3 PE=1 SV=2	CDH3	10			LRGGAGVGSM	40S ribosomal protein S19 OS=Mus musculus OX=10090 GN=Rps19 PE=1 SV=3	RPS19	10
PPLLAARLVPP	RNA-binding protein 27 OS=Mus musculus OX=10090 GN=Rbm27 PE=1 SV=3	RBM27	11			LSKEDDVRQY	40S ribosomal protein S6 OS=Mus musculus OX=10090 GN=Rps6 PE=1 SV=1	RPS6	10
PPPLGGVLPP	Disheveled-associated activator of morphogenesis 1 OS=Mus musculus OX=10090 GN=Daam1 PE=1 SV=4	DAAM1	10			LSQPRLTY	V-type proton ATPase subunit B, brain isoform OS=Mus musculus OX=10090 GN=Atp6v1b2 PE=1 SV=1	ATP6V1B2	8
PRPLVSYSPAPR	Voltage-dependent P/Q-type calcium channel subunit alpha-1A OS=Mus musculus OX=10090 GN=Cacna1a PE=1 SV=2	CACNA1A	12			LTRDETNY	Receptor of activated protein C kinase 1 OS=Mus musculus OX=10090 GN=Rack1 PE=1 SV=3	RACK1	8
PSKSLKSARP	Zinc finger protein 609 OS=Mus musculus OX=10090 GN=Znf609 PE=1 SV=2	ZNF609	10			LYHEMIESGVIN	ATP synthase subunit beta, mitochondrial OS=Mus musculus OX=10090 GN=Atp5f1b PE=1 SV=2	ATP5F1B	12
PSSIGSMALT	Hyccin OS=Mus musculus OX=10090 GN=Fam126a PE=1 SV=3	FAM126A	10			LYSLPRGAVK	UDP-galactose translocator OS=Mus musculus OX=10090 GN=Slc35a2 PE=1 SV=1	SLC35A2	10
PSTAAPINVASV	Zinc finger CCCH domain-containing protein 6 OS=Mus musculus OX=10090 GN=Zc3h6 PE=2 SV=2	ZC3H6	12			MAASFPEGVP	tRNA N(3)-methylcytidine methyltransferase METTL2 OS=Mus musculus OX=10090 GN=Mettl2 PE=1 SV=2	METTL2	10
PVAPIKPP	Polyhomeotic-like protein 1 OS=Mus musculus OX=10090 GN=Phc1 PE=1 SV=2	PHC1	8			MAIEEQVAVIY	ATP synthase subunit alpha, mitochondrial OS=Mus musculus OX=10090 GN=Atp5f1a PE=1 SV=1	ATP5F1A	11
PVLPRAAP	Tudor domain-containing protein 6 OS=Mus musculus OX=10090 GN=Tdrd6 PE=1 SV=1	TDRD6	8			MFGGSGTSSRP	Vimentin OS=Mus musculus OX=10090 GN=Vim PE=1 SV=3	VIM	11
QDVRRVSGVAP	Wilms tumor protein homolog OS=Mus musculus OX=10090 GN=Wt1 PE=1 SV=1	WT1	11			MGGPYGGGNYGP	Heterogeneous nuclear ribonucleoproteins A2/B1 OS=Mus musculus OX=10090 GN=Hnrnpa2b1 PE=1 SV=2	HNRNPA2B1	12
QEIWVGVGL	ATP synthase subunit ATP5MPL, mitochondrial OS=Mus musculus OX=10090 GN=Atp5mpl PE=1 SV=1	ATP5MPL	9			MIEGRMHN	Aurora kinase B OS=Mus musculus OX=10090 GN=Aurkb PE=1 SV=2	AURKB	8
QGKLLGKPVQ	Roundabout homolog 3 OS=Mus musculus OX=10090 GN=Robo3 PE=1 SV=2	ROBO3	10			MLDKLTGVF	40S ribosomal protein S4, X isoform OS=Mus musculus OX=10090 GN=Rps4x PE=1 SV=2	RPS4X	9
QGVLDSLSDGQ	Nesprin-1 OS=Mus musculus OX=10090 GN=Syne1 PE=1 SV=2	SYNE1	11			MLTSDQKPDVMY	26S proteasome regulatory subunit 6B OS=Mus musculus OX=10090 GN=Psmc4 PE=1 SV=2	PSMC4	12
QIDSDIDDQGAP	Histone-lysine N-methyltransferase SETD1B OS=Mus musculus OX=10090 GN=Setd1b PE=1 SV=2	SETD1B	12			MLVSTALDP	Proline-rich protein 12 OS=Mus musculus OX=10090 GN=Prr12 PE=1 SV=1	PRR12	9
QIGDKEGALTA	26S proteasome non-ATPase regulatory subunit 6 OS=Mus musculus OX=10090 GN=Psmd6 PE=1 SV=1	PSMD6	11			MPFRAPTKPP	ELL-associated factor 1 OS=Mus musculus OX=10090 GN=Eaf1 PE=1 SV=2	EAF1	10
QKKTGAVRI	Protein RRP5 homolog OS=Mus musculus OX=10090 GN=Pdcd11 PE=1 SV=2	PDCD11	9			MVEKVPDSTY	26S proteasome regulatory subunit 8 OS=Mus musculus OX=10090 GN=Psmc5 PE=1 SV=1	PSMC5	10
QKRSTPLK	Phosphofurin acidic cluster sorting protein 1 OS=Mus musculus OX=10090 GN=Pacs1 PE=1 SV=2	PACS1	8			NAGVEGSLIVEK	60 kDa heat shock protein, mitochondrial OS=Mus musculus OX=10090 GN=Hspd1 PE=1 SV=1	HSPD1	12
QRSRNHRTGD	Myeloid leukemia factor 2 OS=Mus musculus OX=10090 GN=Mlf2 PE=1 SV=1	MLF2	10			NCLRLGSM	Nucleoporin NUP188 homolog OS=Mus musculus OX=10090 GN=Nup188 PE=1 SV=2	NUP188	8
QTVAVGVIK	Elongation factor 1-alpha 1 OS=Mus musculus OX=10090 GN=Eef1a1 PE=1 SV=3	EEF1A1	9			NDESPLGLR	Rho guanine nucleotide exchange factor 2 OS=Mus musculus OX=10090 GN=Arhgef2 PE=1 SV=4	ARHGEF2	9
RAAGPGPP	A disintegrin and metalloproteinase with thrombospondin motifs 18 OS=Mus musculus OX=10090 GN=Adamts18 PE=2 SV=2	ADAMTS18	8			NDEVAFRKF	40S ribosomal protein S3a OS=Mus musculus OX=10090 GN=Rps3a PE=1 SV=3	RPS3A	9
RASGAVGL	Isovaleryl-CoA dehydrogenase, mitochondrial OS=Mus musculus OX=10090 GN=Ivd PE=1 SV=1	IVD	8			NEATGGKYVP	Tubulin beta-5 chain OS=Mus musculus OX=10090 GN=Tubb5 PE=1 SV=1	TUBB5	10
RASLCPAGGGP	Egl nine homolog 1 OS=Mus musculus OX=10090 GN=Egln1 PE=1 SV=2	EGLN1	11			NEATGGKYVPR	Tubulin beta-5 chain OS=Mus musculus OX=10090 GN=Tubb5 PE=1 SV=1	TUBB5	11
RASTQAPAP	Neuroligin-3 OS=Mus musculus OX=10090 GN=Nlgn3 PE=1 SV=2	NLGN3	9			NEDNGIIKAF	60S ribosomal protein L4 OS=Mus musculus OX=10090 GN=Rpl4 PE=1 SV=3	RPL4	10
RDKVGLDLG	Semaphorin-4F OS=Mus musculus OX=10090 GN=Sema4f PE=1 SV=2	SEMA4F	9			NEYNGSYVP	Extracellular sulfatase Sulf-2 OS=Mus musculus OX=10090 GN=Sulf2 PE=2 SV=2	SULF2	9
RDRPKLLVA	Spatacsin OS=Mus musculus OX=10090 GN=Spg11 PE=1 SV=3	SPG11	9			NFASHAIVEDNV	GPI ethanolamine phosphate transferase 3 OS=Mus musculus OX=10090 GN=Pigo PE=1 SV=2	PIGO	12
RDSASWLQ	RNA exonuclease 1 homolog OS=Mus musculus OX=10090 GN=Rexo1 PE=1 SV=1	REXO1	8			NFMIIGGGMAY	Phosphoglycerate kinase 2 OS=Mus musculus OX=10090 GN=Pgk2 PE=1 SV=4	PGK2	11
REAIEHITRIVR	Dynein heavy chain 2, axonemal OS=Mus musculus OX=10090 GN=Dnah2 PE=1 SV=1	DNAH2	12			NHPGQISAG	Elongation factor 1-alpha 1 OS=Mus musculus OX=10090 GN=Eef1a1 PE=1 SV=3	EEF1A1	9
RENEIKTGGLM	Protein phosphatase 1 regulatory subunit 37 OS=Mus musculus OX=10090 GN=Ppp1r37 PE=1 SV=1	PPP1R37	11			NHPGQISAGYAP	Elongation factor 1-alpha 1 OS=Mus musculus OX=10090 GN=Eef1a1 PE=1 SV=3	EEF1A1	12
RERQAALS	DENN domain-containing protein 1A OS=Mus musculus OX=10090 GN=Dennd1a PE=1 SV=2	DENND1A	8			NLSKEDDVRQY	40S ribosomal protein S6 OS=Mus musculus OX=10090 GN=Rps6 PE=1 SV=1	RPS6	11
RFTRSGGNAT	Neurexin-2 OS=Mus musculus OX=10090 GN=Nrxn2 PE=1 SV=1;Neurexin-1 OS=Mus musculus OX=10090 GN=Nrxn1 PE=1 SV=3	NRXN2	10			NMNRVTVAF	Deleted in malignant brain tumors 1 protein OS=Mus musculus OX=10090 GN=Dmbt1 PE=1 SV=2	DMBT1	9
RGDDVLLP	Semaphorin-4G OS=Mus musculus OX=10090 GN=Sema4g PE=1 SV=1	SEMA4G	8			NRVVDLMAY	Glyceraldehyde-3-phosphate dehydrogenase OS=Mus musculus OX=10090 GN=Gapdh PE=1 SV=2	GAPDH	9
RGGAGVGSM	40S ribosomal protein S19 OS=Mus musculus OX=10090 GN=Rps19 PE=1 SV=3	RPS19	9			NSNSHSSTF	Glyceraldehyde-3-phosphate dehydrogenase OS=Mus musculus OX=10090 GN=Gapdh PE=1 SV=2	GAPDH	9
RGLVKKTA	Protein ERGIC-53-like OS=Mus musculus OX=10090 GN=Lman1l PE=2 SV=2	LMAN1L	8			NTKESYDDVSSF	Probable rRNA-processing protein EBP2 OS=Mus musculus OX=10090 GN=Ebna1bp2 PE=2 SV=1	EBNA1BP2	12
RGLVKKTAK	Protein ERGIC-53-like OS=Mus musculus OX=10090 GN=Lman1l PE=2 SV=2	LMAN1L	9			NTTSAVTVK	60S ribosomal protein L37a OS=Mus musculus OX=10090 GN=Rpl37a PE=1 SV=2	RPL37A	9
RGPAEESSSW	Eukaryotic translation initiation factor 3 subunit A OS=Mus musculus OX=10090 GN=Eif3a PE=1 SV=5	EIF3A	10			NVLKVTKAAGTK	40S ribosomal protein S11 OS=Mus musculus OX=10090 GN=Rps11 PE=1 SV=3	RPS11	12
RGPAPAGGPAPA	Nischarin OS=Mus musculus OX=10090 GN=Nisch PE=1 SV=2	NISCH	12			NVTQHAVGIIVN	60S ribosomal protein L21 OS=Mus musculus OX=10090 GN=Rpl21 PE=1 SV=3	RPL21	12
RITLAEALLH	Dual specificity protein kinase CLK3 OS=Mus musculus OX=10090 GN=Clk3 PE=1 SV=2	CLK3	10			PAANTKIGPR	40S ribosomal protein S8 OS=Mus musculus OX=10090 GN=Rps8 PE=1 SV=2	RPS8	10
RLAQSLSK	MHC class II transactivator OS=Mus musculus OX=10090 GN=Ciita PE=2 SV=2	CIITA	8			PDKNSSPDQP	Stonin-1 OS=Mus musculus OX=10090 GN=Ston1 PE=1 SV=2	STON1	10
RLCGKMEPQ	E3 ubiquitin-protein ligase HECTD1 OS=Mus musculus OX=10090 GN=Hectd1 PE=1 SV=2	HECTD1	9			PEAPPPALPAGA	Ryanodine receptor 1 OS=Mus musculus OX=10090 GN=Ryr1 PE=1 SV=1	RYR1	12
RLGVPVDPRK	BTB/POZ domain-containing protein KCTD3 OS=Mus musculus OX=10090 GN=Kctd3 PE=1 SV=1	KCTD3	10			PEAPRNFYP	Collagen and calcium-binding EGF domain-containing protein 1 OS=Mus musculus OX=10090 GN=Ccbe1 PE=2 SV=2	CCBE1	9
RLLGTEFQV	Membrane-associated transporter protein OS=Mus musculus OX=10090 GN=Slc45a2 PE=1 SV=1	SLC45A2	9			PEPAALTAGGPQ	Gamma-tubulin complex component 6 OS=Mus musculus OX=10090 GN=Tubgcp6 PE=1 SV=1	TUBGCP6	12
RMFGRVQSIP	AT-rich interactive domain-containing protein 2 OS=Mus musculus OX=10090 GN=Arid2 PE=1 SV=1	ARID2	10			PGFVPRGWK	Palmitoyltransferase ZDHHC6 OS=Mus musculus OX=10090 GN=Zdhhc6 PE=1 SV=1	ZDHHC6	9
RMSRGSVGP	Proline-rich transmembrane protein 3 OS=Mus musculus OX=10090 GN=Prrt3 PE=1 SV=1	PRRT3	9			PGHLQEGF	Plasminogen activator inhibitor 1 RNA-binding protein OS=Mus musculus OX=10090 GN=Serbp1 PE=1 SV=2	SERBP1	8
RMVASMSKR	Kelch-like protein 20 OS=Mus musculus OX=10090 GN=Klhl20 PE=2 SV=2	KLHL20	9			PIRPDIVNF	60S ribosomal protein L4 OS=Mus musculus OX=10090 GN=Rpl4 PE=1 SV=3	RPL4	9
RPGELVLD	Crossover junction endonuclease MUS81 OS=Mus musculus OX=10090 GN=Mus81 PE=1 SV=2	MUS81	8			PKPHSEAGTAF	Pyruvate kinase PKM OS=Mus musculus OX=10090 GN=Pkm PE=1 SV=4	PKM	11
RPYSSGPV	Kalirin OS=Mus musculus OX=10090 GN=Kalrn PE=1 SV=1	KALRN	8			PLLQQPVQ	Zinc finger protein 800 OS=Mus musculus OX=10090 GN=Znf800 PE=1 SV=1	ZNF800	8
RQASGKKSRRP	Heat-stable enterotoxin receptor OS=Mus musculus OX=10090 GN=Gucy2c PE=2 SV=1	GUCY2C	11			PMLPASHYGGP	Thyroid receptor-interacting protein 6 OS=Mus musculus OX=10090 GN=Trip6 PE=1 SV=1	TRIP6	11
RQSARECRARK	cAMP-responsive element-binding protein-like 2 OS=Mus musculus OX=10090 GN=Crebl2 PE=1 SV=1	CREBL2	11			PMMVTKQENI	Cadherin-13 OS=Mus musculus OX=10090 GN=Cdh13 PE=1 SV=2	CDH13	10
RRKFIEAA	COP9 signalosome complex subunit 4 OS=Mus musculus OX=10090 GN=Cops4 PE=1 SV=1	COPS4	8			PPPPALVPGY	Fidgetin OS=Mus musculus OX=10090 GN=Fign PE=1 SV=1	FIGN	10
RRKQPIDHRSI	Interleukin-1 receptor-like 1 OS=Mus musculus OX=10090 GN=Il1rl1 PE=1 SV=2	IL1RL1	11			PPSAPPLAPPLP	Formin-like protein 1 OS=Mus musculus OX=10090 GN=Fmnl1 PE=1 SV=1	FMNL1	12
RRSAGELP	SH2B adapter protein 3 OS=Mus musculus OX=10090 GN=Sh2b3 PE=1 SV=2	SH2B3	8			PRKIEEIKDF	60S ribosomal protein L38 OS=Mus musculus OX=10090 GN=Rpl38 PE=1 SV=3	RPL38	10
RSAVFQQPV	Protein argonaute-1 OS=Mus musculus OX=10090 GN=Ago1 PE=1 SV=2	AGO1	9			PSAADVLLSVM	Guanylate cyclase D OS=Mus musculus OX=10090 GN=Gucy2d PE=2 SV=1	GUCY2D	11
RSPAIKKSQ	Pleckstrin homology domain-containing family S member 1 OS=Mus musculus OX=10090 GN=Plekhs1 PE=2 SV=2	PLEKHS1	9			PSHLSTVTLEDL	Coiled-coil domain-containing protein 154 OS=Mus musculus OX=10090 GN=Ccdc154 PE=2 SV=3	CCDC154	12
RSQKPVVVKR	60S ribosomal protein L28 OS=Mus musculus OX=10090 GN=Rpl28 PE=1 SV=2	RPL28	10			PSKGPLQSVQVF	40S ribosomal protein S16 OS=Mus musculus OX=10090 GN=Rps16 PE=1 SV=4	RPS16	12
RSRPETGRP	40S ribosomal protein S10 OS=Mus musculus OX=10090 GN=Rps10 PE=1 SV=1	RPS10	9			PVEIKSFY	Asparagine--tRNA ligase, cytoplasmic OS=Mus musculus OX=10090 GN=NARS1 PE=1 SV=2	NARS1	8
RSSVSKEV	DNA polymerase zeta catalytic subunit OS=Mus musculus OX=10090 GN=Rev3l PE=1 SV=3	REV3L	8			PYGGGNYGPGG	Heterogeneous nuclear ribonucleoproteins A2/B1 OS=Mus musculus OX=10090 GN=Hnrnpa2b1 PE=1 SV=2	HNRNPA2B1	11
RSYSEILT	Ectonucleotide pyrophosphatase/phosphodiesterase family member 2 OS=Mus musculus OX=10090 GN=Enpp2 PE=1 SV=3	ENPP2	8			QAGLADQQN	Arf-GAP domain and FG repeat-containing protein 2 OS=Mus musculus OX=10090 GN=Agfg2 PE=1 SV=1	AGFG2	9
RTDLEPAP	Inositol-trisphosphate 3-kinase C OS=Mus musculus OX=10090 GN=Itpkc PE=1 SV=1	ITPKC	8			QALRDNSTMGY	Heat shock protein HSP 90-alpha OS=Mus musculus OX=10090 GN=Hsp90aa1 PE=1 SV=4;Heat shock protein HSP 90-beta OS=Mus musculus OX=10090 GN=Hsp90ab1 PE=1 SV=3	HSP90AA1	11
RTFLDDPI	Cytoplasmic FMR1-interacting protein 1 OS=Mus musculus OX=10090 GN=Cyfip1 PE=1 SV=1	CYFIP1	8			QATSLAGH	Solute carrier family 22 member 22 OS=Mus musculus OX=10090 GN=Slc22a22 PE=1 SV=1	SLC22A22	8
RTIGISVDP	60S ribosomal protein L13 OS=Mus musculus OX=10090 GN=Rpl13 PE=1 SV=3	RPL13	9			QIFRPDNF	Tubulin beta-5 chain OS=Mus musculus OX=10090 GN=Tubb5 PE=1 SV=1	TUBB5	8
RTIGISVDPRR	60S ribosomal protein L13 OS=Mus musculus OX=10090 GN=Rpl13 PE=1 SV=3	RPL13	11			QKAPTKEF	Syndecan-2 OS=Mus musculus OX=10090 GN=Sdc2 PE=1 SV=1	SDC2	8
RTQAPAVATT	40S ribosomal protein S2 OS=Mus musculus OX=10090 GN=Rps2 PE=1 SV=3	RPS2	10			QLFHPEQLITG	Tubulin alpha-8 chain OS=Mus musculus OX=10090 GN=Tuba8 PE=1 SV=1;Tubulin alpha-1A chain OS=Mus musculus OX=10090 GN=Tuba1a PE=1 SV=1	TUBA8	11
RTVGVSKKK	40S ribosomal protein S18 OS=Mus musculus OX=10090 GN=Rps18 PE=1 SV=3	RPS18	9			QRKIQPSTIY	Probable G-protein coupled receptor 45 OS=Mus musculus OX=10090 GN=Gpr45 PE=2 SV=1	GPR45	10
RVPTPNVSVVD	Glyceraldehyde-3-phosphate dehydrogenase OS=Mus musculus OX=10090 GN=Gapdh PE=1 SV=2	GAPDH	11			QSVLDLMTFT	Cystic fibrosis transmembrane conductance regulator OS=Mus musculus OX=10090 GN=Cftr PE=1 SV=2	CFTR	10
RYSRSDAAKRL	Neurogenic locus notch homolog protein 1 OS=Mus musculus OX=10090 GN=Notch1 PE=1 SV=3	NOTCH1	11			RCSPFQSAR	Fidgetin-like protein 1 OS=Mus musculus OX=10090 GN=Fignl1 PE=1 SV=1	FIGNL1	9
SETGAGKHVPR	Tubulin alpha-1A chain OS=Mus musculus OX=10090 GN=Tuba1a PE=1 SV=1	TUBA1A	11			RCVPVILELT	ATP-dependent DNA helicase PIF1 OS=Mus musculus OX=10090 GN=Pif1 PE=1 SV=2	PIF1	10
SGDAAIVDMVP	Elongation factor 1-alpha 1 OS=Mus musculus OX=10090 GN=Eef1a1 PE=1 SV=3	EEF1A1	11			RFPSGNQGGAGP	Transitional endoplasmic reticulum ATPase OS=Mus musculus OX=10090 GN=Vcp PE=1 SV=4	VCP	12
SGGKDVETR	PTB domain-containing engulfment adapter protein 1 OS=Mus musculus OX=10090 GN=Gulp1 PE=1 SV=1	GULP1	9			RGDDSFGDK	Eukaryotic translation initiation factor 4B OS=Mus musculus OX=10090 GN=Eif4b PE=1 SV=1	EIF4B	9
SGTATATRSP	Cell division cycle-associated protein 2 OS=Mus musculus OX=10090 GN=Cdca2 PE=1 SV=2	CDCA2	10			RGFLSAGF	StAR-related lipid transfer protein 8 OS=Mus musculus OX=10090 GN=Stard8 PE=1 SV=2	STARD8	8
SHTDVKVP	Cytochrome b-c1 complex subunit Rieske, mitochondrial OS=Mus musculus OX=10090 GN=Uqcrfs1 PE=1 SV=1	UQCRFS1	8			RGGGGNFGP	Heterogeneous nuclear ribonucleoproteins A2/B1 OS=Mus musculus OX=10090 GN=Hnrnpa2b1 PE=1 SV=2	HNRNPA2B1	9
SIGDGIARVH	ATP synthase subunit alpha, mitochondrial OS=Mus musculus OX=10090 GN=Atp5f1a PE=1 SV=1	ATP5F1A	10			RGGSSGAKF	60S ribosomal protein L23 OS=Mus musculus OX=10090 GN=Rpl23 PE=1 SV=1	RPL23	9
SIGLAQTL	Protein MTO1 homolog, mitochondrial OS=Mus musculus OX=10090 GN=Mto1 PE=2 SV=1	MTO1	8			RGNGLIKVNGRP	40S ribosomal protein S16 OS=Mus musculus OX=10090 GN=Rps16 PE=1 SV=4	RPS16	12
SIIQNIVGTA	Surfeit locus protein 4 OS=Mus musculus OX=10090 GN=Surf4 PE=1 SV=1	SURF4	10			RGSGGGQGSTNY	Heterogeneous nuclear ribonucleoprotein A/B OS=Mus musculus OX=10090 GN=Hnrnpab PE=1 SV=1	HNRNPAB	12
SIQGLATI	Multidrug resistance-associated protein 5 OS=Mus musculus OX=10090 GN=Abcc5 PE=1 SV=2	ABCC5	8			RIDEFESM	Ermin OS=Mus musculus OX=10090 GN=Ermn PE=1 SV=1	ERMN	8
SIQGQHTISP	Poly(rC)-binding protein 1 OS=Mus musculus OX=10090 GN=Pcbp1 PE=1 SV=1	PCBP1	10			RIDSAATSTY	Low molecular weight phosphotyrosine protein phosphatase OS=Mus musculus OX=10090 GN=Acp1 PE=1 SV=3	ACP1	10
SKATIHENMGAT	Potassium voltage-gated channel subfamily E member 2 OS=Mus musculus OX=10090 GN=Kcne2 PE=2 SV=2	KCNE2	12			RILDPEGLALG	pre-rRNA 2'-O-ribose RNA methyltransferase FTSJ3 OS=Mus musculus OX=10090 GN=Ftsj3 PE=1 SV=1	FTSJ3	11
SLEDAHHVP	Histone-lysine N-methyltransferase 2B OS=Mus musculus OX=10090 GN=Kmt2b PE=1 SV=3	KMT2B	9			RKGQVIQF	60S ribosomal protein L36a OS=Mus musculus OX=10090 GN=Rpl36a PE=3 SV=2	RPL36A	8
SLEDPQTH	Heat shock protein HSP 90-alpha OS=Mus musculus OX=10090 GN=Hsp90aa1 PE=1 SV=4;Heat shock protein HSP 90-beta OS=Mus musculus OX=10090 GN=Hsp90ab1 PE=1 SV=3	HSP90AA1	8			RKLVTDEKVSDN	Low molecular weight phosphotyrosine protein phosphatase OS=Mus musculus OX=10090 GN=Acp1 PE=1 SV=3	ACP1	12
SLGPQQSPIV	Nascent polypeptide-associated complex subunit alpha, muscle-specific form OS=Mus musculus OX=10090 GN=Naca PE=1 SV=2	NACA	10			RLEKPAKY	Glyceraldehyde-3-phosphate dehydrogenase OS=Mus musculus OX=10090 GN=Gapdh PE=1 SV=2	GAPDH	8
SLGSALRP	Vimentin OS=Mus musculus OX=10090 GN=Vim PE=1 SV=3	VIM	8			RLGWEHQA	Atrial natriuretic peptide receptor 1 OS=Mus musculus OX=10090 GN=Npr1 PE=1 SV=2	NPR1	8
SLILEAPQGFRD	InaD-like protein OS=Mus musculus OX=10090 GN=Patj PE=1 SV=2	PATJ	12			RMQSKEYPV	T-box transcription factor TBX5 OS=Mus musculus OX=10090 GN=Tbx5 PE=1 SV=2	TBX5	9
SLLLMALLP	Minor histocompatibility antigen H13 OS=Mus musculus OX=10090 GN=Hm13 PE=1 SV=1	HM13	9			RNAAEDRISR	Eukaryotic translation initiation factor 3 subunit A OS=Mus musculus OX=10090 GN=Eif3a PE=1 SV=5	EIF3A	10
SLPQRKTS	Guanylate cyclase soluble subunit alpha-1 OS=Mus musculus OX=10090 GN=Gucy1a1 PE=1 SV=2	GUCY1A1	8			RNGMILKP	60S ribosomal protein L13 OS=Mus musculus OX=10090 GN=Rpl13 PE=1 SV=3	RPL13	8
SLSASALVPDSV	Centrosomal protein of 295 kDa OS=Mus musculus OX=10090 GN=Cep295 PE=1 SV=3	CEP295	12			RNVQAEEMVEF	ATP synthase subunit alpha, mitochondrial OS=Mus musculus OX=10090 GN=Atp5f1a PE=1 SV=1	ATP5F1A	11
SLSGSFGPGGP	Rho guanine nucleotide exchange factor 17 OS=Mus musculus OX=10090 GN=Arhgef17 PE=1 SV=2	ARHGEF17	11			RQLFHPEQLITG	Tubulin alpha-8 chain OS=Mus musculus OX=10090 GN=Tuba8 PE=1 SV=1;Tubulin alpha-1A chain OS=Mus musculus OX=10090 GN=Tuba1a PE=1 SV=1	TUBA8	12
SLVNICLI	N/A	N/A	8			RQPYAVSELAG	60S ribosomal protein L4 OS=Mus musculus OX=10090 GN=Rpl4 PE=1 SV=3	RPL4	11
SMVGDRLP	Actin-like protein 9 OS=Mus musculus OX=10090 GN=Actl9 PE=1 SV=1	ACTL9	8			RQSSGASSSSF	ATP-dependent RNA helicase DDX3X OS=Mus musculus OX=10090 GN=Ddx3x PE=1 SV=3	DDX3X	11
SPGQRATLS	Forkhead box protein S1 OS=Mus musculus OX=10090 GN=Foxs1 PE=2 SV=2	FOXS1	9			RSFSTSVV	ATP synthase subunit O, mitochondrial OS=Mus musculus OX=10090 GN=Atp5po PE=1 SV=1	ATP5PO	8
SPLKSRICVP	Valacyclovir hydrolase OS=Mus musculus OX=10090 GN=Bphl PE=1 SV=1	BPHL	10			RSGQGAFGNM	60S ribosomal protein L4 OS=Mus musculus OX=10090 GN=Rpl4 PE=1 SV=3	RPL4	10
SPLVSTNGP	Homer protein homolog 3 OS=Mus musculus OX=10090 GN=Homer3 PE=1 SV=2	HOMER3	9			RSNISSPVTPT	TP53-binding protein 1 OS=Mus musculus OX=10090 GN=Tp53bp1 PE=1 SV=3	TP53BP1	11
SPSASPVVC	Follistatin-related protein 1 OS=Mus musculus OX=10090 GN=Fstl1 PE=1 SV=2	FSTL1	9			RSSYDVFQLE	Fascin OS=Mus musculus OX=10090 GN=Fscn1 PE=1 SV=4	FSCN1	10
SQLTSLDPQGP	Integrator complex subunit 1 OS=Mus musculus OX=10090 GN=Ints1 PE=1 SV=2	INTS1	11			RTATADDKKLQF	Transcription factor BTF3 OS=Mus musculus OX=10090 GN=Btf3 PE=1 SV=3	BTF3	12
SRPETGRP	40S ribosomal protein S10 OS=Mus musculus OX=10090 GN=Rps10 PE=1 SV=1	RPS10	8			RTEINKKIY	60S ribosomal protein L3 OS=Mus musculus OX=10090 GN=Rpl3 PE=1 SV=3	RPL3	9
SRSADRRRGGH	Splicing factor, arginine/serine-rich 19 OS=Mus musculus OX=10090 GN=Scaf1 PE=1 SV=1	SCAF1	11			RTGNPTGTY	Probable ATP-dependent RNA helicase DDX5 OS=Mus musculus OX=10090 GN=Ddx5 PE=1 SV=2	DDX5	9
SSASPVRKVTP	Sacsin OS=Mus musculus OX=10090 GN=Sacs PE=1 SV=2	SACS	11			RTGNPTGTYQNG	Probable ATP-dependent RNA helicase DDX5 OS=Mus musculus OX=10090 GN=Ddx5 PE=1 SV=2	DDX5	12
SSATQTPTHE	Protein shisa-6 OS=Mus musculus OX=10090 GN=Shisa6 PE=1 SV=1	SHISA6	10			RTTSDGGYSF	Inhibin alpha chain OS=Mus musculus OX=10090 GN=Inha PE=1 SV=2	INHA	10
SSLLEVVTP	Disintegrin and metalloproteinase domain-containing protein 26A OS=Mus musculus OX=10090 GN=Adam26a PE=2 SV=2	ADAM26A	9			RTVENVTVF	Synaptic vesicle membrane protein VAT-1 homolog OS=Mus musculus OX=10090 GN=Vat1 PE=1 SV=3	VAT1	9
SSPGQRATLS	Forkhead box protein S1 OS=Mus musculus OX=10090 GN=Foxs1 PE=2 SV=2	FOXS1	10			RVETGVLKP	Elongation factor 1-alpha 1 OS=Mus musculus OX=10090 GN=Eef1a1 PE=1 SV=3	EEF1A1	9
SSSKSMTQT	Hedgehog-interacting protein OS=Mus musculus OX=10090 GN=Hhip PE=1 SV=2	HHIP	9			RVITEEEKNF	60S ribosomal protein L13 OS=Mus musculus OX=10090 GN=Rpl13 PE=1 SV=3	RPL13	10
SSTPEVKA	Serine-threonine kinase receptor-associated protein OS=Mus musculus OX=10090 GN=Strap PE=1 SV=2	STRAP	8			RVPTPNVSVV	Glyceraldehyde-3-phosphate dehydrogenase OS=Mus musculus OX=10090 GN=Gapdh PE=1 SV=2	GAPDH	10
SSTSLKSM	Dual specificity tyrosine-phosphorylation-regulated kinase 2 OS=Mus musculus OX=10090 GN=Dyrk2 PE=2 SV=1	DYRK2	8			RVPTPNVSVVD	Glyceraldehyde-3-phosphate dehydrogenase OS=Mus musculus OX=10090 GN=Gapdh PE=1 SV=2	GAPDH	11
STISAQRSPGGP	SH3 and multiple ankyrin repeat domains protein 3 OS=Mus musculus OX=10090 GN=Shank3 PE=1 SV=3	SHANK3	12			RVPTPNVSVVDL	Glyceraldehyde-3-phosphate dehydrogenase OS=Mus musculus OX=10090 GN=Gapdh PE=1 SV=2	GAPDH	12
SVIRGEAF	Alpha-2-macroglobulin-P OS=Mus musculus OX=10090 GN=A2m PE=2 SV=2	A2M	8			RVVARSVRVLV	Relaxin-3 receptor 2 OS=Mus musculus OX=10090 GN=Rxfp4 PE=2 SV=1	RXFP4	11
SVSRVGSAAQT	ATP synthase subunit alpha, mitochondrial OS=Mus musculus OX=10090 GN=Atp5f1a PE=1 SV=1	ATP5F1A	11			RVVDLMAY	Glyceraldehyde-3-phosphate dehydrogenase OS=Mus musculus OX=10090 GN=Gapdh PE=1 SV=2	GAPDH	8
SVTITLAP	Phospholipid transfer protein OS=Mus musculus OX=10090 GN=Pltp PE=1 SV=1	PLTP	8			RWRAAQLIGT	Hsp70-binding protein 1 OS=Mus musculus OX=10090 GN=Hspbp1 PE=1 SV=1	HSPBP1	10
SVVPSPKVSD	Tubulin beta-4B chain OS=Mus musculus OX=10090 GN=Tubb4b PE=1 SV=1	TUBB4B	10			RYDGMVGF	Heterogeneous nuclear ribonucleoprotein K OS=Mus musculus OX=10090 GN=Hnrnpk PE=1 SV=1	HNRNPK	8
TAAAPWTA	CDK5 and ABL1 enzyme substrate 1 OS=Mus musculus OX=10090 GN=Cables1 PE=1 SV=2	CABLES1	8			RYEISESLLAQ	Synaptotagmin-like protein 4 OS=Mus musculus OX=10090 GN=Sytl4 PE=1 SV=1	SYTL4	11
TAQVIILNHPG	Elongation factor 1-alpha 1 OS=Mus musculus OX=10090 GN=Eef1a1 PE=1 SV=3	EEF1A1	11			SAINEVVTR	60S ribosomal protein L31 OS=Mus musculus OX=10090 GN=Rpl31 PE=1 SV=1	RPL31	9
TATTAPPSTAP	Transcription initiation factor TFIID subunit 6 OS=Mus musculus OX=10090 GN=Taf6 PE=1 SV=1	TAF6	11			SAINEVVTREY	60S ribosomal protein L31 OS=Mus musculus OX=10090 GN=Rpl31 PE=1 SV=1	RPL31	11
TAVGAVVTAPHG	SH2B adapter protein 2 OS=Mus musculus OX=10090 GN=Sh2b2 PE=1 SV=2	SH2B2	12			SAIQSEVARNQ	Ubiquitin carboxyl-terminal hydrolase isozyme L5 OS=Mus musculus OX=10090 GN=Uchl5 PE=1 SV=2	UCHL5	11
TDQGSTVL	Ubiquitin carboxyl-terminal hydrolase isozyme L5 OS=Mus musculus OX=10090 GN=Uchl5 PE=1 SV=2	UCHL5	8			SAPRHGSL	60S ribosomal protein L3 OS=Mus musculus OX=10090 GN=Rpl3 PE=1 SV=3	RPL3	8
TELNYKNTE	Ig gamma-2A chain C region, membrane-bound form OS=Mus musculus OX=10090 GN=Igh-1a PE=1 SV=3	IGH-1A	9			SCSPRYGIFAP	CAP-Gly domain-containing linker protein 4 OS=Mus musculus OX=10090 GN=Clip4 PE=1 SV=1	CLIP4	11
TELNYKNTEPVL	Ig gamma-2A chain C region, membrane-bound form OS=Mus musculus OX=10090 GN=Igh-1a PE=1 SV=3	IGH-1A	12			SFADDFVR	Serpin H1 OS=Mus musculus OX=10090 GN=Serpinh1 PE=1 SV=3	SERPINH1	8
TEVCKLLG	Bloom syndrome protein homolog OS=Mus musculus OX=10090 GN=Blm PE=1 SV=1	BLM	8			SFSDYPPLGR	Elongation factor 1-alpha 1 OS=Mus musculus OX=10090 GN=Eef1a1 PE=1 SV=3	EEF1A1	10
TGAGKHVPR	Tubulin alpha-1A chain OS=Mus musculus OX=10090 GN=Tuba1a PE=1 SV=1;Tubulin alpha-4A chain OS=Mus musculus OX=10090 GN=Tuba4a PE=1 SV=1	TUBA1A	9			SGFRGSAGGP	Msx2-interacting protein OS=Mus musculus OX=10090 GN=Spen PE=1 SV=2	SPEN	10
TGISSKAMGIM	Histone H2B type 1-B OS=Mus musculus OX=10090 GN=Hist1h2bb PE=1 SV=3;Histone H2B type 2-B OS=Mus musculus OX=10090 GN=Hist2h2bb PE=1 SV=3;Histone H2B type 3-B OS=Mus musculus OX=10090 GN=Hist3h2bb PE=1 SV=3;Histone H2B type 1-F/J/L OS=Mus musculus OX=10090 GN=H2bc7 PE=1 SV=2	HIST1H2BB	11			SGGFGARDY	ATP-dependent RNA helicase DDX3X OS=Mus musculus OX=10090 GN=Ddx3x PE=1 SV=3	DDX3X	9
TGPVMPIR	60S ribosomal protein L13 OS=Mus musculus OX=10090 GN=Rpl13 PE=1 SV=3	RPL13	8			SGGSGGYGGR	Heterogeneous nuclear ribonucleoproteins A2/B1 OS=Mus musculus OX=10090 GN=Hnrnpa2b1 PE=1 SV=2	HNRNPA2B1	10
TGRRGGNP	Sphingosine 1-phosphate receptor 2 OS=Mus musculus OX=10090 GN=S1pr2 PE=1 SV=3	S1PR2	8			SGKAPPNLP	Ubiquitin-associated protein 2 OS=Mus musculus OX=10090 GN=Ubap2 PE=1 SV=1;Ubiquitin-associated protein 2-like OS=Mus musculus OX=10090 GN=Ubap2l PE=1 SV=1	UBAP2	9
TITSTLAAV	Sodium-dependent phosphate transporter 1 OS=Mus musculus OX=10090 GN=Slc20a1 PE=1 SV=1	SLC20A1	9			SGKQEITLP	Cell surface glycoprotein MUC18 OS=Mus musculus OX=10090 GN=Mcam PE=1 SV=1	MCAM	9
TLEKLGFP	Glycine N-acyltransferase-like protein Keg1 OS=Mus musculus OX=10090 GN=Keg1 PE=1 SV=1	KEG1	8			SGNFGGSR	Heterogeneous nuclear ribonucleoproteins A2/B1 OS=Mus musculus OX=10090 GN=Hnrnpa2b1 PE=1 SV=2	HNRNPA2B1	8
TLRDTLEERN	E3 ubiquitin-protein ligase TRAIP OS=Mus musculus OX=10090 GN=Traip PE=1 SV=2	TRAIP	10			SGSVKDNIAY	Antigen peptide transporter 2 OS=Mus musculus OX=10090 GN=Tap2 PE=1 SV=1	TAP2	10
TQAVLQREKP	Breast cancer type 2 susceptibility protein homolog OS=Mus musculus OX=10090 GN=Brca2 PE=1 SV=2	BRCA2	10			SGYQRDGYQQNF	Caprin-1 OS=Mus musculus OX=10090 GN=Caprin1 PE=1 SV=2	CAPRIN1	12
TQCLATCKSPGP	Rho guanine nucleotide exchange factor 10-like protein OS=Mus musculus OX=10090 GN=Arhgef10l PE=1 SV=1	ARHGEF10L	12			SIGDTEIYL	Otogelin-like protein OS=Mus musculus OX=10090 GN=Otogl PE=1 SV=1	OTOGL	9
TRAKAVRA	NAC-alpha domain-containing protein 1 OS=Mus musculus OX=10090 GN=Nacad PE=1 SV=1	NACAD	8			SKEDDVRQY	40S ribosomal protein S6 OS=Mus musculus OX=10090 GN=Rps6 PE=1 SV=1	RPS6	9
TTQRIVAPP	Dihydropyrimidinase-related protein 2 OS=Mus musculus OX=10090 GN=Dpysl2 PE=1 SV=2	DPYSL2	9			SLEDPQTH	Heat shock protein HSP 90-alpha OS=Mus musculus OX=10090 GN=Hsp90aa1 PE=1 SV=4;Heat shock protein HSP 90-beta OS=Mus musculus OX=10090 GN=Hsp90ab1 PE=1 SV=3	HSP90AA1	8
TTRTELRDR	Peroxisome proliferator-activated receptor gamma coactivator 1-alpha OS=Mus musculus OX=10090 GN=Ppargc1a PE=1 SV=1	PPARGC1A	9			SLEDPQTHS	Heat shock protein HSP 90-beta OS=Mus musculus OX=10090 GN=Hsp90ab1 PE=1 SV=3	HSP90AB1	9
TTSDVVRMHVGD	Metabotropic glutamate receptor 1 OS=Mus musculus OX=10090 GN=Grm1 PE=1 SV=2	GRM1	12			SLGSADELFK	Early endosome antigen 1 OS=Mus musculus OX=10090 GN=Eea1 PE=1 SV=2	EEA1	10
TVAVGVIK	Elongation factor 1-alpha 1 OS=Mus musculus OX=10090 GN=Eef1a1 PE=1 SV=3	EEF1A1	8			SLGSALRP	Vimentin OS=Mus musculus OX=10090 GN=Vim PE=1 SV=3	VIM	8
TVIIEQSWGSPK	60 kDa heat shock protein, mitochondrial OS=Mus musculus OX=10090 GN=Hspd1 PE=1 SV=1	HSPD1	12			SMERGYPPP	RNA-binding motif protein, X chromosome OS=Mus musculus OX=10090 GN=Rbmx PE=1 SV=1	RBMX	9
TVILANMMNGGP	Amyloid-beta A4 precursor protein-binding family A member 2 OS=Mus musculus OX=10090 GN=Apba2 PE=1 SV=2	APBA2	12			SMGTVVMEYKDN	Immunity-related GTPase family M protein 1 OS=Mus musculus OX=10090 GN=Irgm1 PE=1 SV=1	IRGM1	12
TVVNISNK	Voltage-dependent R-type calcium channel subunit alpha-1E OS=Mus musculus OX=10090 GN=Cacna1e PE=1 SV=1	CACNA1E	8			SMSADVPLVVE	Proliferating cell nuclear antigen OS=Mus musculus OX=10090 GN=Pcna PE=1 SV=2	PCNA	11
VAERLGVT	Microtubule-actin cross-linking factor 1 OS=Mus musculus OX=10090 GN=Macf1 PE=1 SV=2	MACF1	8			SNRVVDLM	Glyceraldehyde-3-phosphate dehydrogenase OS=Mus musculus OX=10090 GN=Gapdh PE=1 SV=2	GAPDH	8
VDGLKPGQR	DNA topoisomerase 2-alpha OS=Mus musculus OX=10090 GN=Top2a PE=1 SV=2	TOP2A	9			SNRVVDLMA	Glyceraldehyde-3-phosphate dehydrogenase OS=Mus musculus OX=10090 GN=Gapdh PE=1 SV=2	GAPDH	9
VDGLVVPSAL	Vacuolar protein sorting-associated protein 52 homolog OS=Mus musculus OX=10090 GN=Vps52 PE=1 SV=1	VPS52	10			SNRVVDLMAY	Glyceraldehyde-3-phosphate dehydrogenase OS=Mus musculus OX=10090 GN=Gapdh PE=1 SV=2	GAPDH	10
VDIEQRQKP	Desmoglein-2 OS=Mus musculus OX=10090 GN=Dsg2 PE=1 SV=3	DSG2	9			SPAAVINLTSE	Amyloid-beta A4 precursor protein-binding family B member 2 OS=Mus musculus OX=10090 GN=Apbb2 PE=1 SV=2	APBB2	11
VDQWHFVSSAP	Peroxisomal leader peptide-processing protease OS=Mus musculus OX=10090 GN=Tysnd1 PE=1 SV=1	TYSND1	11			SPAGQRLR	Leukotriene B4 receptor 1 OS=Mus musculus OX=10090 GN=Ltb4r PE=2 SV=1	LTB4R	8
VEDAQQMK	Forkhead-associated domain-containing protein 1 OS=Mus musculus OX=10090 GN=Fhad1 PE=2 SV=1	FHAD1	8			SPGGAYVTR	Vimentin OS=Mus musculus OX=10090 GN=Vim PE=1 SV=3	VIM	9
VEDARWTA	tRNA (uracil(54)-C(5))-methyltransferase homolog OS=Mus musculus OX=10090 GN=Trmt2b PE=2 SV=1	TRMT2B	8			SPKVSDTVVEPY	Tubulin beta-1 chain OS=Mus musculus OX=10090 GN=Tubb1 PE=1 SV=1;Tubulin beta-5 chain OS=Mus musculus OX=10090 GN=Tubb5 PE=1 SV=1	TUBB1	12
VEQVSKALP	NAC-alpha domain-containing protein 1 OS=Mus musculus OX=10090 GN=Nacad PE=1 SV=1	NACAD	9			SPNGTIRNILG	Isocitrate dehydrogenase [NADP] cytoplasmic OS=Mus musculus OX=10090 GN=Idh1 PE=1 SV=2;Isocitrate dehydrogenase [NADP], mitochondrial OS=Mus musculus OX=10090 GN=Idh2 PE=1 SV=3	IDH1	11
VESLMCEKRILA	Serine/threonine-protein kinase N1 OS=Mus musculus OX=10090 GN=Pkn1 PE=1 SV=3	PKN1	12			SQHQSSYGP	Heterogeneous nuclear ribonucleoprotein A0 OS=Mus musculus OX=10090 GN=Hnrnpa0 PE=1 SV=1	HNRNPA0	9
VEWTNNGK	Ig gamma-2A chain C region, membrane-bound form OS=Mus musculus OX=10090 GN=Igh-1a PE=1 SV=3	IGH-1A	8			SQKKTFEINP	Endoplasmin OS=Mus musculus OX=10090 GN=Hsp90b1 PE=1 SV=2	HSP90B1	10
VGDIPGVR	40S ribosomal protein S23 OS=Mus musculus OX=10090 GN=Rps23 PE=1 SV=3	RPS23	8			SQRAGLQFP	Histone H2A.Z OS=Mus musculus OX=10090 GN=H2az1 PE=1 SV=2	H2AZ1	9
VGGQGPRGMGP	Splicing factor, proline- and glutamine-rich OS=Mus musculus OX=10090 GN=Sfpq PE=1 SV=1	SFPQ	11			SQVLANGLDNK	40S ribosomal protein S18 OS=Mus musculus OX=10090 GN=Rps18 PE=1 SV=3	RPS18	11
VGIVISLVC	Adhesion G protein-coupled receptor L1 OS=Mus musculus OX=10090 GN=Adgrl1 PE=1 SV=2	ADGRL1	9			SQVLMSASFLG	Putative transporter SVOPL OS=Mus musculus OX=10090 GN=Svopl PE=2 SV=1	SVOPL	11
VGLNSTTQ	Roquin-1 OS=Mus musculus OX=10090 GN=Rc3h1 PE=1 SV=1	RC3H1	8			SSDPPFEVR	Pyruvate dehydrogenase E1 component subunit alpha, somatic form, mitochondrial OS=Mus musculus OX=10090 GN=Pdha1 PE=1 SV=1	PDHA1	9
VGLTVGYQ	Putative ATP-dependent RNA helicase DHX57 OS=Mus musculus OX=10090 GN=Dhx57 PE=1 SV=2	DHX57	8			SSGFSLEDPQTH	Heat shock protein HSP 90-alpha OS=Mus musculus OX=10090 GN=Hsp90aa1 PE=1 SV=4;Heat shock protein HSP 90-beta OS=Mus musculus OX=10090 GN=Hsp90ab1 PE=1 SV=3	HSP90AA1	12
VIDECKVTLAA	Excitatory amino acid transporter 2 OS=Mus musculus OX=10090 GN=Slc1a2 PE=1 SV=1	SLC1A2	11			SSPGGAYVTR	Vimentin OS=Mus musculus OX=10090 GN=Vim PE=1 SV=3	VIM	10
VISDSLLTLPA	Plexin-A2 OS=Mus musculus OX=10090 GN=Plxna2 PE=1 SV=2	PLXNA2	11			SSPGGAYVTRSS	Vimentin OS=Mus musculus OX=10090 GN=Vim PE=1 SV=3	VIM	12
VLDEIQFAAL	SURP and G-patch domain-containing protein 2 OS=Mus musculus OX=10090 GN=Sugp2 PE=1 SV=2	SUGP2	10			SSRFIPLK	40S ribosomal protein S15 OS=Mus musculus OX=10090 GN=Rps15 PE=1 SV=2	RPS15	8
VLYCVLEPLA	TAF6-like RNA polymerase II p300/CBP-associated factor-associated factor 65 kDa subunit 6L OS=Mus musculus OX=10090 GN=Taf6l PE=1 SV=1	TAF6L	10			SSSKDKDAYSSF	ATP-dependent RNA helicase DDX3X OS=Mus musculus OX=10090 GN=Ddx3x PE=1 SV=3	DDX3X	12
VLYVKLGA	Protein Wnt-7b OS=Mus musculus OX=10090 GN=Wnt7b PE=1 SV=1	WNT7B	8			SSSNVNGGP	Serine/threonine-protein kinase DCLK2 OS=Mus musculus OX=10090 GN=Dclk2 PE=1 SV=1	DCLK2	9
VNECLNNPPMP	Proteasomal ubiquitin receptor ADRM1 OS=Mus musculus OX=10090 GN=Adrm1 PE=1 SV=2	ADRM1	11			SSSPGGAYVTR	Vimentin OS=Mus musculus OX=10090 GN=Vim PE=1 SV=3	VIM	11
VQLKQPVFV	Chromosome-associated kinesin KIF4 OS=Mus musculus OX=10090 GN=Kif4 PE=1 SV=3	KIF4	9			SSSPGGAYVTRS	Vimentin OS=Mus musculus OX=10090 GN=Vim PE=1 SV=3	VIM	12
VQPLEVLG	Proliferation marker protein Ki-67 OS=Mus musculus OX=10090 GN=Mki67 PE=1 SV=1	MKI67	8			SSVLVFLPG	ATP-dependent RNA helicase TDRD9 OS=Mus musculus OX=10090 GN=Tdrd9 PE=1 SV=3	TDRD9	9
VQTQTQTQTH	Protein PRRC2C OS=Mus musculus OX=10090 GN=Prrc2c PE=1 SV=3	PRRC2C	10			SSVPGVRLLQ	Vimentin OS=Mus musculus OX=10090 GN=Vim PE=1 SV=3	VIM	10
VSALAQDTH	Transcriptional-regulating factor 1 OS=Mus musculus OX=10090 GN=Trerf1 PE=1 SV=1	TRERF1	9			STEDRYIVTQY	Delta(14)-sterol reductase LBR OS=Mus musculus OX=10090 GN=Lbr PE=1 SV=2	LBR	11
VSGLTKNP	Activating transcription factor 7-interacting protein 1 OS=Mus musculus OX=10090 GN=Atf7ip PE=1 SV=1	ATF7IP	8			STEPNNLK	60S ribosomal protein L28 OS=Mus musculus OX=10090 GN=Rpl28 PE=1 SV=2	RPL28	8
VSLVAASDG	Inhibitor of Bruton tyrosine kinase OS=Mus musculus OX=10090 GN=Ibtk PE=1 SV=3	IBTK	9			STTPGGTRIIY	Eukaryotic translation initiation factor 4E-binding protein 2 OS=Mus musculus OX=10090 GN=Eif4ebp2 PE=1 SV=1	EIF4EBP2	11
VSRKGSKDVVD	Transmembrane protein KIAA1109 OS=Mus musculus OX=10090 GN=Kiaa1109 PE=1 SV=4	KIAA1109	11			SVARAGQKGY	60S ribosomal protein L3 OS=Mus musculus OX=10090 GN=Rpl3 PE=1 SV=3	RPL3	10
VTERTRLLSEVT	Intraflagellar transport protein 57 homolog OS=Mus musculus OX=10090 GN=Ift57 PE=1 SV=1	IFT57	12			SVASEEVMKN	Nuclear pore complex protein Nup50 OS=Mus musculus OX=10090 GN=Nup50 PE=1 SV=3	NUP50	10
VTFEVKILPP	NADH dehydrogenase [ubiquinone] 1 alpha subcomplex assembly factor 4 OS=Mus musculus OX=10090 GN=Ndufaf4 PE=1 SV=1	NDUFAF4	10			SVNVDYSK	Cytochrome c oxidase subunit NDUFA4 OS=Mus musculus OX=10090 GN=Ndufa4 PE=1 SV=2	NDUFA4	8
VTKDGVTVAK	60 kDa heat shock protein, mitochondrial OS=Mus musculus OX=10090 GN=Hspd1 PE=1 SV=1	HSPD1	10			SVRSGPFG	Tubulin beta-5 chain OS=Mus musculus OX=10090 GN=Tubb5 PE=1 SV=1	TUBB5	8
VVADPTVPN	N/A	N/A	9			TAQPELCE	Interleukin-12 receptor subunit beta-2 OS=Mus musculus OX=10090 GN=Il12rb2 PE=1 SV=1	IL12RB2	8
VVDCRGLL	E3 ubiquitin-protein ligase SMURF1 OS=Mus musculus OX=10090 GN=Smurf1 PE=1 SV=2	SMURF1	8			TAQVIILNHPG	Elongation factor 1-alpha 1 OS=Mus musculus OX=10090 GN=Eef1a1 PE=1 SV=3	EEF1A1	11
VWDLLLGM	Transmembrane protein FAM155B OS=Mus musculus OX=10090 GN=Fam155b PE=3 SV=1	FAM155B	8			TATADDKKLQF	Transcription factor BTF3 OS=Mus musculus OX=10090 GN=Btf3 PE=1 SV=3	BTF3	11
WAEGMLGDK	E3 ubiquitin-protein ligase SH3RF3 OS=Mus musculus OX=10090 GN=Sh3rf3 PE=1 SV=2	SH3RF3	9			TDEEHALY	Cytosolic non-specific dipeptidase OS=Mus musculus OX=10090 GN=Cndp2 PE=1 SV=1	CNDP2	8
WFPGPGGLGLQ	Zinc finger protein 628 OS=Mus musculus OX=10090 GN=Znf628 PE=2 SV=2	ZNF628	11			TEDLFVLPK	0	?	9
WGAMNARVGS	Gamma-crystallin D OS=Mus musculus OX=10090 GN=Crygd PE=2 SV=3	CRYGD	10			TEDVPRKL	60S ribosomal protein L6 OS=Mus musculus OX=10090 GN=Rpl6 PE=1 SV=3	RPL6	8
WTRNAAVLTPS	Obscurin OS=Mus musculus OX=10090 GN=Obscn PE=1 SV=3	OBSCN	11			TEDVPRKLL	60S ribosomal protein L6 OS=Mus musculus OX=10090 GN=Rpl6 PE=1 SV=3	RPL6	9
						TERFGQGGAGP	Splicing factor, proline- and glutamine-rich OS=Mus musculus OX=10090 GN=Sfpq PE=1 SV=1	SFPQ	11
						TFGKKKGP	40S ribosomal protein S30 OS=Mus musculus OX=10090 GN=Fau PE=1 SV=1	FAU	8
						TFGKKKGPNANS	40S ribosomal protein S30 OS=Mus musculus OX=10090 GN=Fau PE=1 SV=1	FAU	12
						TFSSIPVSR	Cytoplasmic dynein 1 heavy chain 1 OS=Mus musculus OX=10090 GN=Dync1h1 PE=1 SV=2	DYNC1H1	9
						TGFKVGIN	Tubulin alpha-8 chain OS=Mus musculus OX=10090 GN=Tuba8 PE=1 SV=1;Tubulin alpha chain-like 3 OS=Mus musculus OX=10090 GN=Tubal3 PE=2 SV=2;Tubulin alpha-1A chain OS=Mus musculus OX=10090 GN=Tuba1a PE=1 SV=1	TUBA8	8
						TGKDISTNY	Endoplasmin OS=Mus musculus OX=10090 GN=Hsp90b1 PE=1 SV=2	HSP90B1	9
						TGKDISTNYY	Endoplasmin OS=Mus musculus OX=10090 GN=Hsp90b1 PE=1 SV=2	HSP90B1	10
						TGNSSFTWF	Sialoadhesin OS=Mus musculus OX=10090 GN=Siglec1 PE=1 SV=2	SIGLEC1	9
						THLSPAKTPPP	Lipolysis-stimulated lipoprotein receptor OS=Mus musculus OX=10090 GN=Lsr PE=1 SV=1	LSR	11
						TIEKAHSL	Helicase POLQ-like OS=Mus musculus OX=10090 GN=Helq PE=1 SV=2	HELQ	8
						TKAEKLQLL	DNA-directed RNA polymerase III subunit RPC9 OS=Mus musculus OX=10090 GN=Crcp PE=2 SV=1	CRCP	9
						TKGGPDFSNLEK	NudC domain-containing protein 2 OS=Mus musculus OX=10090 GN=Nudcd2 PE=1 SV=1	NUDCD2	12
						TLEPSEKPF	Coatomer subunit gamma-1 OS=Mus musculus OX=10090 GN=Copg1 PE=1 SV=1;Coatomer subunit gamma-2 OS=Mus musculus OX=10090 GN=Copg2 PE=1 SV=1	COPG1	9
						TLLIKTVETR	Vimentin OS=Mus musculus OX=10090 GN=Vim PE=1 SV=3	VIM	10
						TLLRDRDEL	Endoplasmic reticulum resident protein 44 OS=Mus musculus OX=10090 GN=Erp44 PE=1 SV=1	ERP44	9
						TLRSEGFDTY	Proliferating cell nuclear antigen OS=Mus musculus OX=10090 GN=Pcna PE=1 SV=2	PCNA	10
						TLSIDKGF	ATP-dependent 6-phosphofructokinase, liver type OS=Mus musculus OX=10090 GN=Pfkl PE=1 SV=4	PFKL	8
						TLVSEQTRVNA	60S ribosomal protein L27a OS=Mus musculus OX=10090 GN=Rpl27a PE=1 SV=5	RPL27A	11
						TNAVIINLA	Visual pigment-like receptor peropsin OS=Mus musculus OX=10090 GN=Rrh PE=1 SV=1	RRH	9
						TNQGTVIHF	Transcription factor BTF3 OS=Mus musculus OX=10090 GN=Btf3 PE=1 SV=3	BTF3	9
						TNTMRVVPVP	Pyruvate kinase PKM OS=Mus musculus OX=10090 GN=Pkm PE=1 SV=4	PKM	10
						TPGNRIVY	60S ribosomal protein L34 OS=Mus musculus OX=10090 GN=Rpl34 PE=1 SV=2	RPL34	8
						TRGEADRDTY	40S ribosomal protein S10 OS=Mus musculus OX=10090 GN=Rps10 PE=1 SV=1	RPS10	10
						TRNTKGGDAP	40S ribosomal protein S25 OS=Mus musculus OX=10090 GN=Rps25 PE=1 SV=1	RPS25	10
						TSGPPVSELITK	Histone H1.4 OS=Mus musculus OX=10090 GN=H1-4 PE=1 SV=2	H1-4	12
						TTDSFDDYPPR	Eukaryotic translation initiation factor 4B OS=Mus musculus OX=10090 GN=Eif4b PE=1 SV=1	EIF4B	11
						TTMEKAGAHL	Glyceraldehyde-3-phosphate dehydrogenase OS=Mus musculus OX=10090 GN=Gapdh PE=1 SV=2	GAPDH	10
						TTRSFDSEF	Cytoplasmic dynein 1 heavy chain 1 OS=Mus musculus OX=10090 GN=Dync1h1 PE=1 SV=2	DYNC1H1	9
						TVIDEVRTGTY	Tubulin alpha-1A chain OS=Mus musculus OX=10090 GN=Tuba1a PE=1 SV=1	TUBA1A	11
						TVINQTQKENL	60S ribosomal protein L35 OS=Mus musculus OX=10090 GN=Rpl35 PE=1 SV=1	RPL35	11
						TVTKTVSNDSFF	Nucleosome assembly protein 1-like 1 OS=Mus musculus OX=10090 GN=Nap1l1 PE=1 SV=2	NAP1L1	12
						TVVVLNMMQ	Protein unc-45 homolog A OS=Mus musculus OX=10090 GN=Unc45a PE=1 SV=2	UNC45A	9
						TYGVTNSGKTY	Kinesin-like protein KIF20A OS=Mus musculus OX=10090 GN=Kif20a PE=1 SV=1	KIF20A	11
						TYNTTSAVTVK	60S ribosomal protein L37a OS=Mus musculus OX=10090 GN=Rpl37a PE=1 SV=2	RPL37A	11
						VACPVLILTQ	Adenosine receptor A1 OS=Mus musculus OX=10090 GN=Adora1 PE=2 SV=4	ADORA1	10
						VAGGAGLAVPG	Polycystin-2 OS=Mus musculus OX=10090 GN=Pkd2 PE=1 SV=2	PKD2	11
						VAIMIVTY	D(1B) dopamine receptor OS=Mus musculus OX=10090 GN=Drd5 PE=2 SV=1	DRD5	8
						VDNTVRIIS	Splicing factor 3B subunit 3 OS=Mus musculus OX=10090 GN=Sf3b3 PE=1 SV=1	SF3B3	9
						VEFSMALMSKLD	Adenylate cyclase type 7 OS=Mus musculus OX=10090 GN=Adcy7 PE=1 SV=2	ADCY7	12
						VESFSDYPPLGR	Elongation factor 1-alpha 1 OS=Mus musculus OX=10090 GN=Eef1a1 PE=1 SV=3	EEF1A1	12
						VFGQSGAGNNW	Tubulin beta-5 chain OS=Mus musculus OX=10090 GN=Tubb5 PE=1 SV=1	TUBB5	11
						VGDIIPFSI	Conserved oligomeric Golgi complex subunit 5 OS=Mus musculus OX=10090 GN=Cog5 PE=1 SV=3	COG5	9
						VGDIPGVRF	40S ribosomal protein S23 OS=Mus musculus OX=10090 GN=Rps23 PE=1 SV=3	RPS23	9
						VGIVGKYGT	60S ribosomal protein L37a OS=Mus musculus OX=10090 GN=Rpl37a PE=1 SV=2	RPL37A	9
						VGRVETGVLKP	Elongation factor 1-alpha 1 OS=Mus musculus OX=10090 GN=Eef1a1 PE=1 SV=3	EEF1A1	11
						VGYQHGRTVF	Patatin-like phospholipase domain-containing protein 7 OS=Mus musculus OX=10090 GN=Pnpla7 PE=1 SV=1	PNPLA7	10
						VIDEGLTTKH	Uncharacterized protein C11orf98 homolog OS=Mus musculus OX=10090 PE=1 SV=1	?	10
						VIEDLINNY	Arf-GAP with Rho-GAP domain, ANK repeat and PH domain-containing protein 2 OS=Mus musculus OX=10090 GN=Arap2 PE=1 SV=2	ARAP2	9
						VIHDNFGIVEG	Glyceraldehyde-3-phosphate dehydrogenase OS=Mus musculus OX=10090 GN=Gapdh PE=1 SV=2	GAPDH	11
						VIRNIVEA	40S ribosomal protein S26 OS=Mus musculus OX=10090 GN=Rps26 PE=1 SV=3	RPS26	8
						VIRNIVEAA	40S ribosomal protein S26 OS=Mus musculus OX=10090 GN=Rps26 PE=1 SV=3	RPS26	9
						VITEEEKNF	60S ribosomal protein L13 OS=Mus musculus OX=10090 GN=Rpl13 PE=1 SV=3	RPL13	9
						VITEEEKNFK	60S ribosomal protein L13 OS=Mus musculus OX=10090 GN=Rpl13 PE=1 SV=3	RPL13	10
						VITEEEKNFKAF	60S ribosomal protein L13 OS=Mus musculus OX=10090 GN=Rpl13 PE=1 SV=3	RPL13	12
						VKFDAVVGY	Estradiol 17-beta-dehydrogenase 11 OS=Mus musculus OX=10090 GN=Hsd17b11 PE=1 SV=1	HSD17B11	9
						VKTDLPRY	Microtubule-associated serine/threonine-protein kinase 3 OS=Mus musculus OX=10090 GN=Mast3 PE=1 SV=3	MAST3	8
						VKVGVNGF	Glyceraldehyde-3-phosphate dehydrogenase OS=Mus musculus OX=10090 GN=Gapdh PE=1 SV=2	GAPDH	8
						VLRPPGGGSNF	Jupiter microtubule associated homolog 1 OS=Mus musculus OX=10090 GN=Jpt1 PE=1 SV=3	JPT1	11
						VNAAIATIK	Tubulin alpha-1A chain OS=Mus musculus OX=10090 GN=Tuba1a PE=1 SV=1	TUBA1A	9
						VNMDIGVSPFGP	Low-density lipoprotein receptor-related protein 2 OS=Mus musculus OX=10090 GN=Lrp2 PE=1 SV=1	LRP2	12
						VNVTTEVK	Elongation factor 1-alpha 1 OS=Mus musculus OX=10090 GN=Eef1a1 PE=1 SV=3	EEF1A1	8
						VQLTVREAINQ	Pyruvate dehydrogenase E1 component subunit beta, mitochondrial OS=Mus musculus OX=10090 GN=Pdhb PE=1 SV=1	PDHB	11
						VQTKGTGASGSF	Histone H1.4 OS=Mus musculus OX=10090 GN=H1-4 PE=1 SV=2;Histone H1.5 OS=Mus musculus OX=10090 GN=H1-5 PE=1 SV=2;Histone H1.2 OS=Mus musculus OX=10090 GN=H1-2 PE=1 SV=2	H1-4	12
						VRPPVQVY	ATP synthase subunit O, mitochondrial OS=Mus musculus OX=10090 GN=Atp5po PE=1 SV=1	ATP5PO	8
						VRTTINKNAR	60S ribosomal protein L28 OS=Mus musculus OX=10090 GN=Rpl28 PE=1 SV=2	RPL28	10
						VTKHAAENPGKY	Heterogeneous nuclear ribonucleoprotein U OS=Mus musculus OX=10090 GN=Hnrnpu PE=1 SV=1	HNRNPU	12
						VTPQNGLASGI	Zinc finger protein GLIS1 OS=Mus musculus OX=10090 GN=Glis1 PE=1 SV=2	GLIS1	11
						VTRSYTVGVTM	Serpin H1 OS=Mus musculus OX=10090 GN=Serpinh1 PE=1 SV=3	SERPINH1	11
						VTTAVLMDTAA	Krueppel-like factor 11 OS=Mus musculus OX=10090 GN=Klf11 PE=2 SV=3	KLF11	11
						VTTSTRTY	Vimentin OS=Mus musculus OX=10090 GN=Vim PE=1 SV=3	VIM	8
						VTTVGGTSFKNP	Tripeptidyl-peptidase 1 OS=Mus musculus OX=10090 GN=Tpp1 PE=1 SV=2	TPP1	12
						VVAWHGYA	Klotho OS=Mus musculus OX=10090 GN=Kl PE=1 SV=2	KL	8
						VVDRAGTF	Isocitrate dehydrogenase [NADP], mitochondrial OS=Mus musculus OX=10090 GN=Idh2 PE=1 SV=3	IDH2	8
						VVLLAMCGPLV	T-cell surface glycoprotein CD5 OS=Mus musculus OX=10090 GN=Cd5 PE=1 SV=1	CD5	11
						VVPTFGKKKGP	40S ribosomal protein S30 OS=Mus musculus OX=10090 GN=Fau PE=1 SV=1	FAU	11
						WEVAAPTDGN	Extracellular matrix protein FRAS1 OS=Mus musculus OX=10090 GN=Fras1 PE=1 SV=2	FRAS1	10
						WGAMNARVGS	0	?	10
						YAVSELAGH	60S ribosomal protein L4 OS=Mus musculus OX=10090 GN=Rpl4 PE=1 SV=3	RPL4	9
						YDESGPSIVH	Actin, cytoplasmic 1 OS=Mus musculus OX=10090 GN=Actb PE=1 SV=1	ACTB	10
						YDRPGTAR	Heterogeneous nuclear ribonucleoprotein F OS=Mus musculus OX=10090 GN=Hnrnpf PE=1 SV=3	HNRNPF	8
						YGGGGQYF	Heterogeneous nuclear ribonucleoprotein A1 OS=Mus musculus OX=10090 GN=Hnrnpa1 PE=1 SV=2	HNRNPA1	8
						YGGGNYGP	Heterogeneous nuclear ribonucleoproteins A2/B1 OS=Mus musculus OX=10090 GN=Hnrnpa2b1 PE=1 SV=2	HNRNPA2B1	8
						YGSEATGH	Protein SFI1 homolog OS=Mus musculus OX=10090 GN=Sfi1 PE=2 SV=1	SFI1	8
						YGSGRGFGDG	Heterogeneous nuclear ribonucleoproteins A2/B1 OS=Mus musculus OX=10090 GN=Hnrnpa2b1 PE=1 SV=2	HNRNPA2B1	10
						YHDEGYGPPPP	Heterogeneous nuclear ribonucleoprotein L OS=Mus musculus OX=10090 GN=Hnrnpl PE=1 SV=2	HNRNPL	11
						YIDRINAM	Disheveled-associated activator of morphogenesis 2 OS=Mus musculus OX=10090 GN=Daam2 PE=1 SV=4	DAAM2	8
						YIGIVKQA	Heterogeneous nuclear ribonucleoprotein F OS=Mus musculus OX=10090 GN=Hnrnpf PE=1 SV=3	HNRNPF	8
						YIGIVKQAGLD	Heterogeneous nuclear ribonucleoprotein F OS=Mus musculus OX=10090 GN=Hnrnpf PE=1 SV=3	HNRNPF	11
						YKEVIAVQGP	Synaptojanin-1 OS=Mus musculus OX=10090 GN=Synj1 PE=1 SV=3	SYNJ1	10
						YKVDENGKISR	Ubiquitin-40S ribosomal protein S27a OS=Mus musculus OX=10090 GN=Rps27a PE=1 SV=2	RPS27A	11
						YLKDVTLK	60S ribosomal protein L17 OS=Mus musculus OX=10090 GN=Rpl17 PE=1 SV=3	RPL17	8
						YLRGGAGVGSM	40S ribosomal protein S19 OS=Mus musculus OX=10090 GN=Rps19 PE=1 SV=3	RPS19	11
						YNASVILTTP	Translation factor Guf1, mitochondrial OS=Mus musculus OX=10090 GN=Guf1 PE=1 SV=1	GUF1	10
						YNEATGGKYVP	Tubulin beta-5 chain OS=Mus musculus OX=10090 GN=Tubb5 PE=1 SV=1	TUBB5	11
						YNEATGGKYVPR	Tubulin beta-5 chain OS=Mus musculus OX=10090 GN=Tubb5 PE=1 SV=1	TUBB5	12
						YNIVGLRSN	Methylcrotonoyl-CoA carboxylase subunit alpha, mitochondrial OS=Mus musculus OX=10090 GN=Mccc1 PE=1 SV=2	MCCC1	9
						YQIVERPQR	Spartin OS=Mus musculus OX=10090 GN=Spart PE=1 SV=1	SPART	9
						YQIVLELHFSH	Protein O-mannosyl-transferase 1 OS=Mus musculus OX=10090 GN=Pomt1 PE=1 SV=1	POMT1	11
						YQLEELMA	Ciliary neurotrophic factor OS=Mus musculus OX=10090 GN=Cntf PE=2 SV=1	CNTF	8
						YQVAKGMAFL	Mast/stem cell growth factor receptor Kit OS=Mus musculus OX=10090 GN=Kit PE=1 SV=3	KIT	10
						YQVINWRL	UDP-glucuronosyltransferase 3A1 OS=Mus musculus OX=10090 GN=Ugt3a1 PE=1 SV=1	UGT3A1	8
						YSSSPGGAYVTR	Vimentin OS=Mus musculus OX=10090 GN=Vim PE=1 SV=3	VIM	12
						YTLSVALPG	Putative methyltransferase C9orf114 homolog OS=Mus musculus OX=10090 GN=Spout1 PE=1 SV=1	SPOUT1	9
						YVAARHTTTY	Adhesion G protein-coupled receptor L1 OS=Mus musculus OX=10090 GN=Adgrl1 PE=1 SV=2	ADGRL1	10
