# Supplementary material for: Dendritic cell-mediated cross presentation of tumor-derived peptides is biased against plasma membrane proteins
Source: HighWire-hosted journal article supplement (doi:10.1136/jitc-2021-004159), 2022-07-01

Supplemental Figure 1

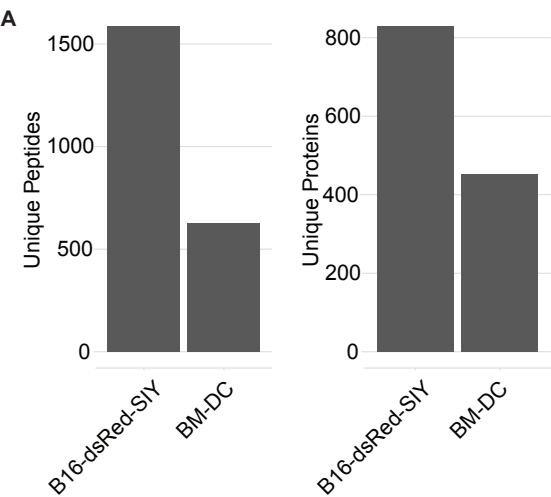

Supplemental Figure 2

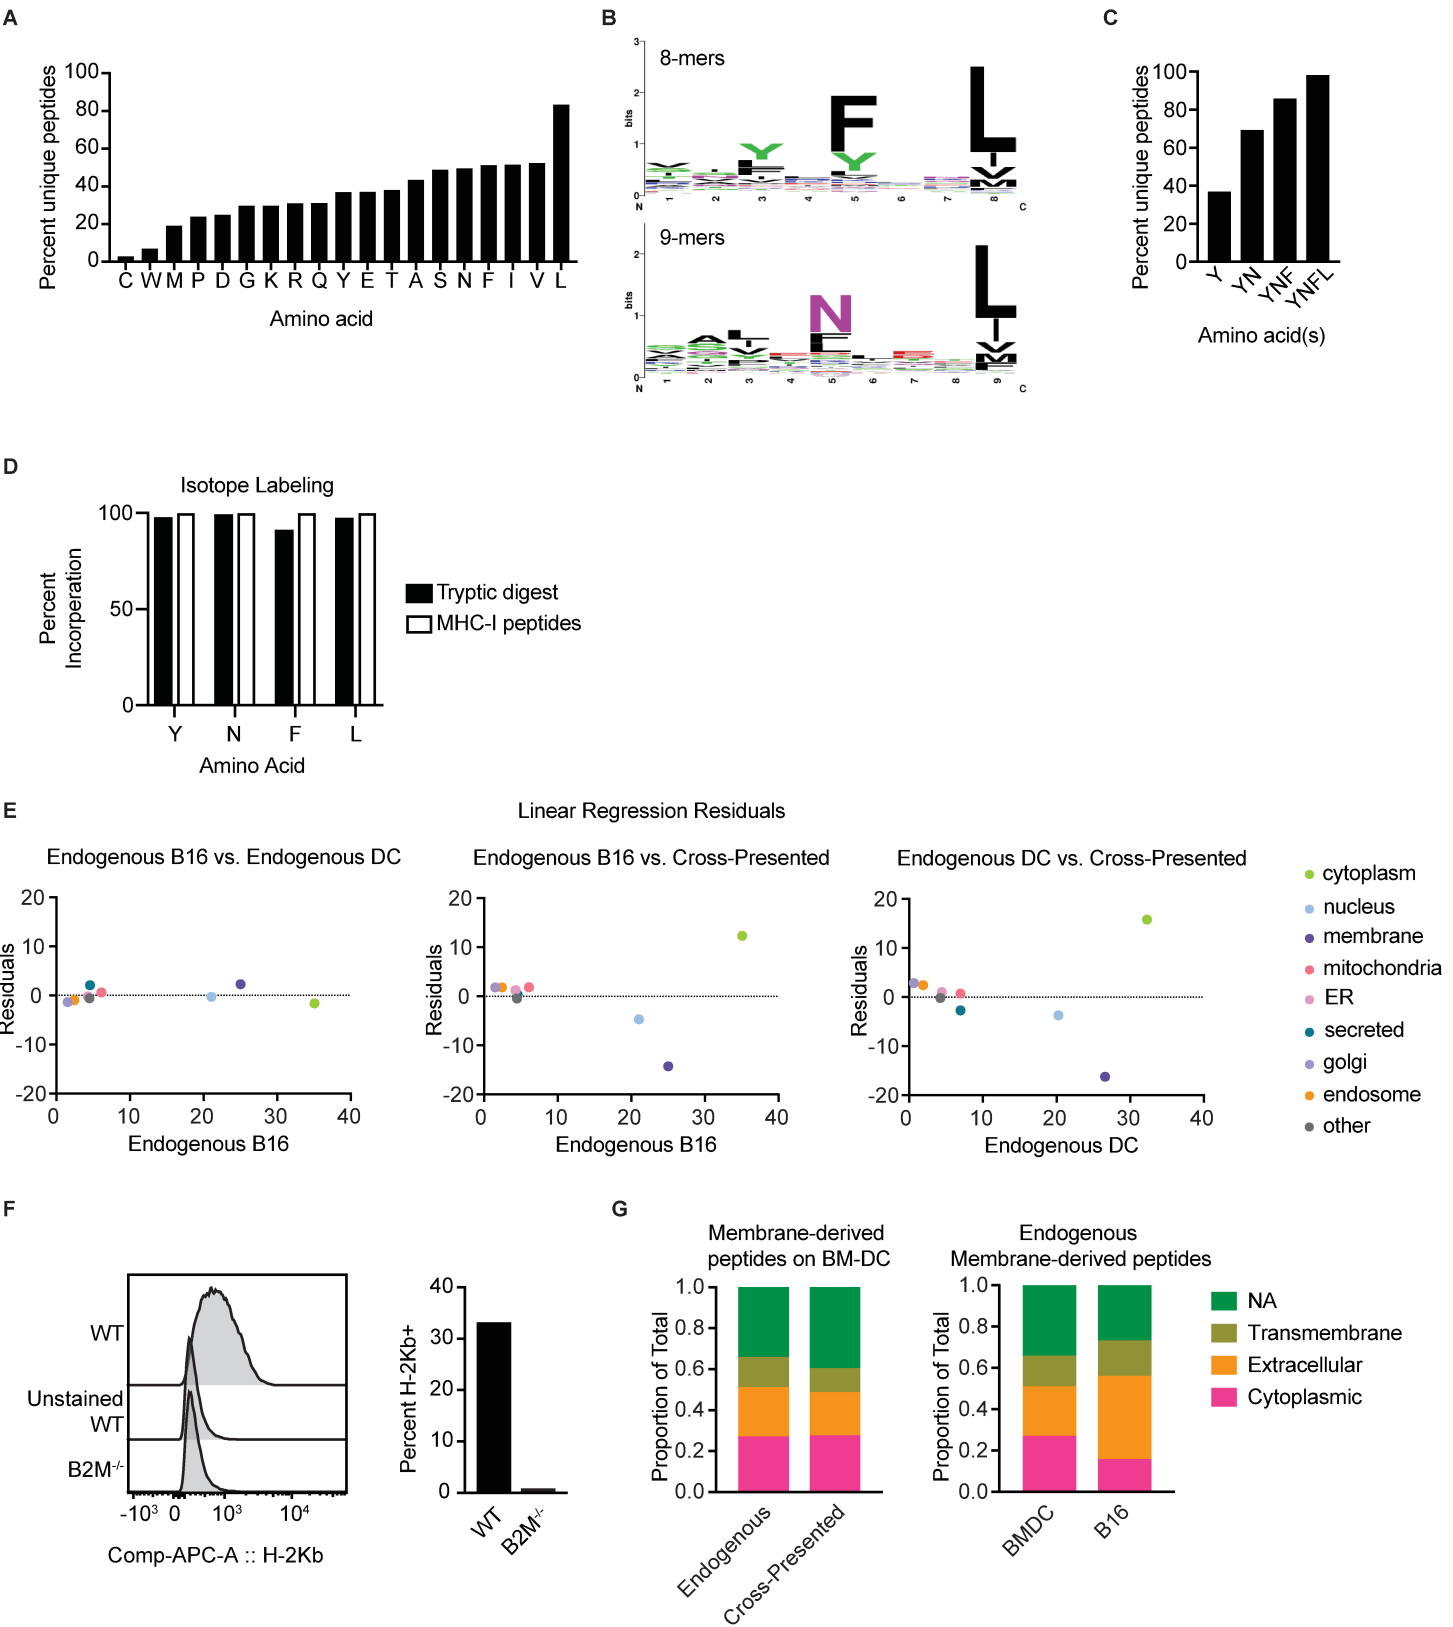

Supplemental Figure 3

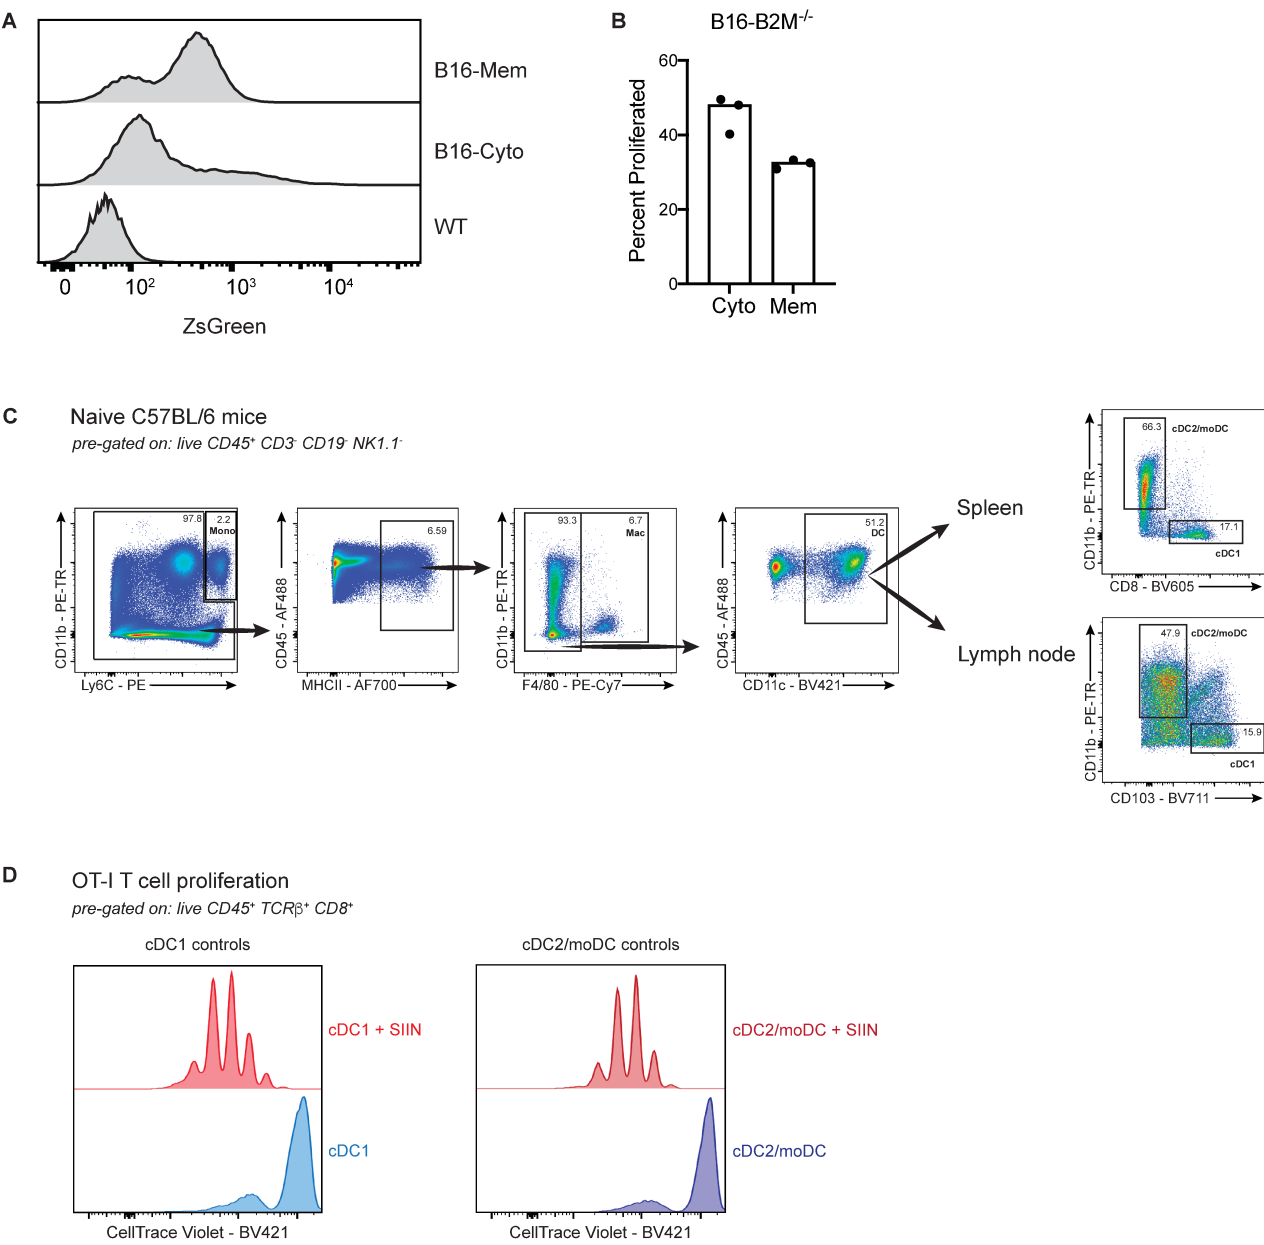

Supplemental Figure 4

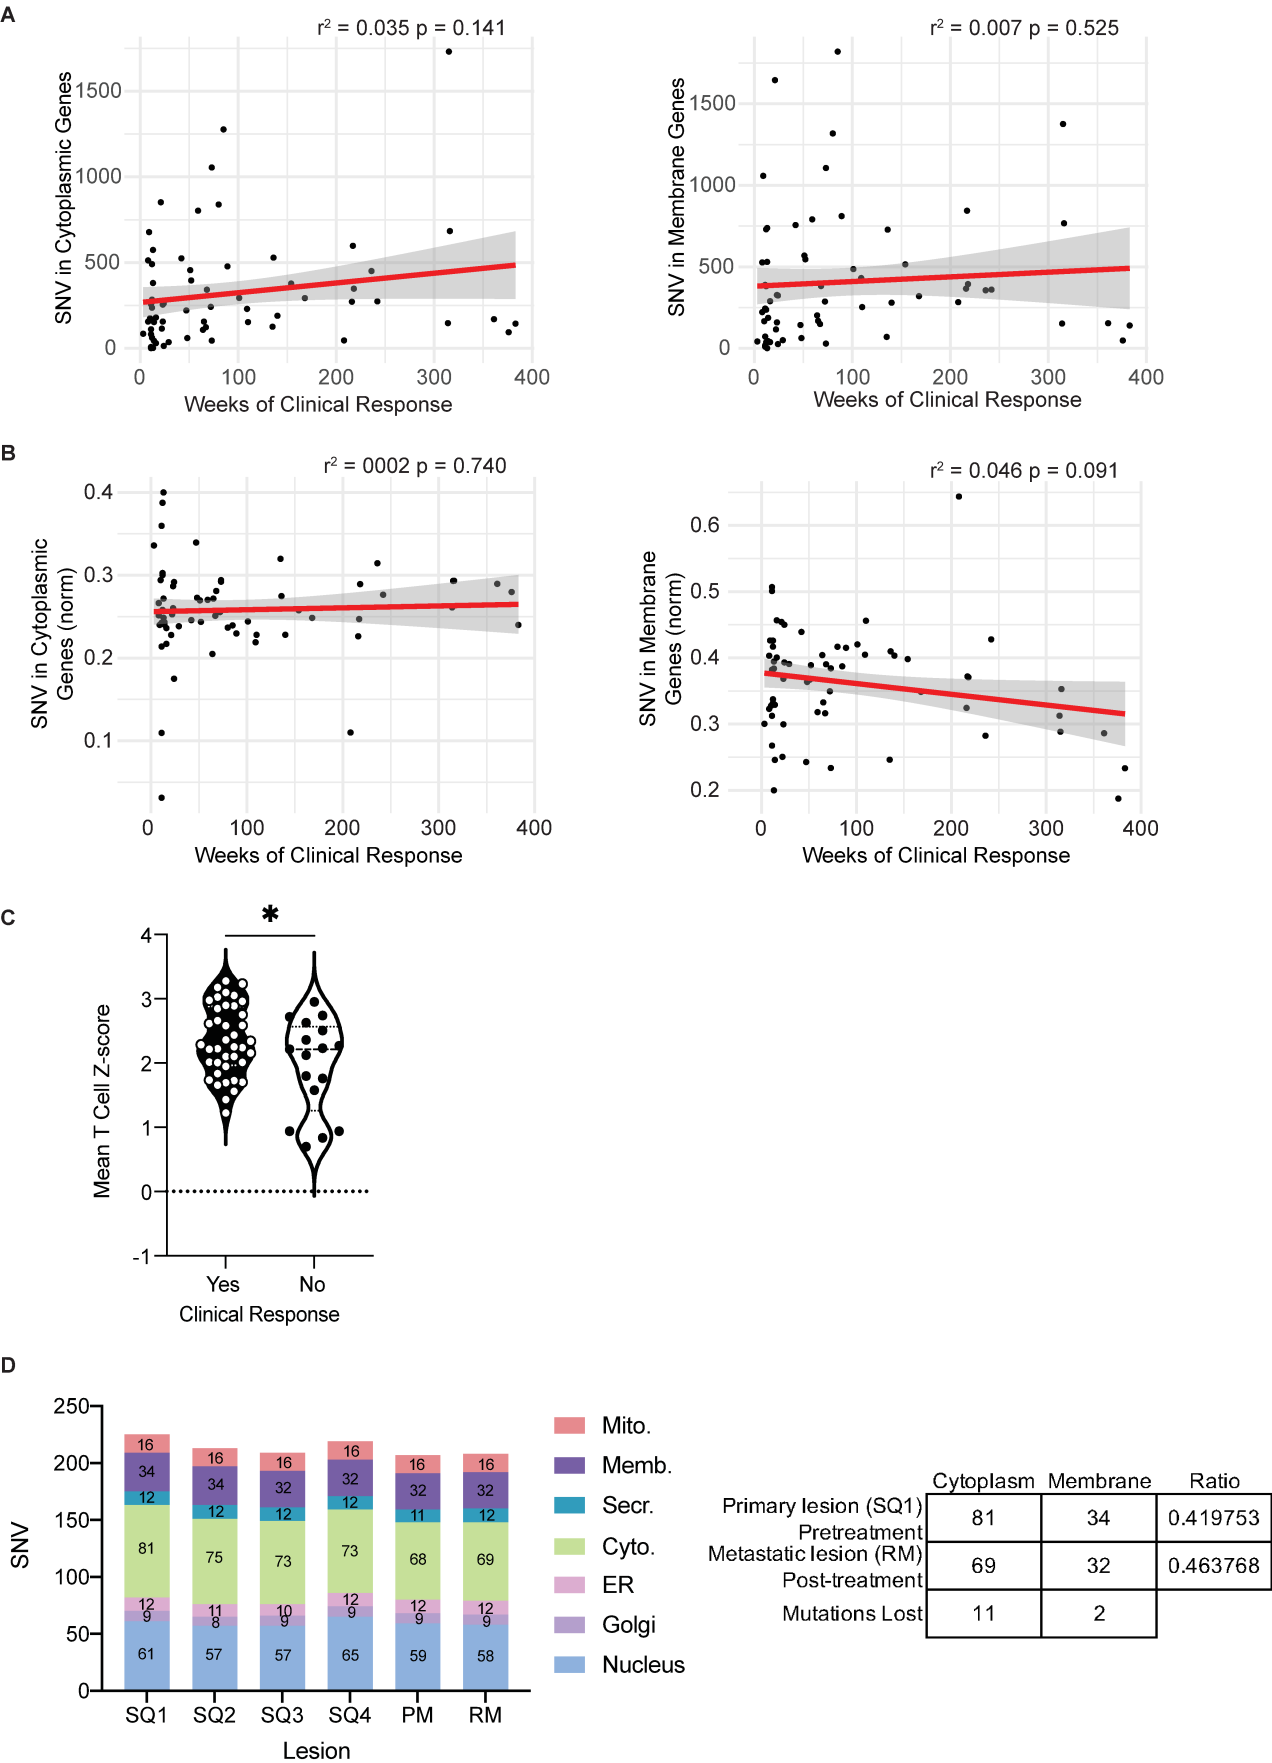

Supplemental Figure 5

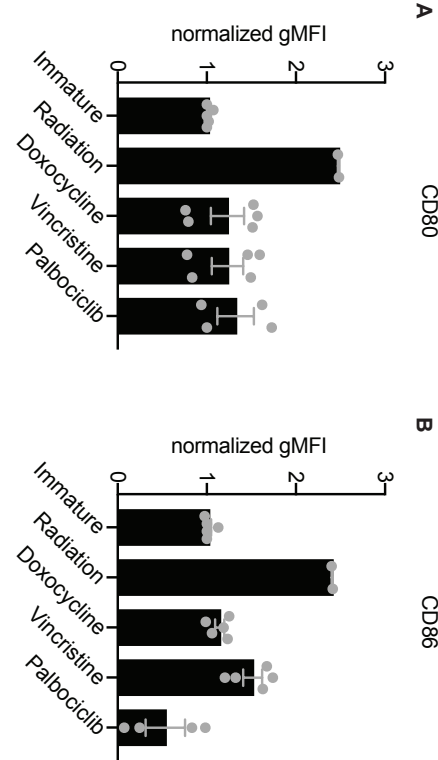

Supplement: jitc-2021-004159supp005_data_supplement.pdf [file jitc-2021-004159supp005_data_supplement.pdf]
